# Supplementary material for: Perinatal Obesity Induces Hepatic Growth Restriction with Increased DNA Damage Response, Senescence, and Dysregulated Igf-1-Akt-Foxo1 Signaling in Male Offspring of Obese Mice
Source: MDPI journal article supplement (doi:10.3390/ijms23105609), 2022-05-17
Supplement: s1 [file s1]

## **Supplementary Material**

**Title of manuscript:** Perinatal obesity induces hepatic growth restriction with increased DNA damage response, senescence and dysregulated IGF-1-AKT-FoxO1 signaling in male offspring of obese mice

**Authors:** Philipp Kasper, Jaco Selle, Christina Vohlen, Rebecca Wilke, Celien Kuiper-Makris, Oleksiy Klymenko, Inga-Bae-Gartz, Charlotte Schömig, Alexander Quaas, Björn Schumacher, Münevver Demir, Martin Bürger, Sonja Lang, Anna Martin, Hans-Michael Steffen, Tobias Goeser, Jörg Doetsch and Miguel A. Alejandre Alcazar

### **List of contents:**

1. Supplementary Table S1 (Experimental diets)
2. Supplementary Table S2 (Primer list, real time RT-PCR)
3. Supplementary Table S3 (Antibody list, immunoblots)
4. Supplementary Table S4 (Proteomic analysis; Overview of all identified proteins)
5. Supplementary Table S5 (Proteomic analysis; Overview of all significantly altered pathways in the offspring by maternal diet)

## 1. Supplementary Table S1

Information on crude nutrients and energy density of the experimental diets:

|                        |  |         | <b>SD</b>                     | <b>HFD</b>             |
|------------------------|--|---------|-------------------------------|------------------------|
| Name                   |  |         | <b>R/M-Maintenance</b>        | <b>C1057, modified</b> |
| Company                |  |         | Ssniff                        | Altromin               |
| Order number           |  |         | V1534 -000                    | 10005791               |
| Additional information |  |         | complete feed for rats & mice | high fat diet          |
| Metab. Energy          |  | kcal/kg | 3225                          | 5237                   |
| Metab. Energy          |  | MJ/kg   | 13,5                          | 21,9                   |
|                        |  |         |                               |                        |
| Fat                    |  | kJ%     | 9                             | 60                     |
| Protein                |  | kJ%     | 24                            | 16                     |
| Carbohydrates          |  | kJ%     | 67                            | 24                     |
| Sugar                  |  | kJ%     | 8,8                           | 7,0                    |
|                        |  |         |                               |                        |
| Crude Fat              |  | g/kg    | 19,00                         | 20,80                  |
| Crude Protein          |  | g/kg    | 3,30                          | 35,10                  |
| Crude Fibre            |  | g/kg    | 5,00                          | 0,39                   |
| Crude Ash              |  | g/kg    | 6,40                          | 6,10                   |
| N free extracts        |  | g/kg    | 41,3                          | 41,7                   |
|                        |  |         |                               |                        |
| <b>Sugar</b>           |  |         |                               |                        |
| Sucrose                |  | g/kg    | 190,0                         | 208,0                  |
| Monosaccharides        |  | g/kg    | 33,0                          | 351,0                  |
| Dissacharides          |  | g/kg    | 413,0                         | 417,0                  |
| Sugar (total)          |  | g/kg    | 54,0                          | 121,0                  |
|                        |  |         |                               |                        |

## 2. Supplementary Table S2

List of primers used for real-time RT-PCR:

| Gene                                                 | Primer                                         | Primer sequence 5'-3'                                                                  |
|------------------------------------------------------|------------------------------------------------|----------------------------------------------------------------------------------------|
| Bax<br>(Bcl-2-associated X protein)                  | for<br><br>rev<br><br>Probe<br>(FAM,<br>TAMRA) | TGCTGATGGCAACTTCAACTG<br>TTTAGTGACAGGGCCTTGAG<br>CCGCGTGGTTGCCCTCTTCTACTTTG            |
| Bcl2<br>(B-cell lymphoma 2)                          | for<br><br>rev<br><br>Probe<br>(FAM,<br>TAMRA) | GCATCACTCTGGGTGCATACC<br>GCTTTAGTGAACCTTTTGCATATTTG<br>CCACAAGTGAGGTGACAAACCTGCC       |
| Col1a1<br>(Collagen type I alpha 1)                  | for<br><br>rev                                 | GCAGTGCTGTTGCGATCTTG<br>CAGAGGGACAGAGCACAGCTT                                          |
| Ccnd1<br>(Cyclin D1)                                 | for<br><br>rev<br><br>Probe<br>(FAM,<br>TAMRA) | CGCCCTCCGTATCTTACTTCAA<br>CTCACAGACCTCCAGCATCCA<br>CCATGCGGAAAATCGTGGCCAC              |
| Ccnd2<br>(Cyclin D2)                                 | for<br><br>rev<br><br>Probe<br>(FAM,<br>TAMRA) | CAGCAGGATGATGAAGTGAACAC<br>GGCTTTGAGACAATCCACATCAG<br>CTCACGTGTGATGCCCTGACAGAGC        |
| Gapdh                                                | for<br><br>rev<br><br>Probe<br>(FAM,<br>TAMRA) | ATGTGTCCGTCTGTGGATCTGA<br>TGCCTGCTTCACCACCTTCT<br>CCGCCTGGAGAAACCTGCCAAGTATG           |
| Il6<br>(Interleukin 6)                               | for<br><br>rev<br><br>Probe<br>(FAM,<br>TAMRA) | ACAAGTCGGAGGCTTAATTACACAT<br>AATCAGAATTGCCATTGCCCAA<br>TCTTTTCTCATTTCCACGATTTCCCAGAGAA |
| Igf-1 <sup>1</sup><br>(Insulin-like growth factor 1) | for<br><br>rev                                 | GCTGGTGGATGCTCTTCAGTT<br>GGTGCCCTCCGAATGCT                                             |

|                                                                       |                                        |                                                                                    |
|-----------------------------------------------------------------------|----------------------------------------|------------------------------------------------------------------------------------|
| Igfr <sup>1</sup><br>(Insulin-like growth factor 1 receptor)          | for<br>rev                             | GCTTCCTGTGAAAGTGATGTTCTC<br>CGTTTTTAAATGGTGCCTCC                                   |
| Igfbp1 <sup>1</sup><br>(Insulin-like growth factor-binding protein 1) | for<br>rev                             | CAGGGAGCCTGTGTACCAGAA<br>GCAGCCTTTGCCTCTTCATG                                      |
| Igfbp2 <sup>1</sup><br>(Insulin-like growth factor-binding protein 2) | for<br>rev                             | GCCCCCTGGAACATCTCTACT<br>AGAGACATCTTGCACTGCTTAAGGT                                 |
| Igfbp3 <sup>1</sup><br>(Insulin-like growth factor-binding protein 3) | for<br>rev                             | CCAGAACTTCTCCTCCGAGTCTAA<br>GATGATTCAGTGTGTCCTCCATTT                               |
| Il1b <sup>1</sup><br>(Interleukin 1 beta)                             | for<br>rev                             | TGACAGTGATGAGAATGACCTGTTT<br>GGACAGCCCAGGTCAAAGG                                   |
| Insr <sup>1</sup><br>(Insulin receptor)                               | for<br>rev                             | GCAAACAGATGCCACTAATCCTT<br>GGGCTTCCACTTTAAGATAATCTGA                               |
| Irs-1 <sup>1</sup><br>(Insulin Receptor Substrate 1)                  | for<br>rev                             | CCAGAGTCAAGCCTCACACA<br>CCCAACTCAACTCCACCACT                                       |
| Ki67                                                                  | for<br>rev<br>Probe<br>(FAM,<br>TAMRA) | AAATCATGGGCTGATGTTGTAAAA<br>TTGCTTGTGGGTTTCTTTGGA<br>AAACATGTCCCTCAAAAGCAGACGAGCAA |
| Leptin                                                                | for<br>rev<br>Probe<br>(FAM,<br>TAMRA) | TCACCAGGATCAATGACATTTTAC<br>AGCCCAGGAATGAAGTCCAA<br>ACGCAGTCGGTATCCGCCAAGC         |
| Mcp-1<br>(Monocyte chemoattractant protein 1)                         | for<br>rev<br>Probe<br>(FAM,<br>TAMRA) | GGCTCAGCCAGATGCAGTTAAC<br>CTTGGTGACAAAACTACAGCTTCTT<br>CCCCACTCACCTGCTGCTACTCATTCA |
| Nfkb1 <sup>1</sup><br>(Nuclear Factor Kappa B Subunit 1)              | for<br>rev                             | CATCCCGGAGTCACGAAATC<br>GCACAATCTTTAGGGCCATTTT                                     |
| Nfkb2 <sup>1</sup><br>(Nuclear Factor Kappa B Subunit 2)              | for<br>rev                             | TCTAGCCACAGAGATGGAGGAGTT<br>AGGTCCGGGCATTACATTA                                    |

|                                                                                                  |                                                |                                                                                           |
|--------------------------------------------------------------------------------------------------|------------------------------------------------|-------------------------------------------------------------------------------------------|
| p16 <sup>1</sup><br>(Cyclin-dependent kinase inhibitor 2A)                                       | for<br><br>rev<br><br>Probe<br>(FAM,<br>TAMRA) | CAAGACATCGTGCGATATTTGC<br><br>GGGCGTGCTTGAGCTGAA                                          |
| p27<br>(Cyclin-dependent kinase inhibitor 1B)                                                    | for<br><br>rev<br><br>Probe<br>(FAM,<br>TAMRA) | CAAAAGGGCCAACAGAACAGA<br><br>CGAAGGCCGGGCTTCTT<br><br>AAAATGTTTCAGACGGTTCCTCCGAACG        |
| P53                                                                                              | for<br><br>rev<br><br>Probe<br>(FAM,<br>TAMRA) | CAGCGTGGTGGTACCTTATGAG<br><br>GGTCCCACTGGAGTCTTCCA<br><br>AACCGCCGACCTATCCTTACCATCATCA    |
| Pcna<br>(Proliferating cell nuclear antigen)                                                     | for<br><br>rev<br><br>Probe<br>(FAM,<br>TAMRA) | GGAGGCGGTAACCATAGAGATG<br><br>ACAGTGGAGTGGCTTTTGTGAA<br><br>ATGAGCCTGTTACCTAACGTTTGCTCTGA |
| Ppargc1a<br>(Peroxisome proliferator-activated<br>receptor gamma coactivator 1-<br>alpha,PGC-1α) | for<br><br>rev<br><br>Probe<br>(FAM,<br>TAMRA) | TCGAAAAAGAAGTCCCATACACAA<br><br>TTCCACACTTAAGGTTGCTCAATA<br><br>CACCAAATGACCCCAAGGGTTCCC  |
| Tfam<br>(Mitochondrial transcription factor A)                                                   | for<br><br>rev<br><br>Probe<br>(FAM,<br>TAMRA) | GGAATGTGGAGCGTGCTAA<br><br>GGATAGCTACCCATGCTGGAAA<br><br>CGCATCCCCTCGTCTATCAGTCTTGTCTGTA  |
| Timp1<br>(TIMP metalloproteinase inhibitor 1)                                                    | for<br><br>rev<br><br>Probe<br>(FAM,<br>TAMRA) | ACCTGGTCATAAGGGCTAAATTCA<br><br>CCGGATATCTGCGGCATT<br><br>TTCCCCAGAAATCAACGAGACCACCTT     |
| Tnfa <sup>1</sup><br>(Tumor necrosis factor-alpha)                                               | for<br><br>rev                                 | AGGGATGAGAAGTTCCCAAATG<br><br>GCTTGCTCACTCGAATTTTGAGAAG                                   |

<sup>1</sup>Genes were measured by the SYBR-Green method. No probe was needed.

Abbreviations: FAM, 6-carboxyfluorescein; TAMRA, tetramethylrhodamine.

### 3. Supplementary Table S3

Blots were probed with the following antibodies:

| Primary antibody                                               | Description                                                  | Purchased from                                        |
|----------------------------------------------------------------|--------------------------------------------------------------|-------------------------------------------------------|
| phospho-AMPK- $\alpha$<br>(Thr172)                             | Monoclonal rabbit anti-phosphorylated AMPK $\alpha$ , 1:1000 | Cell Signaling, Danvers, MA, USA; catalog no. 2535    |
| AMPK- $\alpha$<br>(AMP-activated protein kinase alpha subunit) | Monoclonal rabbit anti-total AMPK $\alpha$ , 1:2000          | Cell Signaling, Danvers, MA, USA; catalog no. 2603    |
| phospho-AKT<br>(Ser473)                                        | Monoclonal rabbit anti-phosphorylated AKT; 1:1000            | Cell Signaling, Danvers, MA, USA; catalog no. 4058    |
| AKT                                                            | Monoclonal rabbit anti-total AKT, 1:2000                     | Cell Signaling, Danvers, MA, USA; catalog no. 9272    |
| Insulin receptor $\beta$                                       | Monoclonal rabbit anti-InsR, 1:1000                          | Cell Signaling, Danvers, MA, USA; catalog no. 3025    |
| Insulin-like growth factor 1 (IGF-1) receptor type 1           | Monoclonal rabbit anti-InsR, 1:1000                          | Cell Signaling, Danvers, MA, USA; catalog no. 3027    |
| Proliferating cell nuclear antigen (PCNA)                      | Monoclonal mouse anti PCNA, 1:5000                           | Aligent Dako, Santa Clara, CA, USA; catalog no. M0879 |
| phospho-STAT3<br>(Tyr705),                                     | Monoclonal rabbit anti-phospho-STAT3, 1:1000                 | Cell Signaling, Danvers, MA, catalog no. 9145         |
| STAT-3                                                         | Monoclonal mouse anti- total STAT3, 1:2000                   | Cell Signaling, Danvers, MA, catalog no. 9139         |
| p21<br>(Cyclin Dependent Kinase Inhibitor 1A)                  | Monoclonal mouse anti-total p21, 1:200                       | Invitrogen, Waltham, MA, USA; catalog no. MA5-31479   |
| p gamma H2A.X<br>( $\gamma$ H2A.X Ser139)                      | Monoclonal rabbit Anti- gamma H2A.X, 1:400                   | Abcam, Cambridge, Great Britain; catalog no. ab11174  |
| Phospho p38<br>(Thr180/Tyr182)                                 | Monoclonal rabbit                                            | Cell Signaling, Danvers, MA, USA; catalog no. 4511    |

|                                                                                                                                                               |                                                                                 |                                                                  |
|---------------------------------------------------------------------------------------------------------------------------------------------------------------|---------------------------------------------------------------------------------|------------------------------------------------------------------|
|                                                                                                                                                               | anti-phospho p38, 1:1000                                                        |                                                                  |
| p38                                                                                                                                                           | Monoclonal rabbit<br>anti-total p38, 1:2000                                     | Cell Signaling, Danvers, MA, USA,<br>catalog no. 9212            |
| p53                                                                                                                                                           | Monoclonal rabbit<br>anti- p53, 1:1000                                          | Thermo Fisher Scientific, Waltham,<br>MA, catalog no. RB-9006-PO |
| phospho-NF- $\kappa$ B p65<br>(Ser536)                                                                                                                        | Monoclonal rabbit<br>anti phospho-NF- $\kappa$ B p65, 1:1000                    | Cell Signaling, Danvers, MA, USA,<br>catalog no. 3033            |
| NF- $\kappa$ B p65                                                                                                                                            | Monoclonal rabbit<br>anti NF- $\kappa$ B p65, 1:1000                            | Cell Signaling, Danvers, MA, USA,<br>catalog no. 8242            |
| $\beta$ -Actin<br>(Loading                                                                                                                                    | Monoclonal mouse anti $\beta$ -actin<br>1:5000) served as a loading<br>control. | Cell Signaling, Danvers, MA, USA,<br>catalog no. 3700            |
| Secondary antibody:                                                                                                                                           |                                                                                 |                                                                  |
| <p>Anti-rabbit IgG (horseradish peroxidase–linked;<br/>Cell Signaling Technology, Danvers, MA, USA catatolg no. 7074) was used as secondary<br/>antibody.</p> |                                                                                 |                                                                  |

## 4. Supplemental Table S4

List of all identified proteins in the proteomic screen at P21

| No. | Protein     | Gene      | Description                                                          | -Log Student's T-test p-value | Difference_Log2(fold-change) |
|-----|-------------|-----------|----------------------------------------------------------------------|-------------------------------|------------------------------|
| 1   | AMY1_MOUSE  | Amy1      | Alpha-amylase 1                                                      | 4,60922                       | -2,62907                     |
| 2   | IGF1_MOUSE  | Igf1      | Insulin-like growth factor I                                         | 4,71989                       | 3,22718                      |
| 3   | TRY2_MOUSE  | Prss2     | Anionic trypsin-2                                                    | 3,21568                       | -5,00773                     |
| 4   | PRG2_MOUSE  | Prg2      | Bone marrow proteoglycan                                             | 4,76846                       | 2,69596                      |
| 5   | CP7A1_MOUSE | Cyp7a1    | Cytochrome P450 7A1                                                  | 2,70063                       | -2,70129                     |
| 6   | UPP2_MOUSE  | Upp2      | Uridine phosphorylase 2                                              | 7,75122                       | -5,49209                     |
| 7   | ATTY_MOUSE  | Tat       | Tyrosine aminotransferase                                            | 3,58592                       | -2,13026                     |
| 8   | CSAD_MOUSE  | Csad      | Cysteine sulfinic acid decarboxylase                                 | 5,00377                       | 1,9675                       |
| 9   | LPP60_MOUSE | Aspg      | 60 kDa lysophospholipase                                             | 0,285613                      | -0,283841                    |
| 10  | DHX8_MOUSE  | Dhx8      | ATP-dependent RNA helicase DHX8                                      | 0,595396                      | -0,720249                    |
| 11  | BIG2_MOUSE  | Argef2    | Brefeldin A-inhibited guanine nucleotide-exchange protein 2          | 0,287579                      | -0,301965                    |
| 12  | SMUF2_MOUSE | Smurf2    | E3 ubiquitin-protein ligase SMURF2                                   | 0,354756                      | -0,176146                    |
| 13  | K1522_MOUSE | Kiaa1522  | Uncharacterized protein KIAA1522                                     | 0,361409                      | 0,345546                     |
| 14  | PTPRF_MOUSE | Ptprf     | Receptor-type tyrosine-protein phosphatase F                         | 0,0663575                     | -0,0588051                   |
| 15  | OSBL9_MOUSE | Osbpl9    | Oxysterol-binding protein-related protein 9                          | 0,29872                       | -0,187315                    |
| 16  | DDI2_MOUSE  | Ddi2      | Protein DDI1 homolog 2                                               | 0,614041                      | 0,295199                     |
| 17  | CKAP5_MOUSE | Ckap5     | Cytoskeleton-associated protein 5                                    | 0,641486                      | 0,381702                     |
| 18  | MA1B1_MOUSE | Man1b1    | Endoplasmic reticulum mannosyl-oligosaccharide 1,2-alpha-mannosidase | 0,468532                      | 0,319627                     |
| 19  | MA7D1_MOUSE | Map7d1    | MAP7 domain-containing protein 1                                     | 0,532241                      | 0,501106                     |
| 20  | FGGY_MOUSE  | Fggy      | FGGY carbohydrate kinase domain-containing protein                   | 0,428773                      | 0,355222                     |
| 21  | ACNT1_MOUSE | Acnat1    | Acyl-coenzyme A amino acid N-acyltransferase 1                       | 0,572816                      | 0,415279                     |
| 22  | SHRM2_MOUSE | Shroom2   | Protein Shroom2                                                      | 1,07217                       | 0,93689                      |
| 23  | UBR4_MOUSE  | Ubr4      | E3 ubiquitin-protein ligase UBR4                                     | 0,0527886                     | -0,0338684                   |
| 24  | SKT_MOUSE   | Skt       | Sickle tail protein                                                  | 0,590844                      | 0,304812                     |
| 25  | SPEB_MOUSE  | Agmat     | Agmatinase, mitochondrial                                            | 0,413942                      | 0,145953                     |
| 26  | AGRIN_MOUSE | Agrn      | Agrin                                                                | 1,02882                       | -0,738444                    |
| 27  | SCMC2_MOUSE | Slc25a25  | Calcium-binding mitochondrial carrier protein SCaMC-2                | 0,558562                      | 0,160556                     |
| 28  | DHTK1_MOUSE | Dhtkd1    | Probable 2-oxoglutarate dehydrogenase E1                             | 0,610939                      | -0,408257                    |
| 29  | RBGP1_MOUSE | Rabgap1   | Rab GTPase-activating protein 1                                      | 0,112617                      | -0,101908                    |
| 30  | ARGAL_MOUSE | Arhgef10l | Rho guanine nucleotide exchange factor 10-like protein               | 0,34321                       | 0,400511                     |
| 31  | MOCS3_MOUSE | Mocs3     | Adenylyltransferase and sulfurtransferase MOCS3                      | 0,856445                      | 0,614841                     |
| 32  | ARI1A_MOUSE | Arid1a    | AT-rich interactive domain-containing protein 1A                     | 1,62218                       | 0,482361                     |
| 33  | UH1BL_MOUSE | Uhrf1bp1l | UHRF1-binding protein 1-like                                         | 0,451001                      | 0,29528                      |
| 34  | DEN5B_MOUSE | Dennd5b   | DENN domain-containing protein 5B                                    | 0,140328                      | -0,0727348                   |
| 35  | TRM1L_MOUSE | Trmt1l    | TRMT1-like protein                                                   | 0,915706                      | 0,253371                     |
| 36  | RGPA2_MOUSE | Ralgapa2  | Ral GTPase-activating protein subunit alpha-2                        | 0,802658                      | 0,504702                     |
| 37  | TTC38_MOUSE | Ttc38     | Tetratricopeptide repeat protein 38                                  | 0,0166576                     | -0,00790367                  |
| 38  | METH_MOUSE  | Mtr       | Methionine synthase                                                  | 0,448913                      | 0,298833                     |
| 39  | MIPEP_MOUSE | Mipep     | Mitochondrial intermediate peptidase                                 | 0,177195                      | 0,0934769                    |
| 40  | DEN4C_MOUSE | Dennd4c   | DENN domain-containing protein 4C                                    | 0,452429                      | 0,290934                     |
| 41  | D19L1_MOUSE | Dpy19l1   | Probable C-mannosyltransferase DPY19L1                               | 0,24776                       | -0,440895                    |
| 42  | ITI4_MOUSE  | Itih4     | Inter alpha-trypsin inhibitor, heavy chain 4                         | 0,673345                      | 0,254615                     |
| 43  | EKI2_MOUSE  | Etnk2     | Ethanolamine kinase 2                                                | 0,34736                       | -0,462049                    |
| 44  | CISD3_MOUSE | Cisd3     | CDGSH iron-sulfur domain-containing protein 3, mitochondrial         | 0,332825                      | -0,151203                    |
| 45  | UBP24_MOUSE | Usp24     | Ubiquitin carboxyl-terminal hydrolase 24                             | 0,008969                      | 0,00802765                   |
| 46  | THOC2_MOUSE | Thoc2     | THO complex subunit 2                                                | 0,236507                      | 0,248735                     |
| 47  | PYR1_MOUSE  | Cad       | CAD protein                                                          | 0,948332                      | 0,477317                     |



|    |                 |                   |                                                                |            |            |
|----|-----------------|-------------------|----------------------------------------------------------------|------------|------------|
| 48 | YTDC2_MOUSE     | Ythdc2            | 3'-5' RNA helicase YTHDC2                                      | 0,622057   | 0,501745   |
| 49 | OTUD4_MOUSE     | Otud4             | OTU domain-containing protein 4                                | 1,00013    | 0,386871   |
| 50 | OTU7B_MOUSE     | Otud7b            | OTU domain-containing protein 7B                               | 0,314819   | 0,264807   |
| 51 | TPC11_MOUSE     | Trappc11          | Trafficking protein particle complex subunit 11                | 0,922459   | -0,576794  |
| 52 | PLXB2_MOUSE     | Plxnb2            | Plexin-B2                                                      | 1,41314    | 0,420562   |
| 53 | RBM25_MOUSE     | Rbm25             | RNA-binding protein 25                                         | 0,152457   | 0,0614315  |
| 54 | XPP3_MOUSE      | Xpnpep3           | Xaa-Pro aminopeptidase 3                                       | 1,2638     | 0,562651   |
| 55 | ITA9_MOUSE      | Itga9             | Integrin alpha-9                                               | 0,235551   | -0,12433   |
| 56 | DAAF5_MOUSE     | Dnaaf5            | Dynein assembly factor 5, axonemal                             | 0,873623   | 0,470064   |
| 57 | MFA1A_MOUSE;MF  | Mfap1a;Mfap1b     | Microfibrillar-associated protein 1A                           | 0,140742   | -0,11334   |
| 58 | H2A1B_MOUSE;H2f | H2afj;Hist1h2ab;I | Histone H2A type 1-B                                           | 0,203148   | -0,153691  |
| 59 | RNT2A_MOUSE;RN  | Rnaset2a;RnaseI   | Ribonuclease T2-A                                              | 0,545506   | -0,228217  |
| 60 | SAFB1_MOUSE     | Safb              | Scaffold attachment factor B1                                  | 0,338537   | 0,178955   |
| 61 | CCDC6_MOUSE     | Ccdc6             | Coiled-coil domain-containing protein 6                        | 0,231941   | 0,212493   |
| 62 | BIN2_MOUSE      | Bin2              | Bridging integrator 2                                          | 0,804084   | 0,676822   |
| 63 | FIBA_MOUSE      | Fga               | Fibrinogen alpha chain                                         | 0,844199   | 0,57374    |
| 64 | GCN1_MOUSE      | Gcn1              | eIF-2-alpha kinase activator GCN1                              | 0,0868579  | 0,0532825  |
| 65 | SET1A_MOUSE     | Setd1a            | Histone-lysine N-methyltransferase SETD1A                      | 0,13402    | -0,15428   |
| 66 | PARP4_MOUSE     | Parp4             | Protein mono-ADP-ribosyltransferase PARP4                      | 1,25288    | 0,64562    |
| 67 | ASCC3_MOUSE     | Ascc3             | Activating signal cointegrator 1 complex subunit 3             | 0,0657224  | -0,0371323 |
| 68 | CHD2_MOUSE      | Chd2              | Chromodomain-helicase-DNA-binding protein 2                    | 0,931649   | -0,340173  |
| 69 | AKP13_MOUSE     | Akap13            | A-kinase anchor protein 13                                     | 0,812926   | 0,217504   |
| 70 | C2CD2_MOUSE     | C2cd2             | C2 domain-containing protein 2                                 | 0,550768   | -0,238201  |
| 71 | APOB_MOUSE      | Apob              | Apolipoprotein B-100                                           | 0,671131   | 0,345029   |
| 72 | ARI1B_MOUSE     | Arid1b            | AT-rich interactive domain-containing protein 1B               | 0,601797   | 0,363103   |
| 73 | RN213_MOUSE     | Rnf213            | E3 ubiquitin-protein ligase RNF213                             | 0,609496   | 0,355637   |
| 74 | DESP_MOUSE      | Dsp               | Desmoplakin                                                    | 1,41863    | 0,580641   |
| 75 | NOLC1_MOUSE     | Nolc1             | Nucleolar and coiled-body phosphoprotein 1                     | 0,694026   | 0,424923   |
| 76 | MYO1E_MOUSE     | Myo1e             | Unconventional myosin-Ie                                       | 1,1889     | 0,451371   |
| 77 | BD1L1_MOUSE     | Bod1l             | Biorientation of chromosomes in cell division protein 1-like 1 | 0,0250165  | 0,0453171  |
| 78 | NUMA1_MOUSE     | Numa1             | Nuclear mitotic apparatus protein 1                            | 0,444495   | 0,166167   |
| 79 | DJC21_MOUSE     | Dnajc21           | DnaJ homolog subfamily C member 21                             | 0,222688   | 0,287266   |
| 80 | HELZ2_MOUSE     | Helz2             | Helicase with zinc finger domain 2                             | 0,611103   | 0,61557    |
| 81 | SC16A_MOUSE     | Sec16a            | Protein transport protein Sec16A                               | 1,32155    | 0,491949   |
| 82 | TPR_MOUSE       | Tpr               | Nucleoprotein TPR                                              | 0,604038   | 0,113947   |
| 83 | FARP1_MOUSE     | Farp1             | FERM, ARHGEF and pleckstrin domain-containing protein 1        | 0,0610052  | -0,0392525 |
| 84 | AOXC_MOUSE      | Aox3              | Aldehyde oxidase 3                                             | 0,221333   | 0,235994   |
| 85 | AT2B1_MOUSE     | Atp2b1            | Plasma membrane calcium-transporting ATPase 1                  | 0,21828    | 0,140683   |
| 86 | TRIP12_MOUSE    | Trip12            | E3 ubiquitin-protein ligase TRIP12                             | 0,184381   | 0,0965187  |
| 87 | ANK3_MOUSE      | Ank3              | Ankyrin-3                                                      | 0,0657122  | -0,169185  |
| 88 | AGRF5_MOUSE     | Adgrf5            | Adhesion G protein-coupled receptor F5                         | 0,00280246 | 0,00340843 |
| 89 | CAN2_MOUSE      | Capn2             | Calpain-2 catalytic subunit                                    | 0,83452    | 0,227911   |
| 90 | BIN1_MOUSE      | Bin1              | Myc box-dependent-interacting protein 1                        | 0,38815    | 0,56845    |
| 91 | SC22B_MOUSE     | Sec22b            | Vesicle-trafficking protein SEC22b                             | 0,521456   | 0,343167   |
| 92 | DPYL2_MOUSE     | Dpysl2            | Dihydropyrimidinase-related protein 2                          | 0,306012   | 0,253717   |
| 93 | LEG9_MOUSE      | Lgals9            | Galectin-9                                                     | 0,0578642  | 0,033865   |
| 94 | EMD_MOUSE       | Emd               | Emerin                                                         | 0,62912    | 0,176661   |
| 95 | GTPB1_MOUSE     | Gtbp1             | GTP-binding protein 1                                          | 0,946933   | -0,308851  |
| 96 | THOC4_MOUSE     | Alyref            | THO complex subunit 4                                          | 0,728815   | 0,240137   |
| 97 | CLCA_MOUSE      | Clta              | Clathrin light chain A                                         | 1,05496    | -0,441913  |
| 98 | PTEN_MOUSE      | Pten              | Phosphatidylinositol 3,4,5-trisphosphate 3-phosphatase         | 1,77741    | 1,34702    |
| 99 | STXB1_MOUSE     | Stxbp1            | Syntaxin-binding protein 1                                     | 0,851513   | 0,535283   |

|     |             |          |                                                            |             |              |
|-----|-------------|----------|------------------------------------------------------------|-------------|--------------|
| 100 | NUCG_MOUSE  | Endog    | Endonuclease G, mitochondrial                              | 0,0847508   | -0,0427937   |
| 101 | MTP_MOUSE   | Mttp     | Microsomal triglyceride transfer protein large subunit     | 0,0297534   | 0,0395218    |
| 102 | MYH11_MOUSE | Myh11    | Myosin-11                                                  | 0,230917    | -0,416191    |
| 103 | MAP2_MOUSE  | Metap2   | Methionine aminopeptidase 2                                | 0,5402      | 0,233154     |
| 104 | KNG1_MOUSE  | Kng1     | Kininogen-1                                                | 0,419282    | 0,277584     |
| 105 | NGP_MOUSE   | Ngp      | Neutrophilic granule protein                               | 2,29134     | 2,24039      |
| 106 | PRDX6_MOUSE | Prdx6    | Peroxiredoxin-6                                            | 0,118853    | -0,0853111   |
| 107 | AKAP1_MOUSE | Akap1    | A-kinase anchor protein 1, mitochondrial                   | 0,739109    | 0,729539     |
| 108 | CASP6_MOUSE | Casp6    | Caspase-6                                                  | 0,171774    | -0,0876549   |
| 109 | DLDH_MOUSE  | Dld      | Dihydropolyl dehydrogenase, mitochondrial                  | 0,622681    | 0,266712     |
| 110 | HNF6_MOUSE  | Onecut1  | Hepatocyte nuclear factor 6                                | 0,0776316   | 0,105769     |
| 111 | HCD2_MOUSE  | Hsd17b10 | 3-hydroxyacyl-CoA dehydrogenase type-2                     | 0,996915    | -0,300369    |
| 112 | UBE3A_MOUSE | Ube3a    | Ubiquitin-protein ligase E3A                               | 0,161176    | 0,0837391    |
| 113 | TCOF_MOUSE  | Tcof1    | Treacle protein                                            | 0,179453    | 0,400183     |
| 114 | DCTN1_MOUSE | Dctn1    | Dynactin subunit 1                                         | 0,346939    | 0,166074     |
| 115 | GLU2B_MOUSE | Prkcsh   | Glucosidase 2 subunit beta                                 | 0,927503    | 0,348358     |
| 116 | PRDX4_MOUSE | Prdx4    | Peroxiredoxin-4                                            | 1,99483     | 0,498704     |
| 117 | DIAP1_MOUSE | Diaph1   | Protein diaphanous homolog 1                               | 1,92654     | 0,33991      |
| 118 | U5S1_MOUSE  | Eftud2   | 116 kDa U5 small nuclear ribonucleoprotein component       | 0,104412    | 0,122163     |
| 119 | ELL_MOUSE   | Ell      | RNA polymerase II elongation factor ELL                    | 0,000490143 | -0,000828934 |
| 120 | FAAH1_MOUSE | Faah     | Fatty-acid amide hydrolase 1                               | 1,10297     | 0,664925     |
| 121 | AIP_MOUSE   | Aip      | AH receptor-interacting protein                            | 0,99556     | 0,408405     |
| 122 | FLOT1_MOUSE | Flot1    | Flotillin-1                                                | 1,36763     | 0,579185     |
| 123 | ATOX1_MOUSE | Atox1    | Copper transport protein ATOX1                             | 0,44546     | -1,18076     |
| 124 | PEX5_MOUSE  | Pex5     | Peroxisomal targeting signal 1 receptor                    | 1,09626     | 0,423758     |
| 125 | SNP23_MOUSE | Snap23   | Synaptosomal-associated protein 23                         | 0,390484    | 0,195586     |
| 126 | PSB1_MOUSE  | Psmb1    | Proteasome subunit beta type-1                             | 0,485544    | 0,229786     |
| 127 | HDAC1_MOUSE | Hdac1    | Histone deacetylase 1                                      | 0,703647    | 0,346618     |
| 128 | MP2K3_MOUSE | Map2k3   | Dual specificity mitogen-activated protein kinase kinase 3 | 0,065951    | -0,0333408   |
| 129 | GSTO1_MOUSE | Gsto1    | Glutathione S-transferase omega-1                          | 0,271592    | 0,203801     |
| 130 | CP3AP_MOUSE | Cyp3a25  | Cytochrome P450 3A25                                       | 1,47109     | -1,09434     |
| 131 | MA2B1_MOUSE | Man2b1   | Lysosomal alpha-mannosidase                                | 0,136756    | 0,0789223    |
| 132 | SODE_MOUSE  | Sod3     | Extracellular superoxide dismutase [Cu-Zn]                 | 0,292067    | 0,304996     |
| 133 | RL21_MOUSE  | Rpl21    | 60S ribosomal protein L21                                  | 0,622288    | 0,257167     |
| 134 | GSH0_MOUSE  | Gclm     | Glutamate--cysteine ligase regulatory subunit              | 0,0510829   | -0,0265686   |
| 135 | HGD_MOUSE   | Hgd      | Homogentisate 1,2-dioxygenase                              | 0,465434    | -0,285865    |
| 136 | AMACR_MOUSE | Amacr    | Alpha-methylacyl-CoA racemase                              | 0,733268    | 0,208795     |
| 137 | KIF1C_MOUSE | Kif1c    | Kinesin-like protein KIF1C                                 | 1,417       | 0,57209      |
| 138 | VP26C_MOUSE | Vps26c   | Vacuolar protein sorting-associated protein 26C            | 0,193682    | 0,0708817    |
| 139 | SCRB2_MOUSE | Scarb2   | Lysosome membrane protein 2                                | 1,64833     | 0,664616     |
| 140 | ATN1_MOUSE  | Atn1     | Atrophin-1                                                 | 1,71796     | 2,35218      |
| 141 | C10_MOUSE   | Grcc10   | Protein C10                                                | 2,15525     | 0,794867     |
| 142 | PHB2_MOUSE  | Phb2     | Prohibitin-2                                               | 0,47442     | -0,117195    |
| 143 | ATIF1_MOUSE | ATP5IF1  | ATPase inhibitor, mitochondrial                            | 0,539956    | -0,522665    |
| 144 | COFA1_MOUSE | Col15a1  | Collagen alpha-1(XV) chain                                 | 0,130525    | -0,222908    |
| 145 | DOPD_MOUSE  | Ddt      | D-dopachrome decarboxylase                                 | 0,0620254   | 0,0861275    |
| 146 | CPSF2_MOUSE | Cpsf2    | Cleavage and polyadenylation specificity factor subunit 2  | 0,0940448   | -0,0281258   |
| 147 | PSMD4_MOUSE | Psm4     | 26S proteasome non-ATPase regulatory subunit 4             | 1,57914     | 0,549744     |
| 148 | EXOC7_MOUSE | Exoc7    | Exocyst complex component 7                                | 1,34048     | 0,500913     |
| 149 | DHX15_MOUSE | Dhx15    | Pre-mRNA-splicing factor ATP-dependent RNA helicase DHX15  | 0,492614    | 0,118484     |
| 150 | PURB_MOUSE  | Purb     | Transcriptional activator protein Pur-beta                 | 0,0538433   | 0,025993     |
| 151 | NMI_MOUSE   | Nmi      | N-myc-interactor                                           | 0,270107    | 0,0830948    |

|     |             |         |                                                                |            |            |
|-----|-------------|---------|----------------------------------------------------------------|------------|------------|
| 152 | SRSF5_MOUSE | Srsf5   | Serine/arginine-rich splicing factor 5                         | 0,645563   | -0,284154  |
| 153 | IMA7_MOUSE  | Kpna6   | Importin subunit alpha-7                                       | 0,229396   | 0,110966   |
| 154 | CAN1_MOUSE  | Capn1   | Calpain-1 catalytic subunit                                    | 0,726588   | 0,49407    |
| 155 | AN32A_MOUSE | Anp32a  | Acidic leucine-rich nuclear phosphoprotein 32 family member A  | 1,81961    | -0,600511  |
| 156 | EXOC4_MOUSE | Exoc4   | Exocyst complex component 4                                    | 0,975999   | 0,175736   |
| 157 | PAHX_MOUSE  | Phyh    | Phytanoyl-CoA dioxygenase, peroxisomal                         | 0,0189555  | -0,0174824 |
| 158 | HAX1_MOUSE  | Hax1    | HCLS1-associated protein X-1                                   | 1,25739    | 0,605725   |
| 159 | PLD3_MOUSE  | Plid3   | Phospholipase D3                                               | 0,148402   | 0,0706394  |
| 160 | SPYA_MOUSE  | Agxt    | Serine--pyruvate aminotransferase, mitochondrial               | 1,067      | -0,609003  |
| 161 | PYRD_MOUSE  | Dhodh   | Dihydroorotate dehydrogenase (quinone), mitochondrial          | 0,807668   | 0,339437   |
| 162 | ECH1_MOUSE  | Ech1    | Delta(3,5)-Delta(2,4)-dienoyl-CoA isomerase, mitochondrial     | 2,47266    | 0,730622   |
| 163 | FKBP8_MOUSE | Fkbp8   | Peptidyl-prolyl cis-trans isomerase FKBP8                      | 0,507549   | 0,26951    |
| 164 | S27A2_MOUSE | Slc27a2 | Very long-chain acyl-CoA synthetase                            | 1,14052    | 0,583918   |
| 165 | BHMT1_MOUSE | Bhmt    | Betaine--homocysteine S-methyltransferase 1                    | 1,43163    | -0,592636  |
| 166 | NOTC2_MOUSE | Notch2  | Neurogenic locus notch homolog protein 2                       | 0,554076   | 0,232595   |
| 167 | RABE1_MOUSE | Rabep1  | Rab GTPase-binding effector protein 1                          | 0,595665   | 0,300748   |
| 168 | PSDE_MOUSE  | Psmc14  | 26S proteasome non-ATPase regulatory subunit 14                | 0,165146   | 0,132202   |
| 169 | SCAM3_MOUSE | Scamp3  | Secretory carrier-associated membrane protein 3                | 0,80635    | 0,396841   |
| 170 | HYAL2_MOUSE | Hyal2   | Hyaluronidase-2                                                | 0,520008   | 0,368804   |
| 171 | STAG2_MOUSE | Stag2   | Cohesin subunit SA-2                                           | 1,32548    | -0,782625  |
| 172 | ANXA3_MOUSE | Anxa3   | Annexin A3                                                     | 0,163383   | -0,0991489 |
| 173 | AP1B1_MOUSE | Ap1b1   | AP-1 complex subunit beta-1                                    | 0,633548   | 0,153428   |
| 174 | NEUR1_MOUSE | Neu1    | Sialidase-1                                                    | 0,894771   | 1,16505    |
| 175 | GSTM6_MOUSE | Gstm6   | Glutathione S-transferase Mu 6                                 | 0,0473786  | -0,0602032 |
| 176 | MGLL_MOUSE  | Mgll    | Monoglyceride lipase                                           | 1,44289    | 0,776797   |
| 177 | MYADM_MOUSE | Myadm   | Myeloid-associated differentiation marker                      | 0,609703   | -0,325126  |
| 178 | NDUA1_MOUSE | Ndufa1  | NADH dehydrogenase [ubiquinone] 1 alpha subcomplex subunit 1   | 0,34003    | 0,258551   |
| 179 | NUDC_MOUSE  | Nudc    | Nuclear migration protein nudC                                 | 0,215857   | 0,131532   |
| 180 | PININ_MOUSE | Pnn     | Pinin                                                          | 0,0211206  | -0,0107788 |
| 181 | SPTC1_MOUSE | Sptlc1  | Serine palmitoyltransferase 1                                  | 0,0589543  | 0,0727692  |
| 182 | LIPB2_MOUSE | Pfifbp2 | Liprin-beta-2                                                  | 0,0334622  | -0,0343353 |
| 183 | CP4AE_MOUSE | Cyp4a14 | Cytochrome P450 4A14                                           | 1,17128    | 1,25349    |
| 184 | HNRH1_MOUSE | Hnrmph1 | Heterogeneous nuclear ribonucleoprotein H                      | 0,2877     | 0,345877   |
| 185 | API5_MOUSE  | Api5    | Apoptosis inhibitor 5                                          | 0,0285975  | -0,0170265 |
| 186 | TIM44_MOUSE | Timm44  | Mitochondrial import inner membrane translocase subunit TIM44  | 0,921262   | -0,245686  |
| 187 | CSN5_MOUSE  | Cops5   | COP9 signalosome complex subunit 5                             | 0,14605    | -0,239699  |
| 188 | CALU_MOUSE  | Calu    | Calumenin                                                      | 0,898731   | 0,189204   |
| 189 | SP100_MOUSE | Sp100   | Nuclear autoantigen Sp-100                                     | 1,12438    | 1,09208    |
| 190 | LSM2_MOUSE  | Lsm2    | U6 snRNA-associated Sm-like protein LSM2                       | 0,00658273 | 0,00799789 |
| 191 | FRDA_MOUSE  | Fxn     | Fraixin, mitochondrial                                         | 1,64134    | -1,61768   |
| 192 | AL1A7_MOUSE | Aldh1a7 | Aldehyde dehydrogenase, cytosolic 1                            | 0,348079   | 0,366859   |
| 193 | PSB10_MOUSE | Psmc10  | Proteasome subunit beta type-10                                | 0,231796   | 0,210806   |
| 194 | GAMT_MOUSE  | Gamt    | Guanidinoacetate N-methyltransferase                           | 0,275755   | 0,195629   |
| 195 | RM23_MOUSE  | Mrpl23  | 39S ribosomal protein L23, mitochondrial                       | 0,0922597  | 0,0430111  |
| 196 | ZW10_MOUSE  | Zw10    | Centromere/kinetochore protein zw10 homolog                    | 0,251885   | 0,274789   |
| 197 | CAVN1_MOUSE | Cavin1  | Caveolae-associated protein 1                                  | 0,0808717  | -0,118099  |
| 198 | OST48_MOUSE | Ddost   | Dolichyl-diphosphooligosaccharide--protein glycosyltransferase | 0,482857   | 0,143827   |
| 199 | CP2J5_MOUSE | Cyp2j5  | Cytochrome P450 2J5                                            | 0,601324   | 0,347379   |
| 200 | CP2J6_MOUSE | Cyp2j6  | Cytochrome P450 2J6                                            | 0,79532    | -0,524625  |
| 201 | AOXA_MOUSE  | Aox1    | Aldehyde oxidase 1                                             | 0,426847   | 0,563046   |
| 202 | AP3D1_MOUSE | Ap3d1   | AP-3 complex subunit delta-1                                   | 0,762975   | 0,380339   |
| 203 | MA2B2_MOUSE | Man2b2  | Epididymis-specific alpha-mannosidase                          | 1,06104    | 0,26106    |

|     |              |          |                                                               |            |            |
|-----|--------------|----------|---------------------------------------------------------------|------------|------------|
| 204 | CHKA_MOUSE   | Chka     | Choline kinase alpha                                          | 1,60001    | 1,2239     |
| 205 | IL16_MOUSE   | Il16     | Pro-interleukin-16                                            | 0,207406   | 0,272547   |
| 206 | BYST_MOUSE   | Bysl     | Bystin                                                        | 1,92336    | 0,526053   |
| 207 | CSK22_MOUSE  | Csnk2a2  | Casein kinase II subunit alpha'                               | 1,40221    | 0,390972   |
| 208 | ITB3_MOUSE   | Itgb3    | Integrin beta-3                                               | 0,41571    | -0,752239  |
| 209 | RDH16_MOUSE  | Rdh16    | Retinol dehydrogenase 16                                      | 0,476729   | -0,414701  |
| 210 | REPS1_MOUSE  | Reps1    | RalBP1-associated Eps domain-containing protein 1             | 1,73913    | 0,521913   |
| 211 | AKAP2_MOUSE  | Akap2    | A-kinase anchor protein 2                                     | 0,56734    | 0,416685   |
| 212 | SMCE1_MOUSE  | Smrce1   | SWI/SNF-related matrix-associated actin-dependent regulator   | 1,77135    | 0,618299   |
| 213 | DNJB6_MOUSE  | Dnajb6   | DnaJ homolog subfamily B member 6                             | 0,0376434  | -0,0253307 |
| 214 | BAF_MOUSE    | Banf1    | Barrier-to-autointegration factor                             | 0,420434   | -0,27768   |
| 215 | RNF13_MOUSE  | Rnf13    | E3 ubiquitin-protein ligase RNF13                             | 0,262308   | 0,281155   |
| 216 | ASNA_MOUSE   | Asna1    | ATPase Asna1                                                  | 0,589848   | 0,147019   |
| 217 | SLK_MOUSE    | Slk      | STE20-like serine/threonine-protein kinase                    | 0,133597   | -0,119568  |
| 218 | BNIIP3_MOUSE | Bnip3    | BCL2/adenovirus E1B 19 kDa protein-interacting protein 3      | 2,68239    | -1,93775   |
| 219 | TPPC3_MOUSE  | Trappc3  | Trafficking protein particle complex subunit 3                | 0,233344   | 0,193909   |
| 220 | PGRC1_MOUSE  | Pgrmc1   | Membrane-associated progesterone receptor component 1         | 0,901061   | 0,383833   |
| 221 | IMPA1_MOUSE  | Impa1    | Inositol monophosphatase 1                                    | 1,60424    | 0,406408   |
| 222 | BCKD_MOUSE   | Bckdk    | [3-methyl-2-oxobutanoate dehydrogenase                        | 0,484407   | -0,421981  |
| 223 | COPB2_MOUSE  | Copb2    | Coatomer subunit beta'                                        | 0,666915   | 0,166441   |
| 224 | SYUA_MOUSE   | Snca     | Alpha-synuclein                                               | 0,420099   | -0,355709  |
| 225 | TPMT_MOUSE   | Tpmt     | Thiopurine S-methyltransferase                                | 0,999615   | -0,573256  |
| 226 | BL1S1_MOUSE  | Bloc1s1  | Biogenesis of lysosome-related organelles complex 1 subunit 1 | 0,255068   | 0,233672   |
| 227 | STRN_MOUSE   | Strn     | Striatin                                                      | 0,7488     | 0,568821   |
| 228 | DSG2_MOUSE   | Dsg2     | Desmoglein-2                                                  | 1,79118    | 0,489574   |
| 229 | NIPS1_MOUSE  | Nipsnap1 | Protein NipSnap homolog 1                                     | 0,232449   | 0,175307   |
| 230 | NIPS2_MOUSE  | Nipsnap2 | Protein NipSnap homolog 2                                     | 0,792702   | -0,591191  |
| 231 | SAP18_MOUSE  | Sap18    | Histone deacetylase complex subunit SAP18                     | 0,316397   | 0,157799   |
| 232 | SEPT7_MOUSE  | Septin7  | Septin-7                                                      | 0,623842   | 0,314635   |
| 233 | IF6_MOUSE    | Eif6     | Eukaryotic translation initiation factor 6                    | 1,13165    | 0,473828   |
| 234 | RL35A_MOUSE  | Rpl35a   | 60S ribosomal protein L35a                                    | 0,80804    | 0,453584   |
| 235 | AT2A2_MOUSE  | Atp2a2   | Sarcoplasmic/endoplasmic reticulum calcium ATPase 2           | 0,325177   | -0,264781  |
| 236 | SPT5H_MOUSE  | Supt5h   | Transcription elongation factor SPT5                          | 1,57849    | 0,589685   |
| 237 | ILK_MOUSE    | Ilk      | Integrin-linked protein kinase                                | 0,294439   | -0,297627  |
| 238 | CHKB_MOUSE   | Chkb     | Choline/ethanolamine kinase                                   | 1,16598    | 0,37384    |
| 239 | PSB5_MOUSE   | Psmb5    | Proteasome subunit beta type-5                                | 0,34515    | 0,157587   |
| 240 | DHX9_MOUSE   | Dhx9     | ATP-dependent RNA helicase A                                  | 0,179607   | 0,0928577  |
| 241 | DPM1_MOUSE   | Dpm1     | Dolichol-phosphate mannosyltransferase subunit 1              | 0,039703   | -0,0455898 |
| 242 | PI42A_MOUSE  | Pip4k2a  | Phosphatidylinositol 5-phosphate 4-kinase type-2 alpha        | 0,422964   | 0,388544   |
| 243 | EIF3D_MOUSE  | Eif3d    | Eukaryotic translation initiation factor 3 subunit D          | 0,535524   | 0,163395   |
| 244 | AIF1_MOUSE   | Aif1     | Allograft inflammatory factor 1                               | 0,0996384  | -0,146147  |
| 245 | EF1B_MOUSE   | Eef1b    | Elongation factor 1-beta                                      | 1,56498    | 0,279131   |
| 246 | HMOX2_MOUSE  | Hmox2    | Heme oxygenase 2                                              | 0,173613   | -0,0777317 |
| 247 | ATX2_MOUSE   | Atxn2    | Ataxin-2                                                      | 1,74438    | 0,44291    |
| 248 | NMT1_MOUSE   | Nmt1     | Glycylpeptide N-tetradecanoyltransferase 1                    | 0,591871   | -0,410671  |
| 249 | NMT2_MOUSE   | Nmt2     | Glycylpeptide N-tetradecanoyltransferase 2                    | 0,144325   | -0,12873   |
| 250 | E41L2_MOUSE  | Epb41l2  | Band 4.1-like protein 2                                       | 1,12911    | 0,618185   |
| 251 | GPX4_MOUSE   | Gpx4     | Phospholipid hydroperoxide glutathione peroxidase             | 0,284521   | 0,414174   |
| 252 | PHLD_MOUSE   | Gpld1    | Phosphatidylinositol-glycan-specific phospholipase D          | 0,00481734 | 0,00360641 |
| 253 | EMC8_MOUSE   | Emc8     | ER membrane protein complex subunit 8                         | 1,31529    | 0,45994    |
| 254 | PDL1_MOUSE   | Pdlim1   | PDZ and LIM domain protein 1                                  | 0,355886   | -0,530625  |
| 255 | VAMP8_MOUSE  | Vamp8    | Vesicle-associated membrane protein 8                         | 0,896311   | -0,326622  |

|     |             |          |                                                                |           |             |
|-----|-------------|----------|----------------------------------------------------------------|-----------|-------------|
| 256 | PSA3_MOUSE  | Psm3     | Proteasome subunit alpha type-3                                | 0,118296  | -0,137832   |
| 257 | UGDH_MOUSE  | Ugdh     | UDP-glucose 6-dehydrogenase                                    | 0,373346  | 0,319511    |
| 258 | VAMP4_MOUSE | Vamp4    | Vesicle-associated membrane protein 4                          | 0,374898  | -0,515882   |
| 259 | SNX3_MOUSE  | Snx3     | Sorting nexin-3                                                | 0,797801  | 0,287064    |
| 260 | SNX12_MOUSE | Snx12    | Sorting nexin-12                                               | 0,291345  | 0,234904    |
| 261 | DHB12_MOUSE | Hsd17b12 | Very-long-chain 3-oxoacyl-CoA reductase                        | 0,27571   | 0,270237    |
| 262 | SRPK1_MOUSE | Srp1     | SRSF protein kinase 1                                          | 0,186433  | 0,118496    |
| 263 | PIGR_MOUSE  | Pigr     | Polymeric immunoglobulin receptor                              | 0,0369606 | 0,0669176   |
| 264 | DTNB_MOUSE  | Dtnb     | Dystrobrevin beta                                              | 0,0920602 | -0,121644   |
| 265 | CSKP_MOUSE  | Cask     | Peripheral plasma membrane protein CASK                        | 0,234645  | 0,0822594   |
| 266 | PFD2_MOUSE  | Pfdn2    | Prefoldin subunit 2                                            | 0,54745   | 0,369526    |
| 267 | CFDP1_MOUSE | Cfdp1    | Craniofacial development protein 1                             | 0,105505  | -0,176973   |
| 268 | ZN326_MOUSE | Znf326   | DBIRD complex subunit ZNF326                                   | 0,0291628 | 0,0233345   |
| 269 | NID2_MOUSE  | Nid2     | Nidogen-2                                                      | 0,116445  | 0,132233    |
| 270 | WDR1_MOUSE  | Wdr1     | WD repeat-containing protein 1                                 | 1,31013   | 0,314067    |
| 271 | IKKB_MOUSE  | Ikbkb    | Inhibitor of nuclear factor kappa-B kinase subunit beta        | 2,4728    | 0,406231    |
| 272 | VT11B_MOUSE | Vti1b    | Vesicle transport through interaction with t-SNAREs homolog 1B | 1,98611   | 0,552102    |
| 273 | PAPS2_MOUSE | Papss2   | Bifunctional 3'-phosphoadenosine 5'-phosphosulfate synthase 2  | 0,325289  | -0,226628   |
| 274 | KLC1_MOUSE  | Klc1     | Kinesin light chain 1                                          | 0,509257  | 0,398492    |
| 275 | RDH7_MOUSE  | Rdh7     | Retinol dehydrogenase 7                                        | 0,245568  | 0,107156    |
| 276 | CPNS1_MOUSE | Capns1   | Calpain small subunit 1                                        | 0,300015  | -0,249646   |
| 277 | DC1I2_MOUSE | Dync1i2  | Cytoplasmic dynein 1 intermediate chain 2                      | 0,678128  | 0,460245    |
| 278 | PPT1_MOUSE  | Ppt1     | Palmitoyl-protein thioesterase 1                               | 0,186044  | 0,136077    |
| 279 | ZFR_MOUSE   | Zfr      | Zinc finger RNA-binding protein                                | 0,594322  | 0,236528    |
| 280 | DDC_MOUSE   | Ddc      | Aromatic-L-amino-acid decarboxylase                            | 0,730191  | 0,344307    |
| 281 | CSN3_MOUSE  | Cops3    | COP9 signalosome complex subunit 3                             | 0,749668  | -0,178307   |
| 282 | CSN4_MOUSE  | Cops4    | COP9 signalosome complex subunit 4                             | 0,511797  | 0,192035    |
| 283 | CSN6_MOUSE  | Cops6    | COP9 signalosome complex subunit 6                             | 0,349896  | -0,262082   |
| 284 | ROA2_MOUSE  | Hnmpa2b1 | Heterogeneous nuclear ribonucleoproteins A2/B1                 | 1,3231    | 0,549076    |
| 285 | COMT_MOUSE  | Comt     | Catechol O-methyltransferase                                   | 0,0123681 | 0,0185928   |
| 286 | BECN1_MOUSE | Becn1    | Beclin-1                                                       | 0,922562  | -0,591751   |
| 287 | CREG1_MOUSE | Creg1    | Protein CREG1                                                  | 0,297818  | 0,233323    |
| 288 | PRS6A_MOUSE | Psmc3    | 26S proteasome regulatory subunit 6A                           | 1,69661   | 0,323216    |
| 289 | CLPP_MOUSE  | Clpp     | ATP-dependent Clp protease proteolytic subunit, mitochondrial  | 0,859392  | 0,37013     |
| 290 | CTBP1_MOUSE | Ctbp1    | C-terminal-binding protein 1                                   | 0,544221  | 0,14812     |
| 291 | MAP7_MOUSE  | Map7     | Enscosin                                                       | 1,28186   | 0,333576    |
| 292 | BIRC6_MOUSE | Birc6    | Baculoviral IAP repeat-containing protein 6                    | 1,9307    | 0,570615    |
| 293 | TOM1_MOUSE  | Tom1     | Target of Myb protein 1                                        | 0,704129  | 0,453687    |
| 294 | FA5_MOUSE   | F5       | Coagulation factor V                                           | 0,160899  | 0,145419    |
| 295 | STAM2_MOUSE | Stam2    | Signal transducing adapter molecule 2                          | 0,870311  | -1,06877    |
| 296 | CP4AA_MOUSE | Cyp4a10  | Cytochrome P450 4A10                                           | 0,0305973 | 0,0482555   |
| 297 | IDHC_MOUSE  | Idh1     | Isocitrate dehydrogenase [NADP] cytoplasmic                    | 1,51754   | 1,41566     |
| 298 | AKA10_MOUSE | Akap10   | A-kinase anchor protein 10, mitochondrial                      | 0,75502   | 0,738417    |
| 299 | DHRS3_MOUSE | Dhrs3    | Short-chain dehydrogenase/reductase 3                          | 0,333034  | 0,258724    |
| 300 | SOAT2_MOUSE | Soat2    | Sterol O-acyltransferase 2                                     | 0,068544  | -0,0522312  |
| 301 | FA10_MOUSE  | F10      | Coagulation factor X                                           | 0,0122332 | -0,00927505 |
| 302 | LIN7C_MOUSE | Lin7c    | Protein lin-7 homolog C                                        | 1,15428   | 0,411602    |
| 303 | GNP11_MOUSE | Gnpda1   | Glucosamine-6-phosphate isomerase 1                            | 0,144861  | -0,170126   |
| 304 | CP8B1_MOUSE | Cyp8b1   | 7-alpha-hydroxycholest-4-en-3-one 12-alpha-hydroxylase         | 0,761419  | 0,426362    |
| 305 | YME11_MOUSE | Yme11    | ATP-dependent zinc metalloprotease YME1L1                      | 0,0512781 | -0,0129868  |
| 306 | KBL_MOUSE   | Gcat     | 2-amino-3-ketobutyrate coenzyme A ligase, mitochondrial        | 0,234272  | -0,0861458  |
| 307 | CBPD_MOUSE  | Cpd      | Carboxypeptidase D                                             | 0,860177  | 0,315047    |

|     |             |        |                                                                  |            |            |
|-----|-------------|--------|------------------------------------------------------------------|------------|------------|
| 308 | LGMN_MOUSE  | Lgmn   | Legumain                                                         | 0,00635797 | 0,00311203 |
| 309 | AFAM_MOUSE  | Afm    | Afamin                                                           | 0,520211   | 0,44669    |
| 310 | COR1A_MOUSE | Coro1a | Coronin-1A                                                       | 1,07286    | 0,568177   |
| 311 | COPE_MOUSE  | Cope   | Coatomer subunit epsilon                                         | 1,76981    | 0,584388   |
| 312 | RBM3_MOUSE  | Rbm3   | RNA-binding protein 3                                            | 0,0168756  | 0,0100666  |
| 313 | SP1_MOUSE   | Sp1    | Transcription factor Sp1                                         | 1,16813    | 0,777503   |
| 314 | FHIT_MOUSE  | Fhit   | Bis(5'-adenosyl)-triphosphatase                                  | 1,12442    | -0,387112  |
| 315 | CASP8_MOUSE | Casp8  | Caspase-8                                                        | 2,14758    | 0,71021    |
| 316 | CP1A2_MOUSE | Cyp1a2 | Cytochrome P450 1A2                                              | 0,730604   | -0,977103  |
| 317 | ADH1_MOUSE  | Adh1   | Alcohol dehydrogenase 1                                          | 0,791585   | -0,343983  |
| 318 | DYR_MOUSE   | Dhfr   | Dihydrofolate reductase                                          | 0,405738   | 0,455161   |
| 319 | COX2_MOUSE  | Mtco2  | Cytochrome c oxidase subunit 2                                   | 1,18022    | -0,512659  |
| 320 | HPRT_MOUSE  | Hprt1  | Hypoxanthine-guanine phosphoribosyltransferase                   | 1,37514    | 0,363833   |
| 321 | CAH2_MOUSE  | Ca2    | Carbonic anhydrase 2                                             | 0,0535996  | -0,0527161 |
| 322 | CO3_MOUSE   | C3     | Complement C3                                                    | 0,193978   | 0,204689   |
| 323 | CO4B_MOUSE  | C4b    | Complement C4-B                                                  | 1,15343    | 0,485162   |
| 324 | B2MG_MOUSE  | B2m    | Beta-2-microglobulin                                             | 0,781282   | 0,831074   |
| 325 | HA10_MOUSE  | H2-Q10 | H-2 class I histocompatibility antigen, Q10 alpha chain          | 0,237568   | 0,300004   |
| 326 | HA11_MOUSE  | H2-D1  | H-2 class I histocompatibility antigen, D-B alpha chain          | 0,0611498  | -0,0550507 |
| 327 | HA1B_MOUSE  | H2-K1  | H-2 class I histocompatibility antigen, K-B alpha chain          | 0,669757   | 0,411671   |
| 328 | HBA_MOUSE   | Hba    | Hemoglobin subunit alpha                                         | 0,605001   | -0,334325  |
| 329 | HBB1_MOUSE  | Hbb-b1 | Hemoglobin subunit beta-1                                        | 1,03589    | -0,885406  |
| 330 | CO4A1_MOUSE | Col4a1 | Collagen alpha-1(IV) chain                                       | 0,285399   | -0,24525   |
| 331 | LAMC1_MOUSE | Lamc1  | Laminin subunit gamma-1                                          | 0,314731   | -0,186521  |
| 332 | LAMB1_MOUSE | Lamb1  | Laminin subunit beta-1                                           | 0,792183   | -0,420607  |
| 333 | ATP8_MOUSE  | Mtatp8 | ATP synthase protein 8                                           | 0,797817   | -0,599809  |
| 334 | ADA_MOUSE   | Ada    | Adenosine deaminase                                              | 0,517204   | -0,316713  |
| 335 | FABP4_MOUSE | Fabp4  | Fatty acid-binding protein, adipocyte                            | 0,575208   | 0,392391   |
| 336 | CFAB_MOUSE  | Cfb    | Complement factor B                                              | 1,88702    | 0,715646   |
| 337 | MYG_MOUSE   | Mb     | Myoglobin                                                        | 0,206218   | -0,601238  |
| 338 | ARAF_MOUSE  | Araf   | Serine/threonine-protein kinase A-Raf                            | 0,465792   | 0,163539   |
| 339 | B3AT_MOUSE  | Slc4a1 | Band 3 anion transport protein                                   | 0,183211   | 0,158434   |
| 340 | ALDOC_MOUSE | Aldoc  | Fructose-bisphosphate aldolase C                                 | 0,082255   | 0,0956272  |
| 341 | ALDOA_MOUSE | Aldoa  | Fructose-bisphosphate aldolase A                                 | 0,0974963  | 0,104233   |
| 342 | KAPCA_MOUSE | Prkaca | cAMP-dependent protein kinase catalytic subunit alpha            | 0,0447888  | -0,0290707 |
| 343 | AATC_MOUSE  | Got1   | Aspartate aminotransferase, cytoplasmic                          | 1,06194    | -0,416196  |
| 344 | AATM_MOUSE  | Got2   | Aspartate aminotransferase, mitochondrial                        | 0,292087   | 0,0975868  |
| 345 | K1C18_MOUSE | Krt18  | Keratin, type I cytoskeletal 18                                  | 0,364459   | -0,584444  |
| 346 | LDHA_MOUSE  | Ldha   | L-lactate dehydrogenase A chain                                  | 0,128175   | 0,129628   |
| 347 | CO5_MOUSE   | C5     | Complement C5                                                    | 0,0823178  | -0,17929   |
| 348 | APOA4_MOUSE | Apoa4  | Apolipoprotein A-IV                                              | 1,79801    | 1,53501    |
| 349 | G6PI_MOUSE  | Gpi    | Glucose-6-phosphate isomerase                                    | 0,514073   | 0,337784   |
| 350 | CATL1_MOUSE | Ctsl   | Cathepsin L1                                                     | 0,473744   | -0,403151  |
| 351 | MAOX_MOUSE  | Me1    | NADP-dependent malic enzyme                                      | 1,50148    | 1,36618    |
| 352 | ENPP1_MOUSE | Enpp1  | Ectonucleotide pyrophosphatase/phosphodiesterase family member 1 | 0,487132   | -0,473989  |
| 353 | CFAH_MOUSE  | Cfh    | Complement factor H                                              | 0,991557   | 0,462323   |
| 354 | SPRC_MOUSE  | Sparc  | SPARC                                                            | 0,744061   | -0,862325  |
| 355 | TTHY_MOUSE  | Ttr    | Transthyretin                                                    | 0,217941   | 0,191072   |
| 356 | KCRM_MOUSE  | Ckm    | Creatine kinase M-type                                           | 0,343307   | -0,899456  |
| 357 | ANXA2_MOUSE | Anxa2  | Annexin A2                                                       | 0,366808   | -0,243013  |
| 358 | ALBU_MOUSE  | Alb    | Serum albumin                                                    | 0,30532    | 0,277277   |
| 359 | RIR1_MOUSE  | Rrm1   | Ribonucleoside-diphosphate reductase large subunit               | 0,740999   | 0,37032    |

|     |                                  |           |                                                             |           |            |
|-----|----------------------------------|-----------|-------------------------------------------------------------|-----------|------------|
| 360 | A1AT1_MOUSE                      | Serpina1a | Alpha-1-antitrypsin 1-1                                     | 0,312975  | 0,223091   |
| 361 | HS90A_MOUSE                      | Hsp90aa1  | Heat shock protein HSP 90-alpha                             | 0,804188  | 0,320671   |
| 362 | PDIA4_MOUSE                      | Pdia4     | Protein disulfide-isomerase A4                              | 4,16185   | 0,688692   |
| 363 | SPTA1_MOUSE                      | Spta1     | Spectrin alpha chain, erythrocytic 1                        | 0,0354505 | 0,0313622  |
| 364 | ENPL_MOUSE                       | Hsp90b1   | Endoplasmic                                                 | 0,455929  | 0,243634   |
| 365 | APOE_MOUSE                       | ApoE      | Apolipoprotein E                                            | 1,35214   | 0,76574    |
| 366 | SODC_MOUSE                       | Sod1      | Superoxide dismutase [Cu-Zn]                                | 0,489855  | 0,177618   |
| 367 | MDHM_MOUSE                       | Mdh2      | Malate dehydrogenase, mitochondrial                         | 0,645442  | -0,179473  |
| 368 | C4BPA_MOUSE                      | C4bpa     | C4b-binding protein                                         | 1,17321   | 0,486435   |
| 369 | GNAI2_MOUSE                      | Gnai2     | Guanine nucleotide-binding protein G(i) subunit alpha-2     | 0,264746  | -0,146893  |
| 370 | RPB1_MOUSE                       | Polr2a    | DNA-directed RNA polymerase II subunit RPB1                 | 0,442213  | 0,287287   |
| 371 | ITB1_MOUSE                       | Itgb1     | Integrin beta-1                                             | 0,615055  | 0,203053   |
| 372 | PDIA1_MOUSE                      | P4hb      | Protein disulfide-isomerase                                 | 1,23657   | 0,491418   |
| 373 | NUCL_MOUSE                       | Ncl       | Nucleolin                                                   | 0,183209  | -0,0824104 |
| 374 | PGK1_MOUSE                       | Pgk1      | Phosphoglycerate kinase 1                                   | 0,0485321 | 0,062534   |
| 375 | FRIH_MOUSE                       | Fth1      | Ferritin heavy chain                                        | 0,31342   | 0,5626     |
| 376 | CSF1R_MOUSE                      | Csf1r     | Macrophage colony-stimulating factor 1 receptor             | 1,4056    | 0,373219   |
| 377 | SODM_MOUSE                       | Sod2      | Superoxide dismutase [Mn], mitochondrial                    | 0,031238  | -0,0247768 |
| 378 | CADH1_MOUSE                      | Cdh1      | Cadherin-1                                                  | 0,0912819 | 0,0783531  |
| 379 | APOA2_MOUSE                      | Apoa2     | Apolipoprotein A-II                                         | 0,128508  | 0,113832   |
| 380 | SURF1_MOUSE                      | Surf1     | Surfeit locus protein 1                                     | 0,233689  | -0,194342  |
| 381 | H2AV_MOUSE;H2A2;H2afv;H2afz      |           | Histone H2A.Z                                               | 0,0164103 | 0,00753899 |
| 382 | KGP1_MOUSE                       | Prkg1     | cGMP-dependent protein kinase 1                             | 0,329169  | 0,154096   |
| 383 | DERPC_MOUSE                      | Derpc     | Decreased expression in renal and prostate cancer protein   | 1,28961   | 1,29632    |
| 384 | NDUB1_MOUSE                      | Ndufb1    | NADH dehydrogenase [ubiquinone] 1 beta subcomplex subunit 1 | 0,349192  | 0,130403   |
| 385 | IFI4_MOUSE                       | Ifi204    | Interferon-activable protein 204                            | 0,499879  | 0,396895   |
| 386 | CALM1_MOUSE;CA1;Calm1;Calm2;Ca   |           | Calmodulin-1                                                | 0,404625  | -0,4207    |
| 387 | ANXA1_MOUSE                      | Anxa1     | Annexin A1                                                  | 0,599063  | 0,34142    |
| 388 | EF1A1_MOUSE                      | Eef1a1    | Elongation factor 1-alpha 1                                 | 0,103157  | 0,145184   |
| 389 | ENV1_MOUSE                       |           | MLV-related proviral Env polyprotein                        | 1,81222   | 1,50723    |
| 390 | NID1_MOUSE                       | Nid1      | Nidogen-1                                                   | 0,202503  | 0,171417   |
| 391 | HEM2_MOUSE                       | Alad      | Delta-aminolevulinic acid dehydratase                       | 0,346017  | 0,424314   |
| 392 | CATB_MOUSE                       | Ctsb      | Cathepsin B                                                 | 0,129506  | -0,0548973 |
| 393 | IF4A2_MOUSE                      | Eif4a2    | Eukaryotic initiation factor 4A-II                          | 0,936613  | -1,28363   |
| 394 | THIO_MOUSE                       | Txn       | Thioredoxin                                                 | 0,521592  | 0,161278   |
| 395 | GSTA2_MOUSE                      | Gsta2     | Glutathione S-transferase A2                                | 0,765281  | -0,998146  |
| 396 | GSTM1_MOUSE                      | Gstm1     | Glutathione S-transferase Mu 1                              | 0,0667977 | 0,0876278  |
| 397 | TCEA1_MOUSE                      | Tcea1     | Transcription elongation factor A protein 1                 | 0,835724  | 0,271922   |
| 398 | 4F2_MOUSE                        | Slc3a2    | 4F2 cell-surface antigen heavy chain                        | 1,63348   | 0,643377   |
| 399 | H2B1C_MOUSE;H2f;Hist1h2bc;Hist1h |           | Histone H2B type 1-M                                        | 0,194028  | 0,793594   |
| 400 | H10_MOUSE                        | H1f0      | Histone H1.0                                                | 0,831333  | -0,178568  |
| 401 | TCP4_MOUSE                       | Sub1      | Activated RNA polymerase II transcriptional coactivator p15 | 0,429201  | -0,328524  |
| 402 | GRAA_MOUSE                       | Gzma      | Granzyme A                                                  | 1,52002   | -0,858032  |
| 403 | CO1A1_MOUSE                      | Col1a1    | Collagen alpha-1(I) chain                                   | 0,339001  | 0,579707   |
| 404 | PARP1_MOUSE                      | Parp1     | Poly [ADP-ribose] polymerase 1                              | 0,663798  | -0,541944  |
| 405 | LIPL_MOUSE                       | Lpl       | Lipoprotein lipase                                          | 0,744061  | 0,678962   |
| 406 | FINC_MOUSE                       | Fn1       | Fibronectin                                                 | 0,456311  | 0,320708   |
| 407 | GPX1_MOUSE                       | Gpx1      | Glutathione peroxidase 1                                    | 0,331326  | -0,198779  |
| 408 | FABPH_MOUSE                      | Fabp3     | Fatty acid-binding protein, heart                           | 0,335191  | -1,7118    |
| 409 | LAMP1_MOUSE                      | Lamp1     | Lysosome-associated membrane glycoprotein 1                 | 0,438359  | 0,22222    |
| 410 | HS90B_MOUSE                      | Hsp90ab1  | Heat shock protein HSP 90-beta                              | 0,412448  | 0,185541   |
| 411 | DMD_MOUSE                        | Dmd       | Dystrophin                                                  | 0,297751  | 0,071957   |

|     |             |          |                                                                   |           |            |
|-----|-------------|----------|-------------------------------------------------------------------|-----------|------------|
| 412 | CD1D1_MOUSE | Cd1d1    | Antigen-presenting glycoprotein CD1d1                             | 0,18799   | 0,133424   |
| 413 | K2C8_MOUSE  | Krt8     | Keratin, type II cytoskeletal 8                                   | 2,27559   | -0,439433  |
| 414 | PROP_MOUSE  | Cfp      | Properdin                                                         | 1,13538   | 0,735957   |
| 415 | ITA5_MOUSE  | Itga5    | Integrin alpha-5                                                  | 1,98587   | 0,601036   |
| 416 | CP2D9_MOUSE | Cyp2d9   | Cytochrome P450 2D9                                               | 0,286314  | -0,725552  |
| 417 | OTC_MOUSE   | Otc      | Ornithine carbamoyltransferase, mitochondrial                     | 0,0455344 | -0,0269707 |
| 418 | ITB2_MOUSE  | Itgb2    | Integrin beta-2                                                   | 0,368947  | 0,262451   |
| 419 | GAS2_MOUSE  | Gas2     | Growth arrest-specific protein 2                                  | 0,079741  | 0,144096   |
| 420 | ITPR1_MOUSE | Itpr1    | Inositol 1,4,5-trisphosphate receptor type 1                      | 0,816051  | 0,548442   |
| 421 | NUD19_MOUSE | Nudt19   | Nucleoside diphosphate-linked moiety X motif 19                   | 0,97686   | 0,586165   |
| 422 | TCPA_MOUSE  | Tcp1     | T-complex protein 1 subunit alpha                                 | 0,93084   | 0,445995   |
| 423 | SAMP_MOUSE  | Apcs     | Serum amyloid P-component                                         | 0,498102  | -0,781419  |
| 424 | BGLR_MOUSE  | Gusb     | Beta-glucuronidase                                                | 0,51694   | -0,808931  |
| 425 | KAP2_MOUSE  | Prkar2a  | cAMP-dependent protein kinase type II-alpha regulatory subunit    | 0,487053  | 0,420385   |
| 426 | PFKAL_MOUSE | Pfkf     | ATP-dependent 6-phosphofructokinase, liver type                   | 1,12228   | -0,336861  |
| 427 | FABPL_MOUSE | Fabp1    | Fatty acid-binding protein, liver                                 | 2,17476   | 0,631281   |
| 428 | COX5A_MOUSE | Cox5a    | Cytochrome c oxidase subunit 5A, mitochondrial                    | 0,247224  | 0,172781   |
| 429 | CP2B9_MOUSE | Cyp2b9   | Cytochrome P450 2B9                                               | 0,898269  | -0,646226  |
| 430 | PDCD6_MOUSE | Pdcd6    | Programmed cell death protein 6                                   | 0,870654  | -1,08286   |
| 431 | RL7A_MOUSE  | Rpl7a    | 60S ribosomal protein L7a                                         | 0,859084  | -0,715966  |
| 432 | GELS_MOUSE  | Gsn      | Gelsolin                                                          | 0,0451445 | 0,055798   |
| 433 | UMPS_MOUSE  | Umps     | Uridine 5'-monophosphate synthase                                 | 0,129311  | 0,0920895  |
| 434 | ICAM1_MOUSE | Icam1    | Intercellular adhesion molecule 1                                 | 0,0221127 | -0,025132  |
| 435 | CAH1_MOUSE  | Ca1      | Carbonic anhydrase 1                                              | 0,303243  | -0,307631  |
| 436 | GPDA_MOUSE  | Gpd1     | Glycerol-3-phosphate dehydrogenase [NAD(+)], cytoplasmic          | 0,372603  | -0,265236  |
| 437 | AT1B1_MOUSE | Atp1b1   | Sodium/potassium-transporting ATPase subunit beta-1               | 0,857671  | -0,636382  |
| 438 | RL27A_MOUSE | Rpl27a   | 60S ribosomal protein L27a                                        | 0,593873  | 0,136023   |
| 439 | RS16_MOUSE  | Rps16    | 40S ribosomal protein S16                                         | 0,796152  | 0,426965   |
| 440 | RL7_MOUSE   | Rpl7     | 60S ribosomal protein L7                                          | 0,482616  | 0,331941   |
| 441 | MDHC_MOUSE  | Mdh1     | Malate dehydrogenase, cytoplasmic                                 | 0,27069   | -0,275351  |
| 442 | RSSA_MOUSE  | Rpsa     | 40S ribosomal protein SA                                          | 0,0855767 | 0,0663097  |
| 443 | CALR_MOUSE  | Cair     | Calreticulin                                                      | 0,472721  | 0,186427   |
| 444 | GTR2_MOUSE  | Slc2a2   | Solute carrier family 2, facilitated glucose transporter member 2 | 0,250491  | -0,309864  |
| 445 | SRP54_MOUSE | Srp54    | Signal recognition particle 54 kDa protein                        | 1,51258   | 0,460307   |
| 446 | PSMD3_MOUSE | Psmd3    | 26S proteasome non-ATPase regulatory subunit 3                    | 0,477202  | -0,295277  |
| 447 | LMNB1_MOUSE | Lmnb1    | Lamin-B1                                                          | 0,172894  | -0,0878059 |
| 448 | ANXA6_MOUSE | Anxa6    | Annexin A6                                                        | 0,360702  | 0,243259   |
| 449 | RLA0_MOUSE  | Rplp0    | 60S acidic ribosomal protein P0                                   | 0,143234  | -0,0447327 |
| 450 | HMOX1_MOUSE | Hmox1    | Heme oxygenase 1                                                  | 1,29359   | 0,71044    |
| 451 | GLNA_MOUSE  | Glul     | Glutamine synthetase                                              | 0,293575  | 0,405193   |
| 452 | CADH2_MOUSE | Cdh2     | Cadherin-2                                                        | 0,249613  | -0,0984657 |
| 453 | INSR_MOUSE  | Insr     | Insulin receptor                                                  | 1,43883   | -0,664775  |
| 454 | REL_MOUSE   | Rel      | Proto-oncogene c-Rel                                              | 0,594978  | 0,357901   |
| 455 | PMGE_MOUSE  | Bpgm     | Bisphosphoglycerate mutase                                        | 0,189214  | 0,195515   |
| 456 | CD44_MOUSE  | Cd44     | CD44 antigen                                                      | 2,08344   | 2,36966    |
| 457 | CP2A4_MOUSE | Cyp2a4   | Cytochrome P450 2A4                                               | 0,0344538 | 0,0397934  |
| 458 | SPTB1_MOUSE | Sptb     | Spectrin beta chain, erythrocytic                                 | 0,395018  | 0,398886   |
| 459 | NDKA_MOUSE  | Nme1     | Nucleoside diphosphate kinase A                                   | 0,413094  | -0,341826  |
| 460 | GSTM2_MOUSE | Gstm2    | Glutathione S-transferase Mu 2                                    | 0,391772  | -0,611282  |
| 461 | H12_MOUSE   | Hist1h1c | Histone H1.2                                                      | 0,228449  | 0,178421   |
| 462 | CAH3_MOUSE  | Ca3      | Carbonic anhydrase 3                                              | 1,52666   | 0,855269   |
| 463 | LEG1_MOUSE  | Lgals1   | Galectin-1                                                        | 1,28523   | -0,700853  |



|     |                               |          |                                                         |            |            |
|-----|-------------------------------|----------|---------------------------------------------------------|------------|------------|
| 464 | MET_MOUSE                     | Met      | Hepatocyte growth factor receptor                       | 1,02599    | -0,304887  |
| 465 | LDHB_MOUSE                    | Ldhib    | L-lactate dehydrogenase B chain                         | 0,796636   | -0,989117  |
| 466 | SRP14_MOUSE                   | Srp14    | Signal recognition particle 14 kDa protein              | 1,68508    | 0,32029    |
| 467 | CN37_MOUSE                    | Cnnp     | 2',3'-cyclic-nucleotide 3'-phosphodiesterase            | 0,314089   | 0,411969   |
| 468 | PH4H_MOUSE                    | Pah      | Phenylalanine-4-hydroxylase                             | 0,0822138  | -0,0764763 |
| 469 | MUTA_MOUSE                    | Mmut     | Methylmalonyl-CoA mutase, mitochondrial                 | 2,0952     | -0,497775  |
| 470 | AMPE_MOUSE                    | Enpep    | Glutamyl aminopeptidase                                 | 0,753343   | -0,495048  |
| 471 | ASSY_MOUSE                    | Ass1     | Argininosuccinate synthase                              | 0,762687   | -0,801434  |
| 472 | SPTN1_MOUSE                   | Sptan1   | Spectrin alpha chain, non-erythrocytic 1                | 0,414277   | 0,244096   |
| 473 | PPGB_MOUSE                    | Ctsa     | Lysosomal protective protein                            | 0,48871    | 0,35078    |
| 474 | G3P_MOUSE                     | Gapdh    | Glyceraldehyde-3-phosphate dehydrogenase                | 0,106863   | 0,199353   |
| 475 | LAMP2_MOUSE                   | Lamp2    | Lysosome-associated membrane glycoprotein 2             | 0,951957   | -0,59334   |
| 476 | ENOA_MOUSE                    | Eno1     | Alpha-enolase                                           | 1,71215    | 1,12418    |
| 477 | PTBP1_MOUSE                   | Ptbp1    | Polypyrimidine tract-binding protein 1                  | 0,299631   | 0,245593   |
| 478 | AP2A1_MOUSE                   | Ap2a1    | AP-2 complex subunit alpha-1                            | 0,597408   | 0,454369   |
| 479 | AP2A2_MOUSE                   | Ap2a2    | AP-2 complex subunit alpha-2                            | 2,38656    | 0,455393   |
| 480 | SBP1_MOUSE                    | Selenbp1 | Methanethiol oxidase                                    | 0,789007   | -0,521093  |
| 481 | COX7C_MOUSE                   | Cox7c    | Cytochrome c oxidase subunit 7C, mitochondrial          | 1,3135     | -0,693682  |
| 482 | HXK1_MOUSE                    | Hk1      | Hexokinase-1                                            | 0,22724    | 0,261738   |
| 483 | UDB17_MOUSE                   | Ugt2b17  | UDP-glucuronosyltransferase 2B17                        | 0,644155   | 0,391264   |
| 484 | PPIA_MOUSE                    | Ppia     | Peptidyl-prolyl cis-trans isomerase A                   | 0,638641   | 0,144875   |
| 485 | TPIS_MOUSE                    | Tpi1     | Triosephosphate isomerase                               | 0,686805   | -0,134504  |
| 486 | HS71A_MOUSE;HS; Hspa1a;Hspa1b |          | Heat shock 70 kDa protein 1B                            | 2,54955    | 0,586753   |
| 487 | PCNA_MOUSE                    | Pcna     | Proliferating cell nuclear antigen                      | 0,740786   | 0,447347   |
| 488 | CATD_MOUSE                    | Ctsd     | Cathepsin D                                             | 1,25336    | 0,493399   |
| 489 | BASI_MOUSE                    | Bsg      | Basigin                                                 | 0,307283   | 0,23465    |
| 490 | KS6A3_MOUSE                   | Rps6ka3  | Ribosomal protein S6 kinase alpha-3                     | 0,338644   | 0,111446   |
| 491 | COF1_MOUSE                    | Cfi1     | Cofilin-1                                               | 1,30018    | 0,550194   |
| 492 | K1C19_MOUSE                   | Krt19    | Keratin, type I cytoskeletal 19                         | 0,342502   | -0,231685  |
| 493 | FAS_MOUSE                     | Fasn     | Fatty acid synthase                                     | 0,00111809 | 0,00227318 |
| 494 | GSTP1_MOUSE                   | Gstp1    | Glutathione S-transferase P 1                           | 0,659962   | 1,05631    |
| 495 | THRB_MOUSE                    | F2       | Prothrombin                                             | 0,71439    | 0,229208   |
| 496 | RL13A_MOUSE                   | Rpl13a   | 60S ribosomal protein L13a                              | 0,204342   | 0,109268   |
| 497 | SERPH_MOUSE                   | Serpinh1 | Serpin H1                                               | 0,294222   | -0,252639  |
| 498 | COX5B_MOUSE                   | Cox5b    | Cytochrome c oxidase subunit 5B, mitochondrial          | 0,612838   | -0,216396  |
| 499 | GSTM3_MOUSE                   | Gstm3    | Glutathione S-transferase Mu 3                          | 0,349192   | -0,483163  |
| 500 | COX41_MOUSE                   | Cox4i1   | Cytochrome c oxidase subunit 4 isoform 1, mitochondrial | 1,66774    | 1,16518    |
| 501 | LSP1_MOUSE                    | Lsp1     | Lymphocyte-specific protein 1                           | 0,856715   | 0,400934   |
| 502 | BIP_MOUSE                     | Hspa5    | Endoplasmic reticulum chaperone BiP                     | 0,658072   | 0,283416   |
| 503 | HEXB_MOUSE                    | Hexb     | Beta-hexosaminidase subunit beta                        | 0,230887   | 0,256398   |
| 504 | TYB4_MOUSE                    | Tmsb4x   | Thymosin beta-4                                         | 0,450846   | -0,734558  |
| 505 | PRDX3_MOUSE                   | Prdx3    | Thioredoxin-dependent peroxide reductase, mitochondrial | 0,0619792  | -0,0431614 |
| 506 | VIME_MOUSE                    | Vim      | Vimentin                                                | 0,0571225  | 0,0741913  |
| 507 | CP2A5_MOUSE                   | Cyp2a5   | Cytochrome P450 2A5                                     | 0,958019   | -0,977493  |
| 508 | PLMN_MOUSE                    | Plg      | Plasminogen                                             | 0,995804   | 0,250274   |
| 509 | TPM3_MOUSE                    | Tpm3     | Tropomyosin alpha-3 chain                               | 1,23519    | 0,490975   |
| 510 | UBL4A_MOUSE                   | Ubl4a    | Ubiquitin-like protein 4A                               | 0,818863   | 0,288529   |
| 511 | MYO5B_MOUSE                   | Myo5b    | Unconventional myosin-Vb                                | 0,586512   | -0,451186  |
| 512 | GNA11_MOUSE                   | Gna11    | Guanine nucleotide-binding protein subunit alpha-11     | 0,480032   | -0,372295  |
| 513 | GNAQ_MOUSE                    | Gnaq     | Guanine nucleotide-binding protein G(q) subunit alpha   | 0,162967   | 0,166125   |
| 514 | ALD1_MOUSE                    | Akr1b7   | Aldo-keto reductase family 1 member B7                  | 1,33888    | -0,805934  |
| 515 | MDR3_MOUSE                    | Abcb4    | Phosphatidylcholine translocator ABCB4                  | 0,541101   | 0,199294   |

|     |             |           |                                                                  |            |            |
|-----|-------------|-----------|------------------------------------------------------------------|------------|------------|
| 516 | ENOB_MOUSE  | Eno3      | Beta-enolase                                                     | 0,23344    | -0,590524  |
| 517 | ANGI_MOUSE  | Ang       | Angiogenin                                                       | 0,173994   | 0,301687   |
| 518 | VTDB_MOUSE  | Gc        | Vitamin D-binding protein                                        | 0,983941   | 0,587824   |
| 519 | LMNB2_MOUSE | Lmn2      | Lamin-B2                                                         | 0,107962   | -0,0796669 |
| 520 | TGM2_MOUSE  | Tgm2      | Protein-glutamine gamma-glutamyltransferase 2                    | 0,469978   | 0,295403   |
| 521 | HEMH_MOUSE  | Fech      | Ferrochelatase, mitochondrial                                    | 0,935131   | 0,498508   |
| 522 | MYD88_MOUSE | Myd88     | Myeloid differentiation primary response protein MyD88           | 0,724168   | 0,698199   |
| 523 | PGH1_MOUSE  | Ptgs1     | Prostaglandin G/H synthase 1                                     | 0,326805   | 0,153155   |
| 524 | A1AT2_MOUSE | Serpina1b | Alpha-1-antitrypsin 1-2                                          | 0,57066    | -0,601443  |
| 525 | AP1G1_MOUSE | Ap1g1     | AP-1 complex subunit gamma-1                                     | 0,426324   | -0,432601  |
| 526 | HEM3_MOUSE  | Hmbs      | Porphobilinogen deaminase                                        | 0,722536   | 0,553481   |
| 527 | EIF3A_MOUSE | Eif3a     | Eukaryotic translation initiation factor 3 subunit A             | 1,88251    | 0,294622   |
| 528 | CBX3_MOUSE  | Cbx3      | Chromobox protein homolog 3                                      | 0,371172   | 0,121444   |
| 529 | MOV10_MOUSE | Mov10     | Putative helicase MOV-10                                         | 0,0236367  | 0,021796   |
| 530 | XRCC6_MOUSE | Xrcc6     | X-ray repair cross-complementing protein 6                       | 0,0448325  | -0,100252  |
| 531 | PNPH_MOUSE  | Pnp       | Purine nucleoside phosphorylase                                  | 1,04722    | -0,74254   |
| 532 | PIMT_MOUSE  | Pcm1      | Protein-L-isoaspartate(D-aspartate) O-methyltransferase          | 0,606323   | 0,337132   |
| 533 | CAH5A_MOUSE | Ca5a      | Carbonic anhydrase 5A, mitochondrial                             | 0,145159   | -0,0947678 |
| 534 | FCL_MOUSE   | Tsta3     | GDP-L-fucose synthase                                            | 0,899905   | 0,626199   |
| 535 | BGAL_MOUSE  | Glb1      | Beta-galactosidase                                               | 0,972293   | -0,391734  |
| 536 | TCEA3_MOUSE | Tcea3     | Transcription elongation factor A protein 3                      | 0,708712   | 0,70404    |
| 537 | TISB_MOUSE  | Zfp36l1   | mRNA decay activator protein ZFP36L1                             | 0,919025   | -0,902974  |
| 538 | EST1C_MOUSE | Ces1c     | Carboxylesterase 1C                                              | 0,335395   | -0,276857  |
| 539 | CATA_MOUSE  | Cat       | Catalase                                                         | 1,96554    | 0,184806   |
| 540 | PPIB_MOUSE  | Ppib      | Peptidyl-prolyl cis-trans isomerase B                            | 1,43089    | 0,368091   |
| 541 | CAPG_MOUSE  | Capg      | Macrophage-capping protein                                       | 0,0343255  | -0,0637749 |
| 542 | CP2DA_MOUSE | Cyp2d10   | Cytochrome P450 2D10                                             | 0,189718   | -0,127562  |
| 543 | GSTA4_MOUSE | Gsta4     | Glutathione S-transferase A4                                     | 1,22292    | -0,525446  |
| 544 | LKHA4_MOUSE | Lta4h     | Leukotriene A-4 hydrolase                                        | 0,148381   | 0,059581   |
| 545 | IMDH2_MOUSE | Impdh2    | Inosine-5'-monophosphate dehydrogenase 2                         | 0,72214    | 0,24768    |
| 546 | AL1A1_MOUSE | Aldh1a1   | Retinal dehydrogenase 1                                          | 1,24652    | 1,00063    |
| 547 | ASGR2_MOUSE | Asgr2     | Asialoglycoprotein receptor 2                                    | 0,506536   | -1,13302   |
| 548 | CD11B_MOUSE | Cdk11b    | Cyclin-dependent kinase 11B                                      | 0,19692    | -0,10849   |
| 549 | 3BHS1_MOUSE | Hsd3b1    | 3 beta-hydroxysteroid dehydrogenase/Delta 5-->4-isomerase type 1 | 0,986788   | -1,20163   |
| 550 | MCM3_MOUSE  | Mcm3      | DNA replication licensing factor MCM3                            | 0,569278   | 0,517851   |
| 551 | CCND1_MOUSE | Ccnd1     | G1/S-specific cyclin-D1                                          | 2,46133    | 0,555096   |
| 552 | RS2_MOUSE   | Rps2      | 40S ribosomal protein S2                                         | 0,917719   | 0,441904   |
| 553 | URIC_MOUSE  | Uox       | Uricase                                                          | 0,575304   | -0,76055   |
| 554 | NFKB1_MOUSE | Nfkb1     | Nuclear factor NF-kappa-B p105 subunit                           | 0,00262303 | 0,00119286 |
| 555 | LYN_MOUSE   | Lyn       | Tyrosine-protein kinase Lyn                                      | 0,312073   | 0,285716   |
| 556 | UBF1_MOUSE  | Ubf1      | Nucleolar transcription factor 1                                 | 0,74428    | 0,213834   |
| 557 | TLN1_MOUSE  | Tln1      | Talin-1                                                          | 1,04338    | 0,377521   |
| 558 | EZRI_MOUSE  | Ezr       | Ezrin                                                            | 0,405091   | 0,185784   |
| 559 | MOES_MOUSE  | Msn       | Moesin                                                           | 0,794247   | 0,499309   |
| 560 | RADI_MOUSE  | Rdx       | Radixin                                                          | 0,180965   | -0,145327  |
| 561 | 3BHS3_MOUSE | Hsd3b3    | 3 beta-hydroxysteroid dehydrogenase/Delta 5-->4-isomerase type 3 | 0,253847   | -0,143249  |
| 562 | CTNA1_MOUSE | Ctnna1    | Catenin alpha-1                                                  | 0,0835405  | 0,0522667  |
| 563 | KLKB1_MOUSE | Klkb1     | Plasma kallikrein                                                | 1,07587    | 0,771715   |
| 564 | PTMA_MOUSE  | Ptma      | Prothymosin alpha                                                | 0,142798   | 0,131416   |
| 565 | U2AF2_MOUSE | U2af2     | Splicing factor U2AF 65 kDa subunit                              | 0,680817   | -0,362292  |
| 566 | DHE3_MOUSE  | Glud1     | Glutamate dehydrogenase 1, mitochondrial                         | 0,620755   | 0,15096    |
| 567 | P85A_MOUSE  | Pik3r1    | Phosphatidylinositol 3-kinase regulatory subunit alpha           | 0,267744   | -0,469772  |

|     |                |             |                                                                  |           |            |
|-----|----------------|-------------|------------------------------------------------------------------|-----------|------------|
| 568 | PSMD7_MOUSE    | Psmc7       | 26S proteasome non-ATPase regulatory subunit 7                   | 0,787251  | 0,190926   |
| 569 | SYSC_MOUSE     | Sars        | Serine--tRNA ligase, cytoplasmic                                 | 2,91396   | 0,418105   |
| 570 | S10A8_MOUSE    | S100a8      | Protein S100-A8                                                  | 1,50137   | 1,68392    |
| 571 | MA2A1_MOUSE    | Man2a1      | Alpha-mannosidase 2                                              | 0,745803  | 0,275576   |
| 572 | RSMB_MOUSE;RSM | Snrpb;Snrpn | Small nuclear ribonucleoprotein-associated protein B             | 0,500252  | 0,177144   |
| 573 | MAP4_MOUSE     | Map4        | Microtubule-associated protein 4                                 | 0,466337  | 0,243614   |
| 574 | GNA13_MOUSE    | Gna13       | Guanine nucleotide-binding protein subunit alpha-13              | 0,826205  | 0,251391   |
| 575 | PLAP_MOUSE     | Plaa        | Phospholipase A-2-activating protein                             | 0,394638  | 0,158889   |
| 576 | XRCC5_MOUSE    | Xroc5       | X-ray repair cross-complementing protein 5                       | 0,569314  | -0,360449  |
| 577 | RL3_MOUSE      | Rpl3        | 60S ribosomal protein L3                                         | 0,407279  | 0,370742   |
| 578 | H2AX_MOUSE     | H2afx       | Histone H2AX                                                     | 1,33846   | 0,322171   |
| 579 | PDI3_MOUSE     | Pdia3       | Protein disulfide-isomerase A3                                   | 1,76303   | 0,895212   |
| 580 | CP17A_MOUSE    | Cyp17a1     | Steroid 17-alpha-hydroxylase/17,20 lyase                         | 0,583135  | -0,500576  |
| 581 | MGAT1_MOUSE    | Mgat1       | Alpha-1,3-mannosyl-glycoprotein 2-beta-N-glucosaminyltransferase | 0,431583  | 0,240067   |
| 582 | CEBPB_MOUSE    | Cebpb       | CCAAT/enhancer-binding protein beta                              | 0,866563  | -0,621975  |
| 583 | PSB8_MOUSE     | Psmc8       | Proteasome subunit beta type-8                                   | 0,243876  | -0,29677   |
| 584 | CXB1_MOUSE     | Gjb1        | Gap junction beta-1 protein                                      | 1,78216   | -0,700304  |
| 585 | ACOC_MOUSE     | Aco1        | Cytoplasmic aconitate hydratase                                  | 0,395704  | 0,28431    |
| 586 | APEX1_MOUSE    | Apex1       | DNA-(apurinic or apyrimidinic site) lyase                        | 0,0683283 | 0,062524   |
| 587 | ADHX_MOUSE     | Adh5        | Alcohol dehydrogenase class-3                                    | 0,137818  | 0,0625732  |
| 588 | PURA1_MOUSE    | Adss1       | Adenylosuccinate synthetase isozyme 1                            | 0,0133174 | -0,0132568 |
| 589 | CAH8_MOUSE     | Ca8         | Carbonic anhydrase-related protein                               | 0,240437  | 0,15464    |
| 590 | PGS1_MOUSE     | Bgn         | Biglycan                                                         | 0,0221247 | 0,0167316  |
| 591 | PGS2_MOUSE     | Dcn         | Decorin                                                          | 0,290195  | -0,437787  |
| 592 | NP1L1_MOUSE    | Nap11       | Nucleosome assembly protein 1-like 1                             | 0,873198  | 0,259452   |
| 593 | ATX10_MOUSE    | Atxn10      | Ataxin-10                                                        | 1,00715   | -0,414239  |
| 594 | CELF1_MOUSE    | Celf1       | CUGBP Elav-like family member 1                                  | 0,237784  | 0,128151   |
| 595 | NCKP1_MOUSE    | Nckap1      | Nck-associated protein 1                                         | 0,881393  | -0,184591  |
| 596 | SEPT4_MOUSE    | Septin4     | Septin-4                                                         | 0,0104801 | 0,008741   |
| 597 | MUG1_MOUSE     | Mug1        | Murinoglobulin-1                                                 | 0,308597  | 0,308126   |
| 598 | MUG2_MOUSE     | Mug2        | Murinoglobulin-2                                                 | 2,84662   | 0,822369   |
| 599 | RXRA_MOUSE     | Rxra        | Retinoic acid receptor RXR-alpha                                 | 1,69935   | 0,209333   |
| 600 | GRN_MOUSE      | Grn         | Progranulin                                                      | 0,154036  | 0,146847   |
| 601 | DPP4_MOUSE     | Dpp4        | Dipeptidyl peptidase 4                                           | 0,123596  | -0,124923  |
| 602 | KPCD_MOUSE     | Prkcd       | Protein kinase C delta type                                      | 0,943302  | 0,637051   |
| 603 | PABP1_MOUSE    | Pabpc1      | Polyadenylate-binding protein 1                                  | 0,471943  | 0,235259   |
| 604 | PTN6_MOUSE     | Ptpn6       | Tyrosine-protein phosphatase non-receptor type 6                 | 0,0464582 | 0,0351742  |
| 605 | FRIL1_MOUSE    | Fil1        | Ferritin light chain 1                                           | 0,479175  | 1,10465    |
| 606 | VCAM1_MOUSE    | Vcam1       | Vascular cell adhesion protein 1                                 | 0,200577  | -0,162471  |
| 607 | NEDD8_MOUSE    | Nedd8       | NEDD8                                                            | 0,218763  | -0,0911751 |
| 608 | FETUA_MOUSE    | Ahsg        | Alpha-2-HS-glycoprotein                                          | 0,663992  | -0,473175  |
| 609 | OAT_MOUSE      | Oat         | Ornithine aminotransferase, mitochondrial                        | 0,496433  | -0,542378  |
| 610 | VTNC_MOUSE     | Vtn         | Vitronectin                                                      | 1,61815   | 0,745412   |
| 611 | GSTA3_MOUSE    | Gsta3       | Glutathione S-transferase A3                                     | 0,552992  | -0,245564  |
| 612 | PPIC_MOUSE     | Ppic        | Peptidyl-prolyl cis-trans isomerase C                            | 0,437179  | -0,502412  |
| 613 | FKBP4_MOUSE    | Fkbp4       | Peptidyl-prolyl cis-trans isomerase FKBP4                        | 0,962881  | 0,440101   |
| 614 | HMGB2_MOUSE    | Hmgb2       | High mobility group protein B2                                   | 0,729382  | -1,05892   |
| 615 | CTND1_MOUSE    | Ctnnd1      | Catenin delta-1                                                  | 0,803846  | 0,225111   |
| 616 | DESM_MOUSE     | Des         | Desmin                                                           | 0,200516  | 0,293048   |
| 617 | AIMP1_MOUSE    | Aimp1       | Aminoacyl tRNA synthase complex-interacting protein 1            | 0,987327  | 0,499415   |
| 618 | S10A9_MOUSE    | S100a9      | Protein S100-A9                                                  | 2,09407   | 1,39158    |
| 619 | ACBP_MOUSE     | Dbi         | Acyl-CoA-binding protein                                         | 0,40411   | -0,219909  |

|     |             |          |                                                            |            |             |
|-----|-------------|----------|------------------------------------------------------------|------------|-------------|
| 620 | MP2K1_MOUSE | Map2k1   | Dual specificity mitogen-activated protein kinase kinase 1 | 0,134567   | 0,110665    |
| 621 | NLTP_MOUSE  | Scp2     | Non-specific lipid-transfer protein                        | 2,22244    | 1,40545     |
| 622 | LA_MOUSE    | Ssb      | Lupus La protein homolog                                   | 0,384811   | 0,194939    |
| 623 | DRG1_MOUSE  | Drg1     | Developmentally-regulated GTP-binding protein 1            | 0,1161     | 0,0555004   |
| 624 | ANT3_MOUSE  | Serpinc1 | Antithrombin-III                                           | 0,191382   | 0,148637    |
| 625 | NECT2_MOUSE | Nectin2  | Nectin-2                                                   | 0,600924   | 0,300293    |
| 626 | RASK_MOUSE  | Kras     | GTPase KRas                                                | 0,573661   | 0,25433     |
| 627 | SYWC_MOUSE  | Wars     | Tryptophan--tRNA ligase, cytoplasmic                       | 1,1661     | 0,199219    |
| 628 | CP2F2_MOUSE | Cyp2f2   | Cytochrome P450 2F2                                        | 0,172341   | -0,168359   |
| 629 | PROC_MOUSE  | Proc     | Vitamin K-dependent protein C                              | 1,26212    | 0,584216    |
| 630 | APOC3_MOUSE | Apoc3    | Apolipoprotein C-III                                       | 0,151848   | 0,203619    |
| 631 | RANG_MOUSE  | Ranbp1   | Ran-specific GTPase-activating protein                     | 0,996131   | -0,439364   |
| 632 | FAK1_MOUSE  | Ptk2     | Focal adhesion kinase 1                                    | 0,0627694  | 0,0586716   |
| 633 | HYES_MOUSE  | Ephx2    | Bifunctional epoxide hydrolase 2                           | 3,77204    | 0,695476    |
| 634 | ASGR1_MOUSE | Asgr1    | Asialoglycoprotein receptor 1                              | 0,551325   | -0,242605   |
| 635 | APOC1_MOUSE | Apoc1    | Apolipoprotein C-I                                         | 0,628475   | 0,270815    |
| 636 | UBP4_MOUSE  | Usp4     | Ubiquitin carboxyl-terminal hydrolase 4                    | 0,091717   | -0,0691235  |
| 637 | PTN11_MOUSE | Ptpn11   | Tyrosine-protein phosphatase non-receptor type 11          | 0,845542   | 0,358399    |
| 638 | RAB5C_MOUSE | Rab5c    | Ras-related protein Rab-5C                                 | 0,463857   | -0,256536   |
| 639 | RAB6A_MOUSE | Rab6a    | Ras-related protein Rab-6A                                 | 0,151656   | 0,140311    |
| 640 | RAB21_MOUSE | Rab21    | Ras-related protein Rab-21                                 | 1,02934    | 0,681445    |
| 641 | RAB18_MOUSE | Rab18    | Ras-related protein Rab-18                                 | 2,27503    | 0,515598    |
| 642 | TSP1_MOUSE  | Thbs1    | Thrombospondin-1                                           | 1,51064    | 0,632071    |
| 643 | ODPA_MOUSE  | Pdha1    | Pyruvate dehydrogenase E1                                  | 0,185445   | -0,0726902  |
| 644 | HUTH_MOUSE  | Hal      | Histidine ammonia-lyase                                    | 0,638792   | -0,332693   |
| 645 | FAAA_MOUSE  | Fah      | Fumarylacetoacetase                                        | 0,551651   | -0,977559   |
| 646 | FBRL_MOUSE  | Fbl      | rRNA 2'-O-methyltransferase fibrillarin                    | 0,193326   | -0,0726055  |
| 647 | CALX_MOUSE  | Canx     | Calnexin                                                   | 0,247888   | -0,0728432  |
| 648 | IRS1_MOUSE  | Irs1     | Insulin receptor substrate 1                               | 0,300196   | 0,220712    |
| 649 | AP1M1_MOUSE | Ap1m1    | AP-1 complex subunit mu-1                                  | 0,339811   | 0,282882    |
| 650 | PRDX1_MOUSE | Prdx1    | Peroxiredoxin-1                                            | 0,583032   | -0,291983   |
| 651 | PTN1_MOUSE  | Ptpn1    | Tyrosine-protein phosphatase non-receptor type 1           | 0,407007   | 0,22588     |
| 652 | PTPRK_MOUSE | Ptpk     | Receptor-type tyrosine-protein phosphatase kappa           | 1,02489    | 0,89446     |
| 653 | PTN12_MOUSE | Ptpn12   | Tyrosine-protein phosphatase non-receptor type 12          | 0,854802   | -0,512933   |
| 654 | FMR1_MOUSE  | Fmr1     | Synaptic functional regulator FMR1                         | 0,474507   | 0,317738    |
| 655 | LDLR_MOUSE  | Ldlr     | Low-density lipoprotein receptor                           | 0,758623   | 0,474814    |
| 656 | RL12_MOUSE  | Rpl12    | 60S ribosomal protein L12                                  | 0,843321   | 0,745198    |
| 657 | RL18_MOUSE  | Rpl18    | 60S ribosomal protein L18                                  | 0,4165     | 0,363221    |
| 658 | TAP2_MOUSE  | Tap2     | Antigen peptide transporter 2                              | 0,196228   | 0,114317    |
| 659 | HEM6_MOUSE  | Cpox     | Oxygen-dependent coproporphyrinogen-III oxidase            | 0,434151   | 0,233881    |
| 660 | PPM1B_MOUSE | Ppm1b    | Protein phosphatase 1B                                     | 0,119564   | 0,136725    |
| 661 | NCPR_MOUSE  | Por      | NADPH--cytochrome P450 reductase                           | 0,0849437  | -0,0480217  |
| 662 | TAGL_MOUSE  | Tagln    | Transgelin                                                 | 0,718022   | -0,957339   |
| 663 | HMGCL_MOUSE | Hmgcl    | Hydroxymethylglutaryl-CoA lyase, mitochondrial             | 0,00838672 | -0,00393715 |
| 664 | GRP75_MOUSE | Hspa9    | Stress-70 protein, mitochondrial                           | 0,917488   | 0,599097    |
| 665 | MBL1_MOUSE  | Mbl1     | Mannose-binding protein A                                  | 2,36235    | 0,895544    |
| 666 | DYN2_MOUSE  | Dnm2     | Dynamin-2                                                  | 0,943283   | 0,335656    |
| 667 | CO1A1_MOUSE | Col18a1  | Collagen alpha-1(XVIII) chain                              | 0,585297   | 0,340623    |
| 668 | ZO1_MOUSE   | Tjp1     | Tight junction protein ZO-1                                | 0,34373    | -0,142363   |
| 669 | FEN1_MOUSE  | Fen1     | Flap endonuclease 1                                        | 0,886657   | 0,47333     |
| 670 | CAP1_MOUSE  | Cap1     | Adenylyl cyclase-associated protein 1                      | 0,451152   | 0,313747    |
| 671 | TKT_MOUSE   | Tkt      | Transketolase                                              | 0,764726   | 0,513929    |

|     |             |          |                                                                |            |             |
|-----|-------------|----------|----------------------------------------------------------------|------------|-------------|
| 672 | VP26A_MOUSE | Vps26a   | Vacuolar protein sorting-associated protein 26A                | 0,575798   | -0,337981   |
| 673 | VHL_MOUSE   | Vhl      | von Hippel-Lindau disease tumor suppressor                     | 0,914902   | 0,589205    |
| 674 | TFAM_MOUSE  | Tfam     | Transcription factor A, mitochondrial                          | 0,86551    | 0,182943    |
| 675 | INMT_MOUSE  | Inmt     | Indolethylamine N-methyltransferase                            | 0,609034   | -0,33261    |
| 676 | RL28_MOUSE  | Rpl28    | 60S ribosomal protein L28                                      | 0,100932   | -0,0496159  |
| 677 | ACSL1_MOUSE | Acs1     | Long-chain-fatty-acid--CoA ligase 1                            | 0,0961624  | -0,0735252  |
| 678 | ABCA1_MOUSE | Abca1    | Phospholipid-transporting ATPase ABCA1                         | 0,676734   | 0,366715    |
| 679 | CSK_MOUSE   | Csk      | Tyrosine-protein kinase CSK                                    | 0,0595363  | -0,0215797  |
| 680 | MBL2_MOUSE  | Mbl2     | Mannose-binding protein C                                      | 1,90785    | 0,607495    |
| 681 | ECI1_MOUSE  | Eci1     | Enoyl-CoA delta isomerase 1, mitochondrial                     | 0,281724   | -0,147007   |
| 682 | FOXK1_MOUSE | Foxk1    | Forkhead box protein K1                                        | 0,0117323  | -0,00999527 |
| 683 | SEPT2_MOUSE | Septin2  | Septin-2                                                       | 0,517407   | 0,202602    |
| 684 | STAT1_MOUSE | Stat1    | Signal transducer and activator of transcription 1             | 0,924074   | -0,406846   |
| 685 | STAT3_MOUSE | Stat3    | Signal transducer and activator of transcription 3             | 0,535821   | 0,172846    |
| 686 | STA5A_MOUSE | Stat5a   | Signal transducer and activator of transcription 5A            | 0,103921   | -0,116742   |
| 687 | STA5B_MOUSE | Stat5b   | Signal transducer and activator of transcription 5B            | 0,120184   | -0,101437   |
| 688 | PK3CA_MOUSE | Pik3ca   | Phosphatidylinositol 4,5-bisphosphate 3-kinase                 | 0,0726465  | -0,0383381  |
| 689 | EPS15_MOUSE | Eps15    | Epidermal growth factor receptor substrate 15                  | 0,725628   | 0,1697      |
| 690 | PURA_MOUSE  | Pura     | Transcriptional activator protein Pur-alpha                    | 0,898208   | 0,336817    |
| 691 | LIFR_MOUSE  | Lifr     | Leukemia inhibitory factor receptor                            | 0,00929241 | 0,0114697   |
| 692 | TCPQ_MOUSE  | Cct8     | T-complex protein 1 subunit theta                              | 1,54573    | 0,543346    |
| 693 | TETN_MOUSE  | Clec3b   | Tetranectin                                                    | 0,273446   | 0,102824    |
| 694 | MSH2_MOUSE  | Msh2     | DNA mismatch repair protein Msh2                               | 0,170966   | -0,179272   |
| 695 | H14_MOUSE   | Hist1h1e | Histone H1.4                                                   | 0,514125   | 1,42293     |
| 696 | H11_MOUSE   | Hist1h1a | Histone H1.1                                                   | 0,111242   | -0,0980419  |
| 697 | H15_MOUSE   | Hist1h1b | Histone H1.5                                                   | 0,177035   | -0,0792328  |
| 698 | ITAV_MOUSE  | Ilgav    | Integrin alpha-V                                               | 0,952488   | 0,390231    |
| 699 | PLIN2_MOUSE | Plin2    | Perilipin-2                                                    | 1,28847    | 1,69409     |
| 700 | ALDR_MOUSE  | Akr1b1   | Aldo-keto reductase family 1 member B1                         | 0,254012   | -0,0856003  |
| 701 | ALD2_MOUSE  | Akr1b8   | Aldose reductase-related protein 2                             | 0,021318   | 0,0153309   |
| 702 | CBP_MOUSE   | Crebbp   | CREB-binding protein                                           | 0,0364879  | 0,0814487   |
| 703 | COF2_MOUSE  | Cfl2     | Cofilin-2                                                      | 0,693706   | 0,404613    |
| 704 | MA1A1_MOUSE | Man1a1   | Mannosyl-oligosaccharide 1,2-alpha-mannosidase IA              | 0,113403   | 0,102908    |
| 705 | FKBP2_MOUSE | Fkbp2    | Peptidyl-prolyl cis-trans isomerase FKBP2                      | 0,459708   | 0,402418    |
| 706 | ACADM_MOUSE | Acadm    | Medium-chain specific acyl-CoA dehydrogenase, mitochondrial    | 0,391706   | -0,235801   |
| 707 | RAGP1_MOUSE | Rangap1  | Ran GTPase-activating protein 1                                | 0,297441   | -0,11931    |
| 708 | SIPA1_MOUSE | Sipa1    | Signal-induced proliferation-associated protein 1              | 0,0224482  | -0,0410172  |
| 709 | GPX3_MOUSE  | Gpx3     | Glutathione peroxidase 3                                       | 0,620644   | -0,298275   |
| 710 | CDN1B_MOUSE | Cdkn1b   | Cyclin-dependent kinase inhibitor 1B                           | 1,26253    | 0,266585    |
| 711 | NSF_MOUSE   | Nsf      | Vesicle-fusing ATPase                                          | 0,881093   | 0,260408    |
| 712 | VPS4B_MOUSE | Vps4b    | Vacuolar protein sorting-associated protein 4B                 | 0,412226   | 0,363902    |
| 713 | PRS7_MOUSE  | Psmc2    | 26S proteasome regulatory subunit 7                            | 0,810876   | 0,164662    |
| 714 | RB11B_MOUSE | Rab11b   | Ras-related protein Rab-11B                                    | 0,370838   | -0,155098   |
| 715 | ADX_MOUSE   | Fdx1     | Adrenodoxin, mitochondrial                                     | 0,342207   | 0,297111    |
| 716 | PURA2_MOUSE | Adss     | Adenylosuccinate synthetase isozyme 2                          | 1,04341    | 0,516118    |
| 717 | PDCD2_MOUSE | Pdcd2    | Programmed cell death protein 2                                | 1,12352    | 0,592668    |
| 718 | MYO1B_MOUSE | Myo1b    | Unconventional myosin-Ib                                       | 0,193052   | 0,0385262   |
| 719 | BRCC3_MOUSE | Brcc3    | Lys-63-specific deubiquitinase BRCC36                          | 0,719706   | -0,946062   |
| 720 | NEDD4_MOUSE | Nedd4    | E3 ubiquitin-protein ligase NEDD4                              | 0,749011   | 0,208867    |
| 721 | YAP1_MOUSE  | Yap1     | Transcriptional coactivator YAP1                               | 1,3011     | 0,445317    |
| 722 | STT3A_MOUSE | Stt3a    | Dolichyl-diphosphooligosaccharide--protein glycosyltransferase | 0,248734   | -0,252344   |
| 723 | QOR_MOUSE   | Cryz     | Quinone oxidoreductase                                         | 0,178721   | -0,0927654  |

|     |             |          |                                                                  |            |             |
|-----|-------------|----------|------------------------------------------------------------------|------------|-------------|
| 724 | ALDH2_MOUSE | Aldh2    | Aldehyde dehydrogenase, mitochondrial                            | 0,171202   | 0,146772    |
| 725 | AL3A2_MOUSE | Aldh3a2  | Aldehyde dehydrogenase family 3 member A2                        | 0,29979    | 0,149913    |
| 726 | CAZA1_MOUSE | Capza1   | F-actin-capping protein subunit alpha-1                          | 0,568578   | 0,320848    |
| 727 | CAZA2_MOUSE | Capza2   | F-actin-capping protein subunit alpha-2                          | 0,350047   | -0,907615   |
| 728 | CAPZB_MOUSE | Capzb    | F-actin-capping protein subunit beta                             | 0,0752077  | -0,0131855  |
| 729 | SRPRB_MOUSE | Srprb    | Signal recognition particle receptor subunit beta                | 0,869702   | 0,24093     |
| 730 | GSHR_MOUSE  | Gsr      | Glutathione reductase, mitochondrial                             | 1,54469    | 0,60327     |
| 731 | MTX1_MOUSE  | Mtx1     | Metaxin-1                                                        | 0,31062    | -0,26578    |
| 732 | MP2K4_MOUSE | Map2k4   | Dual specificity mitogen-activated protein kinase kinase 4       | 0,988317   | 0,447959    |
| 733 | MK14_MOUSE  | Mapk14   | Mitogen-activated protein kinase 14                              | 0,747592   | -1,02294    |
| 734 | GFPT1_MOUSE | Gfpt1    | Glutamine--fructose-6-phosphate aminotransferase [isomerizing] 1 | 0,382066   | 0,191678    |
| 735 | PFKAM_MOUSE | Pfkm     | ATP-dependent 6-phosphofructokinase, muscle type                 | 0,132372   | 0,181871    |
| 736 | IBP1_MOUSE  | Igfbp1   | Insulin-like growth factor-binding protein 1                     | 0,130068   | -0,237882   |
| 737 | IBP3_MOUSE  | Igfbp3   | Insulin-like growth factor-binding protein 3                     | 1,08746    | 1,41666     |
| 738 | IBP4_MOUSE  | Igfbp4   | Insulin-like growth factor-binding protein 4                     | 1,19632    | 0,835209    |
| 739 | RL6_MOUSE   | Rpl6     | 60S ribosomal protein L6                                         | 0,698418   | 0,336848    |
| 740 | RL29_MOUSE  | Rpl29    | 60S ribosomal protein L29                                        | 0,0294022  | -0,0143879  |
| 741 | CACP_MOUSE  | Crat     | Carnitine O-acetyltransferase                                    | 0,428568   | 0,313346    |
| 742 | CRKL_MOUSE  | Crkl     | Crk-like protein                                                 | 0,630837   | 0,309932    |
| 743 | RL5_MOUSE   | Rpl5     | 60S ribosomal protein L5                                         | 0,147226   | 0,0860973   |
| 744 | RL13_MOUSE  | Rpl13    | 60S ribosomal protein L13                                        | 0,0544254  | -0,0250561  |
| 745 | RL36_MOUSE  | Rpl36    | 60S ribosomal protein L36                                        | 0,0099274  | 0,00434875  |
| 746 | EIF1_MOUSE  | Eif1     | Eukaryotic translation initiation factor 1                       | 0,663284   | -0,338169   |
| 747 | KSYK_MOUSE  | Syk      | Tyrosine-protein kinase SYK                                      | 1,06352    | 1,02045     |
| 748 | ANXA5_MOUSE | Anxa5    | Annexin A5                                                       | 0,433626   | -0,30325    |
| 749 | 41_MOUSE    | Epb41    | Protein 4.1                                                      | 0,21625    | 0,152479    |
| 750 | TBCA_MOUSE  | Tbca     | Tubulin-specific chaperone A                                     | 0,867635   | 0,461982    |
| 751 | LMNA_MOUSE  | Lmna     | Prelamin-A/C                                                     | 0,200313   | 0,123799    |
| 752 | HS74L_MOUSE | Hspa4l   | Heat shock 70 kDa protein 4L                                     | 1,44978    | 0,629794    |
| 753 | CBR1_MOUSE  | Cbr1     | Carbonyl reductase [NADPH] 1                                     | 0,884082   | 0,591402    |
| 754 | GSTM5_MOUSE | Gstm5    | Glutathione S-transferase Mu 5                                   | 0,338253   | -0,243084   |
| 755 | T23O_MOUSE  | Tdo2     | Tryptophan 2,3-dioxygenase                                       | 2,36877    | -1,51069    |
| 756 | ADT1_MOUSE  | Slc25a4  | ADP/ATP translocase 1                                            | 1,22179    | -1,09897    |
| 757 | MAPK2_MOUSE | Mapkapk2 | MAP kinase-activated protein kinase 2                            | 2,02569    | 0,747411    |
| 758 | HEP2_MOUSE  | Serpind1 | Heparin cofactor 2                                               | 0,00949619 | 0,0121799   |
| 759 | EPB42_MOUSE | Epb42    | Erythrocyte membrane protein band 4.2                            | 1,83979    | 1,00016     |
| 760 | PERE_MOUSE  | Epx      | Eosinophil peroxidase                                            | 1,98472    | 1,54596     |
| 761 | ROA1_MOUSE  | Hnmpa1   | Heterogeneous nuclear ribonucleoprotein A1                       | 0,658106   | 0,401308    |
| 762 | HPPD_MOUSE  | Hpd      | 4-hydroxyphenylpyruvate dioxygenase                              | 2,09036    | -1,08078    |
| 763 | INPP_MOUSE  | Inpp1    | Inositol polyphosphate 1-phosphatase                             | 0,836191   | 0,949996    |
| 764 | PPM1A_MOUSE | Ppm1a    | Protein phosphatase 1A                                           | 0,545054   | 0,496687    |
| 765 | PCY1A_MOUSE | Pcyt1a   | Choline-phosphate cytidyltransferase A                           | 0,247588   | 0,300076    |
| 766 | CDK5_MOUSE  | Cdk5     | Cyclin-dependent-like kinase 5                                   | 0,0539529  | -0,0466946  |
| 767 | HNF4A_MOUSE | Hnf4a    | Hepatocyte nuclear factor 4-alpha                                | 0,0825733  | -0,0399578  |
| 768 | HCLS1_MOUSE | Hcls1    | Hematopoietic lineage cell-specific protein                      | 1,47342    | 0,556715    |
| 769 | MCM4_MOUSE  | Mcm4     | DNA replication licensing factor MCM4                            | 0,992409   | 0,504875    |
| 770 | MCM5_MOUSE  | Mcm5     | DNA replication licensing factor MCM5                            | 0,568314   | 0,506454    |
| 771 | PSA2_MOUSE  | Psm2     | Proteasome subunit alpha type-2                                  | 0,857223   | 0,36588     |
| 772 | CATH_MOUSE  | Ctsh     | Pro-cathepsin H                                                  | 0,731712   | -0,624318   |
| 773 | SRP09_MOUSE | Srp9     | Signal recognition particle 9 kDa protein                        | 1,43728    | 0,460791    |
| 774 | ODBA_MOUSE  | Bckdha   | 2-oxoisovalerate dehydrogenase subunit alpha, mitochondrial      | 0,278565   | 0,149389    |
| 775 | DHB8_MOUSE  | Hsd17b8  | Estradiol 17-beta-dehydrogenase 8                                | 0,00569887 | -0,00644417 |

|     |             |          |                                                                      |           |            |
|-----|-------------|----------|----------------------------------------------------------------------|-----------|------------|
| 776 | DHI1_MOUSE  | Hsd11b1  | Corticosteroid 11-beta-dehydrogenase isozyme 1                       | 0,177685  | 0,091927   |
| 777 | ST2A2_MOUSE | Sult2a2  | Bile salt sulfotransferase 2                                         | 1,58923   | -2,00991   |
| 778 | SAHH_MOUSE  | Ahcy     | Adenosylhomocysteinase                                               | 1,20913   | 1,03002    |
| 779 | FMO1_MOUSE  | Fmo1     | Dimethylaniline monooxygenase [N-oxide-forming] 1                    | 0,920318  | 0,609616   |
| 780 | ARY2_MOUSE  | Nat2     | Arylamine N-acetyltransferase 2                                      | 0,93655   | 0,548981   |
| 781 | GDIA_MOUSE  | Gdi1     | Rab GDP dissociation inhibitor alpha                                 | 0,0830815 | -0,0658836 |
| 782 | STS_MOUSE   | Sts      | Steryl-sulfatase                                                     | 0,84191   | 0,462734   |
| 783 | ARSB_MOUSE  | Arsb     | Arylsulfatase B                                                      | 0,362149  | -0,348869  |
| 784 | GLYC_MOUSE  | Shmt1    | Serine hydroxymethyltransferase, cytosolic                           | 0,294306  | 0,116143   |
| 785 | CSRP3_MOUSE | Csrp3    | Cysteine and glycine-rich protein 3                                  | 0,493954  | 0,382003   |
| 786 | VATA_MOUSE  | Atp6v1a  | V-type proton ATPase catalytic subunit A                             | 0,492364  | 0,406726   |
| 787 | VATE1_MOUSE | Atp6v1e1 | V-type proton ATPase subunit E 1                                     | 0,7009    | 0,256028   |
| 788 | S10AB_MOUSE | S100a11  | Protein S100-A11                                                     | 0,339302  | -0,90506   |
| 789 | ACADV_MOUSE | Acadvl   | Very long-chain specific acyl-CoA dehydrogenase, mitochondrial       | 1,85231   | 0,497198   |
| 790 | PA2G4_MOUSE | Pa2g4    | Proliferation-associated protein 2G4                                 | 0,698933  | 0,258555   |
| 791 | FMOD_MOUSE  | Fmod     | Fibromodulin                                                         | 0,256852  | 0,71948    |
| 792 | ICAL_MOUSE  | Cast     | Calpastatin                                                          | 0,111665  | 0,125669   |
| 793 | RAB7A_MOUSE | Rab7a    | Ras-related protein Rab-7a                                           | 0,469618  | -0,206083  |
| 794 | ACADL_MOUSE | Acadl    | Long-chain specific acyl-CoA dehydrogenase, mitochondrial            | 0,922397  | 0,79673    |
| 795 | PPOX_MOUSE  | Ppox     | Protoporphyrinogen oxidase                                           | 0,670762  | 0,46838    |
| 796 | RL9_MOUSE   | Rpl9     | 60S ribosomal protein L9                                             | 1,07614   | 0,595771   |
| 797 | PLCB3_MOUSE | Plcb3    | 1-phosphatidylinositol 4,5-bisphosphate phosphodiesterase beta-3     | 0,517728  | 0,249361   |
| 798 | GPC4_MOUSE  | Gpc4     | Glypican-4                                                           | 1,18057   | 0,732      |
| 799 | DHB2_MOUSE  | Hsd17b2  | Estradiol 17-beta-dehydrogenase 2                                    | 0,0722261 | 0,0877129  |
| 800 | DHB4_MOUSE  | Hsd17b4  | Peroxisomal multifunctional enzyme type 2                            | 1,93409   | 0,84901    |
| 801 | GSHB_MOUSE  | Gss      | Glutathione synthetase                                               | 1,12667   | 0,828722   |
| 802 | HDGF_MOUSE  | Hdgf     | Hepatoma-derived growth factor                                       | 0,283146  | 0,124926   |
| 803 | VA0D1_MOUSE | Atp6v0d1 | V-type proton ATPase subunit d 1                                     | 0,107272  | -0,140431  |
| 804 | ADT2_MOUSE  | Slc25a5  | ADP/ATP translocase 2                                                | 0,278786  | -0,253061  |
| 805 | LUM_MOUSE   | Lum      | Lumican                                                              | 0,0182047 | -0,0254864 |
| 806 | THTR_MOUSE  | Tst      | Thiosulfate sulfurtransferase                                        | 0,410352  | 0,179684   |
| 807 | IMA1_MOUSE  | Kpna2    | Importin subunit alpha-1                                             | 0,339881  | 0,32834    |
| 808 | JAK1_MOUSE  | Jak1     | Tyrosine-protein kinase JAK1                                         | 0,0508851 | 0,0140144  |
| 809 | PON1_MOUSE  | Pon1     | Serum paraoxonase/arylesterase 1                                     | 0,209069  | -0,216276  |
| 810 | DPOD1_MOUSE | Pold1    | DNA polymerase delta catalytic subunit                               | 0,665337  | 0,396667   |
| 811 | RPAC1_MOUSE | Polr1c   | DNA-directed RNA polymerases I and III subunit RPAC1                 | 1,06583   | 0,35201    |
| 812 | UBP10_MOUSE | Usp10    | Ubiquitin carboxyl-terminal hydrolase 10                             | 0,236328  | -0,115229  |
| 813 | KPYM_MOUSE  | Pkm      | Pyruvate kinase PKM                                                  | 0,28205   | 0,185635   |
| 814 | NDUS6_MOUSE | Ndufs6   | NADH dehydrogenase [ubiquinone] iron-sulfur protein 6, mitochondrial | 0,0218266 | -0,012532  |
| 815 | UCK1_MOUSE  | Uck1     | Uridine-cytidine kinase 1                                            | 3,19081   | 0,532621   |
| 816 | STAT6_MOUSE | Stat6    | Signal transducer and transcription activator 6                      | 0,0718715 | -0,0715439 |
| 817 | RIDA_MOUSE  | Rida     | 2-iminobutanoate/2-iminopropanoate deaminase                         | 0,468979  | 0,222734   |
| 818 | HXK4_MOUSE  | Gck      | Hexokinase-4                                                         | 0,321385  | -0,296624  |
| 819 | CPT2_MOUSE  | Cpt2     | Carnitine O-palmitoyltransferase 2, mitochondrial                    | 0,634964  | 0,301624   |
| 820 | ST1A1_MOUSE | Sult1a1  | Sulfotransferase 1A1                                                 | 0,41933   | -0,0975246 |
| 821 | ST2A1_MOUSE | Sult2a1  | Bile salt sulfotransferase 1                                         | 1,50268   | -1,80769   |
| 822 | RL10A_MOUSE | Rpl10a   | 60S ribosomal protein L10a                                           | 0,659023  | -0,247018  |
| 823 | ODB2_MOUSE  | Dbt      | Lipoamide acyltransferase                                            | 0,358194  | -0,134444  |
| 824 | KPYR_MOUSE  | Pklr     | Pyruvate kinase PKLR                                                 | 1,09296   | 0,502551   |
| 825 | CCHL_MOUSE  | Hccs     | Cytochrome c-type heme lyase                                         | 0,415722  | 0,534011   |
| 826 | FDFT_MOUSE  | Fdft1    | Squalene synthase                                                    | 0,940004  | -1,00433   |
| 827 | PIPNA_MOUSE | Pitpna   | Phosphatidylinositol transfer protein alpha isoform                  | 0,117759  | -0,164637  |

|     |             |         |                                                               |           |             |
|-----|-------------|---------|---------------------------------------------------------------|-----------|-------------|
| 828 | PIPNB_MOUSE | Pitpnb  | Phosphatidylinositol transfer protein beta isoform            | 0,488504  | 0,280813    |
| 829 | RAB2A_MOUSE | Rab2a   | Ras-related protein Rab-2A                                    | 0,0238077 | 0,0204998   |
| 830 | APC1_MOUSE  | Anapc1  | Anaphase-promoting complex subunit 1                          | 0,568659  | 0,291097    |
| 831 | CNBP_MOUSE  | Cnbp    | Cellular nucleic acid-binding protein                         | 0,292279  | -0,146348   |
| 832 | IDHP_MOUSE  | Idh2    | Isocitrate dehydrogenase [NADP], mitochondrial                | 0,0943124 | 0,0702194   |
| 833 | DNJC2_MOUSE | Dnajc2  | DnaJ homolog subfamily C member 2                             | 0,682414  | 0,255461    |
| 834 | STOM_MOUSE  | Stom    | Erythrocyte band 7 integral membrane protein                  | 0,216312  | 0,0656464   |
| 835 | STMN1_MOUSE | Stmn1   | Stathmin                                                      | 0,0239068 | -0,0157696  |
| 836 | ATX1_MOUSE  | Atxn1   | Ataxin-1                                                      | 0,33773   | 0,274272    |
| 837 | MSH6_MOUSE  | Msh6    | DNA mismatch repair protein Msh6                              | 0,551987  | 0,319207    |
| 838 | RD23A_MOUSE | Rad23a  | UV excision repair protein RAD23 homolog A                    | 0,619667  | 0,728009    |
| 839 | RD23B_MOUSE | Rad23b  | UV excision repair protein RAD23 homolog B                    | 1,18746   | 0,526881    |
| 840 | NUB1_MOUSE  | Nub1    | NEDD8 ultimate buster 1                                       | 0,152105  | 0,120167    |
| 841 | FAF1_MOUSE  | Faf1    | FAS-associated factor 1                                       | 0,19996   | -0,206559   |
| 842 | SIA4A_MOUSE | St3gal1 | CMP-N-acetylneuraminate-galactosamide-alpha-2,3-transferase 1 | 0,714789  | 0,245959    |
| 843 | EPHB4_MOUSE | Ephb4   | Ephrin type-B receptor 4                                      | 0,299676  | 0,374615    |
| 844 | PRS6B_MOUSE | Psmc4   | 26S proteasome regulatory subunit 6B                          | 0,827306  | 0,286354    |
| 845 | TNG2_MOUSE  | Tango2  | Transport and Golgi organization 2 homolog                    | 0,673723  | -0,19446    |
| 846 | PUR8_MOUSE  | Adsl    | Adenylosuccinate lyase                                        | 0,217488  | 0,0937206   |
| 847 | HMCS2_MOUSE | Hmgcs2  | Hydroxymethylglutaryl-CoA synthase, mitochondrial             | 1,57683   | 0,63071     |
| 848 | FABPI_MOUSE | Fabp2   | Fatty acid-binding protein, intestinal                        | 2,01673   | 1,08577     |
| 849 | ABCD3_MOUSE | Abcd3   | ATP-binding cassette sub-family D member 3                    | 1,32677   | 0,343606    |
| 850 | CATK_MOUSE  | Ctsk    | Cathepsin K                                                   | 0,377428  | 0,491379    |
| 851 | RAB8A_MOUSE | Rab8a   | Ras-related protein Rab-8A                                    | 0,320217  | -0,209919   |
| 852 | ADK_MOUSE   | Adk     | Adenosine kinase                                              | 0,136822  | 0,147684    |
| 853 | DSC2_MOUSE  | Dsc2    | Desmocollin-2                                                 | 0,774891  | 0,337595    |
| 854 | AMRP_MOUSE  | Lrpap1  | Alpha-2-macroglobulin receptor-associated protein             | 0,245909  | 0,09361     |
| 855 | GOGA3_MOUSE | Golga3  | Golgin subfamily A member 3                                   | 0,381444  | 0,273275    |
| 856 | ATPK_MOUSE  | Atp5mf  | ATP synthase subunit f, mitochondrial                         | 0,177895  | -0,253405   |
| 857 | ALR_MOUSE   | Gfer    | FAD-linked sulfhydryl oxidase ALR                             | 1,24765   | 0,691879    |
| 858 | AP4A_MOUSE  | Nudt2   | Bis(5'-nucleosyl)-tetraphosphatase [asymmetrical]             | 0,138532  | 0,0731487   |
| 859 | ATP5E_MOUSE | Atp5f1e | ATP synthase subunit epsilon, mitochondrial                   | 0,566336  | 0,379455    |
| 860 | CDD_MOUSE   | Cda     | Cytidine deaminase                                            | 0,124427  | -0,1126     |
| 861 | CX6B1_MOUSE | Cox6b1  | Cytochrome c oxidase subunit 6B1                              | 0,657432  | 0,462669    |
| 862 | CYB5_MOUSE  | Cyb5a   | Cytochrome b5                                                 | 1,34404   | -0,555935   |
| 863 | UBP5_MOUSE  | Usp5    | Ubiquitin carboxyl-terminal hydrolase 5                       | 2,2577    | 0,334105    |
| 864 | ATPB_MOUSE  | Atp5f1b | ATP synthase subunit beta, mitochondrial                      | 0,307941  | -0,323479   |
| 865 | CD38_MOUSE  | Cd38    | ADP-ribosyl cyclase/cyclic ADP-ribose hydrolase 1             | 1,13933   | 0,592888    |
| 866 | CTBP2_MOUSE | Ctbp2   | C-terminal-binding protein 2                                  | 0,0697556 | -0,109276   |
| 867 | CP2AC_MOUSE | Cyp2a12 | Cytochrome P450 2A12                                          | 0,0104025 | -0,00577812 |
| 868 | CP237_MOUSE | Cyp2c37 | Cytochrome P450 2C37                                          | 0,341104  | -0,377966   |
| 869 | CP240_MOUSE | Cyp2c40 | Cytochrome P450 2C40                                          | 0,854531  | 0,589268    |
| 870 | PDCD5_MOUSE | Pdcd5   | Programmed cell death protein 5                               | 0,198452  | 0,131818    |
| 871 | ZNRD2_MOUSE | Znrd2   | Protein ZNRD2                                                 | 1,24563   | 0,543735    |
| 872 | FUS_MOUSE   | Fus     | RNA-binding protein FUS                                       | 0,672092  | -0,713767   |
| 873 | NICA_MOUSE  | Ncstn   | Nicastrin                                                     | 0,124567  | 0,0355549   |
| 874 | VATD_MOUSE  | Atp6v1d | V-type proton ATPase subunit D                                | 0,2644    | 0,0779591   |
| 875 | ERP29_MOUSE | Erp29   | Endoplasmic reticulum resident protein 29                     | 2,68414   | 0,610559    |
| 876 | EF1D_MOUSE  | Eef1d   | Elongation factor 1-delta                                     | 1,29794   | 0,482358    |
| 877 | ACTN4_MOUSE | Actn4   | Alpha-actinin-4                                               | 0,496992  | -0,109239   |
| 878 | RU2A_MOUSE  | Snrpa1  | U2 small nuclear ribonucleoprotein A'                         | 0,87646   | 0,366454    |
| 879 | IDI1_MOUSE  | Idi1    | Isopentenyl-diphosphate Delta-isomerase 1                     | 0,79739   | -0,899167   |



|     |                 |              |                                                            |           |            |
|-----|-----------------|--------------|------------------------------------------------------------|-----------|------------|
| 880 | NADK_MOUSE      | Nadk         | NAD kinase                                                 | 1,68754   | 0,340064   |
| 881 | RT21_MOUSE      | Mrps21       | 28S ribosomal protein S21, mitochondrial                   | 0,629101  | 0,595452   |
| 882 | RT06_MOUSE      | Mrps6        | 28S ribosomal protein S6, mitochondrial                    | 0,225827  | 0,234001   |
| 883 | ACOT8_MOUSE     | Acot8        | Acyl-coenzyme A thioesterase 8                             | 1,95304   | 1,09436    |
| 884 | EF2_MOUSE       | Eef2         | Elongation factor 2                                        | 0,131434  | 0,0762619  |
| 885 | OPA1_MOUSE      | Opa1         | Dynamin-like 120 kDa protein, mitochondrial                | 0,731263  | 0,150128   |
| 886 | PTPA_MOUSE      | Ptpa         | Serine/threonine-protein phosphatase 2A activator          | 0,103292  | -0,0805191 |
| 887 | STRN4_MOUSE     | Strn4        | Striatin-4                                                 | 0,0742333 | 0,0346859  |
| 888 | GGLO_MOUSE      | Gulo         | L-gulonolactone oxidase                                    | 0,320919  | -0,154597  |
| 889 | S26A1_MOUSE     | Slc26a1      | Sulfate anion transporter 1                                | 0,639279  | -0,324111  |
| 890 | TPM1_MOUSE      | Tpm1         | Tropomyosin alpha-1 chain                                  | 0,0108084 | -0,0120617 |
| 891 | TPM2_MOUSE      | Tpm2         | Tropomyosin beta chain                                     | 0,0868049 | -0,29166   |
| 892 | TB182_MOUSE     | Tnks1bp1     | 182 kDa tankyrase-1-binding protein                        | 0,831947  | 0,290382   |
| 893 | GMEB2_MOUSE     | Gmeb2        | Glucocorticoid modulatory element-binding protein 2        | 0,935515  | 1,13823    |
| 894 | B2L13_MOUSE     | Bcl2l13      | Bcl-2-like protein 13                                      | 0,545668  | -0,162357  |
| 895 | CING_MOUSE      | Cgn          | Cingulin                                                   | 1,19779   | 0,585118   |
| 896 | IF5_MOUSE       | Eif5         | Eukaryotic translation initiation factor 5                 | 0,962469  | 0,564505   |
| 897 | SF3B6_MOUSE     | Sf3b6        | Splicing factor 3B subunit 6                               | 0,953207  | 0,575989   |
| 898 | MRTFB_MOUSE     | Mrtfb        | Myocardin-related transcription factor B                   | 0,331133  | 0,358149   |
| 899 | DOCK4_MOUSE     | Dock4        | Dedicator of cytokinesis protein 4                         | 0,69914   | -0,791391  |
| 900 | ARPC4_MOUSE     | Arpc4        | Actin-related protein 2/3 complex subunit 4                | 0,800624  | -0,613457  |
| 901 | SC61G_MOUSE     | Sec61g       | Protein transport protein Sec61 subunit gamma              | 0,302838  | 0,357185   |
| 902 | RUVB1_MOUSE     | Ruvb1        | RuvB-like 1                                                | 0,044811  | 0,0177326  |
| 903 | EIF3E_MOUSE     | Eif3e        | Eukaryotic translation initiation factor 3 subunit E       | 0,333004  | 0,193718   |
| 904 | CDO1_MOUSE      | Cdo1         | Cysteine dioxygenase type 1                                | 0,301     | -0,74988   |
| 905 | PCBP1_MOUSE     | Pcbp1        | Poly(rC)-binding protein 1                                 | 1,28327   | 0,441629   |
| 906 | GBRL2_MOUSE     | Gabrarpl2    | Gamma-aminobutyric acid receptor-associated protein-like 2 | 1,45627   | 1,38034    |
| 907 | UB2G2_MOUSE     | Ube2g2       | Ubiquitin-conjugating enzyme E2 G2                         | 0,163864  | -0,378014  |
| 908 | NPL4_MOUSE      | Nplc4        | Nuclear protein localization protein 4 homolog             | 1,35414   | 0,536668   |
| 909 | ACTB_MOUSE;ACT1 | Actb;Actg1   | Actin, cytoplasmic 1                                       | 0,805744  | 1,39028    |
| 910 | CDC42_MOUSE     | Cdc42        | Cell division control protein 42 homolog                   | 0,232905  | 0,0804237  |
| 911 | IF4A1_MOUSE     | Eif4a1       | Eukaryotic initiation factor 4A-1                          | 0,284641  | 0,964907   |
| 912 | RS20_MOUSE      | Rps20        | 40S ribosomal protein S20                                  | 1,29066   | 0,453395   |
| 913 | CHP1_MOUSE      | Chp1         | Calcineurin B homologous protein 1                         | 0,633778  | 0,563835   |
| 914 | RAB10_MOUSE     | Rab10        | Ras-related protein Rab-10                                 | 1,18394   | -0,407579  |
| 915 | UB2D3_MOUSE     | Ube2d3       | Ubiquitin-conjugating enzyme E2 D3                         | 0,923255  | 0,441639   |
| 916 | UBC12_MOUSE     | Ube2m        | NEDD8-conjugating enzyme Ubc12                             | 0,849342  | 0,471022   |
| 917 | UBE2N_MOUSE     | Ube2n        | Ubiquitin-conjugating enzyme E2 N                          | 0,143975  | -0,0411861 |
| 918 | ARP2_MOUSE      | Atr2         | Actin-related protein 2                                    | 0,927773  | -0,16312   |
| 919 | ACTZ_MOUSE      | Actr1a       | Alpha-centractin                                           | 0,167559  | 0,0827705  |
| 920 | CSN2_MOUSE      | Cops2        | COP9 signalosome complex subunit 2                         | 0,257468  | 0,222063   |
| 921 | ARF1_MOUSE;ARF  | Arf1;Arf3    | ADP-ribosylation factor 3                                  | 0,0966887 | 0,0915882  |
| 922 | ABCE1_MOUSE     | Abce1        | ATP-binding cassette sub-family E member 1                 | 0,628191  | 0,22043    |
| 923 | RL26_MOUSE      | Rpl26        | 60S ribosomal protein L26                                  | 0,0631544 | 0,0381027  |
| 924 | PSME3_MOUSE     | Psme3        | Proteasome activator complex subunit 3                     | 0,0511018 | -0,047644  |
| 925 | MGN2_MOUSE;MG1  | Magoh;Magohb | Protein mago nashi homolog                                 | 0,876242  | 0,2733     |
| 926 | RL27_MOUSE      | Rpl27        | 60S ribosomal protein L27                                  | 0,33024   | -0,377678  |
| 927 | PHS_MOUSE       | Pcbd1        | Pterin-4-alpha-carbinolamine dehydratase                   | 0,0981851 | -0,0576351 |
| 928 | RL37A_MOUSE     | Rpl37a       | 60S ribosomal protein L37a                                 | 0,824995  | 0,385809   |
| 929 | PFD3_MOUSE      | Vbp1         | Prefoldin subunit 3                                        | 0,968407  | 0,340568   |
| 930 | GABT_MOUSE      | Abat         | 4-aminobutyrate aminotransferase, mitochondrial            | 2,23367   | -0,508974  |
| 931 | COPZ1_MOUSE     | Copz1        | Coatomer subunit zeta-1                                    | 0,833389  | -0,548349  |

|     |                 |             |                                                                  |           |            |
|-----|-----------------|-------------|------------------------------------------------------------------|-----------|------------|
| 932 | DCAF7_MOUSE     | Dcaf7       | DDB1- and CUL4-associated factor 7                               | 0,678043  | 0,606327   |
| 933 | WDR5_MOUSE      | Wdr5        | WD repeat-containing protein 5                                   | 0,575052  | 0,354172   |
| 934 | AP1S1_MOUSE     | Ap1s1       | AP-1 complex subunit sigma-1A                                    | 0,0748228 | -0,0771732 |
| 935 | HNRPK_MOUSE     | Hnmpk       | Heterogeneous nuclear ribonucleoprotein K                        | 0,676102  | 0,210752   |
| 936 | 1433G_MOUSE     | Ywhag       | 14-3-3 protein gamma                                             | 0,676523  | 0,202129   |
| 937 | RRAS2_MOUSE     | Rras2       | Ras-related protein R-Ras2                                       | 0,0303916 | -0,0208385 |
| 938 | TIM10_MOUSE     | Timm10      | Mitochondrial import inner membrane translocase subunit Tim10    | 0,291327  | 0,397927   |
| 939 | TIM13_MOUSE     | Timm13      | Mitochondrial import inner membrane translocase subunit Tim13    | 0,866875  | 0,221608   |
| 940 | TIM8B_MOUSE     | Timm8b      | Mitochondrial import inner membrane translocase subunit Tim8 B   | 0,689218  | 0,665804   |
| 941 | RS7_MOUSE       | Rps7        | 40S ribosomal protein S7                                         | 0,565121  | 0,769315   |
| 942 | PP1A_MOUSE      | Ppp1ca      | Serine/threonine-protein phosphatase PP1-alpha catalytic subunit | 1,07762   | 0,158593   |
| 943 | PRS4_MOUSE      | Psmc1       | 26S proteasome regulatory subunit 4                              | 1,2125    | 0,362318   |
| 944 | PRS8_MOUSE      | Psmc5       | 26S proteasome regulatory subunit 8                              | 0,0509748 | 0,0357399  |
| 945 | RS8_MOUSE       | Rps8        | 40S ribosomal protein S8                                         | 0,773798  | 0,367237   |
| 946 | RS15A_MOUSE     | Rps15a      | 40S ribosomal protein S15a                                       | 0,574447  | 0,327444   |
| 947 | UBE2H_MOUSE     | Ube2h       | Ubiquitin-conjugating enzyme E2 H                                | 0,135264  | -0,147052  |
| 948 | 1433E_MOUSE     | Ywhae       | 14-3-3 protein epsilon                                           | 0,42347   | -0,310006  |
| 949 | RS14_MOUSE      | Rps14       | 40S ribosomal protein S14                                        | 0,0912769 | 0,0493095  |
| 950 | RS23_MOUSE      | Rps23       | 40S ribosomal protein S23                                        | 0,573927  | 0,259471   |
| 951 | RS18_MOUSE      | Rps18       | 40S ribosomal protein S18                                        | 0,437476  | 0,27763    |
| 952 | RS29_MOUSE      | Rps29       | 40S ribosomal protein S29                                        | 1,44797   | 0,438507   |
| 953 | RS11_MOUSE      | Rps11       | 40S ribosomal protein S11                                        | 1,27759   | 0,516235   |
| 954 | RS13_MOUSE      | Rps13       | 40S ribosomal protein S13                                        | 1,25943   | 0,412474   |
| 955 | RUXG_MOUSE      | Snrpg       | Small nuclear ribonucleoprotein G                                | 0,742623  | -0,477732  |
| 956 | LSM6_MOUSE      | Lsm6        | U6 snRNA-associated Sm-like protein LSM6                         | 0,379844  | -0,170747  |
| 957 | SMD1_MOUSE      | Snrpd1      | Small nuclear ribonucleoprotein Sm D1                            | 0,382393  | -0,379785  |
| 958 | SMD2_MOUSE      | Snrpd2      | Small nuclear ribonucleoprotein Sm D2                            | 0,132197  | -0,119039  |
| 959 | SMD3_MOUSE      | Snrpd3      | Small nuclear ribonucleoprotein Sm D3                            | 2,15404   | 0,8863     |
| 960 | ARF6_MOUSE      | Arf6        | ADP-ribosylation factor 6                                        | 0,402198  | -0,356991  |
| 961 | PRS10_MOUSE     | Psmc6       | 26S proteasome regulatory subunit 10B                            | 0,818853  | 0,37049    |
| 962 | RS4X_MOUSE      | Rps4x       | 40S ribosomal protein S4, X isoform                              | 1,12715   | 0,239322   |
| 963 | PP2AB_MOUSE     | Ppp2cb      | Serine/threonine-protein phosphatase 2A                          | 0,619731  | -0,143289  |
| 964 | RL18A_MOUSE     | Rpl18a      | 60S ribosomal protein L18a                                       | 0,368224  | 0,261719   |
| 965 | ACTA_MOUSE;ACT1 | Acta2;Actg2 | Actin, aortic smooth muscle                                      | 0,347065  | -0,57949   |
| 966 | AP2S1_MOUSE     | Ap2s1       | AP-2 complex subunit sigma                                       | 0,538832  | 1,43843    |
| 967 | HPCL1_MOUSE     | Hpcal1      | Hippocalcin-like protein 1                                       | 1,03545   | -0,684055  |
| 968 | RL23A_MOUSE     | Rpl23a      | 60S ribosomal protein L23a                                       | 0,551517  | -0,232844  |
| 969 | RS6_MOUSE       | Rps6        | 40S ribosomal protein S6                                         | 1,06829   | 0,318949   |
| 970 | MTPN_MOUSE      | Mtpn        | Myotrophin                                                       | 0,588423  | -0,438375  |
| 971 | H4_MOUSE        | Hist1h4a    | Histone H4                                                       | 0,952146  | 1,13535    |
| 972 | VATB2_MOUSE     | Atp6v1b2    | V-type proton ATPase subunit B, brain isoform                    | 0,51545   | 0,228283   |
| 973 | RAB1A_MOUSE     | Rab1A       | Ras-related protein Rab-1A                                       | 0,353636  | 0,298883   |
| 974 | RAN_MOUSE       | Ran         | GTP-binding nuclear protein Ran                                  | 0,125139  | -0,0474598 |
| 975 | RL23_MOUSE      | Rpl23       | 60S ribosomal protein L23                                        | 0,335616  | 0,109594   |
| 976 | RS15_MOUSE      | Rps15       | 40S ribosomal protein S15                                        | 0,398121  | 0,23345    |
| 977 | RS24_MOUSE      | Rps24       | 40S ribosomal protein S24                                        | 0,186372  | -0,0480915 |
| 978 | RS25_MOUSE      | Rps25       | 40S ribosomal protein S25                                        | 0,65025   | 0,298276   |
| 979 | RS26_MOUSE      | Rps26       | 40S ribosomal protein S26                                        | 0,239277  | 0,781213   |
| 980 | RS28_MOUSE      | Rps28       | 40S ribosomal protein S28                                        | 0,378216  | 0,224116   |
| 981 | RS30_MOUSE      | Fau         | 40S ribosomal protein S30                                        | 0,849624  | 0,130791   |
| 982 | ELOB_MOUSE      | Elob        | Elongin-B                                                        | 0,509598  | -0,225853  |
| 983 | GBB1_MOUSE      | Gnb1        | Guanine nucleotide-binding protein G(I)/G(S)/G(T) subunit beta-1 | 0,071411  | -0,131123  |

|      |                  |                  |                                                                  |           |            |
|------|------------------|------------------|------------------------------------------------------------------|-----------|------------|
| 984  | GBB2_MOUSE       | Gnb2             | Guanine nucleotide-binding protein G(I)/G(S)/G(T) subunit beta-2 | 0,371465  | 0,0643772  |
| 985  | RL30_MOUSE       | Rpl30            | 60S ribosomal protein L30                                        | 1,11259   | 0,415338   |
| 986  | CYC_MOUSE        | Cybs             | Cytochrome c, somatic                                            | 0,191745  | 0,0691452  |
| 987  | RL31_MOUSE       | Rpl31            | 60S ribosomal protein L31                                        | 1,21809   | 0,344746   |
| 988  | RS3_MOUSE        | Rps3             | 40S ribosomal protein S3                                         | 0,199254  | -0,0615921 |
| 989  | RL32_MOUSE       | Rpl32            | 60S ribosomal protein L32                                        | 0,0200724 | -0,0161999 |
| 990  | TF2B_MOUSE       | Gtf2b            | Transcription initiation factor IIB                              | 2,11147   | 0,561566   |
| 991  | RL8_MOUSE        | Rpl8             | 60S ribosomal protein L8                                         | 0,81311   | 0,237477   |
| 992  | YBOX1_MOUSE      | Ybx1             | Nuclease-sensitive element-binding protein 1                     | 0,102958  | 0,0665775  |
| 993  | PROF1_MOUSE      | Pfn1             | Profilin-1                                                       | 0,082583  | 0,09342    |
| 994  | RS27A_MOUSE      | Rps27a           | Ubiquitin-40S ribosomal protein S27a                             | 0,984494  | -0,712703  |
| 995  | RL40_MOUSE       | Uba52            | Ubiquitin-60S ribosomal protein L40                              | 0,228231  | 0,123164   |
| 996  | TRA2B_MOUSE      | Tra2b            | Transformer-2 protein homolog beta                               | 0,30008   | 0,145908   |
| 997  | RAC1_MOUSE       | Rac1             | Ras-related C3 botulinum toxin substrate 1                       | 1,85913   | 0,418819   |
| 998  | LIS1_MOUSE       | Pafah1b1         | Platelet-activating factor acetylhydrolase 1B subunit alpha      | 0,289719  | 0,198756   |
| 999  | HSP7C_MOUSE      | Hspa8            | Heat shock cognate 71 kDa protein                                | 0,0601368 | 0,049065   |
| 1000 | TCTP_MOUSE       | Tpt1             | Translationally-controlled tumor protein                         | 0,445394  | 0,36352    |
| 1001 | MPC1_MOUSE       | Mpc1             | Mitochondrial pyruvate carrier 1                                 | 0,0915414 | 0,0850403  |
| 1002 | DNJA1_MOUSE      | Dnaja1           | DnaJ homolog subfamily A member 1                                | 0,120886  | -0,118525  |
| 1003 | CH60_MOUSE       | Hspd1            | 60 kDa heat shock protein, mitochondrial                         | 0,826393  | 0,697746   |
| 1004 | IF4E_MOUSE       | Eif4e            | Eukaryotic translation initiation factor 4E                      | 0,464319  | 0,429221   |
| 1005 | MK01_MOUSE       | Mapk1            | Mitogen-activated protein kinase 1                               | 0,145965  | 0,0834633  |
| 1006 | GNAS1_MOUSE;GN   | Gnas             | Guanine nucleotide-binding protein G(s)                          | 0,266283  | -0,140232  |
| 1007 | 1433Z_MOUSE      | Ywhaz            | 14-3-3 protein zeta/delta                                        | 0,361558  | 0,497781   |
| 1008 | CRNL1_MOUSE      | Crmk1            | Crooked neck-like protein 1                                      | 1,174     | 0,330572   |
| 1009 | HMGB1_MOUSE      | Hmgb1            | High mobility group protein B1                                   | 1,06877   | -0,338321  |
| 1010 | SUMO1_MOUSE      | Sumo1            | Small ubiquitin-related modifier 1                               | 0,553198  | 0,323542   |
| 1011 | IF5A1_MOUSE      | Eif5a            | Eukaryotic translation initiation factor 5A-1                    | 0,748049  | -0,607359  |
| 1012 | CRIP1_MOUSE      | Crip1            | Cysteine-rich protein 1                                          | 0,0447422 | 0,0392677  |
| 1013 | RS17_MOUSE       | Rps17            | 40S ribosomal protein S17                                        | 0,188732  | -0,149403  |
| 1014 | UBC9_MOUSE       | Ube2i            | SUMO-conjugating enzyme UBC9                                     | 0,226909  | -0,266729  |
| 1015 | RS12_MOUSE       | Rps12            | 40S ribosomal protein S12                                        | 0,386313  | 0,733858   |
| 1016 | RS10_MOUSE       | Rps10            | 40S ribosomal protein S10                                        | 0,0966937 | -0,0705441 |
| 1017 | PP2BA_MOUSE      | Ppp3ca           | Serine/threonine-protein phosphatase 2B                          | 0,086299  | 0,12648    |
| 1018 | PHB_MOUSE        | Phb              | Prohibitin                                                       | 0,0279277 | -0,0173332 |
| 1019 | RL22_MOUSE       | Rpl22            | 60S ribosomal protein L22                                        | 0,44644   | 0,434195   |
| 1020 | UB2L3_MOUSE      | Ube2l3           | Ubiquitin-conjugating enzyme E2 L3                               | 0,802828  | -0,23306   |
| 1021 | RACK1_MOUSE      | Rack1            | Receptor of activated protein C kinase 1                         | 0,907166  | 0,287641   |
| 1022 | ACTS_MOUSE       | Acta1            | Actin, alpha skeletal muscle                                     | 0,148196  | 0,0656902  |
| 1023 | 1433T_MOUSE      | Ywhaq            | 14-3-3 protein theta                                             | 0,0419244 | -0,029459  |
| 1024 | TBA4A_MOUSE      | Tuba4a           | Tubulin alpha-4A chain                                           | 0,225195  | -0,159658  |
| 1025 | TBB4B_MOUSE      | Tubb4b           | Tubulin beta-4B chain                                            | 0,799378  | 0,485301   |
| 1026 | TBA1C_MOUSE      | Tuba1c           | Tubulin alpha-1C chain                                           | 0,155773  | 0,0617966  |
| 1027 | H31_MOUSE;H32_IV | Hist1h3a;Hist1h3 | Histone H3.1                                                     | 0,495712  | 1,20259    |
| 1028 | 1433F_MOUSE      | Ywhah            | 14-3-3 protein eta                                               | 0,463849  | -0,243127  |
| 1029 | SBDS_MOUSE       | Sbds             | Ribosome maturation protein SBDS                                 | 1,29528   | 0,190792   |
| 1030 | ASM3A_MOUSE      | Smpdl3a          | Acid sphingomyelinase-like phosphodiesterase 3a                  | 0,526885  | -0,393094  |
| 1031 | IMB1_MOUSE       | Kpnb1            | Importin subunit beta-1                                          | 0,439546  | 0,351617   |
| 1032 | CLC4F_MOUSE      | Clec4f           | C-type lectin domain family 4 member F                           | 1,45086   | 0,996268   |
| 1033 | PSB7_MOUSE       | Psmb7            | Proteasome subunit beta type-7                                   | 0,536075  | 0,106015   |
| 1034 | PALD_MOUSE       | Palld1           | Paladin                                                          | 0,940545  | 0,291098   |
| 1035 | F261_MOUSE       | Plkfb1           | 6-phosphofructo-2-kinase/fructose-2,6-bisphosphatase 1           | 0,181674  | -0,178069  |

|      |                            |          |                                                                        |           |            |
|------|----------------------------|----------|------------------------------------------------------------------------|-----------|------------|
| 1036 | PKN1_MOUSE                 | Pkn1     | Serine/threonine-protein kinase N1                                     | 1,16123   | 0,497885   |
| 1037 | SEPP1_MOUSE                | Selenop  | Selenoprotein P                                                        | 0,724415  | -0,51796   |
| 1038 | SURF6_MOUSE                | Surf6    | Surfeit locus protein 6                                                | 0,723319  | 0,853632   |
| 1039 | VAMP7_MOUSE                | Vamp7    | Vesicle-associated membrane protein 7                                  | 0,055936  | -0,0925522 |
| 1040 | EM55_MOUSE                 | Mpp1     | 55 kDa erythrocyte membrane protein                                    | 0,247198  | 0,136482   |
| 1041 | AUP1_MOUSE                 | Aup1     | Ancient ubiquitous protein 1                                           | 0,836582  | 0,196867   |
| 1042 | PEBP1_MOUSE                | Pebp1    | Phosphatidylethanolamine-binding protein 1                             | 0,463985  | 0,116182   |
| 1043 | STIM1_MOUSE                | Stim1    | Stromal interaction molecule 1                                         | 0,283001  | -0,232172  |
| 1044 | PYRG2_MOUSE                | Ctps2    | CTP synthase 2                                                         | 0,575955  | 0,261981   |
| 1045 | TIAR_MOUSE                 | Tial1    | Nucleolysin TIAR                                                       | 0,734758  | 0,389198   |
| 1046 | HNRH2_MOUSE                | Hnrmph2  | Heterogeneous nuclear ribonucleoprotein H2                             | 0,686669  | 0,722044   |
| 1047 | ROCK1_MOUSE                | Rock1    | Rho-associated protein kinase 1                                        | 0,0357556 | 0,0365665  |
| 1048 | ROCK2_MOUSE                | Rock2    | Rho-associated protein kinase 2                                        | 0,442419  | 0,332943   |
| 1049 | HINT1_MOUSE                | Hint1    | Histidine triad nucleotide-binding protein 1                           | 0,0731062 | 0,116631   |
| 1050 | NFYC_MOUSE                 | Nfyc     | Nuclear transcription factor Y subunit gamma                           | 0,310056  | 0,131784   |
| 1051 | UFD1_MOUSE                 | Ufd1     | Ubiquitin recognition factor in ER-associated degradation protein 1    | 0,467284  | 0,160627   |
| 1052 | ELAV1_MOUSE                | Elav1    | ELAV-like protein 1                                                    | 0,945536  | 0,553499   |
| 1053 | RAD50_MOUSE                | Rad50    | DNA repair protein RAD50                                               | 0,903523  | 0,404807   |
| 1054 | ALS_MOUSE                  | Igfals   | Insulin-like growth factor-binding protein complex acid labile subunit | 0,186549  | 0,235966   |
| 1055 | USP9X_MOUSE                | Usp9x    | Probable ubiquitin carboxyl-terminal hydrolase FAF-X                   | 0,0692802 | -0,045068  |
| 1056 | IDHG1_MOUSE                | Idh3g    | Isocitrate dehydrogenase [NAD] subunit gamma 1, mitochondrial          | 0,0913709 | 0,152875   |
| 1057 | NHRF1_MOUSE                | Slc9a3r1 | Na(+)/H(+) exchange regulatory cofactor NHE-RF1                        | 0,39335   | 0,356051   |
| 1058 | BID_MOUSE                  | Bid      | BH3-interacting domain death agonist                                   | 0,350267  | 0,275871   |
| 1059 | STX4_MOUSE                 | Stx4     | Syntaxin-4                                                             | 0,391091  | 0,36964    |
| 1060 | VASP_MOUSE                 | Vasp     | Vasodilator-stimulated phosphoprotein                                  | 0,637461  | 0,733619   |
| 1061 | SIAE_MOUSE                 | Siae     | Sialate O-acetyltransferase                                            | 0,766805  | 0,401754   |
| 1062 | NACAM_MOUSE                | Naca     | Nascent polypeptide-associated complex subunit alpha                   | 0,489817  | 0,656484   |
| 1063 | IRF3_MOUSE                 | Irf3     | Interferon regulatory factor 3                                         | 0,203465  | -0,229988  |
| 1064 | CASP3_MOUSE                | Casp3    | Caspase-3                                                              | 0,299307  | 0,138949   |
| 1065 | DHB5_MOUSE                 | Akr1c6   | Estradiol 17 beta-dehydrogenase 5                                      | 0,0755161 | -0,0919426 |
| 1066 | DCUP_MOUSE                 | Urod     | Uroporphyrinogen decarboxylase                                         | 0,585837  | 0,314928   |
| 1067 | PYRG1_MOUSE                | Ctps1    | CTP synthase 1                                                         | 0,335203  | 0,296947   |
| 1068 | LYAG_MOUSE                 | Gaa      | Lysosomal alpha-glucosidase                                            | 0,265861  | -0,129582  |
| 1069 | TCPH_MOUSE                 | Cct7     | T-complex protein 1 subunit eta                                        | 1,09223   | 0,276238   |
| 1070 | TCPB_MOUSE                 | Cct2     | T-complex protein 1 subunit beta                                       | 0,382396  | 0,228069   |
| 1071 | TCPD_MOUSE                 | Cct4     | T-complex protein 1 subunit delta                                      | 0,893581  | 0,300241   |
| 1072 | TCPE_MOUSE                 | Cct5     | T-complex protein 1 subunit epsilon                                    | 1,61163   | 0,511111   |
| 1073 | TCPZ_MOUSE                 | Cct6a    | T-complex protein 1 subunit zeta                                       | 0,995818  | 0,367902   |
| 1074 | TCPG_MOUSE                 | Cct3     | T-complex protein 1 subunit gamma                                      | 1,55866   | 0,805191   |
| 1075 | NUCB2_MOUSE                | Nucb2    | Nucleobindin-2                                                         | 0,258437  | 0,398416   |
| 1076 | ATF1_MOUSE;CRE1 Atf1;Creb1 |          | Cyclic AMP-dependent transcription factor ATF-1                        | 0,489037  | -0,389467  |
| 1077 | BGH3_MOUSE                 | Tgfb1    | Transforming growth factor-beta-induced protein ig-h3                  | 0,211497  | 0,273572   |
| 1078 | STIM2_MOUSE                | Stim2    | Stromal interaction molecule 2                                         | 0,759199  | 0,721299   |
| 1079 | WNK1_MOUSE                 | Wnk1     | Serine/threonine-protein kinase WNK1                                   | 1,32958   | 0,667242   |
| 1080 | PHF5A_MOUSE                | Phf5a    | PHD finger-like domain-containing protein 5A                           | 0,259047  | -0,172996  |
| 1081 | RL36A_MOUSE                | Rpl36a   | 60S ribosomal protein L36a                                             | 0,605911  | -0,496797  |
| 1082 | TBG1_MOUSE;TBG;Tubg1;Tubg2 |          | Tubulin gamma-1 chain                                                  | 0,705546  | 0,402715   |
| 1083 | CBX1_MOUSE                 | Cbx1     | Chromobox protein homolog 1                                            | 0,538573  | -0,286384  |
| 1084 | ELOC_MOUSE                 | Eloc     | Elongin-C                                                              | 0,813543  | -0,259258  |
| 1085 | ARF5_MOUSE                 | Arf5     | ADP-ribosylation factor 5                                              | 0,277885  | -0,202694  |
| 1086 | ERH_MOUSE                  | Erh      | Enhancer of rudimentary homolog                                        | 0,0843782 | -0,118852  |
| 1087 | AP2M1_MOUSE                | Ap2m1    | AP-2 complex subunit mu                                                | 0,436631  | 0,30892    |

|      |              |          |                                                               |            |            |
|------|--------------|----------|---------------------------------------------------------------|------------|------------|
| 1088 | RHOG_MOUSE   | Rhog     | Rho-related GTP-binding protein RhoG                          | 1,75651    | 0,617971   |
| 1089 | RL19_MOUSE   | Rpl19    | 60S ribosomal protein L19                                     | 0,622684   | 0,360911   |
| 1090 | SRSF3_MOUSE  | Srsf3    | Serine/arginine-rich splicing factor 3                        | 1,45995    | 0,490135   |
| 1091 | ISC2A_MOUSE  | Isoc2a   | Isochorismatase domain-containing protein 2A                  | 0,565091   | -0,41957   |
| 1092 | IC1_MOUSE    | Serpin1  | Plasma protease C1 inhibitor                                  | 0,465845   | -0,227561  |
| 1093 | PEDF_MOUSE   | Serpinf1 | Pigment epithelium-derived factor                             | 1,33223    | 0,624557   |
| 1094 | NPTN_MOUSE   | Nptn     | Neuroplastin                                                  | 0,546344   | 0,332067   |
| 1095 | MCM2_MOUSE   | Mcm2     | DNA replication licensing factor MCM2                         | 0,974398   | 0,53157    |
| 1096 | MCM6_MOUSE   | Mcm6     | DNA replication licensing factor MCM6                         | 1,08117    | 0,8807     |
| 1097 | PRKDC_MOUSE  | Prkdc    | DNA-dependent protein kinase catalytic subunit                | 0,361535   | 0,289256   |
| 1098 | CSRP2_MOUSE  | Csrp2    | Cysteine and glycine-rich protein 2                           | 0,336915   | 0,204052   |
| 1099 | CSRP1_MOUSE  | Csrp1    | Cysteine and glycine-rich protein 1                           | 0,560418   | -0,499004  |
| 1100 | KHK_MOUSE    | Khk      | Ketohexokinase                                                | 0,371831   | -0,149136  |
| 1101 | NRP1_MOUSE   | Nrp1     | Neuropilin-1                                                  | 1,85797    | 1,46364    |
| 1102 | RS3A_MOUSE   | Rps3a    | 40S ribosomal protein S3a                                     | 0,859484   | 0,196778   |
| 1103 | S10AD_MOUSE  | S100a13  | Protein S100-A13                                              | 1,20084    | -0,220601  |
| 1104 | SPS2_MOUSE   | Seps2    | Selenide, water dikinase 2                                    | 0,0903354  | -0,0885006 |
| 1105 | EVI5_MOUSE   | Evi5     | Ecotropic viral integration site 5 protein                    | 0,789205   | 0,347976   |
| 1106 | AT1B3_MOUSE  | Atp1b3   | Sodium/potassium-transporting ATPase subunit beta-3           | 0,458821   | -0,506544  |
| 1107 | PSME1_MOUSE  | Psme1    | Proteasome activator complex subunit 1                        | 0,0408598  | -0,0195976 |
| 1108 | PSME2_MOUSE  | Psme2    | Proteasome activator complex subunit 2                        | 0,0701529  | -0,0425251 |
| 1109 | FRG1_MOUSE   | Frg1     | Protein FRG1                                                  | 0,0430287  | -0,0643356 |
| 1110 | G3BP2_MOUSE  | G3bp2    | Ras GTPase-activating protein-binding protein 2               | 0,336561   | 0,238861   |
| 1111 | ANX11_MOUSE  | Anxa11   | Annexin A11                                                   | 0,227491   | -0,0798107 |
| 1112 | DNL13_MOUSE  | Lig3     | DNA ligase 3                                                  | 1,05028    | 0,274915   |
| 1113 | VPS45_MOUSE  | Vps45    | Vacuolar protein sorting-associated protein 45                | 0,00846605 | 0,00720558 |
| 1114 | ANXA4_MOUSE  | Anxa4    | Annexin A4                                                    | 0,786495   | 0,206748   |
| 1115 | MPRIIP_MOUSE | Mrip     | Myosin phosphatase Rho-interacting protein                    | 0,908767   | 0,453164   |
| 1116 | AMPN_MOUSE   | Anpep    | Aminopeptidase N                                              | 0,527982   | 0,318377   |
| 1117 | ATP5J_MOUSE  | Atp5pf   | ATP synthase-coupling factor 6, mitochondrial                 | 0,263626   | -0,169563  |
| 1118 | BOP1_MOUSE   | Bop1     | Ribosome biogenesis protein BOP1                              | 1,26566    | 0,351085   |
| 1119 | RS5_MOUSE    | Rps5     | 40S ribosomal protein S5                                      | 0,152957   | -0,0800312 |
| 1120 | COQ7_MOUSE   | Coq7     | 5-demethoxyubiquinone hydroxylase, mitochondrial              | 0,119074   | 0,0968204  |
| 1121 | EYA3_MOUSE   | Eya3     | Eyes absent homolog 3                                         | 0,0772602  | -0,103836  |
| 1122 | GSH1_MOUSE   | Gclc     | Glutamate--cysteine ligase catalytic subunit                  | 1,53964    | 0,735316   |
| 1123 | SMRC1_MOUSE  | Smarcc1  | SWI/SNF complex subunit SMARCC1                               | 0,667756   | -0,949657  |
| 1124 | FMO3_MOUSE   | Fmo3     | Dimethylaniline monooxygenase [N-oxide-forming] 3             | 0,952057   | -0,521083  |
| 1125 | CPT1A_MOUSE  | Cpt1a    | Carnitine O-palmitoyltransferase 1, liver isoform             | 0,45667    | -0,594932  |
| 1126 | RPB3_MOUSE   | Poli2c   | DNA-directed RNA polymerase II subunit RPB3                   | 0,230977   | 0,266998   |
| 1127 | WBP2_MOUSE   | Wbp2     | WW domain-binding protein 2                                   | 0,388119   | 0,29697    |
| 1128 | THUM3_MOUSE  | Thumpd3  | THUMP domain-containing protein 3                             | 1,53495    | 0,537134   |
| 1129 | CRY1_MOUSE   | Cry1     | Cryptochrome-1                                                | 0,129492   | 0,107927   |
| 1130 | XRN1_MOUSE   | Xrn1     | 5'-3' exoribonuclease 1                                       | 0,084519   | 0,10253    |
| 1131 | CXAR_MOUSE   | Cxadr    | Coxsackievirus and adenovirus receptor homolog                | 0,414544   | 0,109221   |
| 1132 | FUMH_MOUSE   | Fh       | Fumarate hydratase, mitochondrial                             | 0,656427   | -0,411333  |
| 1133 | PLPL9_MOUSE  | Pla2g6   | 85/88 kDa calcium-independent phospholipase A2                | 0,702924   | 0,77163    |
| 1134 | CATC_MOUSE   | Ctsc     | Dipeptidyl peptidase 1                                        | 0,752126   | -0,370078  |
| 1135 | AN32E_MOUSE  | Anp32e   | Acidic leucine-rich nuclear phosphoprotein 32 family member E | 0,619466   | 0,460549   |
| 1136 | LYPA1_MOUSE  | Lypla1   | Acyl-protein thioesterase 1                                   | 0,16245    | -0,0664707 |
| 1137 | G3BP1_MOUSE  | G3bp1    | Ras GTPase-activating protein-binding protein 1               | 0,0440298  | -0,0129841 |
| 1138 | CASP7_MOUSE  | Casp7    | Caspase-7                                                     | 1,13018    | -0,614421  |
| 1139 | FMO5_MOUSE   | Fmo5     | Dimethylaniline monooxygenase [N-oxide-forming] 5             | 0,0571319  | -0,0397041 |

|      |             |           |                                                                  |            |             |
|------|-------------|-----------|------------------------------------------------------------------|------------|-------------|
| 1140 | LAMA4_MOUSE | Lama4     | Laminin subunit alpha-4                                          | 0,123244   | -0,111898   |
| 1141 | KTHY_MOUSE  | Dtymk     | Thymidylate kinase                                               | 1,02899    | -0,223291   |
| 1142 | DAB2_MOUSE  | Dab2      | Disabled homolog 2                                               | 0,176448   | -0,109771   |
| 1143 | SHC1_MOUSE  | Shc1      | SHC-transforming protein 1                                       | 0,41495    | 0,320743    |
| 1144 | ARVC_MOUSE  | Arvcf     | Armadillo repeat protein                                         | 0,952548   | 0,549466    |
| 1145 | TBB5_MOUSE  | Tubb5     | Tubulin beta-5 chain                                             | 0,620391   | 0,221047    |
| 1146 | GFRP_MOUSE  | Gchfr     | GTP cyclohydrolase 1 feedback regulatory protein                 | 0,159515   | -0,0947067  |
| 1147 | PSB4_MOUSE  | Psmb4     | Proteasome subunit beta type-4                                   | 0,169809   | 0,136753    |
| 1148 | RLA2_MOUSE  | Rplp2     | 60S acidic ribosomal protein P2                                  | 0,547803   | -0,34024    |
| 1149 | QCR6_MOUSE  | Uqcrh     | Cytochrome b-c1 complex subunit 6, mitochondrial                 | 0,604251   | 0,402778    |
| 1150 | PRDX5_MOUSE | Prdx5     | Peroxiredoxin-5, mitochondrial                                   | 1,59725    | 0,345524    |
| 1151 | XDH_MOUSE   | Xdh       | Xanthine dehydrogenase/oxidase                                   | 0,624322   | 0,366488    |
| 1152 | F8I2_MOUSE  | F8a1      | Factor VIII intron 22 protein                                    | 0,162965   | 0,142015    |
| 1153 | IL6RB_MOUSE | Il6st     | Interleukin-6 receptor subunit beta                              | 1,4576     | 0,563505    |
| 1154 | G6PD1_MOUSE | G6pdx     | Glucose-6-phosphate 1-dehydrogenase X                            | 0,816994   | 0,45404     |
| 1155 | APOA1_MOUSE | Apoa1     | Apolipoprotein A-I                                               | 0,189982   | 0,232864    |
| 1156 | RET4_MOUSE  | Rbp4      | Retinol-binding protein 4                                        | 0,884551   | 0,618248    |
| 1157 | A1AT4_MOUSE | Serpina1d | Alpha-1-antitrypsin 1-4                                          | 0,237954   | -0,101341   |
| 1158 | A1AT5_MOUSE | Serpina1e | Alpha-1-antitrypsin 1-5                                          | 1,02456    | 1,8324      |
| 1159 | TYY1_MOUSE  | Yy1       | Transcriptional repressor protein YY1                            | 0,184106   | 0,2281      |
| 1160 | RET1_MOUSE  | Rbp1      | Retinol-binding protein 1                                        | 0,501533   | 0,350504    |
| 1161 | HNRL2_MOUSE | Hnmpul2   | Heterogeneous nuclear ribonucleoprotein U-like protein 2         | 0,709613   | 0,279716    |
| 1162 | CO1A2_MOUSE | Col1a2    | Collagen alpha-2(I) chain                                        | 0,00236105 | -0,00585289 |
| 1163 | HMDH_MOUSE  | Hmgcr     | 3-hydroxy-3-methylglutaryl-coenzyme A reductase                  | 0,319715   | -0,645862   |
| 1164 | EGFR_MOUSE  | Egfr      | Epidermal growth factor receptor                                 | 0,103655   | -0,101654   |
| 1165 | APOH_MOUSE  | Apoh      | Beta-2-glycoprotein 1                                            | 0,669361   | 0,294164    |
| 1166 | SC23A_MOUSE | Sec23a    | Protein transport protein Sec23A                                 | 0,632073   | -0,23138    |
| 1167 | RSU1_MOUSE  | Rsu1      | Ras suppressor protein 1                                         | 0,149837   | 0,0575222   |
| 1168 | NDKB_MOUSE  | Nme2      | Nucleoside diphosphate kinase B                                  | 0,492713   | 0,292206    |
| 1169 | TERA_MOUSE  | Vcp       | Transitional endoplasmic reticulum ATPase                        | 0,68336    | 0,381658    |
| 1170 | UBA1_MOUSE  | Uba1      | Ubiquitin-like modifier-activating enzyme 1                      | 0,535454   | -0,147116   |
| 1171 | CTNB1_MOUSE | Ctnnb1    | Catenin beta-1                                                   | 0,465919   | 0,254321    |
| 1172 | PLAK_MOUSE  | Jup       | Junction plakoglobin                                             | 0,00755789 | -0,00922432 |
| 1173 | ANK1_MOUSE  | Ank1      | Ankyrin-1                                                        | 0,407021   | 0,454671    |
| 1174 | NFIA_MOUSE  | Nfia      | Nuclear factor 1 A-type                                          | 0,697715   | -0,572563   |
| 1175 | CO6A2_MOUSE | Col6a2    | Collagen alpha-2(VI) chain                                       | 0,00101957 | -0,00117188 |
| 1176 | NUCB1_MOUSE | Nucb1     | Nucleobindin-1                                                   | 0,0475837  | 0,0859768   |
| 1177 | MARK3_MOUSE | Mark3     | MAP/microtubule affinity-regulating kinase 3                     | 0,130338   | -0,0924965  |
| 1178 | GRB7_MOUSE  | Grb7      | Growth factor receptor-bound protein 7                           | 0,780184   | 0,521473    |
| 1179 | GALT_MOUSE  | Galt      | Galactose-1-phosphate uridylyltransferase                        | 0,179613   | -0,0964237  |
| 1180 | ATPA_MOUSE  | Atp5f1a   | ATP synthase subunit alpha, mitochondrial                        | 0,0324449  | -0,0244289  |
| 1181 | CHLE_MOUSE  | Bche      | Cholinesterase                                                   | 0,109109   | 0,050177    |
| 1182 | SPA3M_MOUSE | Serpina3m | Serine protease inhibitor A3M                                    | 0,142492   | 0,211989    |
| 1183 | PFD6_MOUSE  | Pfdn6     | Prefoldin subunit 6                                              | 0,500581   | 0,264215    |
| 1184 | E2AK2_MOUSE | Eif2ak2   | Interferon-induced, double-stranded RNA-activated protein kinase | 2,37351    | 0,893211    |
| 1185 | TF65_MOUSE  | Rela      | Transcription factor p65                                         | 0,474178   | 0,697023    |
| 1186 | KCRB_MOUSE  | Ckb       | Creatine kinase B-type                                           | 0,34339    | 0,209767    |
| 1187 | ASM_MOUSE   | Smpd1     | Sphingomyelin phosphodiesterase                                  | 1,05603    | -0,543592   |
| 1188 | YES_MOUSE   | Yes1      | Tyrosine-protein kinase Yes                                      | 0,767819   | 0,343647    |
| 1189 | TOP1_MOUSE  | Top1      | DNA topoisomerase 1                                              | 1,85       | 0,228048    |
| 1190 | CO6A1_MOUSE | Col6a1    | Collagen alpha-1(VI) chain                                       | 0,083443   | 0,0980663   |
| 1191 | APOC2_MOUSE | Apoc2     | Apolipoprotein C-II                                              | 0,370876   | 0,289103    |

|      |             |          |                                                                |           |            |
|------|-------------|----------|----------------------------------------------------------------|-----------|------------|
| 1192 | PPA5_MOUSE  | Acp5     | Tartrate-resistant acid phosphatase type 5                     | 2,16702   | 0,766495   |
| 1193 | RCN1_MOUSE  | Rcn1     | Reticulocalbin-1                                               | 0,619207  | -0,516655  |
| 1194 | CP2E1_MOUSE | Cyp2e1   | Cytochrome P450 2E1                                            | 0,503709  | -0,456622  |
| 1195 | MARK2_MOUSE | Mark2    | Serine/threonine-protein kinase MARK2                          | 0,908969  | 0,229584   |
| 1196 | PGBM_MOUSE  | Hspg2    | Basement membrane-specific heparan sulfate                     | 0,31316   | 0,13669    |
| 1197 | FABP5_MOUSE | Fabp5    | Fatty acid-binding protein 5                                   | 0,2637    | -0,297083  |
| 1198 | GCH1_MOUSE  | Gch1     | GTP cyclohydrolase 1                                           | 0,23829   | -0,122496  |
| 1199 | PYC_MOUSE   | Pc       | Pyruvate carboxylase, mitochondrial                            | 0,469268  | 0,24603    |
| 1200 | LARP7_MOUSE | Larp7    | La-related protein 7                                           | 0,693896  | 0,144197   |
| 1201 | IF2P_MOUSE  | Eif5b    | Eukaryotic translation initiation factor 5B                    | 0,623421  | -0,419026  |
| 1202 | CAB39_MOUSE | Cab39    | Calcium-binding protein 39                                     | 0,598496  | -0,27179   |
| 1203 | PTN2_MOUSE  | Ptpn2    | Tyrosine-protein phosphatase non-receptor type 2               | 1,65136   | 1,78642    |
| 1204 | ATP5I_MOUSE | Atp5me   | ATP synthase subunit e, mitochondrial                          | 0,478748  | 0,129946   |
| 1205 | CLUS_MOUSE  | Clu      | Clusterin                                                      | 0,87946   | 0,730743   |
| 1206 | ANXA7_MOUSE | Anxa7    | Annexin A7                                                     | 1,43946   | 0,366464   |
| 1207 | MPRI_MOUSE  | Igf2r    | Cation-independent mannose-6-phosphate receptor                | 0,263046  | 0,218198   |
| 1208 | ACADS_MOUSE | Acads    | Short-chain specific acyl-CoA dehydrogenase, mitochondrial     | 0,957331  | 0,243199   |
| 1209 | AMBP_MOUSE  | Ambp     | Protein AMBP                                                   | 0,687545  | 0,264369   |
| 1210 | LG3BP_MOUSE | Lgals3bp | Galectin-3-binding protein                                     | 1,21183   | 0,846291   |
| 1211 | F13B_MOUSE  | F13b     | Coagulation factor XIII B chain                                | 0,660334  | 0,465073   |
| 1212 | CNN2_MOUSE  | Cnn2     | Calponin-2                                                     | 0,613331  | 0,306371   |
| 1213 | DMWD_MOUSE  | Dmwd     | Dystrophia myotonica WD repeat-containing protein              | 1,91655   | 0,999999   |
| 1214 | LYAR_MOUSE  | Lyar     | Cell growth-regulating nucleolar protein                       | 0,524818  | -0,431332  |
| 1215 | CD36_MOUSE  | Cd36     | Platelet glycoprotein 4                                        | 0,882212  | 0,420734   |
| 1216 | SSRP1_MOUSE | Ssrp1    | FACT complex subunit SSRP1                                     | 0,155255  | 0,150812   |
| 1217 | B4GN1_MOUSE | B4galnt1 | Beta-1,4 N-acetylgalactosaminyltransferase 1                   | 0,612233  | -0,292588  |
| 1218 | INF2_MOUSE  | Inf2     | Inverted formin-2                                              | 0,285669  | -0,168927  |
| 1219 | ZCH18_MOUSE | Zc3h18   | Zinc finger CCCH domain-containing protein 18                  | 0,0440094 | 0,0620926  |
| 1220 | RBM15_MOUSE | Rbm15    | RNA-binding protein 15                                         | 0,197146  | 0,202017   |
| 1221 | PP4R2_MOUSE | Ppp4r2   | Serine/threonine-protein phosphatase 4 regulatory subunit 2    | 0,995843  | 0,488546   |
| 1222 | PSA_MOUSE   | Npepps   | Puromycin-sensitive aminopeptidase                             | 0,766179  | 0,484448   |
| 1223 | PEPD_MOUSE  | Pepd     | Xaa-Pro dipeptidase                                            | 0,0263474 | -0,0126221 |
| 1224 | RELCH_MOUSE | Relch    | RAB11-binding protein RELCH                                    | 0,787197  | 0,624789   |
| 1225 | FA83H_MOUSE | Fam83h   | Protein FAM83H                                                 | 0,0542656 | 0,0511635  |
| 1226 | RUSD2_MOUSE | Rpusd2   | RNA pseudouridylate synthase domain-containing protein 2       | 0,0304065 | 0,0405983  |
| 1227 | RUSD3_MOUSE | Rpusd3   | Mitochondrial mRNA pseudouridine synthase Rpusd3               | 0,33948   | 0,385613   |
| 1228 | PTCD3_MOUSE | Ptcd3    | Pentatricopeptide repeat domain-containing protein 3           | 0,0826111 | 0,0542076  |
| 1229 | MOCOS_MOUSE | Mocos    | Molybdenum cofactor sulfurase                                  | 0,364508  | 0,32368    |
| 1230 | SYAM_MOUSE  | Aars2    | Alanine--tRNA ligase, mitochondrial                            | 0,215257  | 0,166898   |
| 1231 | ACSS3_MOUSE | Acss3    | Acyl-CoA synthetase short-chain family member 3, mitochondrial | 0,285537  | 0,19015    |
| 1232 | NSUN2_MOUSE | Nsun2    | tRNA (cytosine(34)-C(5))-methyltransferase                     | 0,434323  | 0,0975731  |
| 1233 | URAD_MOUSE  | Urad     | 2-oxo-4-hydroxy-4-carboxy-5-ureidoimidazole decarboxylase      | 0,138384  | 0,120243   |
| 1234 | PAR14_MOUSE | Parp14   | Protein mono-ADP-ribosyltransferase PARP14                     | 0,494694  | 0,31038    |
| 1235 | PSD3_MOUSE  | Psd3     | PH and SEC7 domain-containing protein 3                        | 0,395998  | 0,385712   |
| 1236 | P4K2A_MOUSE | Pi4k2a   | Phosphatidylinositol 4-kinase type 2-alpha                     | 0,16523   | -0,146598  |
| 1237 | HSDL2_MOUSE | Hsd12    | Hydroxysteroid dehydrogenase-like protein 2                    | 2,10233   | 1,04152    |
| 1238 | C163A_MOUSE | Cd163    | Scavenger receptor cysteine-rich type 1 protein M130           | 0,408815  | -0,611503  |
| 1239 | CNNM3_MOUSE | Cnm3     | Metal transporter CNNM3                                        | 0,06794   | -0,0989683 |
| 1240 | OSBP1_MOUSE | Osbp     | Oxysterol-binding protein 1                                    | 0,279269  | 0,0932957  |
| 1241 | COL11_MOUSE | Colec11  | Collectin-11                                                   | 0,870047  | 0,601713   |
| 1242 | HMHA1_MOUSE | Arhgap45 | Rho GTPase-activating protein 45                               | 1,06138   | -0,639313  |
| 1243 | RM10_MOUSE  | Mrpl10   | 39S ribosomal protein L10, mitochondrial                       | 0,532585  | 0,185496   |

|      |             |          |                                                                |           |            |
|------|-------------|----------|----------------------------------------------------------------|-----------|------------|
| 1244 | PATL1_MOUSE | Patl1    | Protein PAT1 homolog 1                                         | 0,21726   | 0,206663   |
| 1245 | FAHD2_MOUSE | Fahd2    | Fumarylacetoacetate hydrolase domain-containing protein 2A     | 0,185566  | 0,175338   |
| 1246 | CUL4A_MOUSE | Cul4a    | Cullin-4A                                                      | 0,918651  | -0,17667   |
| 1247 | ABRX2_MOUSE | Abraxas2 | BRISC complex subunit Abraxas 2                                | 0,339354  | 0,166691   |
| 1248 | KHDC4_MOUSE | Khdc4    | KH homology domain-containing protein 4                        | 1,2389    | 0,630685   |
| 1249 | PPR21_MOUSE | Ppp1r21  | Protein phosphatase 1 regulatory subunit 21                    | 0,0211914 | -0,0259899 |
| 1250 | STT3B_MOUSE | Stt3b    | Dolichyl-diphosphooligosaccharide--protein glycosyltransferase | 0,155304  | 0,256131   |
| 1251 | HP1B3_MOUSE | Hp1bp3   | Heterochromatin protein 1-binding protein 3                    | 0,0626201 | -0,051107  |
| 1252 | F107B_MOUSE | Fam107b  | Protein FAM107B                                                | 0,536681  | 0,157964   |
| 1253 | EEPD1_MOUSE | Eepd1    | Endonuclease/exonuclease/phosphatase                           | 0,120335  | 0,103101   |
| 1254 | ML12B_MOUSE | My112b   | Myosin regulatory light chain 12B                              | 0,110991  | 0,174443   |
| 1255 | AASD1_MOUSE | Aarsd1   | Alanyl-tRNA editing protein Aarsd1                             | 0,865295  | 0,372844   |
| 1256 | GUAA_MOUSE  | Gmps     | GMP synthase [glutamine-hydrolyzing]                           | 0,164502  | 0,136295   |
| 1257 | METK2_MOUSE | Mat2a    | S-adenosylmethionine synthase isoform type-2                   | 1,04845   | 0,296633   |
| 1258 | TPC13_MOUSE | Trappc13 | Trafficking protein particle complex subunit 13                | 1,22374   | 0,557424   |
| 1259 | PDE12_MOUSE | Pde12    | 2',5'-phosphodiesterase 12                                     | 0,434295  | 0,595287   |
| 1260 | ZC3HF_MOUSE | Zc3h15   | Zinc finger CCCH domain-containing protein 15                  | 0,348031  | 0,158199   |
| 1261 | SNUT2_MOUSE | Usp39    | U4/U6.U5 tri-snRNP-associated protein 2                        | 0,649171  | 0,968504   |
| 1262 | L2GL2_MOUSE | Ligl2    | Lethal(2) giant larvae protein homolog 2                       | 0,651129  | 0,473741   |
| 1263 | FA98A_MOUSE | Fam98a   | Protein FAM98A                                                 | 0,30923   | -0,400238  |
| 1264 | SMCA4_MOUSE | Smarca4  | Transcription activator BRG1                                   | 0,28238   | 0,169258   |
| 1265 | NLRX1_MOUSE | Nlr1     | NLR family member X1                                           | 0,236019  | 0,0810276  |
| 1266 | PRC2C_MOUSE | Prrc2c   | Protein PRRC2C                                                 | 0,712637  | 0,349232   |
| 1267 | ECHD2_MOUSE | Echdc2   | Enoyl-CoA hydratase domain-containing protein 2, mitochondrial | 0,0934369 | 0,079974   |
| 1268 | SCRN3_MOUSE | Scrn3    | Secernin-3                                                     | 0,702039  | 0,338531   |
| 1269 | XYLB_MOUSE  | Xylb     | Xylulose kinase                                                | 0,600475  | 0,479066   |
| 1270 | EXOC5_MOUSE | Exoc5    | Exocyst complex component 5                                    | 0,121269  | 0,107022   |
| 1271 | FXRD1_MOUSE | Foxred1  | FAD-dependent oxidoreductase domain-containing protein 1       | 0,217651  | -0,242158  |
| 1272 | HXK3_MOUSE  | Hk3      | Hexokinase-3                                                   | 0,158932  | 0,155536   |
| 1273 | TAM41_MOUSE | Tamm41   | Phosphatidate cytidyltransferase, mitochondrial                | 0,182305  | -0,0877056 |
| 1274 | UAP1L_MOUSE | Uap11    | UDP-N-acetylhexosamine pyrophosphorylase-like protein 1        | 1,13553   | 0,88073    |
| 1275 | SRSF6_MOUSE | Srsf6    | Serine/arginine-rich splicing factor 6                         | 0,849479  | 0,303596   |
| 1276 | TRM1_MOUSE  | Trmt1    | tRNA (guanine(26)-N(2))-dimethyltransferase                    | 0,715349  | 0,568663   |
| 1277 | PSMD1_MOUSE | Psm1     | 26S proteasome non-ATPase regulatory subunit 1                 | 1,21252   | 0,370178   |
| 1278 | DHYS_MOUSE  | Dhps     | Deoxyhypusine synthase                                         | 0,140487  | -0,111684  |
| 1279 | SMYD5_MOUSE | Smyd5    | SET and MYND domain-containing protein 5                       | 0,2258    | 0,444133   |
| 1280 | ESYT2_MOUSE | Esyt2    | Extended synaptotagmin-2                                       | 1,57653   | -0,852337  |
| 1281 | DHR11_MOUSE | Dhrs11   | Dehydrogenase/reductase SDR family member 11                   | 0,385641  | -0,109931  |
| 1282 | TBD2B_MOUSE | Tbc1d2b  | TBC1 domain family member 2B                                   | 1,06623   | 1,02212    |
| 1283 | RAIN_MOUSE  | Rasip1   | Ras-interacting protein 1                                      | 0,124257  | 0,120311   |
| 1284 | FUBP2_MOUSE | Khsp     | Far upstream element-binding protein 2                         | 1,73086   | 0,380115   |
| 1285 | TRADD_MOUSE | Tradd    | Tumor necrosis factor receptor type 1                          | 1,35951   | 0,597411   |
| 1286 | SYRM_MOUSE  | Rars2    | Probable arginine--tRNA ligase, mitochondrial                  | 0,110968  | 0,13664    |
| 1287 | DDB1_MOUSE  | Ddb1     | DNA damage-binding protein 1                                   | 0,8232    | 0,225137   |
| 1288 | SYVM_MOUSE  | Vars2    | Valine--tRNA ligase, mitochondrial                             | 0,0331981 | 0,0204647  |
| 1289 | SC24A_MOUSE | Sec24a   | Protein transport protein Sec24A                               | 0,1464    | -0,0827675 |
| 1290 | CTU2_MOUSE  | Ctu2     | Cytoplasmic tRNA 2-thiolation protein 2                        | 1,61035   | 0,429623   |
| 1291 | BRE1B_MOUSE | Rnf40    | E3 ubiquitin-protein ligase BRE1B                              | 0,0354901 | -0,0274719 |
| 1292 | HECD3_MOUSE | Hectd3   | E3 ubiquitin-protein ligase HECTD3                             | 0,173514  | 0,186105   |
| 1293 | CMPK2_MOUSE | Cmpk2    | UMP-CMP kinase 2, mitochondrial                                | 1,36656   | 0,470609   |
| 1294 | ESYT1_MOUSE | Esyt1    | Extended synaptotagmin-1                                       | 0,248977  | -0,0927032 |
| 1295 | LBR_MOUSE   | Lbr      | Delta(14)-sterol reductase LBR                                 | 0,077366  | 0,0809948  |



|      |                                 |          |                                                                 |            |             |
|------|---------------------------------|----------|-----------------------------------------------------------------|------------|-------------|
| 1296 | PCL11_MOUSE                     | Pid1     | PTB-containing, cubilin and LRP1-interacting protein            | 1,12221    | -1,47058    |
| 1297 | OTUL_MOUSE                      | Otulin   | Ubiquitin thioesterase otulin                                   | 0,252634   | 0,364414    |
| 1298 | TTL12_MOUSE                     | Ttl12    | Tubulin--tyrosine ligase-like protein 12                        | 0,559571   | 0,441391    |
| 1299 | TRAD1_MOUSE                     | Trafd1   | TRAF-type zinc finger domain-containing protein 1               | 0,571338   | 0,638845    |
| 1300 | YIPF3_MOUSE                     | Yipf3    | Protein YIPF3                                                   | 0,634565   | 0,401754    |
| 1301 | UBE2Z_MOUSE                     | Ube2z    | Ubiquitin-conjugating enzyme E2 Z                               | 1,09483    | 0,411574    |
| 1302 | PUF60_MOUSE                     | Puf60    | Poly(U)-binding-splicing factor PUF60                           | 0,385571   | 0,129522    |
| 1303 | AGT2_MOUSE                      | Agxt2    | Alanine--glyoxylate aminotransferase 2, mitochondrial           | 0,188655   | 0,105821    |
| 1304 | TM10C_MOUSE                     | Trmt10c  | tRNA methyltransferase 10 homolog C                             | 0,310764   | -0,178244   |
| 1305 | EI3JA_MOUSE;EI3JL Eif3j1;Eif3j2 |          | Eukaryotic translation initiation factor 3 subunit J-A          | 0,411276   | -0,235991   |
| 1306 | HDHD2_MOUSE                     | Hdhd2    | Haloacid dehalogenase-like hydrolase                            | 0,32329    | -0,306723   |
| 1307 | MCR11_MOUSE                     | Mcrip1   | Mapk-regulated corepressor-interacting protein 1                | 1,37047    | -0,460471   |
| 1308 | DIP2B_MOUSE                     | Dip2b    | Disco-interacting protein 2 homolog B                           | 0,988215   | 0,404195    |
| 1309 | SPTCS_MOUSE                     | Spg11    | Spatacsin                                                       | 0,781032   | 0,434568    |
| 1310 | SNX27_MOUSE                     | Snx27    | Sorting nexin-27                                                | 0,276801   | 0,241193    |
| 1311 | NDST1_MOUSE                     | Ndst1    | Bifunctional heparan sulfate N-deacetylase/N-sulfotransferase 1 | 0,583319   | 0,382758    |
| 1312 | HAP28_MOUSE                     | Pdap1    | 28 kDa heat- and acid-stable phosphoprotein                     | 1,13202    | 0,687075    |
| 1313 | BABA1_MOUSE                     | Babam1   | BRISC and BRCA1-A complex member 1                              | 0,761938   | 0,264867    |
| 1314 | RHG17_MOUSE                     | Arhgap17 | Rho GTPase-activating protein 17                                | 1,01588    | 2,29145     |
| 1315 | PKHA7_MOUSE                     | Plekha7  | Pleckstrin homology domain-containing family A member 7         | 0,220172   | -0,174586   |
| 1316 | DTX3L_MOUSE                     | Dtx3l    | E3 ubiquitin-protein ligase DTX3L                               | 1,68277    | 0,718784    |
| 1317 | NDUB6_MOUSE                     | Ndufb6   | NADH dehydrogenase [ubiquinone] 1 beta subcomplex subunit 6     | 1,40442    | -0,651532   |
| 1318 | EDC4_MOUSE                      | Edc4     | Enhancer of mRNA-decapping protein 4                            | 0,450821   | 0,161314    |
| 1319 | UBP19_MOUSE                     | Usp19    | Ubiquitin carboxyl-terminal hydrolase 19                        | 1,09933    | 0,291514    |
| 1320 | RMD3_MOUSE                      | Rmdn3    | Regulator of microtubule dynamics protein 3                     | 0,189106   | -0,097644   |
| 1321 | SMU1_MOUSE                      | Smu1     | WD40 repeat-containing protein SMU1                             | 0,106164   | 0,0524639   |
| 1322 | ARGL1_MOUSE                     | Arglu1   | Arginine and glutamate-rich protein 1                           | 0,181096   | -0,247371   |
| 1323 | MCCB_MOUSE                      | Mccc2    | Methylcrotonoyl-CoA carboxylase beta chain, mitochondrial       | 0,360739   | 0,444063    |
| 1324 | SPG7_MOUSE                      | Spg7     | Paraplegin                                                      | 0,26835    | 0,190906    |
| 1325 | GPD1L_MOUSE                     | Gpd1l    | Glycerol-3-phosphate dehydrogenase 1-like protein               | 0,712172   | -0,399483   |
| 1326 | PARP3_MOUSE                     | Parp3    | Protein mono-ADP-ribosyltransferase PARP3                       | 0,718808   | 0,536603    |
| 1327 | COG7_MOUSE                      | Cog7     | Conserved oligomeric Golgi complex subunit 7                    | 0,889188   | -0,615666   |
| 1328 | PP1R7_MOUSE                     | Ppp1r7   | Protein phosphatase 1 regulatory subunit 7                      | 0,233964   | 0,140891    |
| 1329 | WASC4_MOUSE                     | Washc4   | WASH complex subunit 4                                          | 0,0695338  | 0,0411556   |
| 1330 | AFG2H_MOUSE                     | Spata5   | ATPase family protein 2 homolog                                 | 0,545249   | -0,824794   |
| 1331 | COBL1_MOUSE                     | Cobl1    | Cordon-bleu protein-like 1                                      | 0,187716   | 0,158698    |
| 1332 | PP12C_MOUSE                     | Ppp1r12c | Protein phosphatase 1 regulatory subunit 12C                    | 0,238942   | 0,124968    |
| 1333 | HDGR2_MOUSE                     | Hdgfl2   | Hepatoma-derived growth factor-related protein 2                | 0,0971306  | 0,0595612   |
| 1334 | EMAL4_MOUSE                     | Eml4     | Echinoderm microtubule-associated protein-like 4                | 0,475451   | 0,200934    |
| 1335 | UBP30_MOUSE                     | Usp30    | Ubiquitin carboxyl-terminal hydrolase 30                        | 0,0848293  | 0,12725     |
| 1336 | ACSM3_MOUSE                     | Acsm3    | Acyl-coenzyme A synthetase ACSM3, mitochondrial                 | 0,299335   | 0,0707195   |
| 1337 | QORL2_MOUSE                     | Cryz12   | Quinone oxidoreductase-like protein 2                           | 0,488865   | -0,402311   |
| 1338 | ZCCHV_MOUSE                     | Zc3hav1  | Zinc finger CCCH-type antiviral protein 1                       | 1,56015    | 0,37578     |
| 1339 | PRRC1_MOUSE                     | Prrc1    | Protein PRRC1                                                   | 0,072414   | 0,0156414   |
| 1340 | SC31A_MOUSE                     | Sec31a   | Protein transport protein Sec31A                                | 1,57296    | 0,49744     |
| 1341 | PXDN_MOUSE                      | Pxdn     | Peroxidasin homolog                                             | 0,169995   | 0,205529    |
| 1342 | IQGA2_MOUSE                     | Iqgap2   | Ras GTPase-activating-like protein IQGAP2                       | 0,165624   | -0,137827   |
| 1343 | SYTM_MOUSE                      | Tars2    | Threonine--tRNA ligase, mitochondrial                           | 0,797133   | 0,42735     |
| 1344 | TGFA1_MOUSE                     | Tgfbra1  | Transforming growth factor-beta receptor-associated protein 1   | 0,424757   | 0,185596    |
| 1345 | SLMAP_MOUSE                     | Slimap   | Sarcolemmal membrane-associated protein                         | 0,556825   | 0,262462    |
| 1346 | ACSF3_MOUSE                     | Acsf3    | Malonate--CoA ligase ACSF3, mitochondrial                       | 0,950426   | 0,25889     |
| 1347 | CCD51_MOUSE                     | Ccdc51   | Coiled-coil domain-containing protein 51                        | 0,00371164 | -0,00498581 |

|      |             |          |                                                              |            |             |
|------|-------------|----------|--------------------------------------------------------------|------------|-------------|
| 1348 | DIK2A_MOUSE | Dipk2a   | Divergent protein kinase domain 2A                           | 1,61489    | 0,425837    |
| 1349 | SRBS2_MOUSE | Sorbs2   | Sorbin and SH3 domain-containing protein 2                   | 0,0824585  | 0,036673    |
| 1350 | THEM4_MOUSE | Them4    | Acyl-coenzyme A thioesterase THEM4                           | 1,19024    | 0,249303    |
| 1351 | PDP1_MOUSE  | Pdp1     | [Pyruvate dehydrogenase [acetyl-transferring]]-phosphatase 1 | 0,541373   | 0,397614    |
| 1352 | F91A1_MOUSE | Fam91a1  | Protein FAM91A1                                              | 0,338778   | 0,205081    |
| 1353 | VPS51_MOUSE | Vps51    | Vacuolar protein sorting-associated protein 51 homolog       | 0,29244    | 0,105132    |
| 1354 | RGL3_MOUSE  | Rgl3     | Ral guanine nucleotide dissociation stimulator-like 3        | 0,895155   | 0,37708     |
| 1355 | ST1D1_MOUSE | Sult1d1  | Sulfotransferase 1 family member D1                          | 1,34265    | -1,00191    |
| 1356 | PLS1_MOUSE  | Pls1     | Plastin-1                                                    | 0,358064   | -0,501567   |
| 1357 | 5NTC_MOUSE  | Nt5c2    | Cytosolic purine 5'-nucleotidase                             | 0,345935   | 0,119567    |
| 1358 | P3H1_MOUSE  | P3h1     | Prolyl 3-hydroxylase 1                                       | 1,34611    | 0,597153    |
| 1359 | N42L1_MOUSE | N4bp2l1  | NEDD4-binding protein 2-like 1                               | 0,0097293  | 0,0122753   |
| 1360 | AFG1L_MOUSE | Afg1l    | AFG1-like ATPase                                             | 1,24999    | 0,314607    |
| 1361 | PACS2_MOUSE | Pacs2    | Phosphofurin acidic cluster sorting protein 2                | 1,02043    | -0,643868   |
| 1362 | C1TM_MOUSE  | Mthfd1l  | Monofunctional C1-tetrahydrofolate synthase, mitochondrial   | 0,0306198  | 0,0263893   |
| 1363 | ITA1_MOUSE  | Itga1    | Integrin alpha-1                                             | 1,99394    | 0,243674    |
| 1364 | SRBD1_MOUSE | Srbd1    | S1 RNA-binding domain-containing protein 1                   | 0,213879   | 0,0698277   |
| 1365 | SHAN3_MOUSE | Shank3   | SH3 and multiple ankyrin repeat domains protein 3            | 1,42118    | 0,670228    |
| 1366 | MAGIX_MOUSE | Magix    | PDZ domain-containing protein MAGIX                          | 1,07075    | 0,663602    |
| 1367 | ABRAL_MOUSE | Abrac1   | Costars family protein ABRACL                                | 0,389359   | 0,767012    |
| 1368 | ARAP1_MOUSE | Arap1    | Arf-GAP with Rho-GAP domain, ANK repeat PH domain protein 1  | 0,177814   | -0,114691   |
| 1369 | S27A5_MOUSE | Slc27a5  | Bile acyl-CoA synthetase                                     | 0,422434   | -0,177873   |
| 1370 | ODR4_MOUSE  | Odr4     | Protein odr-4 homolog                                        | 2,10116    | 0,575142    |
| 1371 | ECE1_MOUSE  | Ece1     | Endothelin-converting enzyme 1                               | 0,272976   | -0,161016   |
| 1372 | PDS5B_MOUSE | Pds5b    | Sister chromatid cohesion protein PDS5 homolog B             | 0,630761   | 0,21118     |
| 1373 | CDV3_MOUSE  | Cdv3     | Protein CDV3                                                 | 2,06004    | 0,524036    |
| 1374 | DDX17_MOUSE | Ddx17    | Probable ATP-dependent RNA helicase DDX17                    | 1,00993    | 0,266133    |
| 1375 | ARCH_MOUSE  | Zbtb8os  | Protein archease                                             | 1,55567    | 0,529103    |
| 1376 | ANR28_MOUSE | Ankrd28  | Serine/threonine-protein phosphatase 6                       | 0,299674   | 0,202369    |
| 1377 | OPA3_MOUSE  | Opa3     | Optic atrophy 3 protein homolog                              | 0,1406     | 0,112526    |
| 1378 | LRC47_MOUSE | Lrrc47   | Leucine-rich repeat-containing protein 47                    | 1,01514    | 0,476664    |
| 1379 | COQ8B_MOUSE | Coq8b    | Atypical kinase COQ8B, mitochondrial                         | 0,396435   | 0,244963    |
| 1380 | DDX46_MOUSE | Ddx46    | Probable ATP-dependent RNA helicase DDX46                    | 0,042078   | -0,0186821  |
| 1381 | TR150_MOUSE | Thrap3   | Thyroid hormone receptor-associated protein 3                | 0,672364   | 0,35694     |
| 1382 | DPTOR_MOUSE | Deptor   | DEP domain-containing mTOR-interacting protein               | 0,228382   | -0,248802   |
| 1383 | GALNS_MOUSE | Galns    | N-acetylglactosamine-6-sulfatase                             | 0,168461   | 0,138951    |
| 1384 | GLSL_MOUSE  | Gls2     | Glutaminase liver isoform, mitochondrial                     | 0,7781     | 0,511504    |
| 1385 | A16A1_MOUSE | Aldh16a1 | Aldehyde dehydrogenase family 16 member A1                   | 0,337992   | -0,153871   |
| 1386 | JIP4_MOUSE  | Spag9    | C-Jun-amino-terminal kinase-interacting protein 4            | 1,3904     | 0,482749    |
| 1387 | NDUF2_MOUSE | Ndufa2   | NADH dehydrogenase [ubiquinone] 1 alpha                      | 0,139789   | 0,134005    |
| 1388 | PEX1_MOUSE  | Pex1     | Peroxisome biogenesis factor 1                               | 2,73721    | 0,610834    |
| 1389 | TUT7_MOUSE  | Tut7     | Terminal uridylyltransferase 7                               | 0,673335   | 0,197498    |
| 1390 | AF1L2_MOUSE | Afap1l2  | Actin filament-associated protein 1-like 2                   | 0,0153536  | -0,0228073  |
| 1391 | EHMT1_MOUSE | Ehmt1    | Histone-lysine N-methyltransferase EHMT1                     | 1,57997    | 1,24608     |
| 1392 | AAPK1_MOUSE | Prkaa1   | 5'-AMP-activated protein kinase catalytic subunit alpha-1    | 0,443665   | 0,197579    |
| 1393 | NUFP2_MOUSE | Nufip2   | Nuclear fragile X mental retardation-interacting protein 2   | 0,544559   | 0,334954    |
| 1394 | TAOK1_MOUSE | Taok1    | Serine/threonine-protein kinase TAO1                         | 1,3174     | 0,771301    |
| 1395 | ABH15_MOUSE | Abhd15   | Protein ABHD15                                               | 0,0384016  | 0,0379238   |
| 1396 | GLYAL_MOUSE | Gm4952   | Glycine N-acyltransferase-like protein                       | 0,572072   | 0,168914    |
| 1397 | ARHGF_MOUSE | Arhgef15 | Rho guanine nucleotide exchange factor 15                    | 0,141989   | 0,124475    |
| 1398 | CEIP2_MOUSE | Cemip2   | Cell surface hyaluronidase                                   | 0,0116943  | 0,0122463   |
| 1399 | RHG01_MOUSE | Arhgap1  | Rho GTPase-activating protein 1                              | 0,00760392 | -0,00292435 |

|      |             |         |                                                               |           |            |
|------|-------------|---------|---------------------------------------------------------------|-----------|------------|
| 1400 | MTUS1_MOUSE | Mtus1   | Microtubule-associated tumor suppressor 1 homolog             | 0,56121   | 0,449273   |
| 1401 | VPS41_MOUSE | Vps41   | Vacuolar protein sorting-associated protein 41 homolog        | 0,399022  | 0,27571    |
| 1402 | D39U1_MOUSE | Sdr39u1 | Epimerase family protein SDR39U1                              | 0,645323  | 0,48068    |
| 1403 | COBL_MOUSE  | Cobl    | Protein cordon-bleu                                           | 0,605864  | 0,26089    |
| 1404 | TPPC1_MOUSE | Trappc1 | Trafficking protein particle complex subunit 1                | 1,16401   | 2,12512    |
| 1405 | RILP_MOUSE  | Rilp    | Rab-interacting lysosomal protein                             | 0,438542  | 0,326979   |
| 1406 | WDR81_MOUSE | Wdr81   | WD repeat-containing protein 81                               | 0,346095  | 0,268232   |
| 1407 | MRM3_MOUSE  | Mrm3    | rRNA methyltransferase 3, mitochondrial                       | 1,35863   | 1,04292    |
| 1408 | MOCS1_MOUSE | Mocs1   | Molybdenum cofactor biosynthesis protein 1                    | 0,313732  | 0,171193   |
| 1409 | DHR13_MOUSE | Dhrs13  | Dehydrogenase/reductase SDR family member 13                  | 0,398358  | 0,0797974  |
| 1410 | ZZEF1_MOUSE | Zzef1   | Zinc finger ZZ-type and EF-hand domain-containing protein 1   | 0,0195792 | 0,0172768  |
| 1411 | UTP18_MOUSE | Utp18   | U3 small nucleolar RNA-associated protein 18 homolog          | 0,52677   | 0,421203   |
| 1412 | TEFM_MOUSE  | Tefm    | Transcription elongation factor, mitochondrial                | 0,125262  | -0,0607506 |
| 1413 | TENS3_MOUSE | Tns3    | Tensin-3                                                      | 0,211595  | 0,138482   |
| 1414 | LC7L3_MOUSE | Luc7l3  | Luc7-like protein 3                                           | 0,523509  | 0,20957    |
| 1415 | PUR4_MOUSE  | Pfas    | Phosphoribosylformylglycinamide synthase                      | 0,295191  | 0,176665   |
| 1416 | TBC9B_MOUSE | Tbc1d9b | TBC1 domain family member 9B                                  | 1,05292   | -0,505047  |
| 1417 | CLU_MOUSE   | Cluh    | Clustered mitochondria protein homolog                        | 0,462019  | 0,290452   |
| 1418 | ACACA_MOUSE | Acaca   | Acetyl-CoA carboxylase 1                                      | 0,130497  | 0,165536   |
| 1419 | MYH1_MOUSE  | Myh1    | Myosin-1                                                      | 0,189189  | 0,76111    |
| 1420 | SHRM1_MOUSE | Shroom1 | Protein Shroom1                                               | 0,0238618 | -0,0302906 |
| 1421 | MYO1D_MOUSE | Myo1d   | Unconventional myosin-IId                                     | 0,347755  | 0,273713   |
| 1422 | TM199_MOUSE | Tmem199 | Transmembrane protein 199                                     | 1,26563   | 1,40623    |
| 1423 | DJC11_MOUSE | Dnajc11 | DnaJ homolog subfamily C member 11                            | 1,41228   | 0,260859   |
| 1424 | THOC6_MOUSE | Thoc6   | THO complex subunit 6 homolog                                 | 1,07173   | 0,255113   |
| 1425 | REPI1_MOUSE | Repin1  | Replication initiator 1                                       | 1,45667   | 1,12015    |
| 1426 | BLIS3_MOUSE | Bloc1s3 | Biogenesis of lysosome-related organelles complex 1 subunit 3 | 1,10772   | 0,890333   |
| 1427 | HYKK_MOUSE  | Hykk    | Hydroxylysine kinase                                          | 0,185656  | 0,0874092  |
| 1428 | ACBD5_MOUSE | Acbd5   | Acyl-CoA-binding domain-containing protein 5                  | 0,896178  | 0,535962   |
| 1429 | LEO1_MOUSE  | Leo1    | RNA polymerase-associated protein LEO1                        | 0,823733  | 0,387057   |
| 1430 | COPD_MOUSE  | Arcn1   | Coatomer subunit delta                                        | 2,16992   | 0,370177   |
| 1431 | RN123_MOUSE | Rnf123  | E3 ubiquitin-protein ligase RNF123                            | 1,89641   | 2,29346    |
| 1432 | A1CF_MOUSE  | A1cf    | APOBEC1 complementation factor                                | 0,539176  | 0,275822   |
| 1433 | SIN3A_MOUSE | Sin3a   | Paired amphipathic helix protein Sin3a                        | 0,149259  | 0,0855881  |
| 1434 | KIF1B_MOUSE | Kif1b   | Kinesin-like protein KIF1B                                    | 0,95737   | 0,449337   |
| 1435 | ODO1_MOUSE  | Ogdh    | 2-oxoglutarate dehydrogenase, mitochondrial                   | 0,0850637 | 0,0843475  |
| 1436 | SRC8_MOUSE  | Cttn    | Src substrate cortactin                                       | 0,0542541 | 0,0256618  |
| 1437 | MYL6_MOUSE  | Myl6    | Myosin light polypeptide 6                                    | 0,60197   | -0,48313   |
| 1438 | GRB2_MOUSE  | Grb2    | Growth factor receptor-bound protein 2                        | 0,630269  | 0,415618   |
| 1439 | FLOT2_MOUSE | Flot2   | Flotillin-2                                                   | 0,832828  | -0,656495  |
| 1440 | CLPB_MOUSE  | Clpb    | Caseinolytic peptidase B protein homolog                      | 1,04578   | 0,543115   |
| 1441 | HNRPD_MOUSE | Hnmpd   | Heterogeneous nuclear ribonucleoprotein D0                    | 1,13935   | -0,411162  |
| 1442 | PPP5_MOUSE  | Ppp5c   | Serine/threonine-protein phosphatase 5                        | 0,620969  | 0,169256   |
| 1443 | IKKA_MOUSE  | Chuk    | Inhibitor of nuclear factor kappa-B kinase subunit alpha      | 0,383428  | 0,301955   |
| 1444 | PSB6_MOUSE  | Psmb6   | Proteasome subunit beta type-6                                | 0,0551242 | -0,118883  |
| 1445 | SAMH1_MOUSE | Samhd1  | Deoxynucleoside triphosphate triphosphohydrolase SAMHD1       | 1,12362   | 0,451586   |
| 1446 | P4HA1_MOUSE | P4ha1   | Prolyl 4-hydroxylase subunit alpha-1                          | 0,833303  | 0,356029   |
| 1447 | P4HA2_MOUSE | P4ha2   | Prolyl 4-hydroxylase subunit alpha-2                          | 0,173321  | 0,182391   |
| 1448 | CSK21_MOUSE | Csnk2a1 | Casein kinase II subunit alpha                                | 0,200199  | -0,0672451 |
| 1449 | ZNT1_MOUSE  | Slc30a1 | Zinc transporter 1                                            | 0,0223003 | -0,0350685 |
| 1450 | BAG1_MOUSE  | Bag1    | BAG family molecular chaperone regulator 1                    | 0,890323  | 0,527499   |
| 1451 | KHDR1_MOUSE | Khdrbs1 | KH domain-containing, RNA-binding protein 1                   | 0,184289  | 0,248684   |

|      |             |          |                                                                    |           |             |
|------|-------------|----------|--------------------------------------------------------------------|-----------|-------------|
| 1452 | GCDH_MOUSE  | Gcdh     | Glutaryl-CoA dehydrogenase, mitochondrial                          | 0,180336  | 0,175732    |
| 1453 | GRB10_MOUSE | Grb10    | Growth factor receptor-bound protein 10                            | 0,170481  | 0,10004     |
| 1454 | IRGM1_MOUSE | Irgm1    | Immunity-related GTPase family M protein 1                         | 1,02293   | -0,888817   |
| 1455 | STXB3_MOUSE | Stxbp3   | Syntaxin-binding protein 3                                         | 0,788536  | 0,31938     |
| 1456 | CDN2C_MOUSE | Cdkn2c   | Cyclin-dependent kinase 4 inhibitor C                              | 1,19062   | 0,574913    |
| 1457 | AKT2_MOUSE  | Akt2     | RAC-beta serine/threonine-protein kinase                           | 0,220632  | 0,287346    |
| 1458 | SPB6_MOUSE  | Serpinb6 | Serpin B6                                                          | 0,348704  | -0,16496    |
| 1459 | RIPK1_MOUSE | Ripk1    | Receptor-interacting serine/threonine-protein kinase 1             | 0,612213  | 0,213264    |
| 1460 | STIP1_MOUSE | Stip1    | Stress-induced-phosphoprotein 1                                    | 0,70188   | 0,341416    |
| 1461 | CAPR1_MOUSE | Caprin1  | Caprin-1                                                           | 0,430059  | 0,112635    |
| 1462 | PTER_MOUSE  | Pter     | Phosphotriesterase-related protein                                 | 0,454805  | 0,16596     |
| 1463 | IF1A_MOUSE  | Eif1a    | Eukaryotic translation initiation factor 1A                        | 0,937621  | 0,778129    |
| 1464 | EP15R_MOUSE | Eps15l1  | Epidermal growth factor receptor substrate 15-like 1               | 1,06483   | 0,348477    |
| 1465 | VDAC2_MOUSE | Vdac2    | Voltage-dependent anion-selective channel protein 2                | 0,33408   | 0,171128    |
| 1466 | VDAC3_MOUSE | Vdac3    | Voltage-dependent anion-selective channel protein 3                | 1,87489   | -0,714952   |
| 1467 | VDAC1_MOUSE | Vdac1    | Voltage-dependent anion-selective channel protein 1                | 0,0259101 | 0,0165493   |
| 1468 | COQ8A_MOUSE | Coq8a    | Atypical kinase COQ8A, mitochondrial                               | 0,522051  | -0,356282   |
| 1469 | PML_MOUSE   | Pml      | Protein PML                                                        | 0,557488  | -0,463934   |
| 1470 | IMA5_MOUSE  | Kpna1    | Importin subunit alpha-5                                           | 1,3435    | -1,33989    |
| 1471 | PAPS1_MOUSE | Papss1   | Bifunctional 3'-phosphoadenosine 5'-phosphosulfate synthase 1      | 1,43033   | 0,565094    |
| 1472 | RBBP4_MOUSE | Rbbp4    | Histone-binding protein RBBP4                                      | 0,129832  | 0,0858654   |
| 1473 | RBBP7_MOUSE | Rbbp7    | Histone-binding protein RBBP7                                      | 1,44021   | 0,132182    |
| 1474 | NCOR1_MOUSE | Ncor1    | Nuclear receptor corepressor 1                                     | 0,64623   | 0,425904    |
| 1475 | 2A5G_MOUSE  | Ppp2r5c  | Serine/threonine-protein phosphatase 2A                            | 0,223566  | 0,293069    |
| 1476 | LAMA5_MOUSE | Lama5    | Laminin subunit alpha-5                                            | 0,0114692 | -0,0110832  |
| 1477 | LAP2B_MOUSE | Tmpo     | Lamina-associated polypeptide 2, isoforms beta/delta/epsilon/gamma | 0,121241  | 0,197432    |
| 1478 | LAP2A_MOUSE | Tmpo     | Lamina-associated polypeptide 2, isoforms alpha/zeta               | 0,304722  | 0,419582    |
| 1479 | SYHC_MOUSE  | Hars     | Histidine--tRNA ligase, cytoplasmic                                | 0,520139  | 0,240575    |
| 1480 | TSC2_MOUSE  | Tsc2     | Tuberin                                                            | 1,043     | 0,55142     |
| 1481 | EI24_MOUSE  | Ei24     | Etoposide-induced protein 2.4                                      | 0,248133  | -0,232632   |
| 1482 | PPM1G_MOUSE | Ppm1g    | Protein phosphatase 1G                                             | 1,22755   | 0,463165    |
| 1483 | CDC37_MOUSE | Cdc37    | Hsp90 co-chaperone Cdc37                                           | 1,16577   | 0,211465    |
| 1484 | ABCB7_MOUSE | Abcb7    | ATP-binding cassette sub-family B member 7, mitochondrial          | 0,43279   | -0,311999   |
| 1485 | NAB2_MOUSE  | Nab2     | NGFI-A-binding protein 2                                           | 0,252045  | -0,386379   |
| 1486 | CFAI_MOUSE  | Cfi      | Complement factor I                                                | 0,76018   | 0,636826    |
| 1487 | GSTT2_MOUSE | Gstt2    | Glutathione S-transferase theta-2                                  | 0,0786158 | 0,120135    |
| 1488 | PRP4B_MOUSE | Prpf4b   | Serine/threonine-protein kinase PRP4 homolog                       | 0,491631  | 0,287672    |
| 1489 | CERU_MOUSE  | Cp       | Ceruloplasmin                                                      | 0,941695  | 0,358766    |
| 1490 | CTCF_MOUSE  | Ctcf     | Transcriptional repressor CTCF                                     | 0,609334  | 0,221843    |
| 1491 | MARE1_MOUSE | Mapre1   | Microtubule-associated protein RP/EB family member 1               | 0,130657  | -0,0554195  |
| 1492 | PRDX2_MOUSE | Prdx2    | Peroxiredoxin-2                                                    | 0,951169  | 0,262162    |
| 1493 | ARG11_MOUSE | Arg1     | Arginase-1                                                         | 0,699642  | 0,384647    |
| 1494 | TS101_MOUSE | Tsg101   | Tumor susceptibility gene 101 protein                              | 0,0991319 | -0,124144   |
| 1495 | HCFC1_MOUSE | Hcfc1    | Host cell factor 1                                                 | 1,88924   | 0,355487    |
| 1496 | PA1B3_MOUSE | Pafah1b3 | Platelet-activating factor acetylhydrolase 1B subunit gamma        | 0,651926  | 0,368375    |
| 1497 | PA1B2_MOUSE | Pafah1b2 | Platelet-activating factor acetylhydrolase 1B subunit beta         | 0,0413069 | 0,0329327   |
| 1498 | SAP_MOUSE   | Psap     | Prosaposin                                                         | 0,661982  | 0,389727    |
| 1499 | ARHG1_MOUSE | Arhgef1  | Rho guanine nucleotide exchange factor 1                           | 1,77144   | 0,555663    |
| 1500 | EIF2D_MOUSE | Eif2d    | Eukaryotic translation initiation factor 2D                        | 0,624068  | 0,175212    |
| 1501 | MRE11_MOUSE | Mre11    | Double-strand break repair protein MRE11                           | 0,463602  | 0,537407    |
| 1502 | PLSL_MOUSE  | Lcp1     | Plastin-2                                                          | 0,0126942 | -0,00693893 |
| 1503 | SNTA1_MOUSE | Snta1    | Alpha-1-syntrophin                                                 | 0,880151  | 0,485438    |

|      |             |          |                                                                |           |            |
|------|-------------|----------|----------------------------------------------------------------|-----------|------------|
| 1504 | SNTB2_MOUSE | Sntb2    | Beta-2-syntrophin                                              | 0,491761  | 0,252185   |
| 1505 | FNTA_MOUSE  | Fnta     | Protein farnesyltransferase/geranylgeranyltransferase type-1   | 0,51057   | -0,366569  |
| 1506 | A2AP_MOUSE  | Serpinf2 | Alpha-2-antiplasmin                                            | 1,35039   | -1,14208   |
| 1507 | IGBP1_MOUSE | Igbp1    | Immunoglobulin-binding protein 1                               | 0,793712  | 0,185065   |
| 1508 | APOC4_MOUSE | Apoc4    | Apolipoprotein C-IV                                            | 1,11702   | 0,547595   |
| 1509 | ABCD2_MOUSE | Abcd2    | ATP-binding cassette sub-family D member 2                     | 1,30012   | 0,609438   |
| 1510 | LAMB2_MOUSE | Lamb2    | Laminin subunit beta-2                                         | 0,231887  | 0,143796   |
| 1511 | HSP74_MOUSE | Hspa4    | Heat shock 70 kDa protein 4                                    | 0,620149  | 0,196326   |
| 1512 | BAP31_MOUSE | Bcap31   | B-cell receptor-associated protein 31                          | 0,178238  | -0,13297   |
| 1513 | BAD_MOUSE   | Bad      | Bcl2-associated agonist of cell death                          | 0,670842  | 0,529192   |
| 1514 | COX7R_MOUSE | Cox7a2l  | Cytochrome c oxidase subunit 7A-related protein, mitochondrial | 0,440336  | -0,196758  |
| 1515 | PDE3B_MOUSE | Pde3b    | cGMP-inhibited 3',5'-cyclic phosphodiesterase B                | 0,87784   | 0,32581    |
| 1516 | RASH_MOUSE  | Hras     | GTPase HRas                                                    | 0,405025  | 0,121445   |
| 1517 | CMAH_MOUSE  | Cmah     | Cytidine monophosphate-N-acetylneuraminic acid hydroxylase     | 0,115088  | -0,119319  |
| 1518 | HCDH_MOUSE  | Hadh     | Hydroxyacyl-coenzyme A dehydrogenase, mitochondrial            | 0,213323  | 0,211703   |
| 1519 | ZN638_MOUSE | Znf638   | Zinc finger protein 638                                        | 1,50736   | 0,553067   |
| 1520 | CD166_MOUSE | Alcam    | CD166 antigen                                                  | 0,402868  | -0,236855  |
| 1521 | 5NTD_MOUSE  | Nt5e     | 5'-nucleotidase                                                | 1,18962   | 0,553146   |
| 1522 | ECM1_MOUSE  | Ecm1     | Extracellular matrix protein 1                                 | 1,1766    | 0,602824   |
| 1523 | TRI25_MOUSE | Trim25   | E3 ubiquitin/ISG15 ligase TRIM25                               | 0,270316  | -0,089991  |
| 1524 | GSLG1_MOUSE | Glg1     | Golgi apparatus protein 1                                      | 1,40962   | 0,760297   |
| 1525 | RAD21_MOUSE | Rad21    | Double-strand-break repair protein rad21 homolog               | 0,209487  | 0,12859    |
| 1526 | FSCN1_MOUSE | Fscn1    | Fascin                                                         | 0,0317622 | -0,0291595 |
| 1527 | FBN1_MOUSE  | Fbn1     | Fibrillin-1                                                    | 0,0214338 | -0,0441181 |
| 1528 | FCGRN_MOUSE | Fcgrt    | IgG receptor FcRn large subunit p51                            | 0,143301  | 0,0907219  |
| 1529 | FKB10_MOUSE | Fkbp10   | Peptidyl-prolyl cis-trans isomerase FKBP10                     | 0,228989  | 0,129622   |
| 1530 | ADRO_MOUSE  | Fdxr     | NADPH:adrenodoxin oxidoreductase, mitochondrial                | 0,444701  | 0,160235   |
| 1531 | FXR1_MOUSE  | Fxr1     | Fragile X mental retardation syndrome-related protein 1        | 0,377011  | 0,186717   |
| 1532 | GPAT1_MOUSE | Gpam     | Glycerol-3-phosphate acyltransferase 1, mitochondrial          | 0,113131  | 0,118523   |
| 1533 | KTN1_MOUSE  | Ktn1     | Kinectin                                                       | 0,361959  | -0,432707  |
| 1534 | GDI2_MOUSE  | Gdi2     | Rab GDP dissociation inhibitor beta                            | 0,531218  | 0,336394   |
| 1535 | GDIR2_MOUSE | Arhgdib  | Rho GDP-dissociation inhibitor 2                               | 0,662645  | 0,316114   |
| 1536 | HPT_MOUSE   | Hp       | Haptoglobin                                                    | 0,343065  | 0,226225   |
| 1537 | DD19A_MOUSE | Ddx19a   | ATP-dependent RNA helicase DDX19A                              | 0,689468  | 0,358253   |
| 1538 | DDX5_MOUSE  | Ddx5     | Probable ATP-dependent RNA helicase DDX5                       | 0,622046  | 0,273423   |
| 1539 | ATRX_MOUSE  | Atrx     | Transcriptional regulator ATRX                                 | 0,472348  | 0,215774   |
| 1540 | HS105_MOUSE | Hsph1    | Heat shock protein 105 kDa                                     | 1,6167    | 0,766339   |
| 1541 | ITIH1_MOUSE | Itih1    | Inter-alpha-trypsin inhibitor heavy chain H1                   | 1,41348   | 0,421021   |
| 1542 | ITIH2_MOUSE | Itih2    | Inter-alpha-trypsin inhibitor heavy chain H2                   | 0,968087  | 0,778904   |
| 1543 | ITIH3_MOUSE | Itih3    | Inter-alpha-trypsin inhibitor heavy chain H3                   | 0,802269  | 0,393192   |
| 1544 | DNJC1_MOUSE | Dnajc1   | DnaJ homolog subfamily C member 1                              | 0,132761  | -0,0959866 |
| 1545 | IL1AP_MOUSE | Il1rap   | Interleukin-1 receptor accessory protein                       | 0,39742   | 0,449246   |
| 1546 | RT31_MOUSE  | Mrps31   | 28S ribosomal protein S31, mitochondrial                       | 0,309924  | 0,208527   |
| 1547 | ITA6_MOUSE  | Itga6    | Integrin alpha-6                                               | 1,0384    | 0,89238    |
| 1548 | EI2BD_MOUSE | Eif2b4   | Translation initiation factor eIF-2B subunit delta             | 0,259564  | 0,201348   |
| 1549 | SERA_MOUSE  | Phgdh    | D-3-phosphoglycerate dehydrogenase                             | 1,55089   | 1,33879    |
| 1550 | KINH_MOUSE  | Kif5b    | Kinesin-1 heavy chain                                          | 0,62986   | 0,277066   |
| 1551 | LASP1_MOUSE | Lasp1    | LIM and SH3 domain protein 1                                   | 1,11186   | 0,353893   |
| 1552 | PDCD4_MOUSE | Pdcd4    | Programmed cell death protein 4                                | 0,108256  | -0,0591465 |
| 1553 | MRC1_MOUSE  | Mrc1     | Macrophage mannose receptor 1                                  | 0,774827  | -0,441852  |
| 1554 | PZP_MOUSE   | Pzp      | Pregnancy zone protein                                         | 1,07939   | 0,442014   |
| 1555 | MYH10_MOUSE | Myh10    | Myosin-10                                                      | 0,173171  | -0,293366  |

|      |             |          |                                                                   |           |            |
|------|-------------|----------|-------------------------------------------------------------------|-----------|------------|
| 1556 | MCM7_MOUSE  | Mcm7     | DNA replication licensing factor MCM7                             | 0,76565   | 0,606584   |
| 1557 | NPM_MOUSE   | Npm1     | Nucleophosmin                                                     | 1,13067   | 0,606306   |
| 1558 | NNTM_MOUSE  | Nnt      | NAD(P) transhydrogenase, mitochondrial                            | 0,507886  | 0,212551   |
| 1559 | PCBP2_MOUSE | Pcbp2    | Poly(rC)-binding protein 2                                        | 0,12891   | -0,0763092 |
| 1560 | POSTN_MOUSE | Postn    | Periostin                                                         | 0,6697    | 1,40073    |
| 1561 | CTR9_MOUSE  | Ctr9     | RNA polymerase-associated protein CTR9 homolog                    | 0,138999  | 0,0862995  |
| 1562 | CP131_MOUSE | Cep131   | Centrosomal protein of 131 kDa                                    | 0,0907783 | 0,175159   |
| 1563 | PEA15_MOUSE | Pea15    | Astrocytic phosphoprotein PEA-15                                  | 0,143735  | -0,148088  |
| 1564 | PLCG1_MOUSE | Plcg1    | 1-phosphatidylinositol 4,5-bisphosphate phosphodiesterase gamma-1 | 0,577646  | -0,46412   |
| 1565 | PP14B_MOUSE | Ppp1r14b | Protein phosphatase 1 regulatory subunit 14B                      | 0,0915605 | 0,136216   |
| 1566 | PON3_MOUSE  | Pon3     | Serum paraoxonase/lactonase 3                                     | 0,101657  | -0,124463  |
| 1567 | SRSF2_MOUSE | Srsf2    | Serine/arginine-rich splicing factor 2                            | 0,12778   | 0,10838    |
| 1568 | DDX3Y_MOUSE | Ddx3y    | ATP-dependent RNA helicase DDX3Y                                  | 0,333155  | -0,13054   |
| 1569 | DDX3X_MOUSE | Ddx3x    | ATP-dependent RNA helicase DDX3X                                  | 1,71063   | 0,446273   |
| 1570 | SSRD_MOUSE  | Ssr4     | Translocon-associated protein subunit delta                       | 0,568649  | 0,278002   |
| 1571 | DPYL3_MOUSE | Dpysl3   | Dihydropyrimidinase-related protein 3                             | 0,027365  | 0,0265049  |
| 1572 | SNRPA_MOUSE | Snrpa    | U1 small nuclear ribonucleoprotein A                              | 0,22821   | -0,191053  |
| 1573 | RFA2_MOUSE  | Rpa2     | Replication protein A 32 kDa subunit                              | 0,519294  | 0,175042   |
| 1574 | SF3A2_MOUSE | Sf3a2    | Splicing factor 3A subunit 2                                      | 0,67509   | 0,287067   |
| 1575 | TGF11_MOUSE | Tgfb11   | Transforming growth factor beta-1-induced transcript 1 protein    | 0,0696416 | 0,0569305  |
| 1576 | SN_MOUSE    | Siglec1  | Sialoadhesin                                                      | 1,34883   | 0,789771   |
| 1577 | SPTB2_MOUSE | Sptbn1   | Spectrin beta chain, non-erythrocytic 1                           | 0,135105  | 0,137697   |
| 1578 | THRSP_MOUSE | Thrsp    | Thyroid hormone-inducible hepatic protein                         | 0,787715  | -1,9427    |
| 1579 | MED22_MOUSE | Med22    | Mediator of RNA polymerase II transcription subunit 22            | 0,398681  | 0,484307   |
| 1580 | TIF1B_MOUSE | Trim28   | Transcription intermediary factor 1-beta                          | 1,15988   | 0,351453   |
| 1581 | TSN_MOUSE   | Tsn      | Translin                                                          | 0,170491  | -0,207894  |
| 1582 | TFR1_MOUSE  | Tfrc     | Transferrin receptor protein 1                                    | 0,732957  | -0,653273  |
| 1583 | RU17_MOUSE  | Snmp70   | U1 small nuclear ribonucleoprotein 70 kDa                         | 1,12234   | 0,426707   |
| 1584 | SPT6H_MOUSE | Supt6h   | Transcription elongation factor SPT6                              | 0,73061   | 0,422361   |
| 1585 | ZPR1_MOUSE  | Zpr1     | Zinc finger protein ZPR1                                          | 0,443015  | 0,243925   |
| 1586 | PHLA1_MOUSE | Phlda1   | Pleckstrin homology-like domain family A member 1                 | 0,439669  | 0,406136   |
| 1587 | TPD52_MOUSE | Tpd52    | Tumor protein D52                                                 | 0,0790257 | 0,0635826  |
| 1588 | SRBS1_MOUSE | Sorbs1   | Sorbin and SH3 domain-containing protein 1                        | 0,678701  | 0,424861   |
| 1589 | DBNL_MOUSE  | Dbnl     | Drebrin-like protein                                              | 1,26653   | 0,329153   |
| 1590 | SH3G1_MOUSE | Sh3gl1   | Endophilin-A2                                                     | 0,232269  | 0,110841   |
| 1591 | NDUA4_MOUSE | Ndufa4   | Cytochrome c oxidase subunit NDUF4                                | 0,734544  | -0,294509  |
| 1592 | CYTB_MOUSE  | Cstb     | Cystatin-B                                                        | 0,811832  | 0,248965   |
| 1593 | SMAD2_MOUSE | Smad2    | Mothers against decapentaplegic homolog 2                         | 0,3551    | 0,156813   |
| 1594 | FKBP3_MOUSE | Fkbp3    | Peptidyl-prolyl cis-trans isomerase FKBP3                         | 0,0965489 | 0,0616245  |
| 1595 | IF4G2_MOUSE | Eif4g2   | Eukaryotic translation initiation factor 4 gamma 2                | 0,203142  | 0,155867   |
| 1596 | VAT1_MOUSE  | Vat1     | Synaptic vesicle membrane protein VAT-1 homolog                   | 0,544191  | -0,318651  |
| 1597 | MINT_MOUSE  | Spen     | Msx2-interacting protein                                          | 0,160456  | -0,169386  |
| 1598 | ZYX_MOUSE   | Zyx      | Zyxin                                                             | 0,263165  | 0,255012   |
| 1599 | TP4A1_MOUSE | Ptp4a1   | Protein tyrosine phosphatase type IVA 1                           | 0,340316  | -0,295094  |
| 1600 | COMD3_MOUSE | Commd3   | COMM domain-containing protein 3                                  | 0,966103  | 0,422615   |
| 1601 | SBP2_MOUSE  | Selenbp2 | Selenium-binding protein 2                                        | 0,483493  | -0,202768  |
| 1602 | MK03_MOUSE  | Mapk3    | Mitogen-activated protein kinase 3                                | 0,11183   | -0,0682838 |
| 1603 | NUP62_MOUSE | Nup62    | Nuclear pore glycoprotein p62                                     | 0,261607  | -0,446533  |
| 1604 | EST3A_MOUSE | Ces3a    | Carboxylesterase 3A                                               | 1,25379   | 0,883447   |
| 1605 | UD11_MOUSE  | Ugt1a1   | UDP-glucuronosyltransferase 1-1                                   | 0,003443  | 0,00261993 |
| 1606 | CAVN2_MOUSE | Cavin2   | Caveolae-associated protein 2                                     | 1,25362   | 0,303484   |
| 1607 | MP2K2_MOUSE | Map2k2   | Dual specificity mitogen-activated protein kinase kinase 2        | 1,2862    | 0,470441   |

|      |                                  |                      |                                                                   |           |            |
|------|----------------------------------|----------------------|-------------------------------------------------------------------|-----------|------------|
| 1608 | EGLN_MOUSE                       | Eng                  | Endoglin                                                          | 0,459125  | 0,803655   |
| 1609 | CRK_MOUSE                        | Crk                  | Adapter molecule crk                                              | 0,537986  | 0,221581   |
| 1610 | RALY_MOUSE                       | Raly                 | RNA-binding protein Raly                                          | 0,952303  | 0,479921   |
| 1611 | SPRE_MOUSE                       | Spr                  | Sepiapterin reductase                                             | 0,173334  | 0,155256   |
| 1612 | AOFA_MOUSE                       | Maoa                 | Amine oxidase [flavin-containing] A                               | 0,932642  | -0,404788  |
| 1613 | BTF3_MOUSE                       | Btf3                 | Transcription factor BTF3                                         | 0,835087  | 0,335331   |
| 1614 | EST1E_MOUSE                      | Ces1e                | Carboxylesterase 1E                                               | 1,44419   | 1,49167    |
| 1615 | ASPG_MOUSE                       | Aga                  | N(4)-(beta-N-acetylglucosaminy)-L-asparaginase                    | 1,06687   | 0,442719   |
| 1616 | SF01_MOUSE                       | Sf1                  | Splicing factor 1                                                 | 0,5183    | 0,338736   |
| 1617 | CDK6_MOUSE                       | Cdk6                 | Cyclin-dependent kinase 6                                         | 0,0399644 | 0,0171871  |
| 1618 | IFIT1_MOUSE                      | Ifit1                | Interferon-induced protein with tetratricopeptide repeats 1       | 0,701017  | 0,428621   |
| 1619 | STXB2_MOUSE                      | Stxbp2               | Syntaxin-binding protein 2                                        | 0,672276  | 0,43569    |
| 1620 | MYO6_MOUSE                       | Myo6                 | Unconventional myosin-VI                                          | 0,158015  | 0,117093   |
| 1621 | SQSTM_MOUSE                      | Sqstm1               | Sequestosome-1                                                    | 2,21977   | 1,29635    |
| 1622 | IFIT3_MOUSE                      | Ifit3                | Interferon-induced protein with tetratricopeptide repeats 3       | 0,788414  | -0,614974  |
| 1623 | RGN_MOUSE                        | Rgn                  | Regucalcin                                                        | 0,106431  | -0,137727  |
| 1624 | FKBP5_MOUSE                      | Fkbp5                | Peptidyl-prolyl cis-trans isomerase FKBP5                         | 0,825218  | -0,311908  |
| 1625 | CH10_MOUSE                       | Hspe1                | 10 kDa heat shock protein, mitochondrial                          | 0,396749  | 0,217022   |
| 1626 | DHSO_MOUSE                       | Sord                 | Sorbitol dehydrogenase                                            | 0,424199  | 0,178268   |
| 1627 | ATP7B_MOUSE                      | Atp7b                | Copper-transporting ATPase 2                                      | 1,19535   | -0,564849  |
| 1628 | CP2CT_MOUSE                      | Cyp2c29              | Cytochrome P450 2C29                                              | 0,375539  | -0,329755  |
| 1629 | CP3AB_MOUSE                      | Cyp3a11              | Cytochrome P450 3A11                                              | 0,376437  | -0,464805  |
| 1630 | CP4B1_MOUSE                      | Cyp4b1               | Cytochrome P450 4B1                                               | 0,394402  | -0,211481  |
| 1631 | CP3AD_MOUSE                      | Cyp3a13              | Cytochrome P450 3A13                                              | 0,340641  | -0,247824  |
| 1632 | GSTT1_MOUSE                      | Gstt1                | Glutathione S-transferase theta-1                                 | 0,438661  | 0,281251   |
| 1633 | PTPRD_MOUSE                      | Ptprd                | Receptor-type tyrosine-protein phosphatase delta                  | 0,0255722 | 0,0259819  |
| 1634 | TOP2B_MOUSE                      | Top2b                | DNA topoisomerase 2-beta                                          | 0,0906695 | -0,050037  |
| 1635 | TPP2_MOUSE                       | Tpp2                 | Tripeptidyl-peptidase 2                                           | 0,561425  | 0,267134   |
| 1636 | GLPK_MOUSE                       | Gk                   | Glycerol kinase                                                   | 0,674931  | 0,322736   |
| 1637 | GPDM_MOUSE                       | Gpd2                 | Glycerol-3-phosphate dehydrogenase, mitochondrial                 | 1,18908   | 0,496434   |
| 1638 | H2A2A_MOUSE;H2f Hist2h2aa1;Hist2 | Histone H2A type 2-C |                                                                   | 0,362003  | -0,440004  |
| 1639 | NQO1_MOUSE                       | Nqo1                 | NAD(P)H dehydrogenase [quinone] 1                                 | 1,06845   | -0,715784  |
| 1640 | SPEE_MOUSE                       | Srm                  | Spermidine synthase                                               | 0,483267  | 0,386166   |
| 1641 | USF2_MOUSE                       | Usf2                 | Upstream stimulatory factor 2                                     | 0,870685  | 0,557278   |
| 1642 | ZA2G_MOUSE                       | Azgp1                | Zinc-alpha-2-glycoprotein                                         | 0,056003  | 0,0636753  |
| 1643 | VINC_MOUSE                       | Vcl                  | Vinculin                                                          | 0,541097  | 0,341022   |
| 1644 | PUR2_MOUSE                       | Gart                 | Trifunctional purine biosynthetic protein adenosine-3             | 0,44424   | 0,327725   |
| 1645 | RETST_MOUSE                      | Retsat               | All-trans-retinol 13,14-reductase                                 | 1,60626   | 2,18195    |
| 1646 | WAPL_MOUSE                       | Wapl                 | Wings apart-like protein homolog                                  | 0,262533  | -0,0785839 |
| 1647 | PTPM1_MOUSE                      | Ptpmt1               | Phosphatidylglycerophosphatase and protein-tyrosine phosphatase 1 | 0,0343974 | -0,0257702 |
| 1648 | CLH1_MOUSE                       | Cltc                 | Clathrin heavy chain 1                                            | 0,66724   | 0,221452   |
| 1649 | RIPR1_MOUSE                      | Ripor1               | Rho family-interacting cell polarization regulator 1              | 1,11068   | 1,12389    |
| 1650 | GIT1_MOUSE                       | Git1                 | ARF GTPase-activating protein GIT1                                | 0,683241  | 0,381244   |
| 1651 | GALK2_MOUSE                      | Galk2                | N-acetylgalactosamine kinase                                      | 0,483099  | 0,479254   |
| 1652 | SYMC_MOUSE                       | Mars                 | Methionine--tRNA ligase, cytoplasmic                              | 0,709082  | 0,282841   |
| 1653 | SAM9L_MOUSE                      | Samd9l               | Sterile alpha motif domain-containing protein 9-like              | 0,311643  | -0,221233  |
| 1654 | PNKD_MOUSE                       | Pnkd                 | Probable hydrolase PNKD                                           | 2,27036   | 0,670633   |
| 1655 | HECD1_MOUSE                      | Hectd1               | E3 ubiquitin-protein ligase HECTD1                                | 1,49378   | 0,380782   |
| 1656 | HBS1L_MOUSE                      | Hbs1l                | HBS1-like protein                                                 | 0,258882  | 0,12263    |
| 1657 | TMCC1_MOUSE                      | Tmcc1                | Transmembrane and coiled-coil domains protein 1                   | 1,74551   | 0,585851   |
| 1658 | LTN1_MOUSE                       | Ltn1                 | E3 ubiquitin-protein ligase listerin                              | 1,17173   | 0,522173   |
| 1659 | PDS5A_MOUSE                      | Pds5a                | Sister chromatid cohesion protein PDS5 homolog A                  | 0,901802  | 0,207599   |

|      |             |          |                                                              |            |             |
|------|-------------|----------|--------------------------------------------------------------|------------|-------------|
| 1660 | SWP70_MOUSE | Swap70   | Switch-associated protein 70                                 | 0,181639   | 0,119037    |
| 1661 | CDC5L_MOUSE | Cdc5l    | Cell division cycle 5-like protein                           | 0,611701   | 0,473983    |
| 1662 | LAR4B_MOUSE | Larp4b   | La-related protein 4B                                        | 0,781151   | 0,40789     |
| 1663 | F120A_MOUSE | FAM120A  | Constitutive coactivator of PPAR-gamma-like protein 1        | 0,369964   | 0,200587    |
| 1664 | UBP7_MOUSE  | Usp7     | Ubiquitin carboxyl-terminal hydrolase 7                      | 0,367004   | 0,107891    |
| 1665 | CGNL1_MOUSE | Cgnl1    | Cingulin-like protein 1                                      | 0,21697    | -0,0954044  |
| 1666 | RHG21_MOUSE | Arhgap21 | Rho GTPase-activating protein 21                             | 1,1356     | 1,33161     |
| 1667 | NOP58_MOUSE | Nop58    | Nucleolar protein 58                                         | 0,469966   | 0,231935    |
| 1668 | SMCA2_MOUSE | Smarca2  | Probable global transcription activator SNF2L2               | 0,133569   | -0,179516   |
| 1669 | SCMC3_MOUSE | Slc25a23 | Calcium-binding mitochondrial carrier protein SCaMC-3        | 0,264516   | 0,159913    |
| 1670 | NOMO1_MOUSE | Nomo1    | Nodal modulator 1                                            | 0,297962   | 0,248168    |
| 1671 | ZN219_MOUSE | Znf219   | Zinc finger protein 219                                      | 0,993919   | 0,564916    |
| 1672 | TPM4_MOUSE  | Tpm4     | Tropomyosin alpha-4 chain                                    | 0,0295541  | 0,020821    |
| 1673 | CLCB_MOUSE  | Cltb     | Clathrin light chain B                                       | 0,00758774 | -0,00186081 |
| 1674 | EXOC3_MOUSE | Exoc3    | Exocyst complex component 3                                  | 0,0745853  | -0,0774345  |
| 1675 | RRP5_MOUSE  | Pdcd11   | Protein RRP5 homolog                                         | 0,148636   | 0,131934    |
| 1676 | PEPL1_MOUSE | Npepl1   | Probable aminopeptidase NPEPL1                               | 1,89506    | 0,497499    |
| 1677 | DUS23_MOUSE | Dusp23   | Dual specificity protein phosphatase 23                      | 0,939424   | 0,259954    |
| 1678 | SR140_MOUSE | U2surp   | U2 snRNP-associated SURP motif-containing protein            | 0,292251   | -0,218036   |
| 1679 | WDR44_MOUSE | Wdr44    | WD repeat-containing protein 44                              | 0,525665   | 0,196257    |
| 1680 | HELB_MOUSE  | Helb     | DNA helicase B                                               | 0,860935   | 0,740532    |
| 1681 | CPSF6_MOUSE | Cpsf6    | Cleavage and polyadenylation specificity factor subunit 6    | 0,0264339  | -0,0160267  |
| 1682 | FND3B_MOUSE | Fndc3b   | Fibronectin type III domain-containing protein 3B            | 0,880136   | 0,196147    |
| 1683 | DNJC8_MOUSE | Dnajc8   | DnaJ homolog subfamily C member 8                            | 0,424975   | -0,396875   |
| 1684 | S23IP_MOUSE | Sec23ip  | SEC23-interacting protein                                    | 0,0803224  | -0,0728973  |
| 1685 | ZC11A_MOUSE | Zc3h11a  | Zinc finger CCCH domain-containing protein 11A               | 1,15109    | 0,278302    |
| 1686 | IF4G1_MOUSE | Eif4g1   | Eukaryotic translation initiation factor 4 gamma 1           | 0,0661921  | 0,0509289   |
| 1687 | RBM26_MOUSE | Rbm26    | RNA-binding protein 26                                       | 0,125119   | 0,075008    |
| 1688 | ZN740_MOUSE | Znf740   | Zinc finger protein 740                                      | 0,47605    | 0,576265    |
| 1689 | SORCN_MOUSE | Sri      | Sorcin                                                       | 0,24585    | 0,09599     |
| 1690 | XPP1_MOUSE  | Xpnpep1  | Xaa-Pro aminopeptidase 1                                     | 0,213257   | 0,0671516   |
| 1691 | 2ABA_MOUSE  | Ppp2r2a  | Serine/threonine-protein phosphatase 2A                      | 0,326885   | 0,162527    |
| 1692 | P4R3A_MOUSE | Ppp4r3a  | Serine/threonine-protein phosphatase 4 regulatory subunit 3A | 0,937719   | 0,661671    |
| 1693 | ODBB_MOUSE  | Bckdhb   | 2-oxoisovalerate dehydrogenase subunit beta, mitochondrial   | 0,144513   | -0,110746   |
| 1694 | NUD16_MOUSE | Nudt16   | U8 snoRNA-decapping enzyme                                   | 0,220626   | -0,123271   |
| 1695 | SIK3_MOUSE  | Siik3    | Serine/threonine-protein kinase SIK3                         | 0,359499   | 0,142397    |
| 1696 | U520_MOUSE  | Snmp200  | U5 small nuclear ribonucleoprotein 200 kDa helicase          | 0,95922    | 0,22333     |
| 1697 | ABCF1_MOUSE | Abcf1    | ATP-binding cassette sub-family F member 1                   | 0,229177   | -0,193494   |
| 1698 | SMHD1_MOUSE | Smchd1   | Structural maintenance of chromosomes flexible protein 1     | 0,328571   | -0,189314   |
| 1699 | UGGG1_MOUSE | Uggt1    | UDP-glucose:glycoprotein glucosyltransferase 1               | 0,104939   | 0,0969715   |
| 1700 | XPO1_MOUSE  | Xpo1     | Exportin-1                                                   | 0,422248   | -0,267768   |
| 1701 | NEST_MOUSE  | Nes      | Nestin                                                       | 0,877143   | 0,403304    |
| 1702 | TXD15_MOUSE | Txndc15  | Thioredoxin domain-containing protein 15                     | 2,43684    | 0,473545    |
| 1703 | PX11C_MOUSE | Pex11g   | Peroxisomal membrane protein 11C                             | 0,132914   | 0,15708     |
| 1704 | SPCS_MOUSE  | Sepsecs  | O-phosphoserine:tRNA(Sec) selenium transferase               | 0,58454    | 0,450788    |
| 1705 | PCNP_MOUSE  | Pcnp     | PEST proteolytic signal-containing nuclear protein           | 0,71215    | 0,497595    |
| 1706 | SAT2_MOUSE  | Sat2     | Diamine acetyltransferase 2                                  | 0,0986889  | 0,081411    |
| 1707 | TATD1_MOUSE | Tatdn1   | Putative deoxyribonuclease TATDN1                            | 0,231997   | -0,132577   |
| 1708 | SNX6_MOUSE  | Snx6     | Sorting nexin-6                                              | 1,18691    | -0,291977   |
| 1709 | FHOD1_MOUSE | Fhod1    | FH1/FH2 domain-containing protein 1                          | 1,13324    | 0,438796    |
| 1710 | FKB15_MOUSE | Fkbp15   | FK506-binding protein 15                                     | 0,6714     | -0,456097   |
| 1711 | DDX51_MOUSE | Ddx51    | ATP-dependent RNA helicase DDX51                             | 0,2626     | 0,360073    |



|      |             |          |                                                                            |            |             |
|------|-------------|----------|----------------------------------------------------------------------------|------------|-------------|
| 1712 | OXSRI_MOUSE | Oxsr1    | Serine/threonine-protein kinase OSR1                                       | 1,73716    | 0,724573    |
| 1713 | ATLA2_MOUSE | Atl2     | Atlastin-2                                                                 | 0,139242   | 0,0850964   |
| 1714 | DCA13_MOUSE | Dcaf13   | DDB1- and CUL4-associated factor 13                                        | 0,112101   | -0,140247   |
| 1715 | BCR_MOUSE   | Bcr      | Breakpoint cluster region protein                                          | 1,33308    | 1,22658     |
| 1716 | TXLNA_MOUSE | Txlna    | Alpha-taxilin                                                              | 1,62614    | 0,344396    |
| 1717 | GAPD1_MOUSE | Gapvd1   | GTPase-activating protein and VPS9 domain-containing protein 1             | 1,13522    | 0,478305    |
| 1718 | HERC4_MOUSE | Herc4    | Probable E3 ubiquitin-protein ligase HERC4                                 | 0,100819   | 0,0506569   |
| 1719 | PTN23_MOUSE | Ptpn23   | Tyrosine-protein phosphatase non-receptor type 23                          | 1,16442    | 0,461856    |
| 1720 | LPPRC_MOUSE | Lrpprc   | Leucine-rich PPR motif-containing protein, mitochondrial                   | 0,0689269  | -0,0449421  |
| 1721 | GALT2_MOUSE | Galnt2   | Polypeptide N-acetylgalactosaminyltransferase 2                            | 0,509946   | 0,292477    |
| 1722 | 2A5A_MOUSE  | Ppp2r5a  | Serine/threonine-protein phosphatase 2A                                    | 0,841169   | 0,234318    |
| 1723 | SMRC2_MOUSE | Smarcc2  | SWI/SNF complex subunit SMARCC2                                            | 0,0253071  | 0,0175732   |
| 1724 | ECM29_MOUSE | Ecpas    | Proteasome adapter and scaffold protein ECM29                              | 0,393814   | 0,24871     |
| 1725 | DC1L2_MOUSE | Dync1li2 | Cytoplasmic dynein 1 light intermediate chain 2                            | 0,00898447 | -0,00600471 |
| 1726 | SRSF1_MOUSE | Srsf1    | Serine/arginine-rich splicing factor 1                                     | 0,346197   | 0,258918    |
| 1727 | MYLK_MOUSE  | Mylk     | Myosin light chain kinase, smooth muscle                                   | 0,248996   | 0,124164    |
| 1728 | CHD4_MOUSE  | Chd4     | Chromodomain-helicase-DNA-binding protein 4                                | 0,755764   | 0,474402    |
| 1729 | AEDO_MOUSE  | Ado      | 2-aminoethanethiol dioxigenase                                             | 0,772456   | 0,223992    |
| 1730 | SNR40_MOUSE | Snmp40   | U5 small nuclear ribonucleoprotein 40 kDa protein                          | 0,712211   | -0,628814   |
| 1731 | ABHDA_MOUSE | Abhd10   | Mycophenolic acid acyl-glucuronide esterase, mitochondrial                 | 0,564743   | -0,359793   |
| 1732 | CTIF_MOUSE  | Ctif     | CBP80/20-dependent translation initiation factor                           | 0,350112   | 0,466383    |
| 1733 | MARE3_MOUSE | Mapre3   | Microtubule-associated protein RP/EB family member 3                       | 0,301674   | 0,160926    |
| 1734 | NUP98_MOUSE | Nup98    | Nuclear pore complex protein Nup98-Nup96                                   | 0,164478   | 0,0969223   |
| 1735 | NAA50_MOUSE | Naa50    | N-alpha-acetyltransferase 50                                               | 0,351294   | -0,241535   |
| 1736 | DHX29_MOUSE | Dhx29    | ATP-dependent RNA helicase DHX29                                           | 0,19876    | 0,101499    |
| 1737 | EXOC8_MOUSE | Exoc8    | Exocyst complex component 8                                                | 0,601123   | 0,354694    |
| 1738 | GNL3L_MOUSE | Gnl3l    | Guanine nucleotide-binding protein-like 3-like protein                     | 2,12023    | 1,37671     |
| 1739 | BUD31_MOUSE | Bud31    | Protein BUD31 homolog                                                      | 1,17149    | 0,673394    |
| 1740 | JUPI2_MOUSE | Jpt2     | Jupiter microtubule associated homolog 2                                   | 0,0616579  | 0,0835876   |
| 1741 | NAA35_MOUSE | Naa35    | N-alpha-acetyltransferase 35, NatC auxilliary subunit                      | 0,479701   | -0,652466   |
| 1742 | KCC2D_MOUSE | Camk2d   | Calcium/calmodulin-dependent protein kinase type II subunit delta          | 1,55235    | 1,07557     |
| 1743 | NUDC1_MOUSE | Nudcd1   | NudC domain-containing protein 1                                           | 1,00437    | 0,481173    |
| 1744 | AT2B4_MOUSE | Atp2b4   | Plasma membrane calcium-transporting ATPase 4                              | 0,693705   | 0,284989    |
| 1745 | DDX58_MOUSE | Ddx58    | Probable ATP-dependent RNA helicase DDX58                                  | 0,231354   | 0,166999    |
| 1746 | SEC20_MOUSE | Bnip1    | Vesicle transport protein SEC20                                            | 0,734686   | 0,283136    |
| 1747 | PAQR9_MOUSE | Paqr9    | Membrane progesterone receptor epsilon                                     | 1,64772    | 1,65403     |
| 1748 | MYH14_MOUSE | Myh14    | Myosin-14                                                                  | 0,0663547  | -0,0486988  |
| 1749 | RBP10_MOUSE | Ranbp10  | Ran-binding protein 10                                                     | 1,31783    | 1,0146      |
| 1750 | WDFY3_MOUSE | Wdfy3    | WD repeat and FYVE domain-containing protein 3                             | 0,356371   | 0,394968    |
| 1751 | NOSTN_MOUSE | Nostrin  | Nostrin                                                                    | 0,0295622  | -0,0187565  |
| 1752 | UBR2_MOUSE  | Ubr2     | E3 ubiquitin-protein ligase UBR2                                           | 0,104729   | 0,0746738   |
| 1753 | KCD12_MOUSE | Kctd12   | BTB/POZ domain-containing protein KCTD12                                   | 0,877341   | 0,438725    |
| 1754 | GGYF2_MOUSE | Gigyl2   | GRB10-interacting GYF protein 2                                            | 0,93353    | 0,726856    |
| 1755 | MTMR5_MOUSE | Sbf1     | Myotubularin-related protein 5                                             | 0,862112   | 0,461792    |
| 1756 | TEX2_MOUSE  | Tex2     | Testis-expressed protein 2                                                 | 0,83182    | 0,456517    |
| 1757 | UBE2O_MOUSE | Ube2o    | (E3-independent) E2 ubiquitin-conjugating enzyme UBE2O                     | 0,614298   | 0,354352    |
| 1758 | ZC3H4_MOUSE | Zc3h4    | Zinc finger CCCH domain-containing protein 4                               | 0,448487   | 0,31247     |
| 1759 | CNOT1_MOUSE | Cnot1    | CCR4-NOT transcription complex subunit 1                                   | 1,47615    | 0,370184    |
| 1760 | CAND1_MOUSE | Cand1    | Cullin-associated NEDD8-dissociated protein 1                              | 0,208763   | -0,176123   |
| 1761 | LARP1_MOUSE | Larp1    | La-related protein 1                                                       | 2,35382    | 0,471046    |
| 1762 | KDM1A_MOUSE | Kdm1a    | Lysine-specific histone demethylase 1A                                     | 0,212221   | 0,14636     |
| 1763 | VIP2_MOUSE  | Ppip5k2  | Inositol hexakisphosphate and diphosphoinositol-pentakisphosphate kinase : | 0,360269   | -0,268956   |

|      |             |          |                                                                             |            |             |
|------|-------------|----------|-----------------------------------------------------------------------------|------------|-------------|
| 1764 | MLEC_MOUSE  | Mlec     | Malectin                                                                    | 0,924096   | 0,552832    |
| 1765 | ACAP2_MOUSE | Acap2    | Arf-GAP with coiled-coil, ANK repeat and PH domain-containing protein 2     | 0,51217    | 0,207696    |
| 1766 | WDR43_MOUSE | Wdr43    | WD repeat-containing protein 43                                             | 2,04961    | 0,333632    |
| 1767 | LSM8_MOUSE  | Lsm8     | U6 snRNA-associated Sm-like protein LSM8                                    | 0,836297   | 0,33039     |
| 1768 | RS9_MOUSE   | Rps9     | 40S ribosomal protein S9                                                    | 0,0594305  | -0,0233971  |
| 1769 | SYNE2_MOUSE | Syne2    | Nesprin-2                                                                   | 0,487542   | 0,273841    |
| 1770 | SPCS3_MOUSE | Spcs3    | Signal peptidase complex subunit 3                                          | 0,895276   | -0,507188   |
| 1771 | SYNE1_MOUSE | Syne1    | Nesprin-1                                                                   | 0,115485   | -0,321661   |
| 1772 | RS27_MOUSE  | Rps27    | 40S ribosomal protein S27                                                   | 1,62391    | 0,49806     |
| 1773 | RL10_MOUSE  | Rpl10    | 60S ribosomal protein L10                                                   | 0,546216   | 0,465676    |
| 1774 | RL35_MOUSE  | Rpl35    | 60S ribosomal protein L35                                                   | 1,25234    | 0,443335    |
| 1775 | IF2A_MOUSE  | Eif2s1   | Eukaryotic translation initiation factor 2 subunit 1                        | 0,0719045  | 0,05308     |
| 1776 | UB2R2_MOUSE | Ube2r2   | Ubiquitin-conjugating enzyme E2 R2                                          | 1,08234    | 0,306757    |
| 1777 | AKAP9_MOUSE | Akap9    | A-kinase anchor protein 9                                                   | 0,100903   | 0,0513496   |
| 1778 | NADE_MOUSE  | Nadsyn1  | Glutamine-dependent NAD(+) synthetase                                       | 0,341615   | 0,190952    |
| 1779 | TLN2_MOUSE  | Tln2     | Talin-2                                                                     | 0,0770345  | 0,0858463   |
| 1780 | KAT3_MOUSE  | Kyat3    | Kynurenine--oxoglutarate transaminase 3                                     | 0,807168   | -0,279788   |
| 1781 | GIMA8_MOUSE | Gimap8   | GTPase IMAP family member 8                                                 | 1,26548    | 0,974254    |
| 1782 | MINY1_MOUSE | Mindy1   | Ubiquitin carboxyl-terminal hydrolase MINDY-1                               | 0,851694   | 0,588807    |
| 1783 | S22AR_MOUSE | Slc22a27 | Solute carrier family 22 member 27                                          | 0,00382359 | -0,00627899 |
| 1784 | 2AAA_MOUSE  | Ppp2r1a  | Serine/threonine-protein phosphatase 2A 65 kDa regulatory subunit A alpha   | 0,84841    | 0,31913     |
| 1785 | MB12A_MOUSE | Mvb12a   | Multivesicular body subunit 12A                                             | 1,12765    | 0,557366    |
| 1786 | MIC27_MOUSE | Apool    | MICOS complex subunit Mic27                                                 | 0,438434   | -0,278577   |
| 1787 | S39A4_MOUSE | Slc39a4  | Zinc transporter ZIP4                                                       | 1,38974    | 1,05446     |
| 1788 | MSRB2_MOUSE | Msrb2    | Methionine-R-sulfoxide reductase B2, mitochondrial                          | 0,123671   | 0,0601013   |
| 1789 | FBX22_MOUSE | Fbxo22   | F-box only protein 22                                                       | 0,0069264  | 0,00688858  |
| 1790 | 3HAO_MOUSE  | Hao      | 3-hydroxyanthranilate 3,4-dioxygenase                                       | 0,455259   | -0,146377   |
| 1791 | CCD25_MOUSE | Ccdc25   | Coiled-coil domain-containing protein 25                                    | 1,15906    | -0,897297   |
| 1792 | SND1_MOUSE  | Snd1     | Staphylococcal nuclease domain-containing protein 1                         | 0,699249   | 0,382482    |
| 1793 | NP1L4_MOUSE | Nap1l4   | Nucleosome assembly protein 1-like 4                                        | 1,22817    | 0,443001    |
| 1794 | MTCH2_MOUSE | Mtch2    | Mitochondrial carrier homolog 2                                             | 0,0219119  | 0,017276    |
| 1795 | PICAL_MOUSE | Picalm   | Phosphatidylinositol-binding clathrin assembly protein                      | 0,389231   | -0,428638   |
| 1796 | CYFP1_MOUSE | Cytip1   | Cytoplasmic FMR1-interacting protein 1                                      | 0,569291   | 0,118738    |
| 1797 | FCSK_MOUSE  | Fcsk     | L-fucose kinase                                                             | 0,624503   | 0,330167    |
| 1798 | NDUAC_MOUSE | Ndufa12  | NADH dehydrogenase [ubiquinone] 1 alpha subcomplex subunit 12               | 0,214638   | 0,331468    |
| 1799 | HNRPO_MOUSE | Syncrip  | Heterogeneous nuclear ribonucleoprotein Q                                   | 0,284111   | 0,12373     |
| 1800 | TBB2A_MOUSE | Tubb2a   | Tubulin beta-2A chain                                                       | 0,775595   | 0,516737    |
| 1801 | WDR91_MOUSE | Wdr91    | WD repeat-containing protein 91                                             | 0,243775   | 0,237056    |
| 1802 | PCP_MOUSE   | Prpc     | Lysosomal Pro-X carboxypeptidase                                            | 0,159138   | -0,130236   |
| 1803 | ABCG2_MOUSE | Abcg2    | ATP-binding cassette sub-family G member 2                                  | 0,323693   | -0,250526   |
| 1804 | CIAO3_MOUSE | Ciao3    | Cytosolic iron-sulfur assembly component 3                                  | 1,79241    | 0,842078    |
| 1805 | THOC7_MOUSE | Thoc7    | THO complex subunit 7 homolog                                               | 1,06088    | -0,557104   |
| 1806 | HUWE1_MOUSE | Huwe1    | E3 ubiquitin-protein ligase HUWE1                                           | 0,156803   | 0,0963535   |
| 1807 | SMAP2_MOUSE | Smap2    | Stromal membrane-associated protein 2                                       | 0,65766    | 0,38489     |
| 1808 | LC7L2_MOUSE | Luc7l2   | Putative RNA-binding protein Luc7-like 2                                    | 1,85062    | 0,371852    |
| 1809 | RPF1_MOUSE  | Rpf1     | Ribosome production factor 1                                                | 0,942436   | 0,921781    |
| 1810 | SUCHY_MOUSE | Sugt     | Succinate--hydroxymethylglutarate CoA-transferase                           | 0,132619   | -0,109908   |
| 1811 | LDHD_MOUSE  | Ldhd     | Probable D-lactate dehydrogenase, mitochondrial                             | 0,370831   | 0,242169    |
| 1812 | 2AAB_MOUSE  | Ppp2r1b  | Serine/threonine-protein phosphatase 2A 65 kDa regulatory subunit A beta i: | 1,178      | 0,950091    |
| 1813 | DEK_MOUSE   | Dek      | Protein DEK                                                                 | 0,336524   | -0,218715   |
| 1814 | INT3_MOUSE  | Ints3    | Integrator complex subunit 3                                                | 0,111054   | 0,0841228   |
| 1815 | ROBO2_MOUSE | Robo2    | Roundabout homolog 2                                                        | 0,905521   | 0,617259    |

|      |             |          |                                                                   |            |             |
|------|-------------|----------|-------------------------------------------------------------------|------------|-------------|
| 1816 | S7A6O_MOUSE | Slc7a6os | Probable RNA polymerase II nuclear localization protein SLC7A6OS  | 1,56001    | 1,43971     |
| 1817 | MTMRA_MOUSE | Mtmr10   | Myotubularin-related protein 10                                   | 1,53691    | 0,605836    |
| 1818 | ACTN1_MOUSE | Actn1    | Alpha-actinin-1                                                   | 0,00474798 | -0,00189476 |
| 1819 | MBB1A_MOUSE | Mybbp1a  | Myb-binding protein 1A                                            | 0,647249   | 0,25304     |
| 1820 | TPPP_MOUSE  | Tppp     | Tubulin polymerization-promoting protein                          | 2,20658    | 0,744778    |
| 1821 | PKHA6_MOUSE | Plekha6  | Pleckstrin homology domain-containing family A member 6           | 0,662643   | 0,220217    |
| 1822 | ATX2L_MOUSE | Atxn2l   | Ataxin-2-like protein                                             | 0,294086   | 0,123689    |
| 1823 | OTUB1_MOUSE | Otub1    | Ubiquitin thioesterase OTUB1                                      | 0,635923   | -0,377173   |
| 1824 | INT7_MOUSE  | Ints7    | Integrator complex subunit 7                                      | 1,18489    | 0,47408     |
| 1825 | CCD93_MOUSE | Ccdc93   | Coiled-coil domain-containing protein 93                          | 0,335476   | -0,19377    |
| 1826 | PRC2A_MOUSE | Prrc2a   | Protein PRRC2A                                                    | 0,909576   | 0,379085    |
| 1827 | CTDP1_MOUSE | Ctdp1    | RNA polymerase II subunit A C-terminal domain phosphatase         | 0,661944   | 0,495677    |
| 1828 | SCAF4_MOUSE | Scaf4    | SR-related and CTD-associated factor 4                            | 0,283468   | 0,164795    |
| 1829 | PP6R1_MOUSE | Ppp6r1   | Serine/threonine-protein phosphatase 6 regulatory subunit 1       | 0,0102007  | 0,0135807   |
| 1830 | ELP1_MOUSE  | Elp1     | Elongator complex protein 1                                       | 0,160926   | 0,0872398   |
| 1831 | MRCKB_MOUSE | Cdc42bpb | Serine/threonine-protein kinase MRCK beta                         | 0,591013   | 0,267612    |
| 1832 | SAHH2_MOUSE | Ahcyl1   | S-adenosylhomocysteine hydrolase-like protein 1                   | 0,262098   | -0,156942   |
| 1833 | MIB1_MOUSE  | Mib1     | E3 ubiquitin-protein ligase MIB1                                  | 0,671179   | 0,891556    |
| 1834 | GBG5_MOUSE  | Gng5     | Guanine nucleotide-binding protein G(I)/G(S)/G(O) subunit gamma-5 | 0,712406   | 0,207954    |
| 1835 | RPAP1_MOUSE | Rpap1    | RNA polymerase II-associated protein 1                            | 0,932035   | 0,839187    |
| 1836 | ERBIN_MOUSE | Erbin    | Erbin                                                             | 0,537952   | 0,32849     |
| 1837 | MON2_MOUSE  | Mon2     | Protein MON2 homolog                                              | 0,300747   | -0,280301   |
| 1838 | NISCH_MOUSE | Nisch    | Nischarin                                                         | 2,46483    | 0,456982    |
| 1839 | UBR5_MOUSE  | Ubr5     | E3 ubiquitin-protein ligase UBR5                                  | 0,890909   | 1,41485     |
| 1840 | DCAF1_MOUSE | Dcaf1    | DDB1- and CUL4-associated factor 1                                | 0,093812   | 0,113127    |
| 1841 | C170B_MOUSE | Cep170b  | Centrosomal protein of 170 kDa protein B                          | 0,749892   | 0,290427    |
| 1842 | PUM2_MOUSE  | Pum2     | Pumilio homolog 2                                                 | 0,702758   | 0,540134    |
| 1843 | MFN2_MOUSE  | Mfn2     | Mitofusin-2                                                       | 0,362551   | -0,179205   |
| 1844 | SCRIB_MOUSE | Scrib    | Protein scribble homolog                                          | 0,153698   | -0,0840366  |
| 1845 | PUM1_MOUSE  | Pum1     | Pumilio homolog 1                                                 | 1,46034    | 0,355636    |
| 1846 | UBP8_MOUSE  | Usp8     | Ubiquitin carboxyl-terminal hydrolase 8                           | 0,0484182  | 0,0755959   |
| 1847 | NU214_MOUSE | Nup214   | Nuclear pore complex protein Nup214                               | 1,2654     | 0,85339     |
| 1848 | UBE3C_MOUSE | Ube3c    | Ubiquitin-protein ligase E3C                                      | 0,214585   | 0,259184    |
| 1849 | FADS6_MOUSE | Fads6    | Fatty acid desaturase 6                                           | 0,932584   | -1,04593    |
| 1850 | SEPT9_MOUSE | Septin9  | Septin-9                                                          | 0,705262   | 0,236113    |
| 1851 | RB3GP_MOUSE | Rab3gap1 | Rab3 GTPase-activating protein catalytic subunit                  | 0,0372272  | 0,0167908   |
| 1852 | NAA15_MOUSE | Naa15    | N-alpha-acetyltransferase 15, NatA auxiliary subunit              | 0,979818   | 0,545708    |
| 1853 | MOGS_MOUSE  | Mogs     | Mannosyl-oligosaccharide glucosidase                              | 0,384042   | 0,0643856   |
| 1854 | DGKZ_MOUSE  | Dgkz     | Diacylglycerol kinase zeta                                        | 1,90743    | 1,12584     |
| 1855 | ANKZ1_MOUSE | Ankzf1   | Ankyrin repeat and zinc finger domain-containing protein 1        | 0,576001   | 0,461341    |
| 1856 | PGRC2_MOUSE | Pgrmc2   | Membrane-associated progesterone receptor component 2             | 1,04109    | 0,217173    |
| 1857 | RPAB1_MOUSE | Poir2e   | DNA-directed RNA polymerases I, II, and III subunit RPABC1        | 0,0386001  | -0,0291653  |
| 1858 | KCMF1_MOUSE | Kcmf1    | E3 ubiquitin-protein ligase KCMF1                                 | 0,202192   | 0,199498    |
| 1859 | IMPA3_MOUSE | Impad1   | Inositol monophosphatase 3                                        | 0,668441   | 1,21773     |
| 1860 | CAMP3_MOUSE | Camsap3  | Calmodulin-regulated spectrin-associated protein 3                | 2,36243    | 0,676435    |
| 1861 | FA98B_MOUSE | Fam98b   | Protein FAM98B                                                    | 0,652283   | 0,569437    |
| 1862 | TRIM5_MOUSE | Trim56   | E3 ubiquitin-protein ligase TRIM56                                | 1,22402    | 0,472551    |
| 1863 | SRA1_MOUSE  | Sra1     | Steroid receptor RNA activator 1                                  | 1,8165     | 0,770991    |
| 1864 | TDRKH_MOUSE | Tdrkh    | Tudor and KH domain-containing protein                            | 0,847089   | 0,731341    |
| 1865 | EPN1_MOUSE  | Epn1     | Epsin-1                                                           | 0,0358645  | -0,0372055  |
| 1866 | PP1RA_MOUSE | Ppp1r10  | Serine/threonine-protein phosphatase 1 regulatory subunit 10      | 0,363146   | 0,139738    |
| 1867 | GSTM7_MOUSE | Gstm7    | Glutathione S-transferase Mu 7                                    | 1,61644    | -0,628403   |

|      |             |          |                                                                                |           |            |
|------|-------------|----------|--------------------------------------------------------------------------------|-----------|------------|
| 1868 | THNS2_MOUSE | Thnsl2   | Threonine synthase-like 2                                                      | 0,624626  | 0,34105    |
| 1869 | SPN1_MOUSE  | Snupn    | Snurportin-1                                                                   | 0,106063  | 0,0458458  |
| 1870 | FACE1_MOUSE | Zmpste24 | CAAX prenyl protease 1 homolog                                                 | 0,611472  | -0,412611  |
| 1871 | AGFG2_MOUSE | Agfg2    | Arf-GAP domain and FG repeat-containing protein 2                              | 0,0848762 | 0,0688534  |
| 1872 | LYRIC_MOUSE | Mtdh     | Protein LYRIC                                                                  | 1,4451    | 0,256958   |
| 1873 | VAC14_MOUSE | Vac14    | Protein VAC14 homolog                                                          | 0,236774  | 0,331014   |
| 1874 | CA174_MOUSE |          | UPF0688 protein C1orf174 homolog                                               | 1,04211   | 0,35594    |
| 1875 | DDRKG_MOUSE | Ddrgk1   | DDRKG domain-containing protein 1                                              | 2,03595   | 1,86493    |
| 1876 | COEA1_MOUSE | Col14a1  | Collagen alpha-1(XIV) chain                                                    | 0,609592  | -0,430096  |
| 1877 | UBP2L_MOUSE | Ubp2l    | Ubiquitin-associated protein 2-like                                            | 0,374296  | 0,129609   |
| 1878 | PELO_MOUSE  | Pelo     | Protein pelota homolog                                                         | 0,329585  | 0,196249   |
| 1879 | C2C2L_MOUSE | C2cd2l   | Phospholipid transfer protein C2CD2L                                           | 1,26599   | 0,456392   |
| 1880 | RT07_MOUSE  | Mrps7    | 28S ribosomal protein S7, mitochondrial                                        | 0,261113  | 0,170663   |
| 1881 | FLNB_MOUSE  | Flnb     | Filamin-B                                                                      | 1,1702    | 0,378184   |
| 1882 | RRAGA_MOUSE | Rraga    | Ras-related GTP-binding protein A                                              | 1,5612    | 0,241077   |
| 1883 | IF4G3_MOUSE | Eif4g3   | Eukaryotic translation initiation factor 4 gamma 3                             | 0,533789  | 0,205493   |
| 1884 | ACD11_MOUSE | Acad11   | Acyl-CoA dehydrogenase family member 11                                        | 1,99903   | 0,91016    |
| 1885 | BDH_MOUSE   | Bdh1     | D-beta-hydroxybutyrate dehydrogenase, mitochondrial                            | 1,70719   | 0,627647   |
| 1886 | GLRX5_MOUSE | Glr5     | Glutaredoxin-related protein 5, mitochondrial                                  | 0,370885  | 0,162933   |
| 1887 | BSDC1_MOUSE | Bsdcl    | BSD domain-containing protein 1                                                | 1,95104   | 1,44483    |
| 1888 | RNZ2_MOUSE  | Elac2    | Zinc phosphodiesterase ELAC protein 2                                          | 0,127928  | 0,0550945  |
| 1889 | FA12_MOUSE  | F12      | Coagulation factor XII                                                         | 0,0190996 | 0,0377106  |
| 1890 | SUV3_MOUSE  | Supv3l1  | ATP-dependent RNA helicase SUPV3L1, mitochondrial                              | 0,479463  | -0,306247  |
| 1891 | DAPK1_MOUSE | Dapk1    | Death-associated protein kinase 1                                              | 1,14587   | 0,467315   |
| 1892 | ZN598_MOUSE | Znf598   | E3 ubiquitin-protein ligase ZNF598                                             | 0,0937083 | -0,208786  |
| 1893 | SAFB2_MOUSE | Safb2    | Scaffold attachment factor B2                                                  | 1,01321   | -0,479982  |
| 1894 | NIPA_MOUSE  | Zc3hc1   | Nuclear-interacting partner of ALK                                             | 0,735206  | 0,609483   |
| 1895 | TENA_MOUSE  | Tnc      | Tenascin                                                                       | 0,0578076 | -0,0783772 |
| 1896 | RT10_MOUSE  | Mrps10   | 28S ribosomal protein S10, mitochondrial                                       | 0,42807   | -0,212319  |
| 1897 | ABITM_MOUSE | Abitram  | Protein Abitram                                                                | 1,01899   | 0,739747   |
| 1898 | RT26_MOUSE  | Mrps26   | 28S ribosomal protein S26, mitochondrial                                       | 0,0443329 | -0,0218884 |
| 1899 | DDX42_MOUSE | Ddx42    | ATP-dependent RNA helicase DDX42                                               | 0,600391  | 0,239278   |
| 1900 | ANFY1_MOUSE | Ankfy1   | Rabankyrin-5                                                                   | 0,227528  | -0,0991077 |
| 1901 | ZFYV1_MOUSE | Zfyve1   | Zinc finger FYVE domain-containing protein 1                                   | 0,201035  | 0,164263   |
| 1902 | CCD50_MOUSE | Ccdc50   | Coiled-coil domain-containing protein 50                                       | 1,41239   | 0,972843   |
| 1903 | DLG1_MOUSE  | Dlg1     | Disks large homolog 1                                                          | 0,493371  | 0,119051   |
| 1904 | MFN1_MOUSE  | Mfn1     | Mitofusin-1                                                                    | 0,0630869 | -0,0267216 |
| 1905 | CPEB2_MOUSE | Cpeb2    | Cytoplasmic polyadenylation element-binding protein 2                          | 0,0312988 | 0,0575455  |
| 1906 | PDK1_MOUSE  | Pdk1     | [Pyruvate dehydrogenase (acetyl-transferring)] kinase isozyme 1, mitochondrion | 0,774069  | -0,676941  |
| 1907 | WDR82_MOUSE | Wdr82    | WD repeat-containing protein 82                                                | 0,580764  | 0,457205   |
| 1908 | GALD1_MOUSE | Gatd1    | Glutamine amidotransferase-like class 1 domain-containing protein 1            | 0,27235   | 0,110698   |
| 1909 | GNS_MOUSE   | Gns      | N-acetylglucosamine-6-sulfatase                                                | 0,105161  | 0,129334   |
| 1910 | EFTU_MOUSE  | Tufm     | Elongation factor Tu, mitochondrial                                            | 0,481101  | 0,274041   |
| 1911 | ZFAN1_MOUSE | Zfand1   | AN1-type zinc finger protein 1                                                 | 0,482618  | 0,556404   |
| 1912 | CPPED_MOUSE | Cpped1   | Serine/threonine-protein phosphatase CPPED1                                    | 0,475985  | -0,501226  |
| 1913 | RN214_MOUSE | Rnf214   | RING finger protein 214                                                        | 1,03975   | 1,17102    |
| 1914 | LPP_MOUSE   | Lpp      | Lipoma-preferred partner homolog                                               | 1,25597   | 0,311158   |
| 1915 | PEF1_MOUSE  | Pef1     | Peflin                                                                         | 0,111275  | -0,0965874 |
| 1916 | TNPO1_MOUSE | Tnpo1    | Transportin-1                                                                  | 0,25783   | -0,170502  |
| 1917 | ACTBL_MOUSE | Actbl2   | Beta-actin-like protein 2                                                      | 0,473468  | -0,220579  |
| 1918 | ERLN2_MOUSE | Erlin2   | Erlin-2                                                                        | 0,82935   | 0,550473   |
| 1919 | ROA3_MOUSE  | Hnrnpa3  | Heterogeneous nuclear ribonucleoprotein A3                                     | 0,306988  | -0,246338  |

|      |             |          |                                                               |            |            |
|------|-------------|----------|---------------------------------------------------------------|------------|------------|
| 1920 | PLD4_MOUSE  | Plid4    | Phospholipase D4                                              | 0,199607   | -0,199932  |
| 1921 | PSD11_MOUSE | Psmd11   | 26S proteasome non-ATPase regulatory subunit 11               | 1,04884    | 0,461818   |
| 1922 | MIRO1_MOUSE | Rhot1    | Mitochondrial Rho GTPase 1                                    | 0,484468   | 0,37942    |
| 1923 | EFR3A_MOUSE | Efr3a    | Protein EFR3 homolog A                                        | 0,322565   | 0,130927   |
| 1924 | PDIP3_MOUSE | Poldip3  | Polymerase delta-interacting protein 3                        | 0,530555   | 0,453499   |
| 1925 | COMD7_MOUSE | Commd7   | COMM domain-containing protein 7                              | 0,41197    | -0,38155   |
| 1926 | ACSM5_MOUSE | Acsm5    | Acyl-coenzyme A synthetase ACSM5, mitochondrial               | 0,0894483  | -0,0295593 |
| 1927 | OXA1L_MOUSE | Oxa1l    | Mitochondrial inner membrane protein OXA1L                    | 0,00182565 | 0,00296364 |
| 1928 | ENOPH_MOUSE | Enoph1   | Enolase-phosphatase E1                                        | 0,308222   | 0,25746    |
| 1929 | HTSF1_MOUSE | Htatsf1  | HIV Tat-specific factor 1 homolog                             | 2,25386    | 1,27979    |
| 1930 | PTGR3_MOUSE | Zadh2    | Prostaglandin reductase-3                                     | 0,966029   | 0,388615   |
| 1931 | IF4B_MOUSE  | Eif4b    | Eukaryotic translation initiation factor 4B                   | 0,902158   | 0,547239   |
| 1932 | PAN2_MOUSE  | Pan2     | PAN2-PAN3 deadenylation complex catalytic subunit Pan2        | 0,239118   | 0,402027   |
| 1933 | SAM50_MOUSE | Samm50   | Sorting and assembly machinery component 50 homolog           | 0,393662   | -0,186278  |
| 1934 | SYAC_MOUSE  | Aars     | Alanine--tRNA ligase, cytoplasmic                             | 0,570271   | 0,226088   |
| 1935 | LRC8D_MOUSE | Lrrc8d   | Volume-regulated anion channel subunit LRRC8D                 | 0,853405   | 0,396204   |
| 1936 | UBCP1_MOUSE | Ublcp1   | Ubiquitin-like domain-containing CTD phosphatase 1            | 0,524418   | 0,25769    |
| 1937 | E41L5_MOUSE | Epb41l5  | Band 4.1-like protein 5                                       | 0,833351   | 0,457466   |
| 1938 | BOLA2_MOUSE | Bola2    | BolA-like protein 2                                           | 1,52523    | 0,524736   |
| 1939 | CEPT1_MOUSE | Cept1    | Choline/ethanolaminephosphotransferase 1                      | 0,01708    | -0,0157558 |
| 1940 | ALAT2_MOUSE | Gpt2     | Alanine aminotransferase 2                                    | 0,0565863  | -0,0609837 |
| 1941 | SYNM_MOUSE  | Nars2    | Probable asparagine--tRNA ligase, mitochondrial               | 0,12779    | 0,110661   |
| 1942 | MID51_MOUSE | Mief1    | Mitochondrial dynamics protein MID51                          | 0,293883   | 0,285461   |
| 1943 | FTO_MOUSE   | Fto      | Alpha-ketoglutarate-dependent dioxygenase FTO                 | 0,7133     | 0,978613   |
| 1944 | TIM29_MOUSE | Timm29   | Mitochondrial import inner membrane translocase subunit Tim29 | 1,4487     | 0,6491     |
| 1945 | CDC23_MOUSE | Cdc23    | Cell division cycle protein 23 homolog                        | 0,00915276 | -0,0104225 |
| 1946 | AL8A1_MOUSE | Aldh8a1  | 2-aminomuconic semialdehyde dehydrogenase                     | 0,894251   | 0,134177   |
| 1947 | PCKGM_MOUSE | Pck2     | Phosphoenolpyruvate carboxykinase [GTP], mitochondrial        | 0,632575   | 0,310028   |
| 1948 | TM9S4_MOUSE | Tm9sf4   | Transmembrane 9 superfamily member 4                          | 0,69099    | -0,32507   |
| 1949 | CO8B_MOUSE  | C8b      | Complement component C8 beta chain                            | 0,151273   | -0,301268  |
| 1950 | WASF2_MOUSE | Wasf2    | Wiskott-Aldrich syndrome protein family member 2              | 0,616834   | 0,237748   |
| 1951 | TIPRL_MOUSE | Tiprl    | TIP41-like protein                                            | 0,158673   | 0,0692131  |
| 1952 | CMC1_MOUSE  | Slc25a12 | Calcium-binding mitochondrial carrier protein Aralar1         | 0,840535   | -0,479828  |
| 1953 | GOPC_MOUSE  | Gopc     | Golgi-associated PDZ and coiled-coil motif-containing protein | 0,647002   | -0,287512  |
| 1954 | EHD2_MOUSE  | Ehd2     | EH domain-containing protein 2                                | 0,0760022  | -0,104786  |
| 1955 | SPS1_MOUSE  | Sephs1   | Selenide, water dikinase 1                                    | 0,666196   | -0,260571  |
| 1956 | GLUCM_MOUSE | Dglucy   | D-glutamate cyclase, mitochondrial                            | 0,0481421  | -0,0164169 |
| 1957 | ECHM_MOUSE  | Echs1    | Enoyl-CoA hydratase, mitochondrial                            | 0,028439   | -0,0131943 |
| 1958 | RCN3_MOUSE  | Rcn3     | Reticulocalbin-3                                              | 0,779659   | -0,36624   |
| 1959 | DTD2_MOUSE  | Dtd2     | D-aminoacyl-tRNA deacylase 2                                  | 0,0331648  | -0,0319927 |
| 1960 | LYVE1_MOUSE | Lyve1    | Lymphatic vessel endothelial hyaluronic acid receptor 1       | 0,15616    | 0,0801857  |
| 1961 | DCAKD_MOUSE | Dcakd    | Dephospho-CoA kinase domain-containing protein                | 0,433866   | 0,300973   |
| 1962 | FUT11_MOUSE | Fut11    | Alpha-(1,3)-fucosyltransferase 11                             | 0,199293   | 0,145209   |
| 1963 | PTBP3_MOUSE | Ptbp3    | Polypyrimidine tract-binding protein 3                        | 0,0711624  | -0,0347477 |
| 1964 | NRDC_MOUSE  | Nrdc     | Nardilysin                                                    | 0,635062   | -0,257489  |
| 1965 | CZIB_MOUSE  | Czib     | CXXC motif containing zinc binding protein                    | 0,40163    | -0,528772  |
| 1966 | CGBP1_MOUSE | Cggbp1   | CGG triplet repeat-binding protein 1                          | 0,635179   | -1,11218   |
| 1967 | ELMO2_MOUSE | Elmo2    | Engulfment and cell motility protein 2                        | 0,446209   | -0,409751  |
| 1968 | PSMF1_MOUSE | Psmf1    | Proteasome inhibitor PI31 subunit                             | 0,188335   | 0,0960537  |
| 1969 | PPM1L_MOUSE | Ppm1l    | Protein phosphatase 1L                                        | 1,23888    | 0,433543   |
| 1970 | TXLNG_MOUSE | Txlng    | Gamma-taxilin                                                 | 0,444963   | -0,441807  |
| 1971 | GANAB_MOUSE | Ganab    | Neutral alpha-glucosidase AB                                  | 1,01587    | 0,449488   |

|      |             |          |                                                                             |            |            |
|------|-------------|----------|-----------------------------------------------------------------------------|------------|------------|
| 1972 | RBM22_MOUSE | Rbm22    | Pre-mRNA-splicing factor RBM22                                              | 0,284546   | 0,148745   |
| 1973 | CARF_MOUSE  | Cdkn2aip | CDKN2A-interacting protein                                                  | 0,499105   | 0,214613   |
| 1974 | TGO1_MOUSE  | Mia3     | Transport and Golgi organization protein 1 homolog                          | 0,268035   | 0,152037   |
| 1975 | SP130_MOUSE | Sap130   | Histone deacetylase complex subunit SAP130                                  | 0,90511    | 0,410973   |
| 1976 | SYIM_MOUSE  | Iars2    | Isoleucine--tRNA ligase, mitochondrial                                      | 0,106455   | 0,0493736  |
| 1977 | RUFY1_MOUSE | Rufy1    | RUN and FYVE domain-containing protein 1                                    | 0,716688   | 0,346671   |
| 1978 | HOOK1_MOUSE | Hook1    | Protein Hook homolog 1                                                      | 1,05204    | 0,398801   |
| 1979 | SYDM_MOUSE  | Dars2    | Aspartate--tRNA ligase, mitochondrial                                       | 0,794745   | 0,36309    |
| 1980 | CSTF2_MOUSE | Cstf2    | Cleavage stimulation factor subunit 2                                       | 0,748225   | 0,469099   |
| 1981 | PRUN1_MOUSE | Prune1   | Exopolyphosphatase PRUNE1                                                   | 0,682167   | 0,284843   |
| 1982 | ZC3HE_MOUSE | Zc3h14   | Zinc finger CCCH domain-containing protein 14                               | 0,350222   | 0,191445   |
| 1983 | NAGPA_MOUSE | Nagpa    | N-acetylglucosamine-1-phosphodiester alpha-N-acetylglucosaminidase          | 1,37287    | 0,484982   |
| 1984 | CHDH_MOUSE  | Chdh     | Choline dehydrogenase, mitochondrial                                        | 0,00598927 | 0,00287933 |
| 1985 | NUP93_MOUSE | Nup93    | Nuclear pore complex protein Nup93                                          | 0,919757   | 0,180553   |
| 1986 | ZN771_MOUSE | Znf771   | Zinc finger protein 771                                                     | 0,0254334  | -0,0312817 |
| 1987 | CHM2B_MOUSE | Chmp2b   | Charged multivesicular body protein 2b                                      | 0,368403   | 0,216391   |
| 1988 | SUN2_MOUSE  | Sun2     | SUN domain-containing protein 2                                             | 0,096177   | -0,0934654 |
| 1989 | SGTA_MOUSE  | Sgta     | Small glutamine-rich tetratricopeptide repeat-containing protein alpha      | 0,951927   | 0,635886   |
| 1990 | RF1ML_MOUSE | Mtrf11   | Peptide chain release factor 1-like, mitochondrial                          | 0,650623   | -0,666568  |
| 1991 | EIF2A_MOUSE | Eif2a    | Eukaryotic translation initiation factor 2A                                 | 0,0244813  | 0,0212086  |
| 1992 | PSMD5_MOUSE | Psmd5    | 26S proteasome non-ATPase regulatory subunit 5                              | 0,331785   | 0,162709   |
| 1993 | RT35_MOUSE  | Mrps35   | 28S ribosomal protein S35, mitochondrial                                    | 0,0707552  | -0,0696228 |
| 1994 | TMM11_MOUSE | Tmem11   | Transmembrane protein 11, mitochondrial                                     | 0,542064   | -0,812857  |
| 1995 | EST2E_MOUSE | Ces2e    | Pyrethroid hydrolase Ces2e                                                  | 0,0338409  | -0,0156818 |
| 1996 | KC1A_MOUSE  | Csnk1a1  | Casein kinase I isoform alpha                                               | 0,696259   | 0,193187   |
| 1997 | AHSA1_MOUSE | Ahsa1    | Activator of 90 kDa heat shock protein ATPase homolog 1                     | 0,634598   | 0,318943   |
| 1998 | RCC2_MOUSE  | Rcc2     | Protein RCC2                                                                | 0,199299   | 0,099678   |
| 1999 | RT27_MOUSE  | Mrps27   | 28S ribosomal protein S27, mitochondrial                                    | 0,674512   | 0,220486   |
| 2000 | IPO5_MOUSE  | Ipo5     | Importin-5                                                                  | 0,572318   | -0,60918   |
| 2001 | PTK7_MOUSE  | Plk7     | Inactive tyrosine-protein kinase 7                                          | 0,782173   | 1,13159    |
| 2002 | TNR6B_MOUSE | Tnrc6b   | Trinucleotide repeat-containing gene 6B protein                             | 0,190046   | 0,322943   |
| 2003 | PUM3_MOUSE  | Pum3     | Pumilio homolog 3                                                           | 0,674892   | 0,317653   |
| 2004 | THOC5_MOUSE | Thoc5    | THO complex subunit 5 homolog                                               | 0,914433   | 1,23292    |
| 2005 | BAIP2_MOUSE | Baiap2   | Brain-specific angiogenesis inhibitor 1-associated protein 2                | 0,285677   | 0,192719   |
| 2006 | ODPX_MOUSE  | Pdpx     | Pyruvate dehydrogenase protein X component, mitochondrial                   | 0,695408   | 0,366899   |
| 2007 | EEA1_MOUSE  | Eea1     | Early endosome antigen 1                                                    | 0,0603286  | -0,090588  |
| 2008 | SRSF7_MOUSE | Srsf7    | Serine/arginine-rich splicing factor 7                                      | 1,06927    | 0,299463   |
| 2009 | ERG7_MOUSE  | Lss      | Lanosterol synthase                                                         | 0,260936   | -0,224196  |
| 2010 | SMOC1_MOUSE | Smoc1    | SPARC-related modular calcium-binding protein 1                             | 0,159939   | 0,267732   |
| 2011 | SYTC2_MOUSE | Tarsl2   | Threonine--tRNA ligase 2, cytoplasmic                                       | 0,269465   | 0,239146   |
| 2012 | TM214_MOUSE | Tmem214  | Transmembrane protein 214                                                   | 0,792637   | 0,202372   |
| 2013 | HSP13_MOUSE | Hspa13   | Heat shock 70 kDa protein 13                                                | 0,147194   | 0,137937   |
| 2014 | SRP68_MOUSE | Srp68    | Signal recognition particle subunit SRP68                                   | 0,93639    | 0,348974   |
| 2015 | IF4E2_MOUSE | Eif4e2   | Eukaryotic translation initiation factor 4E type 2                          | 0,850857   | 0,429987   |
| 2016 | ODP2_MOUSE  | Dlat     | Dihydropolypyllysine-residue acetyltransferase component of pyruvate dehydr | 0,178468   | 0,129704   |
| 2017 | RBGPR_MOUSE | Rab3gap2 | Rab3 GTPase-activating protein non-catalytic subunit                        | 0,31152    | 0,235061   |
| 2018 | SYLC_MOUSE  | Lars     | Leucine--tRNA ligase, cytoplasmic                                           | 0,988461   | 0,419984   |
| 2019 | CKAP4_MOUSE | Ckap4    | Cytoskeleton-associated protein 4                                           | 0,0375689  | 0,017099   |
| 2020 | SYQ_MOUSE   | Qars     | Glutamine--tRNA ligase                                                      | 0,854435   | 0,403695   |
| 2021 | GCP60_MOUSE | Acbd3    | Golgi resident protein GCP60                                                | 0,206676   | -0,177502  |
| 2022 | ECHA_MOUSE  | Hadha    | Trifunctional enzyme subunit alpha, mitochondrial                           | 0,710322   | 0,295385   |
| 2023 | SEN34_MOUSE | Tsen34   | tRNA-splicing endonuclease subunit Sen34                                    | 0,792793   | 0,471888   |

|      |                               |         |                                                           |            |             |
|------|-------------------------------|---------|-----------------------------------------------------------|------------|-------------|
| 2024 | QSOX1_MOUSE                   | Qsox1   | Sulfhydryl oxidase 1                                      | 0,172286   | 0,142533    |
| 2025 | ARMC6_MOUSE                   | Armc6   | Armado repeat-containing protein 6                        | 1,29303    | 0,601952    |
| 2026 | SFR1_MOUSE                    | Sfr1    | Swi5-dependent recombination DNA repair protein 1 homolog | 0,0314563  | 0,0355473   |
| 2027 | PPA6_MOUSE                    | Acp6    | Lysophosphatidic acid phosphatase type 6                  | 0,0302135  | -0,0292572  |
| 2028 | SYNC_MOUSE                    | Nars    | Asparagine--tRNA ligase, cytoplasmic                      | 0,0279276  | 0,0167908   |
| 2029 | MAP11_MOUSE                   | Metap1  | Methionine aminopeptidase 1                               | 0,00490413 | -0,00285187 |
| 2030 | PGGHG_MOUSE                   | Pgghg   | Protein-glucosylgalactosylhydroxylysine glucosidase       | 0,163058   | 0,145412    |
| 2031 | RL24_MOUSE                    | Rpl24   | 60S ribosomal protein L24                                 | 0,868871   | 0,393829    |
| 2032 | RFOX1_MOUSE;Rf1;Rbfox1;Rbfox2 |         | RNA binding protein fox-1 homolog 2                       | 0,0947072  | -0,140358   |
| 2033 | RCN2_MOUSE                    | Rcn2    | Reticulocalbin-2                                          | 0,109456   | 0,181149    |
| 2034 | TM177_MOUSE                   | Tmem177 | Transmembrane protein 177                                 | 0,0867179  | -0,0982277  |
| 2035 | DAAM1_MOUSE                   | Daam1   | Disheveled-associated activator of morphogenesis 1        | 1,20026    | 0,455787    |
| 2036 | PPR18_MOUSE                   | Ppp1r18 | Phostensin                                                | 2,17497    | 0,877172    |
| 2037 | CNPY4_MOUSE                   | Cnpy4   | Protein canopy homolog 4                                  | 0,851514   | 0,428481    |
| 2038 | HEAT3_MOUSE                   | Heatr3  | HEAT repeat-containing protein 3                          | 0,427831   | 0,255053    |
| 2039 | SCFD1_MOUSE                   | Scfd1   | Sec1 family domain-containing protein 1                   | 1,50357    | 0,546238    |
| 2040 | TMTC3_MOUSE                   | Tmtc3   | Protein O-mannosyl-transferase TMTC3                      | 0,95368    | 0,503251    |
| 2041 | AAPK2_MOUSE                   | Prkaa2  | 5'-AMP-activated protein kinase catalytic subunit alpha-2 | 0,181342   | 0,109032    |
| 2042 | C2D1B_MOUSE                   | Cc2d1b  | Coiled-coil and C2 domain-containing protein 1B           | 1,25229    | 0,787185    |
| 2043 | CLAP2_MOUSE                   | Clasp2  | CLIP-associating protein 2                                | 0,437897   | -0,207156   |
| 2044 | RMD2_MOUSE                    | Rmdn2   | Regulator of microtubule dynamics protein 2               | 0,0942397  | 0,0930664   |
| 2045 | PISD_MOUSE                    | Pisd    | Phosphatidylserine decarboxylase proenzyme, mitochondrial | 0,139286   | -0,117455   |
| 2046 | KS6B1_MOUSE                   | Rps6kb1 | Ribosomal protein S6 kinase beta-1                        | 0,168642   | -0,255527   |
| 2047 | PB1_MOUSE                     | Pbrn1   | Protein polybromo-1                                       | 0,0438557  | -0,0255455  |
| 2048 | ASPH_MOUSE                    | Asph    | Aspartyl/asparaginyl beta-hydroxylase                     | 1,02296    | -0,284893   |
| 2049 | CPNE3_MOUSE                   | Cpne3   | Copine-3                                                  | 0,6842     | -1,30588    |
| 2050 | SRRM2_MOUSE                   | Srrm2   | Serine/arginine repetitive matrix protein 2               | 0,774592   | 0,378376    |
| 2051 | FLNA_MOUSE                    | Flna    | Filamin-A                                                 | 0,47744    | -0,364258   |
| 2052 | DUS28_MOUSE                   | Dusp28  | Dual specificity phosphatase 28                           | 0,613361   | 0,563402    |
| 2053 | NUP54_MOUSE                   | Nup54   | Nuclear pore complex protein Nup54                        | 0,899072   | -0,560321   |
| 2054 | CPSF7_MOUSE                   | Cpsf7   | Cleavage and polyadenylation specificity factor subunit 7 | 0,296026   | -0,122895   |
| 2055 | EXOS6_MOUSE                   | Exosc6  | Exosome complex component MTR3                            | 0,01994    | 0,00933838  |
| 2056 | PAK4_MOUSE                    | Pak4    | Serine/threonine-protein kinase PAK 4                     | 0,422738   | 0,434448    |
| 2057 | KAT1_MOUSE                    | Kyat1   | Kynurenine--oxoglutarate transaminase 1                   | 0,715442   | -0,68559    |
| 2058 | SCFD2_MOUSE                   | Scfd2   | Sec1 family domain-containing protein 2                   | 0,142627   | 0,809373    |
| 2059 | GMPPB_MOUSE                   | Gmppb   | Mannose-1-phosphate guanylttransferase beta               | 0,0407147  | 0,117131    |
| 2060 | SEC62_MOUSE                   | Sec62   | Translocation protein SEC62                               | 2,64758    | 0,661737    |
| 2061 | SYIC_MOUSE                    | Iars    | Isoleucine--tRNA ligase, cytoplasmic                      | 0,649951   | 0,115409    |
| 2062 | RAP2C_MOUSE                   | Rap2c   | Ras-related protein Rap-2c                                | 0,210238   | -0,192009   |
| 2063 | ILVBL_MOUSE                   | Ilvbl   | Acetolactate synthase-like protein                        | 1,12617    | 0,783635    |
| 2064 | RM22_MOUSE                    | Mrpl22  | 39S ribosomal protein L22, mitochondrial                  | 0,0732229  | 0,123106    |
| 2065 | AIFM2_MOUSE                   | Aifm2   | Apoptosis-inducing factor 2                               | 0,839662   | 0,979709    |
| 2066 | HOOK3_MOUSE                   | Hook3   | Protein Hook homolog 3                                    | 1,51422    | 0,776489    |
| 2067 | DOCK1_MOUSE                   | Dock1   | Dedicator of cytokinesis protein 1                        | 0,344047   | 0,134271    |
| 2068 | GEPH_MOUSE                    | Gphn    | Gephyrin                                                  | 0,6652     | 0,363933    |
| 2069 | LDAH_MOUSE                    | Ldah    | Lipid droplet-associated hydrolase                        | 0,0149107  | 0,021035    |
| 2070 | VATH_MOUSE                    | Atp6v1h | V-type proton ATPase subunit H                            | 1,14648    | 0,388742    |
| 2071 | DPP9_MOUSE                    | Dpp9    | Dipeptidyl peptidase 9                                    | 2,44622    | 0,855169    |
| 2072 | DHPR_MOUSE                    | Qdpr    | Dihydropteridine reductase                                | 1,0259     | -0,308097   |
| 2073 | STX16_MOUSE                   | Stx16   | Syntaxin-16                                               | 1,38572    | 0,439839    |
| 2074 | PPME1_MOUSE                   | Ppme1   | Protein phosphatase methylesterase 1                      | 0,352457   | 0,122422    |
| 2075 | NUDT9_MOUSE                   | Nudt9   | ADP-ribose pyrophosphatase, mitochondrial                 | 1,47183    | 0,579341    |

|      |             |          |                                                           |           |            |
|------|-------------|----------|-----------------------------------------------------------|-----------|------------|
| 2076 | TRI14_MOUSE | Trim14   | Tripartite motif-containing protein 14                    | 1,02656   | -0,494736  |
| 2077 | RL1D1_MOUSE | Rsl1d1   | Ribosomal L1 domain-containing protein 1                  | 0,550963  | 0,101857   |
| 2078 | AOFB_MOUSE  | Maob     | Amine oxidase [flavin-containing] B                       | 0,122111  | -0,122665  |
| 2079 | SSDH_MOUSE  | Aldh5a1  | Succinate-semialdehyde dehydrogenase, mitochondrial       | 0,115821  | 0,0412621  |
| 2080 | GIMA5_MOUSE | Gimap5   | GTPase IMAP family member 5                               | 0,773337  | 1,03533    |
| 2081 | PGES2_MOUSE | Ptges2   | Prostaglandin E synthase 2                                | 0,119488  | 0,095343   |
| 2082 | ACOT4_MOUSE | Acot4    | Peroxisomal succinyl-coenzyme A thioesterase              | 0,100093  | 0,160025   |
| 2083 | TTPA_MOUSE  | Ttpa     | Alpha-tocopherol transfer protein                         | 0,157079  | 0,0698692  |
| 2084 | UD2A3_MOUSE | Ugt2a3   | UDP-glucuronosyltransferase 2A3                           | 0,0939922 | -0,0955601 |
| 2085 | VP35L_MOUSE | Vps35l   | VPS35 endosomal protein sorting factor-like               | 0,082641  | 0,141569   |
| 2086 | RHPN2_MOUSE | Rhpn2    | Rhopilin-2                                                | 0,0294227 | 0,0475925  |
| 2087 | GRIN3_MOUSE | Gprn3    | G protein-regulated inducer of neurite outgrowth 3        | 1,09129   | 0,501376   |
| 2088 | THIM_MOUSE  | Acaa2    | 3-ketoacyl-CoA thiolase, mitochondrial                    | 0,228132  | 0,084037   |
| 2089 | OSGEP_MOUSE | Osgep    | Probable tRNA N6-adenosine threonylcarbamoyltransferase   | 0,826081  | 1,16699    |
| 2090 | AT2L1_MOUSE | Etnppl   | Ethanolamine-phosphate phospho-lyase                      | 0,0255438 | -0,0224091 |
| 2091 | LARP4_MOUSE | Larp4    | La-related protein 4                                      | 0,772016  | 0,255219   |
| 2092 | PKN2_MOUSE  | Pkn2     | Serine/threonine-protein kinase N2                        | 0,831111  | 0,381527   |
| 2093 | ERF1_MOUSE  | Etf1     | Eukaryotic peptide chain release factor subunit 1         | 0,455167  | -0,211883  |
| 2094 | NAA25_MOUSE | Naa25    | N-alpha-acetyltransferase 25, NatB auxiliary subunit      | 0,189997  | -0,110383  |
| 2095 | KANK2_MOUSE | Kank2    | KN motif and ankyrin repeat domain-containing protein 2   | 0,187419  | -0,0972355 |
| 2096 | RBBP5_MOUSE | Rbbp5    | Retinoblastoma-binding protein 5                          | 0,315055  | -0,151977  |
| 2097 | PGAM5_MOUSE | Pgam5    | Serine/threonine-protein phosphatase PGAM5, mitochondrial | 1,03234   | 0,375226   |
| 2098 | GEM15_MOUSE | Gemin5   | Gem-associated protein 5                                  | 1,58907   | 0,2596     |
| 2099 | VP13C_MOUSE | Vps13c   | Vacuolar protein sorting-associated protein 13C           | 0,0478591 | 0,0315044  |
| 2100 | FND3A_MOUSE | Fndc3a   | Fibronectin type-III domain-containing protein 3A         | 0,368935  | 0,249622   |
| 2101 | OSBL2_MOUSE | Osbpl2   | Oxysterol-binding protein-related protein 2               | 1,49676   | 1,56892    |
| 2102 | COMD2_MOUSE | Commd2   | COMM domain-containing protein 2                          | 0,633803  | 0,3845     |
| 2103 | TMX3_MOUSE  | Tmx3     | Protein disulfide-isomerase TMX3                          | 0,200099  | 0,338495   |
| 2104 | HAT1_MOUSE  | Hat1     | Histone acetyltransferase type B catalytic subunit        | 0,749333  | 0,998552   |
| 2105 | UBP47_MOUSE | Usp47    | Ubiquitin carboxyl-terminal hydrolase 47                  | 0,143473  | 0,107295   |
| 2106 | TAOK3_MOUSE | Taok3    | Serine/threonine-protein kinase TAO3                      | 0,694374  | 0,356584   |
| 2107 | YTHD3_MOUSE | Ythd3    | YTH domain-containing family protein 3                    | 0,122295  | 0,048275   |
| 2108 | SYYM_MOUSE  | Yars2    | Tyrosine--tRNA ligase, mitochondrial                      | 0,80932   | -0,392201  |
| 2109 | TOIP2_MOUSE | Tor1aip2 | Torsin-1A-interacting protein 2                           | 1,03539   | 0,583437   |
| 2110 | RHG25_MOUSE | Arhgap25 | Rho GTPase-activating protein 25                          | 0,924078  | 0,666846   |
| 2111 | ABI3_MOUSE  | Abi3     | ABI gene family member 3                                  | 1,98874   | 0,695882   |
| 2112 | ELMO3_MOUSE | Elmo3    | Engulfment and cell motility protein 3                    | 0,0696808 | -0,0498158 |
| 2113 | ODC_MOUSE   | Slc25a21 | Mitochondrial 2-oxodicarboxylate carrier                  | 0,419213  | -0,264148  |
| 2114 | PAR12_MOUSE | Parp12   | Protein mono-ADP-ribosyltransferase PARP12                | 0,67341   | 0,237835   |
| 2115 | DYN3_MOUSE  | Dnm3     | Dynamin-3                                                 | 0,356898  | 0,666938   |
| 2116 | COAC_MOUSE  | Ppcdc    | Phosphopantothenoylcysteine decarboxylase                 | 0,836788  | 0,858025   |
| 2117 | NCBP3_MOUSE | Ncbp3    | Nuclear cap-binding protein subunit 3                     | 0,268072  | 0,160109   |
| 2118 | NHLC2_MOUSE | Nhlrc2   | NHL repeat-containing protein 2                           | 0,611331  | -0,203595  |
| 2119 | MAP1S_MOUSE | Map1s    | Microtubule-associated protein 1S                         | 1,24515   | 0,797463   |
| 2120 | ZHX2_MOUSE  | Zhx2     | Zinc fingers and homeoboxes protein 2                     | 0,989682  | 0,637095   |
| 2121 | SYFA_MOUSE  | Farsa    | Phenylalanine--tRNA ligase alpha subunit                  | 0,123595  | -0,114316  |
| 2122 | EFL1_MOUSE  | Efl1     | Elongation factor-like GTPase 1                           | 0,718042  | 0,442875   |
| 2123 | VP26B_MOUSE | Vps26b   | Vacuolar protein sorting-associated protein 26B           | 0,800819  | 0,263201   |
| 2124 | A16L1_MOUSE | Atg16l1  | Autophagy-related protein 16-1                            | 0,611869  | 0,375342   |
| 2125 | GDC_MOUSE   | Slc25a16 | Graves disease carrier protein homolog                    | 0,302498  | 0,117944   |
| 2126 | PAOX_MOUSE  | Paox     | Peroxisomal N(1)-acetyl-spermine/spermidine oxidase       | 0,210612  | 0,178462   |
| 2127 | COG5_MOUSE  | Cog5     | Conserved oligomeric Golgi complex subunit 5              | 0,0729225 | 0,038855   |



|      |             |          |                                                              |            |            |
|------|-------------|----------|--------------------------------------------------------------|------------|------------|
| 2128 | WDR59_MOUSE | Wdr59    | GATOR complex protein WDR59                                  | 1,12895    | 0,964104   |
| 2129 | DI3L1_MOUSE | Dis3l    | DIS3-like exonuclease 1                                      | 0,276012   | -0,33274   |
| 2130 | F234A_MOUSE | Fam234a  | Protein FAM234A                                              | 0,283707   | -0,182275  |
| 2131 | LCAP_MOUSE  | Lnpep    | Leucyl-cystinyl aminopeptidase                               | 0,599803   | -0,298388  |
| 2132 | P20D1_MOUSE | Pm20d1   | N-fatty-acyl-amino acid synthase/hydrolase PM20D1            | 0,54941    | -0,263658  |
| 2133 | CPNE1_MOUSE | Cpne1    | Copine-1                                                     | 1,1024     | 0,367587   |
| 2134 | CPSM_MOUSE  | Cps1     | Carbamoyl-phosphate synthase [ammonia], mitochondrial        | 0,10831    | 0,0660789  |
| 2135 | THOP1_MOUSE | Thop1    | Thimet oligopeptidase                                        | 1,38785    | 0,356605   |
| 2136 | SEP11_MOUSE | Septin11 | Septin-11                                                    | 0,458448   | 0,208546   |
| 2137 | IWS1_MOUSE  | Iws1     | Protein IWS1 homolog                                         | 0,707291   | 0,808299   |
| 2138 | PTCD1_MOUSE | Ptcd1    | Pentatricopeptide repeat-containing protein 1, mitochondrial | 0,32892    | 0,245743   |
| 2139 | RBM14_MOUSE | Rbm14    | RNA-binding protein 14                                       | 0,769374   | 0,237338   |
| 2140 | CASP9_MOUSE | Casp9    | Caspase-9                                                    | 1,29048    | 1,66672    |
| 2141 | GUF1_MOUSE  | Guf1     | Translation factor Guf1, mitochondrial                       | 2,52649    | -0,477719  |
| 2142 | HTR5B_MOUSE | Heatr5b  | HEAT repeat-containing protein 5B                            | 0,223503   | -0,220031  |
| 2143 | RAE1L_MOUSE | Rae1     | mRNA export factor                                           | 1,76731    | 0,487053   |
| 2144 | NAKD2_MOUSE | Nadk2    | NAD kinase 2, mitochondrial                                  | 0,117915   | -0,0771355 |
| 2145 | CWC22_MOUSE | Cwc22    | Pre-mRNA-splicing factor CWC22 homolog                       | 0,339997   | -0,156182  |
| 2146 | NT5D1_MOUSE | Nt5dc1   | 5'-nucleotidase domain-containing protein 1                  | 1,70395    | 2,36977    |
| 2147 | PRSR2_MOUSE | Proser2  | Proline and serine-rich protein 2                            | 0,187598   | -0,215893  |
| 2148 | CLMN_MOUSE  | Clmn     | Calmin                                                       | 0,113505   | 0,077663   |
| 2149 | TBCEL_MOUSE | Tbcel    | Tubulin-specific chaperone cofactor E-like protein           | 0,044198   | -0,031609  |
| 2150 | SEP10_MOUSE | Septin10 | Septin-10                                                    | 0,49361    | 0,219878   |
| 2151 | WDR26_MOUSE | Wdr26    | WD repeat-containing protein 26                              | 0,599737   | -0,359936  |
| 2152 | CO6A6_MOUSE | Col6a6   | Collagen alpha-6(VI) chain                                   | 0,281914   | -0,518025  |
| 2153 | STBD1_MOUSE | Stbd1    | Starch-binding domain-containing protein 1                   | 0,483748   | 0,289977   |
| 2154 | CSTFT_MOUSE | Cstf2t   | Cleavage stimulation factor subunit 2 tau variant            | 0,874772   | 0,495427   |
| 2155 | APOA5_MOUSE | Apoa5    | Apolipoprotein A-V                                           | 1,18566    | 0,651405   |
| 2156 | MMAA_MOUSE  | Mmaa     | Methylmalonic aciduria type A homolog, mitochondrial         | 0,211      | 0,0943569  |
| 2157 | RBM4_MOUSE  | Rbm4     | RNA-binding protein 4                                        | 0,321983   | 0,258806   |
| 2158 | UBA6_MOUSE  | Uba6     | Ubiquitin-like modifier-activating enzyme 6                  | 0,53041    | 0,222373   |
| 2159 | UTP15_MOUSE | Utp15    | U3 small nucleolar RNA-associated protein 15 homolog         | 0,422192   | -0,310003  |
| 2160 | EMC1_MOUSE  | Emc1     | ER membrane protein complex subunit 1                        | 0,317311   | 0,100379   |
| 2161 | MYEF2_MOUSE | Myef2    | Myelin expression factor 2                                   | 0,46645    | 0,18427    |
| 2162 | LIPB1_MOUSE | Pfifbp1  | Liprin-beta-1                                                | 0,0947393  | -0,0385601 |
| 2163 | DIDO1_MOUSE | Dido1    | Death-inducer obliterator 1                                  | 0,0825265  | 0,0863323  |
| 2164 | PGM2L_MOUSE | Pgm2l1   | Glucose 1,6-bisphosphate synthase                            | 0,719631   | 0,509325   |
| 2165 | CAF17_MOUSE | Iba57    | Putative transferase CAF17 homolog, mitochondrial            | 0,728017   | 0,896618   |
| 2166 | RYDEN_MOUSE | Ryden    | Repressor of yield of DENV protein homolog                   | 1,19211    | 0,446339   |
| 2167 | MIC60_MOUSE | Immt     | MICOS complex subunit Mic60                                  | 0,073894   | 0,0358398  |
| 2168 | PARP9_MOUSE | Parp9    | Protein mono-ADP-ribosyltransferase PARP9                    | 0,997827   | 0,491103   |
| 2169 | THIC_MOUSE  | Acat2    | Acetyl-CoA acetyltransferase, cytosolic                      | 0,547978   | 0,415954   |
| 2170 | ELOA1_MOUSE | Eloa     | Elongin-A                                                    | 0,479353   | 0,682163   |
| 2171 | ABI1_MOUSE  | Abi1     | Abl interactor 1                                             | 0,232095   | 0,274041   |
| 2172 | GATC_MOUSE  | Gatc     | Glutamyl-tRNA(Gln) amidotransferase subunit C, mitochondrial | 0,189992   | -0,30984   |
| 2173 | PNCB_MOUSE  | Naprt    | Nicotinate phosphoribosyltransferase                         | 0,309022   | 0,0647335  |
| 2174 | VWA8_MOUSE  | Vwa8     | von Willebrand factor A domain-containing protein 8          | 0,172448   | -0,0591244 |
| 2175 | VPS53_MOUSE | Vps53    | Vacuolar protein sorting-associated protein 53 homolog       | 0,00653348 | 0,0060791  |
| 2176 | PRP31_MOUSE | Prpf31   | U4/U6 small nuclear ribonucleoprotein Prp31                  | 1,13435    | 0,288769   |
| 2177 | UFL1_MOUSE  | Ufl1     | E3 UFM1-protein ligase 1                                     | 0,172883   | 0,109467   |
| 2178 | BCAS3_MOUSE | Bcas3    | Breast carcinoma-amplified sequence 3 homolog                | 0,532157   | 0,32564    |
| 2179 | NEMF_MOUSE  | Nemf     | Nuclear export mediator factor Nemf                          | 2,09221    | 0,579564   |

|      |                                  |                      |                                                                         |            |             |
|------|----------------------------------|----------------------|-------------------------------------------------------------------------|------------|-------------|
| 2180 | PABP2_MOUSE                      | Pabpn1               | Polyadenylate-binding protein 2                                         | 0,0512941  | 0,0325848   |
| 2181 | TTC27_MOUSE                      | Ttc27                | Tetratricopeptide repeat protein 27                                     | 0,686995   | 0,799102    |
| 2182 | SAC2_MOUSE                       | Inpp5f               | Phosphatidylinositol phosphatase SAC2                                   | 0,638959   | -0,315097   |
| 2183 | VCIP1_MOUSE                      | Vcpi1                | Deubiquitinating protein VCIP135                                        | 1,3978     | 0,234094    |
| 2184 | STON1_MOUSE                      | Ston1                | Stonin-1                                                                | 0,359381   | 0,188245    |
| 2185 | TXNL1_MOUSE                      | Txnl1                | Thioredoxin-like protein 1                                              | 1,17444    | 0,398537    |
| 2186 | TRM6_MOUSE                       | Trmt6                | tRNA (adenine(58)-N(1))-methyltransferase non-catalytic subunit TRM6    | 1,16303    | 0,633166    |
| 2187 | RDH13_MOUSE                      | Rdh13                | Retinol dehydrogenase 13                                                | 0,0895396  | -0,0413929  |
| 2188 | NAA30_MOUSE                      | Naa30                | N-alpha-acetyltransferase 30                                            | 0,17912    | -0,124557   |
| 2189 | TAB1_MOUSE                       | Tab1                 | TGF-beta-activated kinase 1 and MAP3K7-binding protein 1                | 0,5628     | 0,556819    |
| 2190 | GCST_MOUSE                       | Amt                  | Aminomethyltransferase, mitochondrial                                   | 0,30009    | 0,155629    |
| 2191 | SNX8_MOUSE                       | Snx8                 | Sorting nexin-8                                                         | 0,634503   | 0,378072    |
| 2192 | HPF1_MOUSE                       | Hpf1                 | Histone PARylation factor 1                                             | 1,15827    | -1,07117    |
| 2193 | SYPM_MOUSE                       | Pars2                | Probable proline--tRNA ligase, mitochondrial                            | 0,230426   | -0,271564   |
| 2194 | RPB2_MOUSE                       | Poir2b               | DNA-directed RNA polymerase II subunit RPB2                             | 0,177433   | -0,0850872  |
| 2195 | S2545_MOUSE                      | Slc25a45             | Solute carrier family 25 member 45                                      | 1,40118    | 0,512387    |
| 2196 | AQR_MOUSE                        | Aqr                  | RNA helicase aquarius                                                   | 0,361814   | 0,152972    |
| 2197 | RIFK_MOUSE                       | Rfk                  | Riboflavin kinase                                                       | 0,00836053 | -0,00899696 |
| 2198 | G6PE_MOUSE                       | H6pd                 | GDH/6PGL endoplasmic bifunctional protein                               | 1,09282    | 0,385744    |
| 2199 | CS1A_MOUSE                       | C1sa                 | Complement C1s-A subcomponent                                           | 0,633411   | 0,478553    |
| 2200 | C1RA_MOUSE                       | C1ra                 | Complement C1r-A subcomponent                                           | 0,964029   | 0,403       |
| 2201 | SMC2_MOUSE                       | Smc2                 | Structural maintenance of chromosomes protein 2                         | 0,538641   | 0,26392     |
| 2202 | RAB43_MOUSE                      | Rab43                | Ras-related protein Rab-43                                              | 1,30672    | 0,370105    |
| 2203 | ARHL2_MOUSE                      | Adprhl2              | ADP-ribose glycohydrolase ARH3                                          | 0,846809   | 0,240579    |
| 2204 | ARK72_MOUSE                      | Akr7a2               | Aflatoxin B1 aldehyde reductase member 2                                | 1,55539    | 0,285168    |
| 2205 | ASPP2_MOUSE                      | Tp53bp2              | Apoptosis-stimulating of p53 protein 2                                  | 0,822924   | 0,338322    |
| 2206 | PPM1F_MOUSE                      | Ppm1f                | Protein phosphatase 1F                                                  | 0,891146   | 0,485361    |
| 2207 | TNS2_MOUSE                       | Tns2                 | Tensin-2                                                                | 0,136643   | 0,113025    |
| 2208 | RBM28_MOUSE                      | Rbm28                | RNA-binding protein 28                                                  | 0,121941   | 0,0734276   |
| 2209 | SYEP_MOUSE                       | Eprs                 | Bifunctional glutamate/proline--tRNA ligase                             | 0,705359   | 0,480014    |
| 2210 | TCRG1_MOUSE                      | Tcerg1               | Transcription elongation regulator 1                                    | 0,541146   | 0,389513    |
| 2211 | LONM_MOUSE                       | Lonp1                | Lon protease homolog, mitochondrial                                     | 0,361653   | 0,29537     |
| 2212 | H2B3A_MOUSE;H2E Hist3h2ba;Hist3h | Histone H2B type 3-B |                                                                         | 0,223233   | -0,839099   |
| 2213 | OGT1_MOUSE                       | Ogt                  | UDP-N-acetylglucosamine--peptide N-acetylglucosaminyltransferase 110 kD | 0,227792   | 0,0879608   |
| 2214 | CHERP_MOUSE                      | Cherp                | Calcium homeostasis endoplasmic reticulum protein                       | 0,28991    | 0,122749    |
| 2215 | CCAR1_MOUSE                      | Ccar1                | Cell division cycle and apoptosis regulator protein 1                   | 0,152398   | 0,112252    |
| 2216 | SLTM_MOUSE                       | Sltm                 | SAFB-like transcription modulator                                       | 0,575638   | 0,579611    |
| 2217 | NUDT6_MOUSE                      | Nudt6                | Nucleoside diphosphate-linked moiety X motif 6                          | 0,288453   | 0,432916    |
| 2218 | GCC2_MOUSE                       | Gcc2                 | GRIP and coiled-coil domain-containing protein 2                        | 1,18533    | 0,454697    |
| 2219 | SEPT8_MOUSE                      | Septin8              | Septin-8                                                                | 1,03143    | 0,474028    |
| 2220 | PYM1_MOUSE                       | Pym1                 | Partner of Y14 and mago                                                 | 1,19212    | 0,488522    |
| 2221 | PHC3_MOUSE                       | Phc3                 | Polyhomeotic-like protein 3                                             | 1,73613    | 0,903966    |
| 2222 | PGP_MOUSE                        | Pgp                  | Glycerol-3-phosphate phosphatase                                        | 1,43696    | 0,575294    |
| 2223 | FBX4_MOUSE                       | Fbxo4                | F-box only protein 4                                                    | 0,63934    | 0,551349    |
| 2224 | NT8F2_MOUSE                      | Nat8f2               | N-acetyltransferase family 8 member 2                                   | 0,116926   | -0,165529   |
| 2225 | DPYD_MOUSE                       | Dpyd                 | Dihydropyrimidine dehydrogenase [NADP(+)]                               | 0,716241   | -0,35391    |
| 2226 | AL4A1_MOUSE                      | Aldh4a1              | Delta-1-pyrroline-5-carboxylate dehydrogenase, mitochondrial            | 0,0284787  | -0,0170834  |
| 2227 | NGEF_MOUSE                       | Ngef                 | Ephexin-1                                                               | 0,955561   | -0,675282   |
| 2228 | EI2BE_MOUSE                      | Eif2b5               | Translation initiation factor eIF-2B subunit epsilon                    | 0,311954   | 0,31771     |
| 2229 | P66A_MOUSE                       | Gatad2a              | Transcriptional repressor p66 alpha                                     | 1,01935    | 1,0104      |
| 2230 | COG3_MOUSE                       | Cog3                 | Conserved oligomeric Golgi complex subunit 3                            | 0,647268   | 0,842055    |
| 2231 | SLAI2_MOUSE                      | Slain2               | SLAIN motif-containing protein 2                                        | 0,970677   | 0,538036    |

|      |              |          |                                                                   |           |            |
|------|--------------|----------|-------------------------------------------------------------------|-----------|------------|
| 2232 | GNL3_MOUSE   | Gnl3     | Guanine nucleotide-binding protein-like 3                         | 0,197031  | 0,111776   |
| 2233 | C19L1_MOUSE  | Cwf19l1  | CWF19-like protein 1                                              | 0,191052  | -0,297008  |
| 2234 | PDLI5_MOUSE  | Pdlim5   | PDZ and LIM domain protein 5                                      | 0,581661  | 0,380249   |
| 2235 | STEAP3_MOUSE | Steap3   | Metalloreductase STEAP3                                           | 0,987321  | 1,95378    |
| 2236 | DISL2_MOUSE  | Dis3l2   | DIS3-like exonuclease 2                                           | 1,06313   | 0,218158   |
| 2237 | RMND1_MOUSE  | Rmnd1    | Required for meiotic nuclear division protein 1 homolog           | 0,0815116 | -0,11627   |
| 2238 | PYGB_MOUSE   | Pygb     | Glycogen phosphorylase, brain form                                | 0,398694  | -0,120979  |
| 2239 | OSB11_MOUSE  | Osbpl11  | Oxysterol-binding protein-related protein 11                      | 0,276144  | 0,181796   |
| 2240 | FERM2_MOUSE  | Ferm2    | Fermitin family homolog 2                                         | 0,110911  | 0,0455406  |
| 2241 | FA20A_MOUSE  | Fam20a   | Pseudokinase FAM20A                                               | 0,123024  | 0,0686684  |
| 2242 | PAR10_MOUSE  | Parp10   | Protein mono-ADP-ribosyltransferase PARP10                        | 0,848509  | 0,627068   |
| 2243 | COPA_MOUSE   | Copa     | Coatomer subunit alpha                                            | 1,0728    | 0,505145   |
| 2244 | BTD_MOUSE    | Btd      | Biotinidase                                                       | 1,44253   | 0,932742   |
| 2245 | ANM5_MOUSE   | Prmt5    | Protein arginine N-methyltransferase 5                            | 0,750973  | 0,402912   |
| 2246 | PLCG2_MOUSE  | Plcg2    | 1-phosphatidylinositol 4,5-bisphosphate phosphodiesterase gamma-2 | 0,313453  | 0,409399   |
| 2247 | CP2DQ_MOUSE  | Cyp2d26  | Cytochrome P450 2D26                                              | 0,122907  | -0,151976  |
| 2248 | INT4_MOUSE   | Ints4    | Integrator complex subunit 4                                      | 0,4946    | 0,45706    |
| 2249 | PAK2_MOUSE   | Pak2     | Serine/threonine-protein kinase PAK 2                             | 0,208748  | -0,090881  |
| 2250 | TBCE_MOUSE   | Tbce     | Tubulin-specific chaperone E                                      | 0,737631  | -0,281686  |
| 2251 | VWF_MOUSE    | Vwf      | von Willebrand factor                                             | 0,449698  | 0,383487   |
| 2252 | CIP4_MOUSE   | Trip10   | Cdc42-interacting protein 4                                       | 0,2696    | 0,664502   |
| 2253 | ELYS_MOUSE   | Ahctf1   | Protein ELYS                                                      | 2,44696   | 1,0053     |
| 2254 | AGO3_MOUSE   | Ago3     | Protein argonaute-3                                               | 0,579135  | 0,296531   |
| 2255 | AGO2_MOUSE   | Ago2     | Protein argonaute-2                                               | 0,232057  | -0,0951038 |
| 2256 | HMCS1_MOUSE  | Hmgcs1   | Hydroxymethylglutaryl-CoA synthase, cytoplasmic                   | 0,946318  | -0,60917   |
| 2257 | THTPA_MOUSE  | Thtpa    | Thiamine-triphosphatase                                           | 0,377988  | 0,658632   |
| 2258 | TFB1M_MOUSE  | Tfb1m    | Dimethyladenosine transferase 1, mitochondrial                    | 0,134075  | 0,0844078  |
| 2259 | CDC73_MOUSE  | Cdc73    | Parafibromin                                                      | 1,05908   | 0,61189    |
| 2260 | ACAD9_MOUSE  | Acad9    | Acyl-CoA dehydrogenase family member 9, mitochondrial             | 0,129888  | -0,0788826 |
| 2261 | MIRO2_MOUSE  | Rhot2    | Mitochondrial Rho GTPase 2                                        | 0,712353  | 1,27879    |
| 2262 | AFG32_MOUSE  | Afg3l2   | AFG3-like protein 2                                               | 0,0639219 | 0,0400997  |
| 2263 | EIF3B_MOUSE  | Eif3b    | Eukaryotic translation initiation factor 3 subunit B              | 0,604413  | -0,231456  |
| 2264 | ACSL5_MOUSE  | Acsf5    | Long-chain-fatty-acid--CoA ligase 5                               | 1,3399    | 0,608212   |
| 2265 | LIN7A_MOUSE  | Lin7a    | Protein lin-7 homolog A                                           | 0,864643  | 0,404958   |
| 2266 | RM48_MOUSE   | Mrpl48   | 39S ribosomal protein L48, mitochondrial                          | 0,142766  | -0,100618  |
| 2267 | TXTP_MOUSE   | Slc25a1  | Tricarboxylate transport protein, mitochondrial                   | 0,27406   | 0,171725   |
| 2268 | NAGA_MOUSE   | Amdhd2   | N-acetylglucosamine-6-phosphate deacetylase                       | 0,308512  | 0,45312    |
| 2269 | SPF45_MOUSE  | Rbm17    | Splicing factor 45                                                | 0,173843  | 0,139099   |
| 2270 | MRPP3_MOUSE  | Prorp    | Mitochondrial ribonuclease P catalytic subunit                    | 0,185811  | -0,178133  |
| 2271 | UD3A2_MOUSE  | Ugt3a2   | UDP-glucuronosyltransferase 3A2                                   | 0,0332673 | 0,0315403  |
| 2272 | AGRL2_MOUSE  | Adgrl2   | Adhesion G protein-coupled receptor L2                            | 1,43548   | 1,58738    |
| 2273 | OPLA_MOUSE   | Oplah    | 5-oxoprolinase                                                    | 1,4809    | 0,574147   |
| 2274 | FBP1L_MOUSE  | Fnbp1l   | Formin-binding protein 1-like                                     | 2,6401    | 1,11129    |
| 2275 | BCLF1_MOUSE  | Bclaf1   | Bcl-2-associated transcription factor 1                           | 0,531803  | -0,197923  |
| 2276 | AKC1H_MOUSE  | Akr1c18  | Aldo-keto reductase family 1 member C18                           | 0,355322  | -0,665307  |
| 2277 | CP51A_MOUSE  | Cyp51a1  | Lanosterol 14-alpha demethylase                                   | 0,363837  | -0,397197  |
| 2278 | EFGM_MOUSE   | Gfm1     | Elongation factor G, mitochondrial                                | 0,10488   | -0,066457  |
| 2279 | FIBB_MOUSE   | Fgb      | Fibrinogen beta chain                                             | 0,035296  | -0,0287567 |
| 2280 | ESRP2_MOUSE  | Esrp2    | Epithelial splicing regulatory protein 2                          | 0,118695  | 0,0553192  |
| 2281 | ZBT20_MOUSE  | Zbtb20   | Zinc finger and BTB domain-containing protein 20                  | 0,216985  | 0,158898   |
| 2282 | RHG18_MOUSE  | Arhgap18 | Rho GTPase-activating protein 18                                  | 0,260282  | 0,487415   |
| 2283 | CNOT3_MOUSE  | Cnot3    | CCR4-NOT transcription complex subunit 3                          | 0,527818  | 0,348623   |

|      |             |          |                                                                          |            |            |
|------|-------------|----------|--------------------------------------------------------------------------|------------|------------|
| 2284 | TACO1_MOUSE | Taco1    | Translational activator of cytochrome c oxidase 1                        | 0,659198   | 0,669915   |
| 2285 | PKHO2_MOUSE | Plekho2  | Pleckstrin homology domain-containing family O member 2                  | 0,300551   | -0,12428   |
| 2286 | GALM_MOUSE  | Galm     | Aldose 1-epimerase                                                       | 1,13894    | 1,06511    |
| 2287 | CO8A_MOUSE  | C8a      | Complement component C8 alpha chain                                      | 2,55146    | 0,821595   |
| 2288 | PDXK_MOUSE  | Pdxk     | Pyridoxal kinase                                                         | 0,593908   | 0,645486   |
| 2289 | COXM2_MOUSE | Cmc2     | COX assembly mitochondrial protein 2 homolog                             | 0,547106   | 0,627691   |
| 2290 | C2D1A_MOUSE | Cc2d1a   | Coiled-coil and C2 domain-containing protein 1A                          | 1,44824    | 1,26676    |
| 2291 | STX5_MOUSE  | Stx5     | Syntaxin-5                                                               | 0,234892   | 0,0730785  |
| 2292 | ALKB3_MOUSE | Alkbh3   | Alpha-ketoglutarate-dependent dioxygenase alkB homolog 3                 | 0,293947   | 0,259301   |
| 2293 | TDRD7_MOUSE | Tdrd7    | Tudor domain-containing protein 7                                        | 0,294848   | 0,249368   |
| 2294 | SPP24_MOUSE | Spp2     | Secreted phosphoprotein 24                                               | 0,335957   | 0,327024   |
| 2295 | WIPF1_MOUSE | Wipf1    | WAS/WASL-interacting protein family member 1                             | 0,482894   | 0,180857   |
| 2296 | TRNT1_MOUSE | Trnt1    | CCA tRNA nucleotidyltransferase 1, mitochondrial                         | 0,136866   | -0,160666  |
| 2297 | DNM1L_MOUSE | Dnm1l    | Dynamin-1-like protein                                                   | 1,0143     | -0,352351  |
| 2298 | PLPL8_MOUSE | Prpla8   | Calcium-independent phospholipase A2-gamma                               | 1,28306    | -0,585342  |
| 2299 | PHLB2_MOUSE | Phldb2   | Pleckstrin homology-like domain family B member 2                        | 0,474764   | 0,226596   |
| 2300 | SPAS2_MOUSE | Spats2   | Spermatogenesis-associated serine-rich protein 2                         | 0,620541   | 0,58271    |
| 2301 | PNPT1_MOUSE | Pnpt1    | Polyribonucleotide nucleotidyltransferase 1, mitochondrial               | 1,15085    | 0,34413    |
| 2302 | NEK9_MOUSE  | Nek9     | Serine/threonine-protein kinase Nek9                                     | 0,641028   | -0,462592  |
| 2303 | WDR11_MOUSE | Wdr11    | WD repeat-containing protein 11                                          | 0,234254   | 0,165665   |
| 2304 | KPCD3_MOUSE | Prkd3    | Serine/threonine-protein kinase D3                                       | 0,697886   | -0,786536  |
| 2305 | COQ9_MOUSE  | Coq9     | Ubiquinone biosynthesis protein COQ9, mitochondrial                      | 0,869734   | -0,552087  |
| 2306 | LYRM4_MOUSE | Lym4     | Lyr motif-containing protein 4                                           | 0,512954   | 0,331906   |
| 2307 | NAT10_MOUSE | Nat10    | RNA cytidine acetyltransferase                                           | 1,6648     | 0,262538   |
| 2308 | UVRAG_MOUSE | Uvrag    | UV radiation resistance-associated protein                               | 1,05872    | 0,462172   |
| 2309 | ABCF3_MOUSE | Abcf3    | ATP-binding cassette sub-family F member 3                               | 0,00979336 | -0,0100945 |
| 2310 | KT3K_MOUSE  | Fn3krp   | Ketosamine-3-kinase                                                      | 0,204692   | -0,337716  |
| 2311 | TF3C1_MOUSE | Gtf3c1   | General transcription factor 3C polypeptide 1                            | 0,083487   | 0,0309643  |
| 2312 | GT251_MOUSE | Colgalt1 | Procollagen galactosyltransferase 1                                      | 0,674479   | 0,51206    |
| 2313 | SDHA_MOUSE  | Sdha     | Succinate dehydrogenase [ubiquinone] flavoprotein subunit, mitochondrial | 0,0673601  | -0,0349113 |
| 2314 | SIR5_MOUSE  | Sirt5    | NAD-dependent protein deacetylase sirtuin-5, mitochondrial               | 0,431587   | 0,284167   |
| 2315 | OS9_MOUSE   | Os9      | Protein OS-9                                                             | 0,339115   | 0,338394   |
| 2316 | GPAT4_MOUSE | Gpat4    | Glycerol-3-phosphate acyltransferase 4                                   | 1,17815    | 0,544313   |
| 2317 | HACD3_MOUSE | Hacd3    | Very-long-chain (3R)-3-hydroxyacyl-CoA dehydratase 3                     | 0,196115   | -0,276266  |
| 2318 | EDC3_MOUSE  | Edc3     | Enhancer of mRNA-decapping protein 3                                     | 0,197004   | 0,0605549  |
| 2319 | LS14A_MOUSE | Lsm14a   | Protein LSM14 homolog A                                                  | 0,517765   | -0,733085  |
| 2320 | FMO2_MOUSE  | Fmo2     | Dimethylaniline monooxygenase [N-oxide-forming] 2                        | 0,0848371  | -0,0368492 |
| 2321 | MANBA_MOUSE | Manba    | Beta-mannosidase                                                         | 0,26697    | 0,355304   |
| 2322 | AGFG1_MOUSE | Agfg1    | Arf-GAP domain and FG repeat-containing protein 1                        | 0,0621576  | -0,138726  |
| 2323 | RM38_MOUSE  | Mrpl38   | 39S ribosomal protein L38, mitochondrial                                 | 0,0936402  | 0,0634644  |
| 2324 | COMD9_MOUSE | Commd9   | COMM domain-containing protein 9                                         | 0,337726   | 0,121848   |
| 2325 | SHOT1_MOUSE | Shtn1    | Shootin-1                                                                | 0,400142   | 0,353435   |
| 2326 | NMRL1_MOUSE | Nmral1   | Nmra-like family domain-containing protein 1                             | 0,335944   | 0,171175   |
| 2327 | UQCC3_MOUSE | Uqcc3    | Ubiquinol-cytochrome-c reductase complex assembly factor 3               | 0,232152   | -0,200957  |
| 2328 | PAF1_MOUSE  | Paf1     | RNA polymerase II-associated factor 1 homolog                            | 0,154652   | 0,0834667  |
| 2329 | PP4R1_MOUSE | Ppp4r1   | Serine/threonine-protein phosphatase 4 regulatory subunit 1              | 0,441257   | 0,289208   |
| 2330 | RM47_MOUSE  | Mrpl47   | 39S ribosomal protein L47, mitochondrial                                 | 0,161462   | 0,0776749  |
| 2331 | MATR3_MOUSE | Matr3    | Matrin-3                                                                 | 0,107615   | 0,082238   |
| 2332 | CHAP1_MOUSE | Champ1   | Chromosome alignment-maintaining phosphoprotein 1                        | 0,0215712  | -0,0321049 |
| 2333 | SSH3_MOUSE  | Ssh3     | Protein phosphatase Slingshot homolog 3                                  | 0,248545   | -0,14777   |
| 2334 | I5P2_MOUSE  | Inpp5b   | Type II inositol 1,4,5-trisphosphate 5-phosphatase                       | 1,11971    | 0,846643   |
| 2335 | CBR3_MOUSE  | Cbr3     | Carbonyl reductase [NADPH] 3                                             | 0,492001   | -1,3394    |

|      |             |         |                                                                       |            |             |
|------|-------------|---------|-----------------------------------------------------------------------|------------|-------------|
| 2336 | ACD10_MOUSE | Acad10  | Acyl-CoA dehydrogenase family member 10                               | 0,356766   | -0,23266    |
| 2337 | DEN1A_MOUSE | Dennd1a | DENN domain-containing protein 1A                                     | 0,133449   | -0,225493   |
| 2338 | FRRS1_MOUSE | FRRS1   | Ferric-chelate reductase 1                                            | 0,850984   | -0,424688   |
| 2339 | MEPCE_MOUSE | Mepce   | 7SK snRNA methylphosphate capping enzyme                              | 0,543127   | 0,204292    |
| 2340 | LZIC_MOUSE  | Lzic    | Protein LZIC                                                          | 0,998495   | 0,482136    |
| 2341 | VRK3_MOUSE  | Vrk3    | Inactive serine/threonine-protein kinase VRK3                         | 0,583484   | 0,320437    |
| 2342 | DP13B_MOUSE | Appl2   | DCC-interacting protein 13-beta                                       | 0,177724   | -0,301505   |
| 2343 | DP13A_MOUSE | Appl1   | DCC-interacting protein 13-alpha                                      | 0,630843   | 0,472668    |
| 2344 | NDUS8_MOUSE | Ndufs8  | NADH dehydrogenase [ubiquinone] iron-sulfur protein 8, mitochondrial  | 1,01475    | 0,415523    |
| 2345 | OPTN_MOUSE  | Optn    | Optineurin                                                            | 0,390897   | 0,52137     |
| 2346 | CASC3_MOUSE | Casc3   | Protein CASC3                                                         | 0,526128   | 0,46553     |
| 2347 | DPOLB_MOUSE | Polb    | DNA polymerase beta                                                   | 0,803856   | 0,565337    |
| 2348 | PREP_MOUSE  | Pitrm1  | Presequence protease, mitochondrial                                   | 0,400341   | 0,275226    |
| 2349 | ABC8B_MOUSE | Abca8b  | ATP-binding cassette sub-family A member 8-B                          | 1,51892    | 0,417524    |
| 2350 | ABCA6_MOUSE | Abca6   | ATP-binding cassette sub-family A member 6                            | 0,766289   | -0,208939   |
| 2351 | MTA1_MOUSE  | Mta1    | Metastasis-associated protein MTA1                                    | 0,19125    | 0,10495     |
| 2352 | ABHDB_MOUSE | Abhd11  | Protein ABHD11                                                        | 0,962561   | 0,448441    |
| 2353 | LTBP4_MOUSE | Ltbp4   | Latent-transforming growth factor beta-binding protein 4              | 0,0388302  | 0,0586136   |
| 2354 | ABLM1_MOUSE | Ablim1  | Actin-binding LIM protein 1                                           | 0,0513736  | 0,0477718   |
| 2355 | KFA_MOUSE   | Afmid   | Kynurenine formamidase                                                | 0,326863   | -0,160326   |
| 2356 | PANK1_MOUSE | Pank1   | Pantothenate kinase 1                                                 | 0,978665   | -0,351203   |
| 2357 | DDX54_MOUSE | Ddx54   | ATP-dependent RNA helicase DDX54                                      | 0,366027   | 0,370721    |
| 2358 | SVIL_MOUSE  | Svil    | Supervillin                                                           | 0,27875    | 0,198848    |
| 2359 | COMD1_MOUSE | Comm1   | COMM domain-containing protein 1                                      | 0,155486   | 0,082613    |
| 2360 | WDR33_MOUSE | Wdr33   | pre-mRNA 3' end processing protein WDR33                              | 0,199187   | -0,0811394  |
| 2361 | RPTOR_MOUSE | Rptor   | Regulatory-associated protein of mTOR                                 | 0,184043   | -0,0721539  |
| 2362 | COL12_MOUSE | Colec12 | Collectin-12                                                          | 0,79286    | 0,601409    |
| 2363 | PITC1_MOUSE | Pitpnc1 | Cytoplasmic phosphatidylinositol transfer protein 1                   | 0,117311   | -0,0602493  |
| 2364 | NNRE_MOUSE  | Naxe    | NAD(P)H-hydrate epimerase                                             | 0,685884   | -0,315753   |
| 2365 | SF3A1_MOUSE | Sf3a1   | Splicing factor 3A subunit 1                                          | 0,0634267  | 0,0566418   |
| 2366 | DCAF8_MOUSE | Dcaf8   | DDB1- and CUL4-associated factor 8                                    | 0,579702   | 0,49362     |
| 2367 | EST2A_MOUSE | Ces2a   | Pyrethroid hydrolase Ces2a                                            | 0,0483933  | 0,0446983   |
| 2368 | ALAT1_MOUSE | Gpt     | Alanine aminotransferase 1                                            | 0,229239   | -0,179319   |
| 2369 | HIBCH_MOUSE | Hibch   | 3-hydroxyisobutyryl-CoA hydrolase, mitochondrial                      | 1,30809    | 0,367067    |
| 2370 | THIL_MOUSE  | Acat1   | Acetyl-CoA acetyltransferase, mitochondrial                           | 0,668648   | -0,524521   |
| 2371 | INT13_MOUSE | Ints13  | Integrator complex subunit 13                                         | 0,920691   | 0,489683    |
| 2372 | EIF3L_MOUSE | Eif3l   | Eukaryotic translation initiation factor 3 subunit L                  | 0,820155   | -0,520021   |
| 2373 | GLCTK_MOUSE | Glyctk  | Glycerate kinase                                                      | 0,907747   | 0,181079    |
| 2374 | AIMP2_MOUSE | Aimp2   | Aminoacyl tRNA synthase complex-interacting multifunctional protein 2 | 0,299241   | 0,117226    |
| 2375 | BL1S5_MOUSE | Bloc1s5 | Biogenesis of lysosome-related organelles complex 1 subunit 5         | 0,218184   | 0,159364    |
| 2376 | BLMH_MOUSE  | Blmh    | Bleomycin hydrolase                                                   | 1,02616    | -0,612421   |
| 2377 | ICT1_MOUSE  | Mrpl58  | Peptidyl-tRNA hydrolase ICT1, mitochondrial                           | 0,791802   | 0,270863    |
| 2378 | ERF3A_MOUSE | Gspt1   | Eukaryotic peptide chain release factor GTP-binding subunit ERF3A     | 1,01827    | 0,481992    |
| 2379 | GALE_MOUSE  | Gale    | UDP-glucose 4-epimerase                                               | 1,74382    | 0,551118    |
| 2380 | HNRP1_MOUSE | Hnmp1   | Heterogeneous nuclear ribonucleoprotein L                             | 0,776143   | 0,195216    |
| 2381 | SUOX_MOUSE  | Suox    | Sulfite oxidase, mitochondrial                                        | 0,257199   | -0,110085   |
| 2382 | ILKAP_MOUSE | Ilkap   | Integrin-linked kinase-associated serine/threonine phosphatase 2C     | 1,51039    | 0,518017    |
| 2383 | FAHD1_MOUSE | Fahd1   | Acylpyruvase FAHD1, mitochondrial                                     | 0,00806459 | -0,00367355 |
| 2384 | S14L4_MOUSE | Sec14l4 | SEC14-like protein 4                                                  | 0,00395677 | 0,00192528  |
| 2385 | GGA1_MOUSE  | Gga1    | ADP-ribosylation factor-binding protein GGA1                          | 1,27419    | 0,319613    |
| 2386 | TM134_MOUSE | Tmem134 | Transmembrane protein 134                                             | 0,554176   | 0,381869    |
| 2387 | GNTK_MOUSE  | Idnk    | Probable gluconokinase                                                | 0,255023   | 0,108394    |

|      |             |           |                                                              |           |            |
|------|-------------|-----------|--------------------------------------------------------------|-----------|------------|
| 2388 | HOT_MOUSE   | Adhfe1    | Hydroxyacid-oxoacid transhydrogenase, mitochondrial          | 0,0228307 | -0,0220482 |
| 2389 | AAMDC_MOUSE | Aamdc     | Mth938 domain-containing protein                             | 1,10635   | -1,00142   |
| 2390 | IQEC1_MOUSE | Iqsec1    | IQ motif and SEC7 domain-containing protein 1                | 0,457113  | 0,309486   |
| 2391 | I23O2_MOUSE | Ido2      | Indoleamine 2,3-dioxygenase 2                                | 0,71712   | -0,456596  |
| 2392 | EPIPL_MOUSE | Eppk1     | Epiplakin                                                    | 0,0594456 | -0,0648064 |
| 2393 | SGPL1_MOUSE | Sgpl1     | Sphingosine-1-phosphate lyase 1                              | 0,171112  | -0,103637  |
| 2394 | AL1L1_MOUSE | Aldh1l1   | Cytosolic 10-formyltetrahydrofolate dehydrogenase            | 1,03181   | -0,482765  |
| 2395 | S2542_MOUSE | Sic25a42  | Mitochondrial coenzyme A transporter SLC25A42                | 0,77439   | -0,836637  |
| 2396 | SIR3_MOUSE  | Sirt3     | NAD-dependent protein deacetylase sirtuin-3                  | 0,56477   | -0,416286  |
| 2397 | VP37C_MOUSE | Vps37c    | Vacuolar protein sorting-associated protein 37C              | 1,55406   | 1,30255    |
| 2398 | ZPI_MOUSE   | Serpina10 | Protein Z-dependent protease inhibitor                       | 0,974177  | 0,64309    |
| 2399 | FAD1_MOUSE  | Flad1     | FAD synthase                                                 | 0,19597   | 0,147488   |
| 2400 | APEH_MOUSE  | Apeh      | Acylamino-acid-releasing enzyme                              | 1,26705   | 0,321299   |
| 2401 | ZNFX1_MOUSE | Znfx1     | NFX1-type zinc finger-containing protein 1                   | 0,528684  | 0,465396   |
| 2402 | BPHL_MOUSE  | Bphl      | Valacyclovir hydrolase                                       | 0,425576  | -0,209149  |
| 2403 | ERO1A_MOUSE | Ero1a     | ERO1-like protein alpha                                      | 1,23236   | 0,374232   |
| 2404 | EIF3C_MOUSE | Eif3c     | Eukaryotic translation initiation factor 3 subunit C         | 0,879977  | 0,262938   |
| 2405 | NIBA2_MOUSE | Niban2    | Protein Niban 2                                              | 0,130746  | 0,05975    |
| 2406 | CMBL_MOUSE  | Cmb1      | Carboxymethylenebutenolidase homolog                         | 0,777908  | -0,289364  |
| 2407 | HOP_MOUSE   | Hopx      | Homeodomain-only protein                                     | 0,0588385 | -0,0545067 |
| 2408 | AT2L2_MOUSE | Phykpl    | 5-phosphohydroxy-L-lysine phospho-lyase                      | 0,0702877 | -0,0977142 |
| 2409 | DC1L1_MOUSE | Dync1li1  | Cytoplasmic dynein 1 light intermediate chain 1              | 0,580419  | 0,612464   |
| 2410 | RBSK_MOUSE  | Rbks      | Ribokinase                                                   | 0,565761  | -0,962407  |
| 2411 | STAR7_MOUSE | Stard7    | StAR-related lipid transfer protein 7, mitochondrial         | 0,8079    | 0,646783   |
| 2412 | COQ6_MOUSE  | Coq6      | Ubiquinone biosynthesis monooxygenase COQ6, mitochondrial    | 0,820015  | 0,319381   |
| 2413 | MTSS1_MOUSE | Mtss1     | Protein MTSS 1                                               | 0,124529  | -0,0606293 |
| 2414 | CHMP7_MOUSE | Chmp7     | Charged multivesicular body protein 7                        | 0,0222739 | 0,0402981  |
| 2415 | COG4_MOUSE  | Cog4      | Conserved oligomeric Golgi complex subunit 4                 | 0,0381951 | -0,0199543 |
| 2416 | SPART_MOUSE | Spart     | Spartin                                                      | 0,208366  | 0,116639   |
| 2417 | SDSL_MOUSE  | Sdsl      | Serine dehydratase-like                                      | 1,3925    | 0,425613   |
| 2418 | FUCM_MOUSE  | Fuom      | Fucose mutarotase                                            | 0,753318  | 0,309055   |
| 2419 | TDIF2_MOUSE | Dnttp2    | Deoxynucleotidyltransferase terminal-interacting protein 2   | 0,372714  | 0,961446   |
| 2420 | UTP4_MOUSE  | Utp4      | U3 small nucleolar RNA-associated protein 4 homolog          | 0,32733   | 0,307082   |
| 2421 | KLH25_MOUSE | Klhl25    | Kelch-like protein 25                                        | 0,672999  | 0,691129   |
| 2422 | RRF2M_MOUSE | Gfm2      | Ribosome-releasing factor 2, mitochondrial                   | 0,250973  | 0,094125   |
| 2423 | BST2_MOUSE  | Bst2      | Bone marrow stromal antigen 2                                | 1,65107   | 0,551996   |
| 2424 | TF3C5_MOUSE | Gtf3c5    | General transcription factor 3C polypeptide 5                | 0,706041  | 0,335872   |
| 2425 | SEH1_MOUSE  | Seh1      | Nucleoporin SEH1                                             | 1,23409   | 0,324043   |
| 2426 | ADAP2_MOUSE | Adap2     | Arf-GAP with dual PH domain-containing protein 2             | 1,19171   | 1,18306    |
| 2427 | ABHD6_MOUSE | Abhd6     | Monoacylglycerol lipase ABHD6                                | 0,816487  | 0,402427   |
| 2428 | PTH2_MOUSE  | Pthr2     | Peptidyl-tRNA hydrolase 2, mitochondrial                     | 0,59508   | 0,387357   |
| 2429 | VPS18_MOUSE | Vps18     | Vacuolar protein sorting-associated protein 18 homolog       | 0,186276  | 0,236515   |
| 2430 | UBQL1_MOUSE | Ubqln1    | Ubiquilin-1                                                  | 1,50225   | 0,651954   |
| 2431 | RFC3_MOUSE  | Rfc3      | Replication factor C subunit 3                               | 0,691983  | 0,162698   |
| 2432 | PSPC1_MOUSE | Pspc1     | Paraspeckle component 1                                      | 0,427309  | -0,310673  |
| 2433 | IGSF8_MOUSE | Igsf8     | Immunoglobulin superfamily member 8                          | 2,13504   | 1,19603    |
| 2434 | MCMBP_MOUSE | Mcmbp     | Mini-chromosome maintenance complex-binding protein          | 1,05447   | 0,510612   |
| 2435 | TBC13_MOUSE | Tbc1d13   | TBC1 domain family member 13                                 | 0,420815  | 0,564876   |
| 2436 | FABD_MOUSE  | Mcat      | Malonyl-CoA-acyl carrier protein transacylase, mitochondrial | 0,367421  | 0,131073   |
| 2437 | STPAP_MOUSE | Tut1      | Speckle targeted PIP5K1A-regulated poly(A) polymerase        | 1,04742   | 0,582838   |
| 2438 | TCF25_MOUSE | Tcf25     | Transcription factor 25                                      | 1,0012    | 0,403698   |
| 2439 | THOC1_MOUSE | Thoc1     | THO complex subunit 1                                        | 0,265724  | -0,231859  |

|      |             |          |                                                                       |           |           |
|------|-------------|----------|-----------------------------------------------------------------------|-----------|-----------|
| 2440 | SARAF_MOUSE | Saraf    | Store-operated calcium entry-associated regulatory factor             | 1,28415   | 1,02309   |
| 2441 | CCD58_MOUSE | Ccdc58   | Coiled-coil domain-containing protein 58                              | 0,818132  | 0,490457  |
| 2442 | EXOC1_MOUSE | Exoc1    | Exocyst complex component 1                                           | 0,0510443 | 0,021423  |
| 2443 | SHLB2_MOUSE | Sh3glb2  | Endophilin-B2                                                         | 0,769855  | 0,306007  |
| 2444 | MIC13_MOUSE | Micos13  | MICOS complex subunit MIC13                                           | 1,18672   | -0,800729 |
| 2445 | DICER_MOUSE | Dicer1   | Endoribonuclease Dicer                                                | 0,0624754 | 0,0744442 |
| 2446 | SL9A8_MOUSE | Slc9a8   | Sodium/hydrogen exchanger 8                                           | 0,170339  | 0,384343  |
| 2447 | ARHGC_MOUSE | Arhgef12 | Rho guanine nucleotide exchange factor 12                             | 0,746985  | 0,217188  |
| 2448 | NAGS_MOUSE  | Nags     | N-acetylglutamate synthase, mitochondrial                             | 1,02268   | -0,620471 |
| 2449 | IRAK4_MOUSE | Irak4    | Interleukin-1 receptor-associated kinase 4                            | 1,01835   | 0,557961  |
| 2450 | CLYBL_MOUSE | Clybl    | Citramalyl-CoA lyase, mitochondrial                                   | 0,81047   | 0,245842  |
| 2451 | STAB2_MOUSE | Stab2    | Stabilin-2                                                            | 0,938426  | -0,344761 |
| 2452 | LUZP1_MOUSE | Luzp1    | Leucine zipper protein 1                                              | 0,383608  | 0,266946  |
| 2453 | RBM12_MOUSE | Rbm12    | RNA-binding protein 12                                                | 0,517824  | 0,23719   |
| 2454 | STAB1_MOUSE | Stab1    | Stabilin-1                                                            | 1,33962   | 0,436449  |
| 2455 | ACMSD_MOUSE | Acmsd    | 2-amino-3-carboxymuconate-6-semialdehyde decarboxylase                | 0,924231  | -1,27917  |
| 2456 | SNP47_MOUSE | Snap47   | Synaptosomal-associated protein 47                                    | 0,891165  | 0,51649   |
| 2457 | KPRB_MOUSE  | Prpsap2  | Phosphoribosyl pyrophosphate synthase-associated protein 2            | 0,714729  | -0,947857 |
| 2458 | TB22A_MOUSE | Tbc1d22a | TBC1 domain family member 22A                                         | 0,912085  | 0,543238  |
| 2459 | IFIH1_MOUSE | Ifih1    | Interferon-induced helicase C domain-containing protein 1             | 0,860085  | 0,380124  |
| 2460 | ARAP3_MOUSE | Arap3    | Arf-GAP with Rho-GAP domain, ANK repeat and PH domain-containing prot | 0,0823026 | 0,0485687 |
| 2461 | UBP15_MOUSE | Usp15    | Ubiquitin carboxyl-terminal hydrolase 15                              | 0,281143  | 0,128508  |
| 2462 | VPS39_MOUSE | Vps39    | Vam6/Vps39-like protein                                               | 0,153199  | -0,103736 |
| 2463 | SDHL_MOUSE  | Sds      | L-serine dehydratase/L-threonine deaminase                            | 2,08876   | -0,691093 |
| 2464 | ASPC1_MOUSE | Aspscr1  | Tether containing UBX domain for GLUT4                                | 0,147028  | 0,0721699 |
| 2465 | EXOS2_MOUSE | Exosc2   | Exosome complex component RRP4                                        | 0,166047  | 0,0828339 |
| 2466 | CSN8_MOUSE  | Cops8    | COP9 signalosome complex subunit 8                                    | 1,70871   | 0,369133  |
| 2467 | ULA1_MOUSE  | Nae1     | NEDD8-activating enzyme E1 regulatory subunit                         | 1,03788   | 0,23172   |
| 2468 | TTC36_MOUSE | Ttc36    | Tetratricopeptide repeat protein 36                                   | 0,684489  | -0,297829 |
| 2469 | MPDZ_MOUSE  | Mpdz     | Multiple PDZ domain protein                                           | 0,494386  | -0,157659 |
| 2470 | CLPT1_MOUSE | Ciptm1   | Cleft lip and palate transmembrane protein 1 homolog                  | 0,765647  | 1,19712   |
| 2471 | EMAL3_MOUSE | Emi3     | Echinoderm microtubule-associated protein-like 3                      | 1,08521   | 0,479685  |
| 2472 | HUTU_MOUSE  | Uroc1    | Urocanate hydratase                                                   | 1,01211   | -0,434105 |
| 2473 | HEM1_MOUSE  | Alas1    | 5-aminolevulinat synthase, nonspecific, mitochondrial                 | 0,126787  | -0,218998 |
| 2474 | AK1CD_MOUSE | Akr1c13  | Aldo-keto reductase family 1 member C13                               | 1,29395   | 0,93795   |
| 2475 | TKFC_MOUSE  | Tkfc     | Triokinase/FMN cyclase                                                | 1,1622    | 0,49165   |
| 2476 | RBPS2_MOUSE | Rbpms2   | RNA-binding protein with multiple splicing 2                          | 0,293595  | 0,184301  |
| 2477 | LSM1_MOUSE  | Lsm1     | U6 snRNA-associated Sm-like protein LSM1                              | 0,377793  | 0,238498  |
| 2478 | BUP1_MOUSE  | Upb1     | Beta-ureidopropionase                                                 | 0,420833  | -0,30618  |
| 2479 | SCRN2_MOUSE | Scrn2    | Secernin-2                                                            | 0,427597  | -0,246593 |
| 2480 | GYS2_MOUSE  | Gys2     | Glycogen [starch] synthase, liver                                     | 0,921689  | 0,564425  |
| 2481 | PGDH_MOUSE  | Hpgd     | 15-hydroxyprostaglandin dehydrogenase [NAD(+)]                        | 0,483111  | 0,504661  |
| 2482 | EST1_MOUSE  | Ces1     | Liver carboxylesterase 1                                              | 0,610848  | 0,669921  |
| 2483 | MAVS_MOUSE  | Mavs     | Mitochondrial antiviral-signaling protein                             | 1,35048   | 0,51767   |
| 2484 | CO8G_MOUSE  | C8g      | Complement component C8 gamma chain                                   | 0,956701  | 0,521858  |
| 2485 | THIKB_MOUSE | Acaa1b   | 3-ketoacyl-CoA thiolase B, peroxisomal                                | 0,529039  | 0,43096   |
| 2486 | DHC24_MOUSE | Dhcr24   | Delta(24)-sterol reductase                                            | 0,310444  | -0,275337 |
| 2487 | RDH10_MOUSE | Rdh10    | Retinol dehydrogenase 10                                              | 0,380613  | 0,431774  |
| 2488 | UBXN4_MOUSE | Ubxn4    | UBX domain-containing protein 4                                       | 1,62776   | 0,514595  |
| 2489 | PLBL1_MOUSE | Plbd1    | Phospholipase B-like 1                                                | 0,806651  | 1,80227   |
| 2490 | PEX19_MOUSE | Pex19    | Peroxisomal biogenesis factor 19                                      | 0,0609609 | 0,0430687 |
| 2491 | SCO2_MOUSE  | Sco2     | Protein SCO2 homolog, mitochondrial                                   | 0,741406  | 0,424934  |

|      |             |          |                                                           |            |             |
|------|-------------|----------|-----------------------------------------------------------|------------|-------------|
| 2492 | ZFY21_MOUSE | Zfyve21  | Zinc finger FYVE domain-containing protein 21             | 1,73567    | 0,576432    |
| 2493 | FIBG_MOUSE  | Fgg      | Fibrinogen gamma chain                                    | 1,27339    | 0,468082    |
| 2494 | NCLN_MOUSE  | Ncln     | Nicalin                                                   | 0,0805635  | 0,0587383   |
| 2495 | CGL_MOUSE   | Cth      | Cystathionine gamma-lyase                                 | 1,14251    | -0,365092   |
| 2496 | TBCC_MOUSE  | Tbcc     | Tubulin-specific chaperone C                              | 0,795435   | 0,413832    |
| 2497 | DHB13_MOUSE | Hsd17b13 | 17-beta-hydroxysteroid dehydrogenase 13                   | 0,0277495  | 0,022411    |
| 2498 | ABHEB_MOUSE | Abhd14b  | Protein ABHD14B                                           | 0,525322   | -0,366351   |
| 2499 | AMPB_MOUSE  | Rnpep    | Aminopeptidase B                                          | 0,17606    | 0,116216    |
| 2500 | CES1D_MOUSE | Ces1d    | Carboxylesterase 1D                                       | 2,27391    | 0,636515    |
| 2501 | EST3B_MOUSE | Ces3b    | Carboxylesterase 3B                                       | 0,364491   | 0,339634    |
| 2502 | ACSF2_MOUSE | Acsf2    | Medium-chain acyl-CoA ligase ACSF2, mitochondrial         | 0,905998   | 0,398207    |
| 2503 | AK1D1_MOUSE | Akr1d1   | Aldo-keto reductase family 1 member D1                    | 0,946541   | 0,518213    |
| 2504 | MICU1_MOUSE | Micu1    | Calcium uptake protein 1, mitochondrial                   | 0,674603   | -0,266479   |
| 2505 | HYPDH_MOUSE | Prodh2   | Hydroxyproline dehydrogenase                              | 0,0484131  | 0,0352242   |
| 2506 | GRAP1_MOUSE | Gripap1  | GRIP1-associated protein 1                                | 0,616599   | 0,632663    |
| 2507 | TPSNR_MOUSE | Tapbp1   | Tapasin-related protein                                   | 1,45924    | 0,896941    |
| 2508 | PI3R4_MOUSE | Pik3r4   | Phosphoinositide 3-kinase regulatory subunit 4            | 0,177782   | -0,145318   |
| 2509 | HIP1_MOUSE  | Hip1     | Huntingtin-interacting protein 1                          | 0,380072   | 0,437148    |
| 2510 | SYLM_MOUSE  | Lars2    | Probable leucine--tRNA ligase, mitochondrial              | 0,952566   | 0,310462    |
| 2511 | FYCO1_MOUSE | Fyco1    | FYVE and coiled-coil domain-containing protein 1          | 0,490472   | 0,244593    |
| 2512 | MYH9_MOUSE  | Myh9     | Myosin-9                                                  | 1,12054    | 0,246971    |
| 2513 | WASH1_MOUSE | Washc1   | WASH complex subunit 1                                    | 0,108992   | 0,228916    |
| 2514 | PARN_MOUSE  | Parn     | Poly(A)-specific ribonuclease PARN                        | 0,441088   | 0,339016    |
| 2515 | PPCS_MOUSE  | Ppcs     | Phosphopantothenate--cysteine ligase                      | 0,628703   | 0,203228    |
| 2516 | PAFA2_MOUSE | Pafah2   | Platelet-activating factor acetylhydrolase 2, cytoplasmic | 0,101338   | -0,108379   |
| 2517 | UBAC1_MOUSE | Ubac1    | Ubiquitin-associated domain-containing protein 1          | 0,57082    | 0,668       |
| 2518 | VIGLN_MOUSE | Hdlbp    | Vigilin                                                   | 1,24347    | 0,367297    |
| 2519 | NIT1_MOUSE  | Nit1     | Deaminated glutathione amidase                            | 0,686064   | 0,348441    |
| 2520 | ADPGK_MOUSE | Adpgk    | ADP-dependent glucokinase                                 | 0,096241   | -0,0627144  |
| 2521 | PSMD2_MOUSE | Psm2     | 26S proteasome non-ATPase regulatory subunit 2            | 0,754386   | 0,533445    |
| 2522 | HNRL1_MOUSE | Hnmpul1  | Heterogeneous nuclear ribonucleoprotein U-like protein 1  | 0,674439   | 0,260379    |
| 2523 | AT1A1_MOUSE | Atp1a1   | Sodium/potassium-transporting ATPase subunit alpha-1      | 0,895865   | 0,501267    |
| 2524 | CCAR2_MOUSE | Ccar2    | Cell cycle and apoptosis regulator protein 2              | 0,0467103  | -0,0150539  |
| 2525 | PTGR2_MOUSE | Ptgr2    | Prostaglandin reductase 2                                 | 0,177654   | 0,174299    |
| 2526 | SIR2_MOUSE  | Sirt2    | NAD-dependent protein deacetylase sirtuin-2               | 0,875344   | 0,402098    |
| 2527 | DX39A_MOUSE | Ddx39a   | ATP-dependent RNA helicase DDX39A                         | 0,129727   | -0,0815323  |
| 2528 | ZDHC5_MOUSE | Zdhc5    | Palmitoyltransferase ZDHC5                                | 0,741998   | -0,533876   |
| 2529 | TT39C_MOUSE | Ttc39c   | Tetrapeptide repeat protein 39C                           | 1,0506     | -0,706739   |
| 2530 | MTMR6_MOUSE | Mtmr6    | Myotubularin-related protein 6                            | 0,526951   | 0,428562    |
| 2531 | MIQ_MOUSE   | Mios     | GATOR complex protein MIOS                                | 0,776285   | 0,799179    |
| 2532 | RT23_MOUSE  | Mrps23   | 28S ribosomal protein S23, mitochondrial                  | 0,472206   | -0,157175   |
| 2533 | OXND1_MOUSE | Oxnad1   | Oxidoreductase NAD-binding domain-containing protein 1    | 0,482323   | 0,260027    |
| 2534 | UBA5_MOUSE  | Uba5     | Ubiquitin-like modifier-activating enzyme 5               | 0,0496988  | -0,0350403  |
| 2535 | PDC10_MOUSE | Pdcd10   | Programmed cell death protein 10                          | 1,07827    | 0,365322    |
| 2536 | THOC3_MOUSE | Thoc3    | THO complex subunit 3                                     | 1,06578    | -1,12698    |
| 2537 | F1142_MOUSE | Fam114a2 | Protein FAM114A2                                          | 0,308369   | -0,25502    |
| 2538 | CH082_MOUSE |          | UPF0598 protein C8orf82 homolog                           | 1,01192    | 0,520398    |
| 2539 | SRSF4_MOUSE | Srsf4    | Serine/arginine-rich splicing factor 4                    | 0,00023647 | 0,000141907 |
| 2540 | CC115_MOUSE | Ccdc115  | Coiled-coil domain-containing protein 115                 | 1,40212    | 0,814216    |
| 2541 | RPE_MOUSE   | Rpe      | Ribulose-phosphate 3-epimerase                            | 1,29091    | 0,466713    |
| 2542 | RFA1_MOUSE  | Rpa1     | Replication protein A 70 kDa DNA-binding subunit          | 0,263661   | 0,0773335   |
| 2543 | EPMIP_MOUSE | Epm2aip1 | EPM2A-interacting protein 1                               | 0,933305   | 0,283509    |



|      |             |          |                                                              |           |            |
|------|-------------|----------|--------------------------------------------------------------|-----------|------------|
| 2544 | ERLEC_MOUSE | Erlec1   | Endoplasmic reticulum lectin 1                               | 0,904024  | 0,518328   |
| 2545 | VPS4A_MOUSE | Vps4a    | Vacuolar protein sorting-associated protein 4A               | 1,25976   | 1,5627     |
| 2546 | CC50A_MOUSE | Tmem30a  | Cell cycle control protein 50A                               | 0,287553  | 0,405759   |
| 2547 | HNRPU_MOUSE | Hnmpu    | Heterogeneous nuclear ribonucleoprotein U                    | 0,126052  | -0,0417854 |
| 2548 | MPCP_MOUSE  | Slc25a3  | Phosphate carrier protein, mitochondrial                     | 0,158218  | -0,0722668 |
| 2549 | RBM39_MOUSE | Rbm39    | RNA-binding protein 39                                       | 0,293606  | 0,133378   |
| 2550 | SEC63_MOUSE | Sec63    | Translocation protein SEC63 homolog                          | 0,219226  | 0,210364   |
| 2551 | FMO4_MOUSE  | Fmo4     | Dimethylaniline monooxygenase [N-oxide-forming] 4            | 0,17436   | -0,0780811 |
| 2552 | CSK12_MOUSE | Caskin2  | Caskin-2                                                     | 0,978538  | 0,437104   |
| 2553 | DHX36_MOUSE | Dhx36    | ATP-dependent DNA/RNA helicase DHX36                         | 0,577367  | 0,234082   |
| 2554 | P66B_MOUSE  | Gatad2b  | Transcriptional repressor p66-beta                           | 0,622735  | 0,552022   |
| 2555 | IMP4_MOUSE  | Imp4     | U3 small nucleolar ribonucleoprotein protein IMP4            | 0,84852   | 0,282764   |
| 2556 | TAF9_MOUSE  | Taf9     | Transcription initiation factor TFIID subunit 9              | 0,543549  | 0,184852   |
| 2557 | PAX1_MOUSE  | Pxn      | Paxillin                                                     | 0,0529859 | 0,112864   |
| 2558 | MRP2_MOUSE  | Abcc2    | Canalicular multispecific organic anion transporter 1        | 0,839976  | -0,3065    |
| 2559 | MOB2_MOUSE  | Mob2     | MOB kinase activator 2                                       | 0,854607  | -0,553864  |
| 2560 | IPO4_MOUSE  | Ipo4     | Importin-4                                                   | 0,150086  | -0,18523   |
| 2561 | SFPQ_MOUSE  | Sfpq     | Splicing factor, proline- and glutamine-rich                 | 0,262263  | 0,158797   |
| 2562 | IRGQ_MOUSE  | Irgq     | Immunity-related GTPase family Q protein                     | 1,32128   | 0,75084    |
| 2563 | CS012_MOUSE |          | Protein C19orf12 homolog                                     | 1,60736   | 0,760803   |
| 2564 | WDR13_MOUSE | Wdr13    | WD repeat-containing protein 13                              | 1,1339    | 0,289058   |
| 2565 | BACH_MOUSE  | Aco7     | Cytosolic acyl coenzyme A thioester hydrolase                | 0,543562  | 0,218751   |
| 2566 | ETFR1_MOUSE | Etfr1    | Electron transfer flavoprotein regulatory factor 1           | 0,0429006 | 0,0139027  |
| 2567 | RAB14_MOUSE | Rab14    | Ras-related protein Rab-14                                   | 0,330277  | -0,262545  |
| 2568 | ISOC1_MOUSE | Isoc1    | Isochorismatase domain-containing protein 1                  | 0,52178   | -0,31817   |
| 2569 | CK054_MOUSE |          | Ester hydrolase C11orf54 homolog                             | 0,484528  | 0,226688   |
| 2570 | ACLY_MOUSE  | Acly     | ATP-citrate synthase                                         | 0,26655   | 0,385088   |
| 2571 | ACSM1_MOUSE | Acsm1    | Acyl-coenzyme A synthetase ACSM1, mitochondrial              | 0,456292  | 0,335358   |
| 2572 | PDIP2_MOUSE | Poldip2  | Polymerase delta-interacting protein 2                       | 1,21506   | 0,326056   |
| 2573 | IF4A3_MOUSE | Eif4a3   | Eukaryotic initiation factor 4A-III                          | 0,137374  | -0,148732  |
| 2574 | PLVAP_MOUSE | Plvap    | Plasmalemma vesicle-associated protein                       | 0,857903  | 0,331691   |
| 2575 | NDUS1_MOUSE | Ndufs1   | NADH-ubiquinone oxidoreductase 75 kDa subunit, mitochondrial | 0,407328  | -0,175261  |
| 2576 | S27A4_MOUSE | Slc27a4  | Long-chain fatty acid transport protein 4                    | 1,47565   | 0,464725   |
| 2577 | HNMT_MOUSE  | Hnmt     | Histamine N-methyltransferase                                | 0,844925  | -0,333252  |
| 2578 | SNX9_MOUSE  | Snx9     | Sorting nexin-9                                              | 0,0741329 | 0,0662716  |
| 2579 | MEMO1_MOUSE | Memo1    | Protein MEMO1                                                | 0,102492  | 0,0331066  |
| 2580 | RINI_MOUSE  | Rnh1     | Ribonuclease inhibitor                                       | 0,659046  | 0,276203   |
| 2581 | STK38_MOUSE | Stk38    | Serine/threonine-protein kinase 38                           | 0,373453  | 0,241252   |
| 2582 | RMXL1_MOUSE | Rbmxl1   | RNA binding motif protein, X-linked-like-1                   | 0,741868  | 0,214381   |
| 2583 | IPYR2_MOUSE | Ppa2     | Inorganic pyrophosphatase 2, mitochondrial                   | 0,135752  | -0,0875854 |
| 2584 | MIC25_MOUSE | Chchd6   | MICOS complex subunit Mic25                                  | 1,97094   | 1,33476    |
| 2585 | DDX41_MOUSE | Ddx41    | Probable ATP-dependent RNA helicase DDX41                    | 0,747176  | 0,317782   |
| 2586 | ATPG_MOUSE  | Atp5f1c  | ATP synthase subunit gamma, mitochondrial                    | 0,273575  | -0,2804    |
| 2587 | DDX1_MOUSE  | Ddx1     | ATP-dependent RNA helicase DDX1                              | 0,688906  | 0,305557   |
| 2588 | BRK1_MOUSE  | Brk1     | Protein BRICK1                                               | 0,456254  | 0,344436   |
| 2589 | MGST1_MOUSE | Mgst1    | Microsomal glutathione S-transferase 1                       | 0,961835  | -0,916946  |
| 2590 | FARP2_MOUSE | Farp2    | FERM, ARHGEF and pleckstrin domain-containing protein 2      | 0,45115   | -0,271994  |
| 2591 | CBR4_MOUSE  | Cbr4     | Carbonyl reductase family member 4                           | 0,0558616 | -0,0300091 |
| 2592 | DCA11_MOUSE | Dcaf11   | DDB1- and CUL4-associated factor 11                          | 0,0580171 | 0,0449398  |
| 2593 | PUS7_MOUSE  | Pus7     | Pseudouridylate synthase 7 homolog                           | 0,43919   | 0,39599    |
| 2594 | SH3L3_MOUSE | Sh3bgrl3 | SH3 domain-binding glutamic acid-rich-like protein 3         | 1,62944   | 0,596616   |
| 2595 | GOGA4_MOUSE | Golga4   | Golgin subfamily A member 4                                  | 0,718681  | 0,627876   |

|      |             |           |                                                                                              |           |             |
|------|-------------|-----------|----------------------------------------------------------------------------------------------|-----------|-------------|
| 2596 | UBAP2_MOUSE | Ubp2      | Ubiquitin-associated protein 2                                                               | 1,55966   | 0,682561    |
| 2597 | NCOA5_MOUSE | Ncoa5     | Nuclear receptor coactivator 5                                                               | 0,200341  | 0,172465    |
| 2598 | GCSP_MOUSE  | Gldc      | Glycine dehydrogenase (decarboxylating), mitochondrial                                       | 0,212467  | 0,110819    |
| 2599 | CSDE1_MOUSE | Csde1     | Cold shock domain-containing protein E1                                                      | 0,788361  | 0,327848    |
| 2600 | RBMS1_MOUSE | Rbms1     | RNA-binding motif, single-stranded-interacting protein 1                                     | 0,318813  | -0,175108   |
| 2601 | FXL15_MOUSE | Fbxl15    | F-box/LRR-repeat protein 15                                                                  | 1,78859   | 1,01294     |
| 2602 | CP270_MOUSE | Cyp2c70   | Cytochrome P450 2C70                                                                         | 0,548954  | -0,516256   |
| 2603 | UBL7_MOUSE  | Ubl7      | Ubiquitin-like protein 7                                                                     | 1,94743   | 1,40352     |
| 2604 | VPS11_MOUSE | Vps11     | Vacuolar protein sorting-associated protein 11 homolog                                       | 1,11655   | 0,431472    |
| 2605 | MA2C1_MOUSE | Man2c1    | Alpha-mannosidase 2C1                                                                        | 0,272137  | -0,0880699  |
| 2606 | TXND5_MOUSE | Txndc5    | Thioredoxin domain-containing protein 5                                                      | 0,379457  | 0,21848     |
| 2607 | SETD3_MOUSE | Setd3     | Actin-histidine N-methyltransferase                                                          | 0,0357002 | -0,0340481  |
| 2608 | NDUS2_MOUSE | Ndufs2    | NADH dehydrogenase [ubiquinone] iron-sulfur protein 2, mitochondrial                         | 0,511105  | -0,324656   |
| 2609 | SNX15_MOUSE | Snx15     | Sorting nexin-15                                                                             | 0,139654  | 0,0886837   |
| 2610 | EST2C_MOUSE | Ces2c     | Acylcarnitine hydrolase                                                                      | 0,981203  | 0,454869    |
| 2611 | RABE2_MOUSE | Rabep2    | Rab GTPase-binding effector protein 2                                                        | 1,12216   | 0,518084    |
| 2612 | ELP2_MOUSE  | Elp2      | Elongator complex protein 2                                                                  | 0,519628  | 0,323453    |
| 2613 | GLCNE_MOUSE | Gne       | Bifunctional UDP-N-acetylglucosamine 2-epimerase/N-acetylmannosamine 6-phosphate 4-epimerase | 0,264594  | -0,129296   |
| 2614 | SPS2L_MOUSE | Spats2l   | SPATS2-like protein                                                                          | 0,867443  | 0,517479    |
| 2615 | FUBP1_MOUSE | Fubp1     | Far upstream element-binding protein 1                                                       | 1,28569   | 0,619849    |
| 2616 | SPRY4_MOUSE | Spryd4    | SPRY domain-containing protein 4                                                             | 0,766403  | -0,278342   |
| 2617 | EIF3H_MOUSE | Eif3h     | Eukaryotic translation initiation factor 3 subunit H                                         | 0,277761  | -0,173653   |
| 2618 | GCSH_MOUSE  | Gcsh      | Glycine cleavage system H protein, mitochondrial                                             | 0,526129  | -1,30287    |
| 2619 | WWOX_MOUSE  | Wwox      | WW domain-containing oxidoreductase                                                          | 0,906075  | 1,3791      |
| 2620 | STRBP_MOUSE | Strbp     | Spermatid perinuclear RNA-binding protein                                                    | 1,45295   | 1,88639     |
| 2621 | HDHD5_MOUSE | Hdhd5     | Haloacid dehalogenase-like hydrolase domain-containing 5                                     | 0,0606253 | -0,0278984  |
| 2622 | KMO_MOUSE   | Kmo       | Kynurenine 3-monooxygenase                                                                   | 0,0208302 | -0,00903587 |
| 2623 | MASP2_MOUSE | Masp2     | Mannan-binding lectin serine protease 2                                                      | 0,0809048 | 0,0841473   |
| 2624 | SPA3N_MOUSE | Serpina3n | Serine protease inhibitor A3N                                                                | 0,033859  | -0,0252548  |
| 2625 | SYYC_MOUSE  | Yars      | Tyrosine--tRNA ligase, cytoplasmic                                                           | 1,21441   | 0,304842    |
| 2626 | ASCC2_MOUSE | Ascc2     | Activating signal cointegrator 1 complex subunit 2                                           | 0,384403  | -0,485122   |
| 2627 | CISD1_MOUSE | Cisd1     | CDGSH iron-sulfur domain-containing protein 1                                                | 1,41649   | -0,4321     |
| 2628 | BHMT2_MOUSE | Bhmt2     | S-methylmethionine--homocysteine S-methyltransferase BHMT2                                   | 0,969247  | -1,90786    |
| 2629 | RBM47_MOUSE | Rbm47     | RNA-binding protein 47                                                                       | 0,4859    | -0,314677   |
| 2630 | CBS_MOUSE   | Cbs       | Cystathionine beta-synthase                                                                  | 0,851602  | 0,278531    |
| 2631 | CES1F_MOUSE | Ces1f     | Carboxylesterase 1F                                                                          | 1,50471   | 1,97619     |
| 2632 | AS3MT_MOUSE | As3mt     | Arsenite methyltransferase                                                                   | 0,19653   | 0,0727322   |
| 2633 | NC2B_MOUSE  | Dr1       | Protein Dr1                                                                                  | 0,646323  | 1,01274     |
| 2634 | DTBP1_MOUSE | Dtnbp1    | Dysbindin                                                                                    | 2,28742   | 1,4447      |
| 2635 | BAAT_MOUSE  | Baat      | Bile acid-CoA:amino acid N-acyltransferase                                                   | 0,840781  | 0,443671    |
| 2636 | GCKR_MOUSE  | Gckr      | Glucokinase regulatory protein                                                               | 0,280469  | -0,112549   |
| 2637 | DCXR_MOUSE  | Dcxr      | L-xylulose reductase                                                                         | 0,0258191 | 0,0150993   |
| 2638 | ZFN2B_MOUSE | Zfand2b   | AN1-type zinc finger protein 2B                                                              | 0,0714848 | 0,117928    |
| 2639 | HEMO_MOUSE  | Hpx       | Hemopexin                                                                                    | 0,0110715 | 0,0130058   |
| 2640 | CY250_MOUSE | Cyp2c50   | Cytochrome P450 2C50                                                                         | 0,589744  | -1,09634    |
| 2641 | ERLN1_MOUSE | Erlin1    | Erlin-1                                                                                      | 0,0708215 | -0,0632065  |
| 2642 | METK1_MOUSE | Mat1a     | S-adenosylmethionine synthase isoform type-1                                                 | 0,744329  | -0,291088   |
| 2643 | NADC_MOUSE  | Qprt      | Nicotinate-nucleotide pyrophosphorylase [carboxylating]                                      | 0,169835  | -0,371723   |
| 2644 | DAP1_MOUSE  | Dap       | Death-associated protein 1                                                                   | 0,0974345 | -0,0424065  |
| 2645 | PEX16_MOUSE | Pex16     | Peroxisomal membrane protein PEX16                                                           | 0,367369  | 0,19581     |
| 2646 | FTCD_MOUSE  | Ftcd      | Formimidoyltransferase-cyclodeaminase                                                        | 0,0664522 | -0,0251957  |
| 2647 | VPS36_MOUSE | Vps36     | Vacuolar protein-sorting-associated protein 36                                               | 0,534074  | 0,325278    |

|      |             |           |                                                                          |            |             |
|------|-------------|-----------|--------------------------------------------------------------------------|------------|-------------|
| 2648 | CREL1_MOUSE | Creld1    | Cysteine-rich with EGF-like domain protein 1                             | 0,673148   | 0,279463    |
| 2649 | GLYAT_MOUSE | Glyat     | Glycine N-acyltransferase                                                | 1,06184    | 0,550508    |
| 2650 | ACY3_MOUSE  | Acy3      | N-acyl-aromatic-L-amino acid amidohydrolase (carboxylate-forming)        | 0,112419   | 0,101366    |
| 2651 | PNPO_MOUSE  | Pnpo      | Pyridoxine-5'-phosphate oxidase                                          | 0,763185   | 0,220422    |
| 2652 | DUS3L_MOUSE | Dus3l     | tRNA-dihydrouridine(47) synthase [NAD(P)(+)]-like                        | 1,10045    | 1,43971     |
| 2653 | OSBL1_MOUSE | Osbpl1a   | Oxysterol-binding protein-related protein 1                              | 0,181717   | -0,145142   |
| 2654 | SC16B_MOUSE | Sec16b    | Protein transport protein Sec16B                                         | 0,0200761  | 0,0132717   |
| 2655 | WRIP1_MOUSE | Wrnip1    | ATPase WRNIP1                                                            | 0,617117   | 0,464342    |
| 2656 | FA11_MOUSE  | F11       | Coagulation factor XI                                                    | 0,454817   | 0,325359    |
| 2657 | MK08_MOUSE  | Mapk8     | Mitogen-activated protein kinase 8                                       | 0,185897   | 0,13838     |
| 2658 | ALDOB_MOUSE | Aldob     | Fructose-bisphosphate aldolase B                                         | 0,951841   | -0,388822   |
| 2659 | WASL_MOUSE  | Wasl      | Neural Wiskott-Aldrich syndrome protein                                  | 0,0463136  | -0,0285915  |
| 2660 | EGLN1_MOUSE | Egln1     | Egl nine homolog 1                                                       | 0,602943   | 0,571912    |
| 2661 | IPO9_MOUSE  | Ipo9      | Importin-9                                                               | 0,507038   | -0,374035   |
| 2662 | RBM5_MOUSE  | Rbm5      | RNA-binding protein 5                                                    | 1,06697    | 0,796603    |
| 2663 | ATLA3_MOUSE | Atl3      | Atlastin-3                                                               | 0,044932   | -0,0337868  |
| 2664 | ARLY_MOUSE  | Asl       | Argininosuccinate lyase                                                  | 1,0633     | -0,314177   |
| 2665 | SNX4_MOUSE  | Snx4      | Sorting nexin-4                                                          | 1,43261    | 0,343432    |
| 2666 | THYN1_MOUSE | Thyn1     | Thymocyte nuclear protein 1                                              | 0,0437815  | 0,0206627   |
| 2667 | RHG35_MOUSE | Arhgap35  | Rho GTPase-activating protein 35                                         | 0,923123   | 0,419786    |
| 2668 | FAKD4_MOUSE | Tbrg4     | FAST kinase domain-containing protein 4                                  | 0,467686   | -0,153783   |
| 2669 | UAP1_MOUSE  | Uap1      | UDP-N-acetylhexosamine pyrophosphorylase                                 | 0,300804   | -0,120035   |
| 2670 | L2HDH_MOUSE | L2hgdh    | L-2-hydroxyglutarate dehydrogenase, mitochondrial                        | 0,454014   | 0,286063    |
| 2671 | NEUL_MOUSE  | Nln       | Neurolysin, mitochondrial                                                | 1,11563    | 0,347222    |
| 2672 | DEOC_MOUSE  | Dera      | Deoxyribose-phosphate aldolase                                           | 0,276793   | -0,118222   |
| 2673 | RPN1_MOUSE  | Rpn1      | Dolichyl-diphosphooligosaccharide--protein glycosyltransferase subunit 1 | 0,533271   | -0,298631   |
| 2674 | TWF1_MOUSE  | Twf1      | Twinfilin-1                                                              | 1,28945    | 0,427697    |
| 2675 | EFNMT_MOUSE | EEF1AKNMT | eEF1A lysine and N-terminal methyltransferase                            | 0,206001   | 0,132417    |
| 2676 | PRP6_MOUSE  | Prpf6     | Pre-mRNA-processing factor 6                                             | 0,745807   | 0,746503    |
| 2677 | PTGR1_MOUSE | Plgr1     | Prostaglandin reductase 1                                                | 0,66561    | -0,327061   |
| 2678 | NDUV1_MOUSE | Ndufv1    | NADH dehydrogenase [ubiquinone] flavoprotein 1, mitochondrial            | 0,14412    | 0,11801     |
| 2679 | SSF1_MOUSE  | Ppan      | Suppressor of SWI4 1 homolog                                             | 1,22048    | 0,614595    |
| 2680 | DNJC3_MOUSE | Dnajc3    | DnaJ homolog subfamily C member 3                                        | 1,31523    | 0,423448    |
| 2681 | LGAT1_MOUSE | Lpgat1    | Acyl-CoA:lysophosphatidylglycerol acyltransferase 1                      | 0,426573   | 0,321289    |
| 2682 | PTBP2_MOUSE | Ptbp2     | Polypyrimidine tract-binding protein 2                                   | 0,752108   | -0,547913   |
| 2683 | TTC1_MOUSE  | Ttc1      | Tetratricopeptide repeat protein 1                                       | 0,931711   | 0,587255    |
| 2684 | GRHPR_MOUSE | Grhpr     | Glyoxylate reductase/hydroxypyruvate reductase                           | 0,210627   | 0,133287    |
| 2685 | CF132_MOUSE |           | Uncharacterized protein C6orf132 homolog                                 | 0,0334987  | 0,0386322   |
| 2686 | SRGP2_MOUSE | Srgap2    | SLIT-ROBO Rho GTPase-activating protein 2                                | 0,00437576 | -0,00261688 |
| 2687 | B3GT6_MOUSE | B3galt6   | Beta-1,3-galactosyltransferase 6                                         | 1,70767    | 0,963772    |
| 2688 | PCCA_MOUSE  | Pcca      | Propionyl-CoA carboxylase alpha chain, mitochondrial                     | 1,13429    | -0,549999   |
| 2689 | TMLH_MOUSE  | Tmlhe     | Trimethyllysine dioxygenase, mitochondrial                               | 1,30501    | -0,486898   |
| 2690 | UGPA_MOUSE  | Ugp2      | UTP--glucose-1-phosphate uridylyltransferase                             | 1,09388    | -0,316174   |
| 2691 | LPIN1_MOUSE | Lpin1     | Phosphatidate phosphatase LPIN1                                          | 2,0214     | -1,7367     |
| 2692 | SNX18_MOUSE | Snx18     | Sorting nexin-18                                                         | 0,270766   | 0,212561    |
| 2693 | FGD4_MOUSE  | Fgd4      | FYVE, RhoGEF and PH domain-containing protein 4                          | 0,312747   | 0,264122    |
| 2694 | MIA2_MOUSE  | Mia2      | Melanoma inhibitory activity protein 2                                   | 0,0344065  | 0,0221672   |
| 2695 | SMCA5_MOUSE | Smarca5   | SWI/SNF-related matrix-associated actin-dependent regulator of chromatin | 0,65801    | 0,257757    |
| 2696 | LRP1_MOUSE  | Lrp1      | Prolow-density lipoprotein receptor-related protein 1                    | 0,304221   | 0,110423    |
| 2697 | RISC_MOUSE  | Scpep1    | Retinoid-inducible serine carboxypeptidase                               | 0,925911   | -0,507405   |
| 2698 | AFG31_MOUSE | Afg3l1    | AFG3-like protein 1                                                      | 0,192329   | -0,132418   |
| 2699 | SP16H_MOUSE | Supt16h   | FACT complex subunit SPT16                                               | 0,24747    | 0,0566978   |

|      |              |          |                                                                         |           |              |
|------|--------------|----------|-------------------------------------------------------------------------|-----------|--------------|
| 2700 | FPPS_MOUSE   | Fdps     | Farnesyl pyrophosphate synthase                                         | 0,430086  | -0,689444    |
| 2701 | FADS1_MOUSE  | Fads1    | Acyl-CoA (8-3)-desaturase                                               | 1,53012   | 0,733422     |
| 2702 | VPS16_MOUSE  | Vps16    | Vacuolar protein sorting-associated protein 16 homolog                  | 0,376702  | 0,255754     |
| 2703 | NS1BP_MOUSE  | Ivns1abp | Influenza virus NS1A-binding protein homolog                            | 0,0755923 | -0,048999    |
| 2704 | ALS2_MOUSE   | Als2     | Alsin                                                                   | 0,701031  | 0,496439     |
| 2705 | RAB31_MOUSE  | Rab31    | Ras-related protein Rab-31                                              | 0,548745  | -0,632719    |
| 2706 | TADBP_MOUSE  | Tardbp   | TAR DNA-binding protein 43                                              | 0,527334  | 0,360643     |
| 2707 | HNRL_MOUSE   | HnrnpII  | Heterogeneous nuclear ribonucleoprotein L-like                          | 0,221164  | 0,0694553    |
| 2708 | ETFD_MOUSE   | Etfdh    | Electron transfer flavoprotein-ubiquinone oxidoreductase, mitochondrial | 0,162197  | 0,0665565    |
| 2709 | THIKA_MOUSE  | Acaa1a   | 3-ketoacyl-CoA thiolase A, peroxisomal                                  | 1,29374   | 0,975055     |
| 2710 | COA7_MOUSE   | Coa7     | Cytochrome c oxidase assembly factor 7                                  | 0,162203  | -0,130087    |
| 2711 | TRFE_MOUSE   | Tf       | Serotransferrin                                                         | 0,362954  | 0,268967     |
| 2712 | EXOS4_MOUSE  | Exosc4   | Exosome complex component RRP41                                         | 0,797475  | 1,12846      |
| 2713 | RHEB_MOUSE   | Rheb     | GTP-binding protein Rheb                                                | 1,82337   | 0,443243     |
| 2714 | BCL7B_MOUSE  | Bcl7b    | B-cell CLL/lymphoma 7 protein family member B                           | 0,947983  | 0,64496      |
| 2715 | COG2_MOUSE   | Cog2     | Conserved oligomeric Golgi complex subunit 2                            | 0,440944  | 0,150842     |
| 2716 | SF3B3_MOUSE  | Sf3b3    | Splicing factor 3B subunit 3                                            | 0,45701   | -0,184316    |
| 2717 | GOGA2_MOUSE  | Golga2   | Golgin subfamily A member 2                                             | 2,02554   | 0,692187     |
| 2718 | FA49B_MOUSE  | Fam49b   | Protein FAM49B                                                          | 0,318982  | 0,119181     |
| 2719 | DDX27_MOUSE  | Ddx27    | Probable ATP-dependent RNA helicase DDX27                               | 0,759382  | 0,233138     |
| 2720 | RM37_MOUSE   | Mrpl37   | 39S ribosomal protein L37, mitochondrial                                | 0,910299  | -0,504908    |
| 2721 | TOIP1_MOUSE  | Tor1aip1 | Torsin-1A-interacting protein 1                                         | 0,744043  | 0,856506     |
| 2722 | SMTN_MOUSE   | Smtn     | Smoothelin                                                              | 0,119627  | -0,149842    |
| 2723 | CHM1A_MOUSE  | Chmp1a   | Charged multivesicular body protein 1a                                  | 0,916368  | 0,402575     |
| 2724 | QORL1_MOUSE  | Cryz1    | Quinone oxidoreductase-like protein 1                                   | 0,717427  | 0,289792     |
| 2725 | PDIA5_MOUSE  | Pdia5    | Protein disulfide-isomerase A5                                          | 0,435256  | -0,216866    |
| 2726 | MACD1_MOUSE  | MacroD1  | ADP-ribose glycohydrolase MACROD1                                       | 0,599495  | -0,382129    |
| 2727 | SYDC_MOUSE   | Dars     | Aspartate--tRNA ligase, cytoplasmic                                     | 1,82981   | 0,390141     |
| 2728 | ITPI2_MOUSE  | Itprid2  | Protein ITPRID2                                                         | 0,105447  | 0,0951748    |
| 2729 | PPP6R3_MOUSE | Ppp6r3   | Serine/threonine-protein phosphatase 6 regulatory subunit 3             | 0,224183  | -0,210066    |
| 2730 | C1TC_MOUSE   | Mthfd1   | C-1-tetrahydrofolate synthase, cytoplasmic                              | 0,0803873 | 0,0358135    |
| 2731 | PCY2_MOUSE   | Pcyt2    | Ethanolamine-phosphate cytidylyltransferase                             | 0,673134  | 0,422957     |
| 2732 | TBB6_MOUSE   | Tubb6    | Tubulin beta-6 chain                                                    | 0,0963306 | -0,0306671   |
| 2733 | GMPPA_MOUSE  | Gmppa    | Mannose-1-phosphate guanylttransferase alpha                            | 0,482351  | 0,36182      |
| 2734 | ZN330_MOUSE  | Znf330   | Zinc finger protein 330                                                 | 0,0209427 | 0,0148163    |
| 2735 | CLIP1_MOUSE  | Clip1    | CAP-Gly domain-containing linker protein 1                              | 1,20874   | 0,293873     |
| 2736 | NOP2_MOUSE   | Nop2     | Probable 28S rRNA (cytosine-C(5))-methyltransferase                     | 0,656427  | -0,214596    |
| 2737 | GLYR1_MOUSE  | Glyr1    | Putative oxidoreductase GLYR1                                           | 0,133343  | 0,0780968    |
| 2738 | MARC2_MOUSE  | Marc2    | Mitochondrial amidoxime reducing component 2                            | 0,926176  | 0,294851     |
| 2739 | LRC59_MOUSE  | Lrrc59   | Leucine-rich repeat-containing protein 59                               | 0,002577  | -0,000540161 |
| 2740 | CHID1_MOUSE  | Chid1    | Chitinase domain-containing protein 1                                   | 0,896518  | 0,436899     |
| 2741 | PDIA6_MOUSE  | Pdia6    | Protein disulfide-isomerase A6                                          | 1,66436   | 0,503585     |
| 2742 | PDE2A_MOUSE  | Pde2a    | cGMP-dependent 3',5'-cyclic phosphodiesterase                           | 0,7165    | -0,546132    |
| 2743 | PRPF3_MOUSE  | Prpf3    | U4/U6 small nuclear ribonucleoprotein Prp3                              | 0,374388  | 0,190036     |
| 2744 | PLRG1_MOUSE  | Plrg1    | Pleiotropic regulator 1                                                 | 0,802145  | 0,203293     |
| 2745 | UBXN1_MOUSE  | Ubxn1    | UBX domain-containing protein 1                                         | 0,544491  | 0,42606      |
| 2746 | GGACT_MOUSE  | Ggact    | Gamma-glutamylaminecyclotransferase                                     | 1,23286   | -0,662317    |
| 2747 | DBR1_MOUSE   | Dbr1     | Lariat debranching enzyme                                               | 0,356106  | -0,301723    |
| 2748 | STEAP4_MOUSE | Steap4   | Metalloreductase STEAP4                                                 | 0,771491  | -0,486785    |
| 2749 | BLVRB_MOUSE  | Blvrb    | Flavin reductase (NADPH)                                                | 0,535069  | 0,354353     |
| 2750 | WBP11_MOUSE  | Wbp11    | WW domain-binding protein 11                                            | 0,0151022 | 0,0100079    |
| 2751 | RPAB3_MOUSE  | Polr2h   | DNA-directed RNA polymerases I, II, and III subunit RPABC3              | 0,0472045 | 0,0255997    |

|      |             |         |                                                                            |           |            |
|------|-------------|---------|----------------------------------------------------------------------------|-----------|------------|
| 2752 | STA13_MOUSE | Stard13 | StAR-related lipid transfer protein 13                                     | 1,74023   | 0,224737   |
| 2753 | TM1L1_MOUSE | Tom111  | TOM1-like protein 1                                                        | 0,455004  | 0,232324   |
| 2754 | RT4I1_MOUSE | Rtn4ip1 | Reticulon-4-interacting protein 1, mitochondrial                           | 0,110569  | -0,0498055 |
| 2755 | LTMD1_MOUSE | Letmd1  | LETM1 domain-containing protein 1                                          | 0,101498  | -0,104314  |
| 2756 | BODG_MOUSE  | Bbox1   | Gamma-butyrobetaine dioxygenase                                            | 0,314342  | 0,114527   |
| 2757 | ESAM_MOUSE  | Esam    | Endothelial cell-selective adhesion molecule                               | 0,154377  | 0,169147   |
| 2758 | ATAD3_MOUSE | Atad3   | ATPase family AAA domain-containing protein 3                              | 0,164798  | 0,0619049  |
| 2759 | SFXN5_MOUSE | Sfxn5   | Sideroflexin-5                                                             | 0,149896  | 0,0942974  |
| 2760 | SFXN2_MOUSE | Sfxn2   | Sideroflexin-2                                                             | 0,222754  | -0,116939  |
| 2761 | TALDO_MOUSE | Taldo1  | Transaldolase                                                              | 0,0502639 | 0,0223114  |
| 2762 | ROAA_MOUSE  | Hnmpab  | Heterogeneous nuclear ribonucleoprotein A/B                                | 0,304213  | 0,181231   |
| 2763 | S14L2_MOUSE | Sec14l2 | SEC14-like protein 2                                                       | 0,571072  | 0,413261   |
| 2764 | GHDC_MOUSE  | Ghdc    | GH3 domain-containing protein                                              | 1,22663   | 0,807487   |
| 2765 | THUM1_MOUSE | Thumpd1 | THUMP domain-containing protein 1                                          | 0,910326  | 0,297153   |
| 2766 | DCMC_MOUSE  | Mlycd   | Malonyl-CoA decarboxylase, mitochondrial                                   | 0,191756  | 0,0936146  |
| 2767 | DRS7B_MOUSE | Dhrs7b  | Dehydrogenase/reductase SDR family member 7B                               | 0,538761  | 0,410563   |
| 2768 | RFC4_MOUSE  | Rfc4    | Replication factor C subunit 4                                             | 1,35907   | 0,450285   |
| 2769 | SIAS_MOUSE  | Nans    | Sialic acid synthase                                                       | 0,243221  | -0,234763  |
| 2770 | DHX58_MOUSE | Dhx58   | Probable ATP-dependent RNA helicase DHX58                                  | 2,14388   | 0,71088    |
| 2771 | CDK9_MOUSE  | Cdk9    | Cyclin-dependent kinase 9                                                  | 1,6829    | -0,636276  |
| 2772 | THTM_MOUSE  | Mpst    | 3-mercaptopyruvate sulfurtransferase                                       | 0,224922  | 0,173073   |
| 2773 | STML2_MOUSE | Stoml2  | Stomatin-like protein 2, mitochondrial                                     | 0,348792  | 0,344278   |
| 2774 | PACN3_MOUSE | Pacsin3 | Protein kinase C and casein kinase II substrate protein 3                  | 0,474597  | 0,181736   |
| 2775 | MVD1_MOUSE  | Mvd     | Diphosphomevalonate decarboxylase                                          | 0,181298  | -0,453321  |
| 2776 | PSIP1_MOUSE | Psp1    | PC4 and SFRS1-interacting protein                                          | 1,15283   | 0,397185   |
| 2777 | RP25L_MOUSE | Rpp25l  | Ribonuclease P protein subunit p25-like protein                            | 1,25725   | 0,55838    |
| 2778 | PSMD6_MOUSE | Psm6    | 26S proteasome non-ATPase regulatory subunit 6                             | 0,868593  | -1,0657    |
| 2779 | RAP1B_MOUSE | Rap1b   | Ras-related protein Rap-1b                                                 | 1,56519   | 0,197852   |
| 2780 | HOME3_MOUSE | Homer3  | Homer protein homolog 3                                                    | 0,815355  | 0,594337   |
| 2781 | SFXN1_MOUSE | Sfxn1   | Sideroflexin-1                                                             | 0,138974  | -0,112987  |
| 2782 | TINAL_MOUSE | Tinagl1 | Tubulointerstitial nephritis antigen-like                                  | 0,0906848 | 0,0820976  |
| 2783 | NMNA3_MOUSE | Nmnat3  | Nicotinamide/nicotinic acid mononucleotide adenylyltransferase 3           | 0,547672  | -0,333942  |
| 2784 | SMRD2_MOUSE | Smardc2 | SWI/SNF-related matrix-associated actin-dependent regulator of chromatin : | 0,687649  | 0,241053   |
| 2785 | GATB_MOUSE  | Gatb    | Glutamyl-tRNA(Gln) amidotransferase subunit B, mitochondrial               | 0,762085  | 0,371675   |
| 2786 | MTND_MOUSE  | Adi1    | 1,2-dihydroxy-3-keto-5-methylthiopentene dioxygenase                       | 2,86695   | 0,364408   |
| 2787 | ACY1_MOUSE  | Acy1    | Aminoacylase-1                                                             | 0,509815  | -0,264122  |
| 2788 | LIMS1_MOUSE | Lims1   | LIM and senescent cell antigen-like-containing domain protein 1            | 0,163632  | -0,247995  |
| 2789 | GORS2_MOUSE | Gorasp2 | Golgi reassembly-stacking protein 2                                        | 0,389922  | 0,191243   |
| 2790 | EIF3M_MOUSE | Eif3m   | Eukaryotic translation initiation factor 3 subunit M                       | 0,407783  | -0,250414  |
| 2791 | NXF1_MOUSE  | Nxf1    | Nuclear RNA export factor 1                                                | 1,5104    | 0,515308   |
| 2792 | ECHB_MOUSE  | Hadhb   | Trifunctional enzyme subunit beta, mitochondrial                           | 0,442825  | 0,191341   |
| 2793 | GIMA4_MOUSE | Gimap4  | GTPase IMAP family member 4                                                | 0,0114083 | 0,00880814 |
| 2794 | TRABD_MOUSE | Trabd   | TraB domain-containing protein                                             | 1,58792   | 0,529511   |
| 2795 | ARP3_MOUSE  | Actr3   | Actin-related protein 3                                                    | 0,595359  | -0,275338  |
| 2796 | PDXD1_MOUSE | Pdxd1   | Pyridoxal-dependent decarboxylase domain-containing protein 1              | 0,692     | 0,187651   |
| 2797 | UFSP2_MOUSE | Ufsp2   | Ufm1-specific protease 2                                                   | 0,0277204 | -0,0136166 |
| 2798 | ARFG2_MOUSE | Arfgap2 | ADP-ribosylation factor GTPase-activating protein 2                        | 1,23886   | 0,405437   |
| 2799 | ES8L2_MOUSE | Eps8l2  | Epidermal growth factor receptor kinase substrate 8-like protein 2         | 1,30043   | 0,776799   |
| 2800 | EMIL1_MOUSE | Emilin1 | EMILIN-1                                                                   | 0,518738  | 0,241713   |
| 2801 | NONO_MOUSE  | Nono    | Non-POU domain-containing octamer-binding protein                          | 0,410545  | 0,268606   |
| 2802 | PLST_MOUSE  | Pls3    | Plastin-3                                                                  | 0,434757  | 0,314777   |
| 2803 | AASS_MOUSE  | Aass    | Alpha-aminoadipic semialdehyde synthase, mitochondrial                     | 2,1499    | -0,565291  |

|      |             |         |                                                                           |            |            |
|------|-------------|---------|---------------------------------------------------------------------------|------------|------------|
| 2804 | RRAGC_MOUSE | Rragc   | Ras-related GTP-binding protein C                                         | 0,308338   | 0,177429   |
| 2805 | SERC_MOUSE  | Psat1   | Phosphoserine aminotransferase                                            | 1,70236    | 1,83904    |
| 2806 | RTF2_MOUSE  | Rtf2    | Replication termination factor 2                                          | 2,07805    | 1,46       |
| 2807 | GLO2_MOUSE  | Hagh    | Hydroxyacylglutathione hydrolase, mitochondrial                           | 0,69025    | 0,42654    |
| 2808 | VMA5A_MOUSE | Vwa5a   | von Willebrand factor A domain-containing protein 5A                      | 0,219931   | 0,174913   |
| 2809 | UN45A_MOUSE | Unc45a  | Protein unc-45 homolog A                                                  | 0,205014   | 0,12565    |
| 2810 | MAOM_MOUSE  | Me2     | NAD-dependent malic enzyme, mitochondrial                                 | 0,354534   | 0,204102   |
| 2811 | TMED9_MOUSE | Tmed9   | Transmembrane emp24 domain-containing protein 9                           | 0,0413936  | -0,0268021 |
| 2812 | RBM10_MOUSE | Rbm10   | RNA-binding protein 10                                                    | 0,828193   | 0,241886   |
| 2813 | LSR_MOUSE   | Lsr     | Lipolysis-stimulated lipoprotein receptor                                 | 0,197729   | 0,350111   |
| 2814 | STK24_MOUSE | Stk24   | Serine/threonine-protein kinase 24                                        | 0,241593   | -0,465971  |
| 2815 | ACON_MOUSE  | Aco2    | Aconitate hydratase, mitochondrial                                        | 0,0338953  | -0,0253662 |
| 2816 | DCTN2_MOUSE | Dctn2   | Dynactin subunit 2                                                        | 1,36358    | 0,432841   |
| 2817 | NEUA_MOUSE  | Cmas    | N-acetylneuraminate cytidyltransferase                                    | 1,45545    | 0,556095   |
| 2818 | DPP3_MOUSE  | Dpp3    | Dipeptidyl peptidase 3                                                    | 0,241087   | -0,116549  |
| 2819 | SYHM_MOUSE  | Hars2   | Probable histidine--tRNA ligase, mitochondrial                            | 1,05718    | 0,608889   |
| 2820 | CIAO1_MOUSE | Ciao1   | Probable cytosolic iron-sulfur protein assembly protein CIAO1             | 0,428993   | 0,31245    |
| 2821 | EPN4_MOUSE  | Clint1  | Clathrin interactor 1                                                     | 0,0955051  | -0,0767277 |
| 2822 | CRYL1_MOUSE | Cryl1   | Lambda-crystallin homolog                                                 | 0,261845   | -0,545572  |
| 2823 | PRP19_MOUSE | Prpf19  | Pre-mRNA-processing factor 19                                             | 0,0691824  | 0,0526581  |
| 2824 | NAMPT_MOUSE | Nampt   | Nicotinamide phosphoribosyltransferase                                    | 1,15656    | 0,359895   |
| 2825 | LACB2_MOUSE | Lactb2  | Endoribonuclease LACTB2                                                   | 0,513372   | 0,245379   |
| 2826 | PPIF_MOUSE  | Ppif    | Peptidyl-prolyl cis-trans isomerase F, mitochondrial                      | 0,668474   | -0,340483  |
| 2827 | DJB11_MOUSE | Dnajb11 | DnaJ homolog subfamily B member 11                                        | 0,732947   | 0,54519    |
| 2828 | TARA_MOUSE  | Triobp  | TRIO and F-actin-binding protein                                          | 0,802262   | 0,366582   |
| 2829 | MLF2_MOUSE  | Mlf2    | Myeloid leukemia factor 2                                                 | 1,19943    | 0,642433   |
| 2830 | GAK_MOUSE   | Gak     | Cyclin-G-associated kinase                                                | 0,150877   | 0,0585354  |
| 2831 | DHRS1_MOUSE | Dhrs1   | Dehydrogenase/reductase SDR family member 1                               | 2,0284     | 0,465301   |
| 2832 | 3HIDH_MOUSE | Hibadh  | 3-hydroxyisobutyrate dehydrogenase, mitochondrial                         | 0,47864    | 0,172471   |
| 2833 | GSTT3_MOUSE | Gstt3   | Glutathione S-transferase theta-3                                         | 0,824337   | -0,544962  |
| 2834 | GMPR2_MOUSE | Gmpr2   | GMP reductase 2                                                           | 0,96238    | 0,378452   |
| 2835 | IF2B_MOUSE  | Eif2s2  | Eukaryotic translation initiation factor 2 subunit 2                      | 1,04811    | 0,60762    |
| 2836 | F10A1_MOUSE | St13    | Hsc70-interacting protein                                                 | 1,17807    | 0,525565   |
| 2837 | SNTB1_MOUSE | Sntb1   | Beta-1-syntrophin                                                         | 1,32621    | 0,146969   |
| 2838 | DHRS4_MOUSE | Dhrs4   | Dehydrogenase/reductase SDR family member 4                               | 1,82733    | 0,6955     |
| 2839 | MAT2B_MOUSE | Mat2b   | Methionine adenosyltransferase 2 subunit beta                             | 0,151401   | -0,180743  |
| 2840 | SARDH_MOUSE | Sardh   | Sarcosine dehydrogenase, mitochondrial                                    | 0,102621   | -0,0942528 |
| 2841 | CSTF1_MOUSE | Cstf1   | Cleavage stimulation factor subunit 1                                     | 0,272171   | 0,103218   |
| 2842 | NDUAA_MOUSE | Ndufa10 | NADH dehydrogenase [ubiquinone] 1 alpha subcomplex subunit 10, mitochondr | 1,62299    | -0,663675  |
| 2843 | ETFA_MOUSE  | Etfa    | Electron transfer flavoprotein subunit alpha, mitochondrial               | 0,0621159  | -0,035841  |
| 2844 | EI2BA_MOUSE | Eif2b1  | Translation initiation factor eIF-2B subunit alpha                        | 0,0144377  | 0,0129742  |
| 2845 | PEX6_MOUSE  | Pex6    | Peroxisome assembly factor 2                                              | 1,04287    | 0,859903   |
| 2846 | CSN1_MOUSE  | Gps1    | COP9 signalosome complex subunit 1                                        | 0,204096   | -0,152526  |
| 2847 | DDAH2_MOUSE | Ddah2   | N(G),N(G)-dimethylarginine dimethylaminohydrolase 2                       | 0,407847   | -0,157195  |
| 2848 | EI2BB_MOUSE | Eif2b2  | Translation initiation factor eIF-2B subunit beta                         | 0,04574    | 0,033839   |
| 2849 | ABCF2_MOUSE | Abcf2   | ATP-binding cassette sub-family F member 2                                | 1,28259    | 0,501963   |
| 2850 | RTCB_MOUSE  | Rtcb    | tRNA-splicing ligase RtcB homolog                                         | 0,436069   | 0,231028   |
| 2851 | UBP16_MOUSE | Usp16   | Ubiquitin carboxyl-terminal hydrolase 16                                  | 1,10534    | 0,526481   |
| 2852 | CSTF3_MOUSE | Cstf3   | Cleavage stimulation factor subunit 3                                     | 0,00714016 | -0,0105984 |
| 2853 | HGS_MOUSE   | Hgs     | Hepatocyte growth factor-regulated tyrosine kinase substrate              | 0,976788   | 0,483723   |
| 2854 | CLP1_MOUSE  | Clp1    | Polyribonucleotide 5'-hydroxyl-kinase Clp1                                | 1,29846    | 0,596835   |
| 2855 | GPX7_MOUSE  | Gpx7    | Glutathione peroxidase 7                                                  | 0,733951   | 0,320808   |

|      |             |          |                                                              |            |             |
|------|-------------|----------|--------------------------------------------------------------|------------|-------------|
| 2856 | PWP1_MOUSE  | Pwp1     | Periodic tryptophan protein 1 homolog                        | 0,482574   | 0,482602    |
| 2857 | CK5P3_MOUSE | Cdk5rap3 | CDK5 regulatory subunit-associated protein 3                 | 0,0872006  | 0,0607723   |
| 2858 | DOHH_MOUSE  | Dohh     | Deoxyhypusine hydroxylase                                    | 0,492771   | 0,324611    |
| 2859 | GRPE1_MOUSE | Grpel1   | GrpE protein homolog 1, mitochondrial                        | 0,294089   | 0,133847    |
| 2860 | ABD12_MOUSE | Abhd12   | Lysophosphatidylserine lipase ABHD12                         | 0,670356   | 0,761686    |
| 2861 | SERB_MOUSE  | Psph     | Phosphoserine phosphatase                                    | 1,24194    | 0,573192    |
| 2862 | DPY30_MOUSE | Dpy30    | Protein dpy-30 homolog                                       | 0,0708805  | -0,0304218  |
| 2863 | CH1B1_MOUSE | Chmp1b1  | Charged multivesicular body protein 1b-1                     | 0,115837   | -0,0263027  |
| 2864 | PARK7_MOUSE | Park7    | Protein/nucleic acid deglycase DJ-1                          | 0,499645   | 0,491       |
| 2865 | NDUS5_MOUSE | Ndufs5   | NADH dehydrogenase [ubiquinone] iron-sulfur protein 5        | 0,606608   | -1,32013    |
| 2866 | LIAS_MOUSE  | Lias     | Lipoyl synthase, mitochondrial                               | 1,04202    | 0,753648    |
| 2867 | PPIP2_MOUSE | Pstpip2  | Proline-serine-threonine phosphatase-interacting protein 2   | 0,59916    | 0,5686      |
| 2868 | RNPS1_MOUSE | Rnps1    | RNA-binding protein with serine-rich domain 1                | 1,11121    | 0,424879    |
| 2869 | HSP7E_MOUSE | Hspa14   | Heat shock 70 kDa protein 14                                 | 1,94834    | 1,58064     |
| 2870 | NCK1_MOUSE  | Nck1     | Cytoplasmic protein NCK1                                     | 0,418733   | -0,200391   |
| 2871 | DNJA3_MOUSE | Dnaja3   | DnaJ homolog subfamily A member 3, mitochondrial             | 0,621764   | 0,53104     |
| 2872 | NASP_MOUSE  | Nasp     | Nuclear autoantigenic sperm protein                          | 0,500406   | 0,502045    |
| 2873 | NOG1_MOUSE  | Gtpbp4   | Nucleolar GTP-binding protein 1                              | 0,438758   | 0,27328     |
| 2874 | RB6I2_MOUSE | Erc1     | ELKS/Rab6-interacting/CAST family member 1                   | 0,245839   | 0,144099    |
| 2875 | DDX50_MOUSE | Ddx50    | ATP-dependent RNA helicase DDX50                             | 0,968582   | 0,501705    |
| 2876 | ARBK1_MOUSE | Grk2     | Beta-adrenergic receptor kinase 1                            | 0,0470639  | -0,0645077  |
| 2877 | SYK_MOUSE   | Kars     | Lysine-tRNA ligase                                           | 0,17431    | 0,0783958   |
| 2878 | PCCB_MOUSE  | Pccb     | Propionyl-CoA carboxylase beta chain, mitochondrial          | 0,0288177  | -0,037582   |
| 2879 | BRAP_MOUSE  | Brp      | BRCA1-associated protein                                     | 0,232335   | -0,184884   |
| 2880 | SRRT_MOUSE  | Srrt     | Serrate RNA effector molecule homolog                        | 0,411871   | -0,180456   |
| 2881 | MCCA_MOUSE  | Mccc1    | Methylcrotonoyl-CoA carboxylase subunit alpha, mitochondrial | 0,271384   | 0,162399    |
| 2882 | MLXPL_MOUSE | Mixipl   | Carbohydrate-responsive element-binding protein              | 0,433206   | 0,410019    |
| 2883 | PECR_MOUSE  | Pecr     | Peroxisomal trans-2-enoyl-CoA reductase                      | 0,00671981 | -0,00460129 |
| 2884 | TYPH_MOUSE  | Tymp     | Thymidine phosphorylase                                      | 0,0170215  | -0,0194809  |
| 2885 | RT18B_MOUSE | Mrps18b  | 28S ribosomal protein S18b, mitochondrial                    | 0,288041   | -0,457663   |
| 2886 | RT18A_MOUSE | Mrps18a  | 28S ribosomal protein S18a, mitochondrial                    | 0,671666   | 0,426963    |
| 2887 | RT05_MOUSE  | Mrps5    | 28S ribosomal protein S5, mitochondrial                      | 0,273508   | 0,198383    |
| 2888 | RM43_MOUSE  | Mrpl43   | 39S ribosomal protein L43, mitochondrial                     | 0,206043   | -0,0741123  |
| 2889 | RM34_MOUSE  | Mrpl34   | 39S ribosomal protein L34, mitochondrial                     | 0,241448   | 0,264737    |
| 2890 | RM27_MOUSE  | Mrpl27   | 39S ribosomal protein L27, mitochondrial                     | 0,0429644  | -0,0295963  |
| 2891 | RM09_MOUSE  | Mrpl9    | 39S ribosomal protein L9, mitochondrial                      | 0,0734539  | 0,0501068   |
| 2892 | RM03_MOUSE  | Mrpl3    | 39S ribosomal protein L3, mitochondrial                      | 1,11324    | -0,290558   |
| 2893 | RM01_MOUSE  | Mrpl1    | 39S ribosomal protein L1, mitochondrial                      | 0,0790256  | 0,0577705   |
| 2894 | SF3B1_MOUSE | Sf3b1    | Splicing factor 3B subunit 1                                 | 0,764995   | -0,245968   |
| 2895 | ANR17_MOUSE | Ankrd17  | Ankyrin repeat domain-containing protein 17                  | 0,0293629  | 0,0113754   |
| 2896 | PARD3_MOUSE | Pard3    | Partitioning defective 3 homolog                             | 1,6952     | 0,519549    |
| 2897 | PG12B_MOUSE | Pla2g12b | Group XIIb secretory phospholipase A2-like protein           | 1,01998    | 1,15967     |
| 2898 | NUDT7_MOUSE | Nudt7    | Peroxisomal coenzyme A diphosphatase NUDT7                   | 0,850481   | 0,867003    |
| 2899 | HPBP1_MOUSE | Hspbp1   | Hsp70-binding protein 1                                      | 0,890933   | -0,408436   |
| 2900 | NU155_MOUSE | Nup155   | Nuclear pore complex protein Nup155                          | 0,493085   | -0,237752   |
| 2901 | AAAD_MOUSE  | Aadac    | Arylacetamide deacetylase                                    | 0,155631   | -0,0975368  |
| 2902 | OGFR_MOUSE  | Ogfr     | Opioid growth factor receptor                                | 0,652864   | 0,423294    |
| 2903 | LPIN2_MOUSE | Lpin2    | Phosphatidate phosphatase LPIN2                              | 0,536035   | -0,565951   |
| 2904 | RRBP1_MOUSE | Rrbp1    | Ribosome-binding protein 1                                   | 1,1641     | 0,267319    |
| 2905 | UBXN6_MOUSE | Ubxn6    | UBX domain-containing protein 6                              | 0,669786   | 0,486582    |
| 2906 | GDIR1_MOUSE | Arhgdia  | Rho GDP-dissociation inhibitor 1                             | 0,150321   | -0,0446949  |
| 2907 | DHX30_MOUSE | Dhx30    | ATP-dependent RNA helicase DHX30                             | 0,962119   | 0,478506    |

|      |             |           |                                                                         |           |            |
|------|-------------|-----------|-------------------------------------------------------------------------|-----------|------------|
| 2908 | PRP8_MOUSE  | Prpf8     | Pre-mRNA-processing-splicing factor 8                                   | 0,125546  | 0,0661201  |
| 2909 | PRPK_MOUSE  | Tp53rk    | EKC/KEOPS complex subunit Tp53rk                                        | 0,655275  | 0,381578   |
| 2910 | IF2B3_MOUSE | Igf2bp3   | Insulin-like growth factor 2 mRNA-binding protein 3                     | 0,276113  | 0,26427    |
| 2911 | NDUA5_MOUSE | Ndufa5    | NADH dehydrogenase [ubiquinone] 1 alpha subcomplex subunit 5            | 0,478008  | 0,276111   |
| 2912 | COX6C_MOUSE | Cox6c     | Cytochrome c oxidase subunit 6C                                         | 0,22045   | -0,224301  |
| 2913 | ATP5L_MOUSE | Atp5mg    | ATP synthase subunit g, mitochondrial                                   | 0,586002  | -0,22541   |
| 2914 | RL17_MOUSE  | Rpl17     | 60S ribosomal protein L17                                               | 1,14544   | 0,631869   |
| 2915 | RM15_MOUSE  | Mrpl15    | 39S ribosomal protein L15, mitochondrial                                | 0,21041   | -0,0734715 |
| 2916 | NANP_MOUSE  | Nanp      | N-acylneuraminate-9-phosphatase                                         | 0,520394  | 0,170988   |
| 2917 | MYDGF_MOUSE | Mydgf     | Myeloid-derived growth factor                                           | 0,489316  | 0,403655   |
| 2918 | NOP16_MOUSE | Nop16     | Nucleolar protein 16                                                    | 0,407999  | 0,139479   |
| 2919 | LGUL_MOUSE  | Glo1      | Lactoylglutathione lyase                                                | 1,51275   | 0,328864   |
| 2920 | GLOD4_MOUSE | Glod4     | Glyoxalase domain-containing protein 4                                  | 0,542532  | -0,162641  |
| 2921 | ARPC5_MOUSE | Arpc5     | Actin-related protein 2/3 complex subunit 5                             | 0,633307  | 0,397522   |
| 2922 | SSRB_MOUSE  | Ssr2      | Translocon-associated protein subunit beta                              | 0,518595  | 0,200738   |
| 2923 | MAP12_MOUSE | Metap1d   | Methionine aminopeptidase 1D, mitochondrial                             | 0,533759  | 0,619183   |
| 2924 | ATG3_MOUSE  | Atg3      | Ubiquitin-like-conjugating enzyme ATG3                                  | 1,03855   | 0,791927   |
| 2925 | RT16_MOUSE  | Mrps16    | 28S ribosomal protein S16, mitochondrial                                | 0,233785  | -0,206552  |
| 2926 | MRM2_MOUSE  | Mrm2      | rRNA methyltransferase 2, mitochondrial                                 | 1,06728   | 0,326455   |
| 2927 | RM51_MOUSE  | Mrpl51    | 39S ribosomal protein L51, mitochondrial                                | 0,854457  | 1,29238    |
| 2928 | AMPL_MOUSE  | Lap3      | Cytosol aminopeptidase                                                  | 0,455348  | 0,284155   |
| 2929 | COXM1_MOUSE | Cmc1      | COX assembly mitochondrial protein homolog                              | 0,155033  | -0,252271  |
| 2930 | RM24_MOUSE  | Mrpl24    | 39S ribosomal protein L24, mitochondrial                                | 0,589415  | -0,135793  |
| 2931 | CHMP3_MOUSE | Chmp3     | Charged multivesicular body protein 3                                   | 0,49588   | -0,431159  |
| 2932 | LTOR1_MOUSE | Lamtor1   | Ragulator complex protein LAMTOR1                                       | 0,319568  | -0,248373  |
| 2933 | RM49_MOUSE  | Mrpl49    | 39S ribosomal protein L49, mitochondrial                                | 0,778315  | -0,258187  |
| 2934 | NUDC2_MOUSE | Nudcd2    | NudC domain-containing protein 2                                        | 0,727145  | 0,83367    |
| 2935 | NCBP2_MOUSE | Ncbp2     | Nuclear cap-binding protein subunit 2                                   | 0,868436  | 0,391335   |
| 2936 | NDUC2_MOUSE | Ndufc2    | NADH dehydrogenase [ubiquinone] 1 subunit C2                            | 1,32547   | -0,516661  |
| 2937 | USE1_MOUSE  | Use1      | Vesicle transport protein USE1                                          | 2,51219   | 0,464207   |
| 2938 | 6PGL_MOUSE  | Pgl5      | 6-phosphogluconolactonase                                               | 1,02861   | 0,757648   |
| 2939 | DECR_MOUSE  | Decr1     | 2,4-dienoyl-CoA reductase, mitochondrial                                | 0,467633  | 0,359429   |
| 2940 | MTAP_MOUSE  | Mtap      | S-methyl-5'-thioadenosine phosphorylase                                 | 0,416822  | 0,178035   |
| 2941 | QCR8_MOUSE  | Uqcrc     | Cytochrome b-c1 complex subunit 8                                       | 0,473108  | 0,284129   |
| 2942 | NDUA2_MOUSE | Ndufa2    | NADH dehydrogenase [ubiquinone] 1 alpha subcomplex subunit 2            | 0,176294  | 0,183871   |
| 2943 | TXND9_MOUSE | Txndc9    | Thioredoxin domain-containing protein 9                                 | 0,916972  | 0,403223   |
| 2944 | VPS25_MOUSE | Vps25     | Vacuolar protein-sorting-associated protein 25                          | 1,11273   | -0,367715  |
| 2945 | TIM22_MOUSE | Timm22    | Mitochondrial import inner membrane translocase subunit Tim22           | 1,2587    | -0,583173  |
| 2946 | FIS1_MOUSE  | Fis1      | Mitochondrial fission 1 protein                                         | 1,47104   | 0,934768   |
| 2947 | TPPC5_MOUSE | Trappc5   | Trafficking protein particle complex subunit 5                          | 1,2635    | 0,376024   |
| 2948 | SDHB_MOUSE  | Sdhb      | Succinate dehydrogenase [ubiquinone] iron-sulfur subunit, mitochondrial | 0,692047  | 0,204164   |
| 2949 | MCRI2_MOUSE | Mcrip2    | MAPK regulated corepressor interacting protein 2                        | 1,37058   | 0,557104   |
| 2950 | BZW1_MOUSE  | Bzw1      | Basic leucine zipper and W2 domain-containing protein 1                 | 1,01101   | -0,423409  |
| 2951 | NDUB4_MOUSE | Ndufb4    | NADH dehydrogenase [ubiquinone] 1 beta subcomplex subunit 4             | 0,0880308 | 0,0687328  |
| 2952 | SAR1B_MOUSE | Sar1b     | GTP-binding protein SAR1b                                               | 0,725967  | 0,2853     |
| 2953 | RAB5A_MOUSE | Rab5a     | Ras-related protein Rab-5A                                              | 0,945987  | -0,525987  |
| 2954 | CH1B2_MOUSE | Chmp1b2   | Charged multivesicular body protein 1b-2                                | 0,363756  | -0,140881  |
| 2955 | NPS3B_MOUSE | Nipsnap3b | Protein NipSnap homolog 3B                                              | 0,259015  | -0,179916  |
| 2956 | RTRAF_MOUSE | RTRAF     | RNA transcription, translation and transport factor protein             | 0,266928  | -0,123285  |
| 2957 | RM11_MOUSE  | Mrpl11    | 39S ribosomal protein L11, mitochondrial                                | 1,0475    | 0,527415   |
| 2958 | CPSF5_MOUSE | Nudt21    | Cleavage and polyadenylation specificity factor subunit 5               | 0,045875  | 0,032444   |
| 2959 | PCYOX_MOUSE | Pcyox1    | Prenylcysteine oxidase                                                  | 0,095543  | 0,0640579  |



|      |             |            |                                                                            |             |              |
|------|-------------|------------|----------------------------------------------------------------------------|-------------|--------------|
| 2960 | NDUB5_MOUSE | Ndufb5     | NADH dehydrogenase [ubiquinone] 1 beta subcomplex subunit 5, mitochondrion | 0,23777     | 0,13773      |
| 2961 | BT3L4_MOUSE | Btf3l4     | Transcription factor BTF3 homolog 4                                        | 0,42979     | 0,135126     |
| 2962 | GMFB_MOUSE  | Gmfb       | Glia maturation factor beta                                                | 0,0772269   | -0,0705147   |
| 2963 | COTL1_MOUSE | Cotl1      | Coactosin-like protein                                                     | 0,980352    | -0,523127    |
| 2964 | RU2B_MOUSE  | Snrbp2     | U2 small nuclear ribonucleoprotein B"                                      | 0,168058    | -0,112129    |
| 2965 | DENR_MOUSE  | Denr       | Density-regulated protein                                                  | 0,146317    | -0,165851    |
| 2966 | NDUB9_MOUSE | Ndufb9     | NADH dehydrogenase [ubiquinone] 1 beta subcomplex subunit 9                | 0,000949562 | -0,000593948 |
| 2967 | RM18_MOUSE  | Mrpl18     | 39S ribosomal protein L18, mitochondrial                                   | 0,0775847   | 0,0901375    |
| 2968 | RM35_MOUSE  | Mrpl35     | 39S ribosomal protein L35, mitochondrial                                   | 0,773606    | 0,793279     |
| 2969 | MOFA1_MOUSE | Mrfap1     | MORF4 family-associated protein 1                                          | 0,159476    | 0,281977     |
| 2970 | TXD17_MOUSE | Txndc17    | Thioredoxin domain-containing protein 17                                   | 0,789704    | 0,301485     |
| 2971 | GLRX3_MOUSE | Glx3       | Glutaredoxin-3                                                             | 0,064854    | 0,0483154    |
| 2972 | TRAP1_MOUSE | Trap1      | Heat shock protein 75 kDa, mitochondrial                                   | 0,178047    | -0,0600727   |
| 2973 | RM41_MOUSE  | Mrpl41     | 39S ribosomal protein L41, mitochondrial                                   | 1,02381     | -0,759836    |
| 2974 | RM33_MOUSE  | Mrpl33     | 39S ribosomal protein L33, mitochondrial                                   | 0,75347     | 0,708418     |
| 2975 | CHCH5_MOUSE | Chchd5     | Coiled-coil-helix-coiled-coil-helix domain-containing protein 5            | 0,436502    | 0,355867     |
| 2976 | AT5F1_MOUSE | Atp5pb     | ATP synthase F(0) complex subunit B1, mitochondrial                        | 0,556291    | 0,478451     |
| 2977 | LSM7_MOUSE  | Lsm7       | U6 snRNA-associated Sm-like protein LSM7                                   | 0,675341    | -1,03159     |
| 2978 | RS21_MOUSE  | Rps21      | 40S ribosomal protein S21                                                  | 0,306036    | 0,209008     |
| 2979 | ACO13_MOUSE | Acot13     | Acyl-coenzyme A thioesterase 13                                            | 0,430207    | -0,218213    |
| 2980 | PPP6_MOUSE  | Ppp6c      | Serine/threonine-protein phosphatase 6 catalytic subunit                   | 0,16013     | 0,138279     |
| 2981 | NOP10_MOUSE | Nop10      | H/ACA ribonucleoprotein complex subunit 3                                  | 0,17144     | -0,134076    |
| 2982 | MTNA_MOUSE  | Mri1       | Methylthioribose-1-phosphate isomerase                                     | 0,329659    | 0,235551     |
| 2983 | RBM7_MOUSE  | Rbm7       | RNA-binding protein 7                                                      | 1,07296     | 0,653957     |
| 2984 | TXD12_MOUSE | Txndc12    | Thioredoxin domain-containing protein 12                                   | 0,33612     | 0,134657     |
| 2985 | TIM16_MOUSE | Pam16      | Mitochondrial import inner membrane translocase subunit TIM16              | 0,00935326  | -0,00558662  |
| 2986 | RT24_MOUSE  | Mrps24     | 28S ribosomal protein S24, mitochondrial                                   | 0,39098     | 0,13838      |
| 2987 | TIM14_MOUSE | Dnajc19    | Mitochondrial import inner membrane translocase subunit TIM14              | 0,0675361   | -0,0207211   |
| 2988 | 1433B_MOUSE | Ywhab      | 14-3-3 protein beta/alpha                                                  | 0,766976    | -0,296624    |
| 2989 | YKT6_MOUSE  | Ykt6       | Synaptobrevin homolog YKT6                                                 | 0,554554    | -0,730363    |
| 2990 | ARL8B_MOUSE | Arl8b      | ADP-ribosylation factor-like protein 8B                                    | 0,119119    | -0,0916393   |
| 2991 | IFM3_MOUSE  | Ifitm3     | Interferon-induced transmembrane protein 3                                 | 0,0488266   | -0,0463665   |
| 2992 | CYB5B_MOUSE | Cyb5b      | Cytochrome b5 type B                                                       | 0,74163     | 0,377939     |
| 2993 | NDUA6_MOUSE | Ndufa6     | NADH dehydrogenase [ubiquinone] 1 alpha subcomplex subunit 6               | 0,113266    | 0,0231796    |
| 2994 | NDUB3_MOUSE | Ndufb3     | NADH dehydrogenase [ubiquinone] 1 beta subcomplex subunit 3                | 0,772279    | -0,358015    |
| 2995 | PSMD9_MOUSE | Psmc9      | 26S proteasome non-ATPase regulatory subunit 9                             | 0,37176     | 0,162971     |
| 2996 | RPP29_MOUSE | Pop4       | Ribonuclease P protein subunit p29                                         | 0,223293    | 0,447009     |
| 2997 | UFC1_MOUSE  | Ufc1       | Ubiquitin-fold modifier-conjugating enzyme 1                               | 0,0408358   | -0,0310154   |
| 2998 | OXLD1_MOUSE | Oxid1      | Oxidoreductase-like domain-containing protein 1                            | 1,38931     | -0,840195    |
| 2999 | PPID_MOUSE  | Ppid       | Peptidyl-prolyl cis-trans isomerase D                                      | 0,282406    | -0,189948    |
| 3000 | TMEM9_MOUSE | Tmem9      | Transmembrane protein 9                                                    | 0,645433    | 0,528557     |
| 3001 | VTA1_MOUSE  | Vta1       | Vacuolar protein sorting-associated protein VTA1 homolog                   | 0,520457    | 0,199392     |
| 3002 | WASC3_MOUSE | Washc3     | WASH complex subunit 3                                                     | 0,326267    | 0,15512      |
| 3003 | HYPK_MOUSE  | Hypk       | Huntingtin-interacting protein K                                           | 0,114479    | 0,0435699    |
| 3004 | KBR52_MOUSE | Nkiras2    | NF-kappa-B inhibitor-interacting Ras-like protein 2                        | 1,37527     | 0,356972     |
| 3005 | RL14_MOUSE  | Rpl14      | 60S ribosomal protein L14                                                  | 0,593146    | 0,293003     |
| 3006 | G45IP_MOUSE | Gadd45gip1 | Growth arrest and DNA damage-inducible proteins-interacting protein 1      | 0,471533    | 0,201465     |
| 3007 | NDUB7_MOUSE | Ndufb7     | NADH dehydrogenase [ubiquinone] 1 beta subcomplex subunit 7                | 0,502887    | -0,795546    |
| 3008 | M2OM_MOUSE  | Slc25a11   | Mitochondrial 2-oxoglutarate/malate carrier protein                        | 0,964613    | -0,324453    |
| 3009 | UCRI_MOUSE  | Uqcrls1    | Cytochrome b-c1 complex subunit Rieske, mitochondrial                      | 0,366447    | 0,114927     |
| 3010 | CHSP1_MOUSE | Carhsp1    | Calcium-regulated heat stable protein 1                                    | 0,140622    | 0,0774952    |
| 3011 | RT14_MOUSE  | Mrps14     | 28S ribosomal protein S14, mitochondrial                                   | 0,34079     | 0,22729      |

|      |             |          |                                                             |            |            |
|------|-------------|----------|-------------------------------------------------------------|------------|------------|
| 3012 | F136A_MOUSE | Fam136a  | Protein FAM136A                                             | 1,38086    | 0,60627    |
| 3013 | GOLP3_MOUSE | Golph3   | Golgi phosphoprotein 3                                      | 1,40763    | 0,503898   |
| 3014 | ATP5S_MOUSE | Dmac2l   | ATP synthase subunit s, mitochondrial                       | 1,29823    | -0,246856  |
| 3015 | EXOS5_MOUSE | Exosc5   | Exosome complex component RRP46                             | 1,27055    | 0,300498   |
| 3016 | SNX24_MOUSE | Snx24    | Sorting nexin-24                                            | 0,083879   | 0,0627338  |
| 3017 | NHP2_MOUSE  | Nhp2     | H/ACA ribonucleoprotein complex subunit 2                   | 0,00299617 | 0,00380688 |
| 3018 | HIUH_MOUSE  | Urah     | 5-hydroxyisourate hydrolase                                 | 0,0252522  | -0,0206341 |
| 3019 | MTFP1_MOUSE | Mtfp1    | Mitochondrial fission process protein 1                     | 0,272257   | -0,33007   |
| 3020 | MIC19_MOUSE | Chchd3   | MICOS complex subunit Mic19                                 | 1,11697    | 0,432291   |
| 3021 | LRC40_MOUSE | Lrrc40   | Leucine-rich repeat-containing protein 40                   | 0,529847   | 0,103696   |
| 3022 | OCAD1_MOUSE | Ociad1   | OCIA domain-containing protein 1                            | 0,0296015  | -0,0277191 |
| 3023 | EMC2_MOUSE  | Emc2     | ER membrane protein complex subunit 2                       | 1,21466    | 0,473907   |
| 3024 | ECD_MOUSE   | Ecd      | Protein ecdysoneless homolog                                | 0,637251   | 0,405288   |
| 3025 | RRP44_MOUSE | Dis3     | Exosome complex exonuclease RRP44                           | 2,25215    | 0,476709   |
| 3026 | SNW1_MOUSE  | Snw1     | SNW domain-containing protein 1                             | 0,932573   | 0,392738   |
| 3027 | RPR1B_MOUSE | Rprd1b   | Regulation of nuclear pre-mRNA domain-containing protein 1B | 0,114675   | -0,123489  |
| 3028 | RANB3_MOUSE | Ranbp3   | Ran-binding protein 3                                       | 0,0805083  | 0,0356613  |
| 3029 | SMC1A_MOUSE | Smc1a    | Structural maintenance of chromosomes protein 1A            | 1,12433    | 0,571707   |
| 3030 | ARPC2_MOUSE | Arpc2    | Actin-related protein 2/3 complex subunit 2                 | 0,311137   | -0,0917629 |
| 3031 | SMC3_MOUSE  | Smc3     | Structural maintenance of chromosomes protein 3             | 0,503368   | 0,286504   |
| 3032 | MARC1_MOUSE | Marc1    | Mitochondrial amidoxime-reducing component 1                | 0,58026    | 0,339017   |
| 3033 | RAVR1_MOUSE | Raver1   | Ribonucleoprotein PTB-binding 1                             | 0,921975   | 0,443255   |
| 3034 | GOGA1_MOUSE | Golga1   | Golgin subfamily A member 1                                 | 0,800624   | 1,30245    |
| 3035 | NUBPL_MOUSE | Nubpl    | Iron-sulfur protein NUBPL                                   | 0,245363   | 0,0665047  |
| 3036 | MFR1L_MOUSE | Mtfr1l   | Mitochondrial fission regulator 1-like                      | 0,554933   | 0,428344   |
| 3037 | NDUF7_MOUSE | Ndufaf7  | Protein arginine methyltransferase NDUFAF7, mitochondrial   | 0,473434   | 0,277349   |
| 3038 | BCCIP_MOUSE | Bccip    | BRCA2 and CDKN1A-interacting protein                        | 0,196602   | 0,248809   |
| 3039 | PUR9_MOUSE  | Atic     | Bifunctional purine biosynthesis protein PURH               | 0,560034   | 0,456456   |
| 3040 | CD2B2_MOUSE | Cd2bp2   | CD2 antigen cytoplasmic tail-binding protein 2              | 1,82025    | 2,27045    |
| 3041 | SNX2_MOUSE  | Snx2     | Sorting nexin-2                                             | 1,12694    | 0,350622   |
| 3042 | CTBL1_MOUSE | Ctnnbl1  | Beta-catenin-like protein 1                                 | 0,411277   | -0,140847  |
| 3043 | PFD1_MOUSE  | Pfdn1    | Prefoldin subunit 1                                         | 0,410591   | 0,249056   |
| 3044 | MSPD2_MOUSE | Mospd2   | Motile sperm domain-containing protein 2                    | 0,168219   | -0,144393  |
| 3045 | WDR73_MOUSE | Wdr73    | WD repeat-containing protein 73                             | 0,427667   | -0,501622  |
| 3046 | DDAH1_MOUSE | Ddah1    | N(G),N(G)-dimethylarginine dimethylaminohydrolase 1         | 0,525563   | -0,222716  |
| 3047 | INT11_MOUSE | Ints11   | Integrator complex subunit 11                               | 1,18288    | 0,456213   |
| 3048 | DDX28_MOUSE | Ddx28    | Probable ATP-dependent RNA helicase DDX28                   | 0,498538   | 0,734023   |
| 3049 | PIN4_MOUSE  | Pin4     | Peptidyl-prolyl cis-trans isomerase NIMA-interacting 4      | 2,17182    | 0,713793   |
| 3050 | SETD6_MOUSE | Setd6    | N-lysine methyltransferase SETD6                            | 1,31926    | 0,94779    |
| 3051 | RNH2A_MOUSE | Rnaseh2a | Ribonuclease H2 subunit A                                   | 0,475885   | 0,220489   |
| 3052 | RBM8A_MOUSE | Rbm8a    | RNA-binding protein 8A                                      | 0,576387   | -0,820043  |
| 3053 | SNAG_MOUSE  | Napg     | Gamma-soluble NSF attachment protein                        | 0,716157   | 0,525899   |
| 3054 | IST1_MOUSE  | Ist1     | IST1 homolog                                                | 0,395831   | -0,160492  |
| 3055 | CJ143_MOUSE |          | Uncharacterized protein C10orf143 homolog                   | 0,404084   | -0,311963  |
| 3056 | SGT1_MOUSE  | Sugt1    | Protein SGT1 homolog                                        | 0,486812   | 0,157674   |
| 3057 | PSMD8_MOUSE | Psm8     | 26S proteasome non-ATPase regulatory subunit 8              | 0,316433   | 0,187453   |
| 3058 | CYGB_MOUSE  | Cygb     | Cytoglobin                                                  | 0,151657   | 0,0912785  |
| 3059 | ROA0_MOUSE  | Hnmpa0   | Heterogeneous nuclear ribonucleoprotein A0                  | 0,700224   | -0,332498  |
| 3060 | CP2U1_MOUSE | Cyp2u1   | Cytochrome P450 2U1                                         | 0,00771043 | 0,00996475 |
| 3061 | T3HPD_MOUSE | L3hypdh  | Trans-L-3-hydroxyproline dehydratase                        | 1,44823    | 0,535605   |
| 3062 | TMED5_MOUSE | Tmed5    | Transmembrane emp24 domain-containing protein 5             | 0,844991   | 1,81035    |
| 3063 | KYNU_MOUSE  | Kynu     | Kynureninase                                                | 0,767708   | -0,744346  |

|      |             |         |                                                                             |           |            |
|------|-------------|---------|-----------------------------------------------------------------------------|-----------|------------|
| 3064 | TBC15_MOUSE | Tbc1d15 | TBC1 domain family member 15                                                | 0,371648  | -0,78484   |
| 3065 | COQ5_MOUSE  | Coq5    | 2-methoxy-6-polyprenyl-1,4-benzoquinol methylase, mitochondrial             | 0,0470292 | -0,016116  |
| 3066 | MANF_MOUSE  | Manf    | Mesencephalic astrocyte-derived neurotrophic factor                         | 2,55984   | 0,866473   |
| 3067 | SYEM_MOUSE  | Ears2   | Probable glutamate--tRNA ligase, mitochondrial                              | 0,128504  | -0,109811  |
| 3068 | ABCB8_MOUSE | Abcb8   | ATP-binding cassette sub-family B member 8, mitochondrial                   | 0,359525  | -0,586245  |
| 3069 | NIP7_MOUSE  | Nip7    | 60S ribosome subunit biogenesis protein NIP7 homolog                        | 0,989049  | 0,397232   |
| 3070 | PBLD2_MOUSE | Pbld2   | Phenazine biosynthesis-like domain-containing protein 2                     | 0,760488  | 0,482023   |
| 3071 | DHRS7_MOUSE | Dhrs7   | Dehydrogenase/reductase SDR family member 7                                 | 0,192274  | 0,605262   |
| 3072 | CENPV_MOUSE | Cenpv   | Centromere protein V                                                        | 0,535773  | 0,538649   |
| 3073 | MPPB_MOUSE  | Pmpcb   | Mitochondrial-processing peptidase subunit beta                             | 1,31135   | -0,322819  |
| 3074 | DHSD_MOUSE  | Sdhb    | Succinate dehydrogenase [ubiquinone] cytochrome b small subunit, mitochondr | 0,353742  | 0,668078   |
| 3075 | RT22_MOUSE  | Mrps22  | 28S ribosomal protein S22, mitochondrial                                    | 0,431383  | 0,139582   |
| 3076 | CYBP_MOUSE  | Cacybp  | Calcyclin-binding protein                                                   | 1,43769   | 0,593061   |
| 3077 | RL11_MOUSE  | Rpl11   | 60S ribosomal protein L11                                                   | 0,146407  | 0,047242   |
| 3078 | ILF2_MOUSE  | Ilf2    | Interleukin enhancer-binding factor 2                                       | 0,103138  | 0,0742306  |
| 3079 | NDUS4_MOUSE | Ndufs4  | NADH dehydrogenase [ubiquinone] iron-sulfur protein 4, mitochondrial        | 0,333347  | -0,18998   |
| 3080 | AHSP_MOUSE  | Ahsp    | Alpha-hemoglobin-stabilizing protein                                        | 0,262823  | -0,172865  |
| 3081 | RT28_MOUSE  | Mrps28  | 28S ribosomal protein S28, mitochondrial                                    | 0,934852  | 0,386723   |
| 3082 | TECR_MOUSE  | Tecr    | Very-long-chain enoyl-CoA reductase                                         | 0,0161109 | -0,0185425 |
| 3083 | GTPB8_MOUSE | Gtpbp8  | GTP-binding protein 8                                                       | 0,428364  | 0,22732    |
| 3084 | SSRA_MOUSE  | Ssr1    | Translocon-associated protein subunit alpha                                 | 0,0362904 | -0,0324898 |
| 3085 | CHTOP_MOUSE | Chtop   | Chromatin target of PRMT1 protein                                           | 2,66626   | 2,08366    |
| 3086 | PAIRB_MOUSE | Serbp1  | Plasminogen activator inhibitor 1 RNA-binding protein                       | 0,345168  | -0,102677  |
| 3087 | RN181_MOUSE | Rnf181  | E3 ubiquitin-protein ligase RNF181                                          | 0,898185  | 0,66977    |
| 3088 | BIEA_MOUSE  | Blvra   | Biliverdin reductase A                                                      | 0,289625  | -0,0659889 |
| 3089 | CREL2_MOUSE | Crel2   | Cysteine-rich with EGF-like domain protein 2                                | 0,917575  | 0,588742   |
| 3090 | ZCHC8_MOUSE | Zcchc8  | Zinc finger CCHC domain-containing protein 8                                | 0,862022  | 0,288486   |
| 3091 | TOM34_MOUSE | Tomm34  | Mitochondrial import receptor subunit TOM34                                 | 0,90217   | 0,244733   |
| 3092 | PXL2A_MOUSE | Pxrl2a  | Peroxisome-like 2A                                                          | 0,204953  | 0,126191   |
| 3093 | RRS1_MOUSE  | Rrs1    | Ribosome biogenesis regulatory protein homolog                              | 1,47423   | 0,563902   |
| 3094 | LUC7L_MOUSE | Luc7l   | Putative RNA-binding protein Luc7-like 1                                    | 0,476271  | 0,308821   |
| 3095 | SYWM_MOUSE  | Wars2   | Tryptophan--tRNA ligase, mitochondrial                                      | 0,253735  | 0,137398   |
| 3096 | SPCS2_MOUSE | Spcs2   | Signal peptidase complex subunit 2                                          | 0,109783  | 0,0670372  |
| 3097 | SSBP_MOUSE  | Ssbp1   | Single-stranded DNA-binding protein, mitochondrial                          | 0,668037  | 0,262398   |
| 3098 | AGM1_MOUSE  | Pgm3    | Phosphoacetylglucosamine mutase                                             | 0,823838  | 0,536994   |
| 3099 | CB072_MOUSE |         | Uncharacterized protein C2orf72 homolog                                     | 0,640749  | 0,218247   |
| 3100 | TM135_MOUSE | Tmem135 | Transmembrane protein 135                                                   | 0,136681  | 0,103483   |
| 3101 | HDHD3_MOUSE | Hdhd3   | Haloacid dehalogenase-like hydrolase domain-containing protein 3            | 0,36304   | 0,181342   |
| 3102 | TPD54_MOUSE | Tpd52l2 | Tumor protein D54                                                           | 0,0365818 | 0,0319557  |
| 3103 | REX1B_MOUSE | Rex1bd  | Required for excision 1-B domain-containing protein                         | 2,37478   | 1,29121    |
| 3104 | CSN7A_MOUSE | Cops7a  | COP9 signalosome complex subunit 7a                                         | 0,15811   | -0,285129  |
| 3105 | QCR1_MOUSE  | Uqcrc1  | Cytochrome b-c1 complex subunit 1, mitochondrial                            | 0,123991  | -0,137682  |
| 3106 | OLA1_MOUSE  | Ola1    | Obg-like ATPase 1                                                           | 0,499019  | 0,233215   |
| 3107 | NNRD_MOUSE  | Naxd    | ATP-dependent (S)-NAD(P)H-hydrate dehydratase                               | 0,308971  | 0,124687   |
| 3108 | NSF1C_MOUSE | Nsf1c   | NSFL1 cofactor p47                                                          | 0,583844  | 0,33171    |
| 3109 | RM55_MOUSE  | Mrpl55  | 39S ribosomal protein L55, mitochondrial                                    | 0,0999021 | 0,0433929  |
| 3110 | GARS_MOUSE  | Gars    | Glycine--tRNA ligase                                                        | 0,47268   | 0,13581    |
| 3111 | IF3M_MOUSE  | Mtif3   | Translation initiation factor IF-3, mitochondrial                           | 1,009     | 0,518348   |
| 3112 | PSMG3_MOUSE | Psmg3   | Proteasome assembly chaperone 3                                             | 0,206644  | 0,173025   |
| 3113 | HS12B_MOUSE | Hspa12b | Heat shock 70 kDa protein 12B                                               | 0,487899  | -0,333621  |
| 3114 | PHS2_MOUSE  | Pcbd2   | Pterin-4-alpha-carbinolamine dehydratase 2                                  | 0,123474  | -0,107612  |
| 3115 | RL15_MOUSE  | Rpl15   | 60S ribosomal protein L15                                                   | 1,25049   | 0,352262   |

|      |             |           |                                                                            |            |             |
|------|-------------|-----------|----------------------------------------------------------------------------|------------|-------------|
| 3116 | GLYM_MOUSE  | Shmt2     | Serine hydroxymethyltransferase, mitochondrial                             | 0,136258   | 0,104391    |
| 3117 | NALD2_MOUSE | Naalad2   | N-acetylated-alpha-linked acidic dipeptidase 2                             | 0,303671   | -0,220543   |
| 3118 | EFTS_MOUSE  | Tsfm      | Elongation factor Ts, mitochondrial                                        | 1,19473    | 0,383027    |
| 3119 | AL1B1_MOUSE | Aldh1b1   | Aldehyde dehydrogenase X, mitochondrial                                    | 0,257063   | -0,199332   |
| 3120 | CMS1_MOUSE  | Cmss1     | Protein CMSS1                                                              | 0,407103   | 0,24029     |
| 3121 | MTREX_MOUSE | Mtrex     | Exosome RNA helicase MTR4                                                  | 0,224604   | 0,16221     |
| 3122 | ERAL1_MOUSE | Eral1     | GTPase Era, mitochondrial                                                  | 0,386937   | -0,37612    |
| 3123 | CISY_MOUSE  | Cs        | Citrate synthase, mitochondrial                                            | 0,499342   | -0,241584   |
| 3124 | TOM70_MOUSE | Tomm70    | Mitochondrial import receptor subunit TOM70                                | 0,29378    | 0,15303     |
| 3125 | ELP3_MOUSE  | Elp3      | Elongator complex protein 3                                                | 0,653376   | 0,240352    |
| 3126 | RS19_MOUSE  | Rps19     | 40S ribosomal protein S19                                                  | 0,0999217  | 0,0317184   |
| 3127 | 5NT3A_MOUSE | Nt5c3a    | Cytosolic 5'-nucleotidase 3A                                               | 0,219473   | 0,199269    |
| 3128 | MPC2_MOUSE  | Mpc2      | Mitochondrial pyruvate carrier 2                                           | 0,872499   | -0,672156   |
| 3129 | CCD47_MOUSE | Ccdc47    | Coiled-coil domain-containing protein 47                                   | 0,180993   | 0,0926632   |
| 3130 | ODPB_MOUSE  | Pdjb      | Pyruvate dehydrogenase E1 component subunit beta, mitochondrial            | 0,483254   | 0,262476    |
| 3131 | ACBD6_MOUSE | Acbd6     | Acyl-CoA-binding domain-containing protein 6                               | 1,20238    | 0,733465    |
| 3132 | ARPIN_MOUSE | Arpin     | Arpin                                                                      | 0,00640611 | 0,00295334  |
| 3133 | SRSF9_MOUSE | Srsf9     | Serine/arginine-rich splicing factor 9                                     | 0,0474382  | -0,0360458  |
| 3134 | TSTD3_MOUSE | Tstd3     | Thiosulfate sulfurtransferase/rhodanese-like domain-containing protein 3   | 0,406874   | -0,236328   |
| 3135 | PBDC1_MOUSE | Pbdc1     | Protein PBDC1                                                              | 0,0618023  | 0,0357964   |
| 3136 | TRM5_MOUSE  | Trmt5     | tRNA (guanine(37)-N1)-methyltransferase                                    | 0,133905   | -0,097514   |
| 3137 | PAPD1_MOUSE | Mtpap     | Poly(A) RNA polymerase, mitochondrial                                      | 0,00407143 | -0,00318871 |
| 3138 | T2EA_MOUSE  | Gtf2e1    | General transcription factor IIE subunit 1                                 | 0,127469   | 0,0438919   |
| 3139 | HNRPM_MOUSE | Hnrmpm    | Heterogeneous nuclear ribonucleoprotein M                                  | 0,526587   | 0,378607    |
| 3140 | LMAN1_MOUSE | Lman1     | Protein ERGIC-53                                                           | 1,5415     | 0,520318    |
| 3141 | RFC5_MOUSE  | Rfc5      | Replication factor C subunit 5                                             | 0,835862   | 1,39429     |
| 3142 | PGM1_MOUSE  | Pgm1      | Phosphoglucomutase-1                                                       | 0,212143   | -0,0703674  |
| 3143 | RT30_MOUSE  | Mrps30    | 28S ribosomal protein S30, mitochondrial                                   | 0,777004   | -0,278422   |
| 3144 | STX17_MOUSE | Stx17     | Syntaxin-17                                                                | 0,192478   | -0,44768    |
| 3145 | MRT4_MOUSE  | Mrt4      | mRNA turnover protein 4 homolog                                            | 0,276495   | -0,187772   |
| 3146 | SYRC_MOUSE  | Rars      | Arginine--tRNA ligase, cytoplasmic                                         | 1,50002    | 0,548258    |
| 3147 | PTMS_MOUSE  | Ptms      | Parathyromosin                                                             | 1,05825    | -0,505001   |
| 3148 | SCOT1_MOUSE | Oxct1     | Succinyl-CoA:3-ketoacid coenzyme A transferase 1, mitochondrial            | 0,695792   | -0,432819   |
| 3149 | MCES_MOUSE  | Rnmt      | mRNA cap guanine-N7 methyltransferase                                      | 1,01794    | 0,208901    |
| 3150 | KPRA_MOUSE  | Prpsap1   | Phosphoribosyl pyrophosphate synthase-associated protein 1                 | 1,53659    | 0,418174    |
| 3151 | CY1_MOUSE   | Cyc1      | Cytochrome c1, heme protein, mitochondrial                                 | 0,150071   | -0,120078   |
| 3152 | DYL2_MOUSE  | Dynl2     | Dynein light chain 2, cytoplasmic                                          | 0,0802944  | 0,166827    |
| 3153 | RM45_MOUSE  | Mrpl45    | 39S ribosomal protein L45, mitochondrial                                   | 0,285335   | 0,171055    |
| 3154 | SYTC_MOUSE  | Tars      | Threonine--tRNA ligase, cytoplasmic                                        | 0,2603     | 0,19886     |
| 3155 | DDX56_MOUSE | Ddx56     | Probable ATP-dependent RNA helicase DDX56                                  | 1,53076    | 1,08401     |
| 3156 | HINT2_MOUSE | Hint2     | Histidine triad nucleotide-binding protein 2, mitochondrial                | 0,581501   | 0,217753    |
| 3157 | NH2L1_MOUSE | Snu13     | NHP2-like protein 1                                                        | 0,176194   | 0,0855991   |
| 3158 | DUS12_MOUSE | Dusp12    | Dual specificity protein phosphatase 12                                    | 0,681031   | 1,04797     |
| 3159 | MTHFS_MOUSE | Mthfs     | 5-formyltetrahydrofolate cyclo-ligase                                      | 0,484219   | -0,233985   |
| 3160 | RT25_MOUSE  | Mrps25    | 28S ribosomal protein S25, mitochondrial                                   | 0,917454   | 0,279792    |
| 3161 | ILEUA_MOUSE | Serpinb1a | Leukocyte elastase inhibitor A                                             | 0,213106   | -0,12339    |
| 3162 | INT12_MOUSE | Ints12    | Integrator complex subunit 12                                              | 1,00341    | 1,26795     |
| 3163 | GAL3A_MOUSE | Gatd3a    | Glutamine amidotransferase-like class 1 domain-containing protein 3A, mito | 1,32828    | 0,372562    |
| 3164 | CNDP2_MOUSE | Cndp2     | Cytosolic non-specific dipeptidase                                         | 0,97157    | 0,704633    |
| 3165 | RM28_MOUSE  | Mrpl28    | 39S ribosomal protein L28, mitochondrial                                   | 0,693225   | 0,268923    |
| 3166 | VPS28_MOUSE | Vps28     | Vacuolar protein sorting-associated protein 28 homolog                     | 0,0369639  | 0,0256382   |
| 3167 | TMEDA_MOUSE | Tmed10    | Transmembrane emp24 domain-containing protein 10                           | 0,336741   | 0,209681    |

|      |             |          |                                                                              |            |             |
|------|-------------|----------|------------------------------------------------------------------------------|------------|-------------|
| 3168 | TBCB_MOUSE  | Tbcb     | Tubulin-folding cofactor B                                                   | 0,0433858  | -0,0211899  |
| 3169 | AKTS1_MOUSE | Akt1s1   | Proline-rich AKT1 substrate 1                                                | 2,03457    | 0,442278    |
| 3170 | RAB1B_MOUSE | Rab1b    | Ras-related protein Rab-1B                                                   | 0,392276   | 0,166418    |
| 3171 | PMVK_MOUSE  | Pmvk     | Phosphomevalonate kinase                                                     | 0,335214   | 0,591121    |
| 3172 | NDUF4_MOUSE | Ndufaf4  | NADH dehydrogenase [ubiquinone] 1 alpha subcomplex assembly factor 4         | 0,605716   | 0,363332    |
| 3173 | RM53_MOUSE  | Mrpl53   | 39S ribosomal protein L53, mitochondrial                                     | 0,494878   | -0,256906   |
| 3174 | MCEE_MOUSE  | Mcee     | Methylmalonyl-CoA epimerase, mitochondrial                                   | 0,206684   | 0,244992    |
| 3175 | SARNP_MOUSE | Samp     | SAP domain-containing ribonucleoprotein                                      | 1,09132    | 0,302116    |
| 3176 | VATF_MOUSE  | Atp6v1f  | V-type proton ATPase subunit F                                               | 0,591597   | 0,422753    |
| 3177 | CHCH2_MOUSE | Chchd2   | Coiled-coil-helix-coiled-coil-helix domain-containing protein 2              | 0,229894   | 0,144785    |
| 3178 | SEC13_MOUSE | Sec13    | Protein SEC13 homolog                                                        | 0,120723   | -0,0578941  |
| 3179 | MCA3_MOUSE  | Eef1e1   | Eukaryotic translation elongation factor 1 epsilon-1                         | 0,100837   | -0,114325   |
| 3180 | FKB11_MOUSE | Fkbp11   | Peptidyl-prolyl cis-trans isomerase FKBP11                                   | 0,184483   | 0,104688    |
| 3181 | RM21_MOUSE  | Mrpl21   | 39S ribosomal protein L21, mitochondrial                                     | 0,857643   | 0,300531    |
| 3182 | RM13_MOUSE  | Mrpl13   | 39S ribosomal protein L13, mitochondrial                                     | 0,86307    | -0,19013    |
| 3183 | CHRD1_MOUSE | Chordc1  | Cysteine and histidine-rich domain-containing protein 1                      | 1,381      | 0,659108    |
| 3184 | MPH6_MOUSE  | Mphosph6 | M-phase phosphoprotein 6                                                     | 0,438121   | -0,388823   |
| 3185 | ERP44_MOUSE | Erp44    | Endoplasmic reticulum resident protein 44                                    | 1,66236    | 0,512495    |
| 3186 | RL34_MOUSE  | Rpl34    | 60S ribosomal protein L34                                                    | 0,0616183  | 0,0219467   |
| 3187 | MMAB_MOUSE  | Mmab     | Corrinoid adenosyltransferase                                                | 0,412079   | -0,149883   |
| 3188 | NXP20_MOUSE | Fam114a1 | Protein Noxp20                                                               | 1,94247    | 0,593818    |
| 3189 | SPF27_MOUSE | Bcas2    | Pre-mRNA-splicing factor SPF27                                               | 0,0584355  | -0,0389454  |
| 3190 | TOE1_MOUSE  | Toe1     | Target of EGR1 protein 1                                                     | 0,635766   | -0,562309   |
| 3191 | ODO2_MOUSE  | Dist     | Dihydropyridyllysine-residue succinyltransferase component of 2-oxoglutarate | 0,282693   | 0,132235    |
| 3192 | UB2V2_MOUSE | Ube2v2   | Ubiquitin-conjugating enzyme E2 variant 2                                    | 0,00191182 | -0,00062027 |
| 3193 | VP33A_MOUSE | Vps33a   | Vacuolar protein sorting-associated protein 33A                              | 1,16055    | 1,1039      |
| 3194 | AACS_MOUSE  | Aacs     | Acetoacetyl-CoA synthetase                                                   | 0,011989   | -0,0265583  |
| 3195 | COA3_MOUSE  | Coa3     | Cytochrome c oxidase assembly factor 3 homolog, mitochondrial                | 0,0714432  | -0,0326885  |
| 3196 | CORO7_MOUSE | Coro7    | Coronin-7                                                                    | 0,479548   | 0,330099    |
| 3197 | K1C20_MOUSE | Krt20    | Keratin, type I cytoskeletal 20                                              | 1,6786     | -0,915665   |
| 3198 | RM19_MOUSE  | Mrpl19   | 39S ribosomal protein L19, mitochondrial                                     | 0,384128   | 0,0966911   |
| 3199 | PPAC_MOUSE  | Acp1     | Low molecular weight phosphotyrosine protein phosphatase                     | 0,749074   | 0,852164    |
| 3200 | HYEP_MOUSE  | Ephx1    | Epoxide hydrolase 1                                                          | 1,63198    | 1,04018     |
| 3201 | RUFY3_MOUSE | Rufy3    | Protein RUFY3                                                                | 0,95234    | 0,347061    |
| 3202 | ATPD_MOUSE  | Atp5f1d  | ATP synthase subunit delta, mitochondrial                                    | 0,759583   | 1,02993     |
| 3203 | STAG1_MOUSE | Stag1    | Cohesin subunit SA-1                                                         | 0,453631   | -0,194468   |
| 3204 | OXSM_MOUSE  | Oxsm     | 3-oxoacyl-[acyl-carrier-protein] synthase, mitochondrial                     | 0,573009   | -0,357651   |
| 3205 | EXOC2_MOUSE | Exoc2    | Exocyst complex component 2                                                  | 0,190681   | 0,0947956   |
| 3206 | GCC1_MOUSE  | Gcc1     | GRIP and coiled-coil domain-containing protein 1                             | 0,00549381 | 0,00347328  |
| 3207 | CUL2_MOUSE  | Cul2     | Cullin-2                                                                     | 1,70075    | 0,362568    |
| 3208 | RABL3_MOUSE | Rab13    | Rab-like protein 3                                                           | 0,594496   | 0,151075    |
| 3209 | SF3A3_MOUSE | Sf3a3    | Splicing factor 3A subunit 3                                                 | 0,316341   | -0,118917   |
| 3210 | SHPK_MOUSE  | Shpk     | Sedoheptulokinase                                                            | 0,0546476  | 0,0310555   |
| 3211 | WDR20_MOUSE | Wdr20    | WD repeat-containing protein 20                                              | 0,540241   | 0,854868    |
| 3212 | ATAD1_MOUSE | Atad1    | ATPase family AAA domain-containing protein 1                                | 0,19674    | 0,238572    |
| 3213 | CUL5_MOUSE  | Cul5     | Cullin-5                                                                     | 0,342936   | 0,15665     |
| 3214 | SYAP1_MOUSE | Syap1    | Synapse-associated protein 1                                                 | 0,707876   | 0,277859    |
| 3215 | SC23B_MOUSE | Sec23b   | Protein transport protein Sec23B                                             | 0,731507   | 0,434314    |
| 3216 | D42E1_MOUSE | Sdr42e1  | Short-chain dehydrogenase/reductase family 42E member 1                      | 0,167105   | 0,226141    |
| 3217 | NDUV2_MOUSE | Ndufv2   | NADH dehydrogenase [ubiquinone] flavoprotein 2, mitochondrial                | 0,667985   | -0,428911   |
| 3218 | SYJ2B_MOUSE | Synj2bp  | Synaptojanin-2-binding protein                                               | 0,323919   | 0,115182    |
| 3219 | GHC1_MOUSE  | Slc25a22 | Mitochondrial glutamate carrier 1                                            | 0,0229642  | -0,0261375  |

|      |             |         |                                                                         |           |             |
|------|-------------|---------|-------------------------------------------------------------------------|-----------|-------------|
| 3220 | NC2A_MOUSE  | Drap1   | Dr1-associated corepressor                                              | 0,0790139 | -0,0309521  |
| 3221 | IDH3A_MOUSE | Idh3a   | Isocitrate dehydrogenase [NAD] subunit alpha, mitochondrial             | 0,157539  | -0,130475   |
| 3222 | NOSIP_MOUSE | Nosip   | Nitric oxide synthase-interacting protein                               | 0,481599  | 0,491455    |
| 3223 | F162A_MOUSE | Fam162a | Protein FAM162A                                                         | 0,90146   | 0,259869    |
| 3224 | BORC6_MOUSE | Borcs6  | BLOC-1-related complex subunit 6                                        | 0,571432  | 0,261064    |
| 3225 | MSRA_MOUSE  | Msra    | Mitochondrial peptide methionine sulfoxide reductase                    | 0,0524263 | -0,00995598 |
| 3226 | GLGB_MOUSE  | Gbe1    | 1,4-alpha-glucan-branching enzyme                                       | 0,659656  | 0,436972    |
| 3227 | ALKB7_MOUSE | Alkbh7  | Alpha-ketoglutarate-dependent dioxygenase alkB homolog 7, mitochondrial | 1,01811   | 0,673915    |
| 3228 | NOP56_MOUSE | Nop56   | Nucleolar protein 56                                                    | 0,560396  | 0,139097    |
| 3229 | TMX2_MOUSE  | Tmx2    | Thioredoxin-related transmembrane protein 2                             | 0,181267  | -0,12027    |
| 3230 | PIR_MOUSE   | Pir     | Pirin                                                                   | 0,424365  | 0,283353    |
| 3231 | CF226_MOUSE |         | Uncharacterized protein C6orf226 homolog                                | 1,18066   | 0,524715    |
| 3232 | TRIR_MOUSE  | Trir    | Telomerase RNA component interacting RNase                              | 0,118481  | -0,218983   |
| 3233 | EXOS8_MOUSE | Exosc8  | Exosome complex component RRP43                                         | 0,155796  | -0,271322   |
| 3234 | RM02_MOUSE  | Mrpl2   | 39S ribosomal protein L2, mitochondrial                                 | 0,575327  | 0,276425    |
| 3235 | PPIL2_MOUSE | Ppil2   | RING-type E3 ubiquitin-protein ligase PPIL2                             | 0,165046  | 0,179698    |
| 3236 | SRP19_MOUSE | Srp19   | Signal recognition particle 19 kDa protein                              | 0,0415599 | 0,0453522   |
| 3237 | ARMC1_MOUSE | Armcl   | Armadillo repeat-containing protein 1                                   | 0,940566  | 0,473769    |
| 3238 | ACAD8_MOUSE | Acad8   | Isobutyryl-CoA dehydrogenase, mitochondrial                             | 0,837672  | 0,138392    |
| 3239 | OVCA2_MOUSE | Ovca2   | Esterase OVCA2                                                          | 0,640323  | 0,998449    |
| 3240 | PRPS1_MOUSE | Prps1   | Ribose-phosphate pyrophosphokinase 1                                    | 0,368891  | -0,188517   |
| 3241 | RTCA_MOUSE  | RtcA    | RNA 3'-terminal phosphate cyclase                                       | 0,0251332 | 0,031509    |
| 3242 | LHPP_MOUSE  | Lhpp    | Phospholysine phosphohistidine inorganic pyrophosphate phosphatase      | 0,887452  | -0,343359   |
| 3243 | COX20_MOUSE | Cox20   | Cytochrome c oxidase assembly protein COX20, mitochondrial              | 0,457334  | 0,342605    |
| 3244 | ECHD3_MOUSE | Echdc3  | Enoyl-CoA hydratase domain-containing protein 3, mitochondrial          | 1,15603   | -0,402093   |
| 3245 | RT09_MOUSE  | Mrps9   | 28S ribosomal protein S9, mitochondrial                                 | 1,38856   | 0,482811    |
| 3246 | RM30_MOUSE  | Mrpl30  | 39S ribosomal protein L30, mitochondrial                                | 0,0764264 | -0,0404869  |
| 3247 | APMAP_MOUSE | Apmmap  | Adipocyte plasma membrane-associated protein                            | 0,17074   | -0,154018   |
| 3248 | ISCU_MOUSE  | Iscu    | Iron-sulfur cluster assembly enzyme ISCU, mitochondrial                 | 0,381663  | -0,503275   |
| 3249 | RL22L_MOUSE | Rpl22l1 | 60S ribosomal protein L22-like 1                                        | 0,506081  | -0,471292   |
| 3250 | MED8_MOUSE  | Med8    | Mediator of RNA polymerase II transcription subunit 8                   | 1,11442   | 0,996725    |
| 3251 | GGCT_MOUSE  | Ggct    | Gamma-glutamylcyclotransferase                                          | 0,20041   | 0,105127    |
| 3252 | IPYR_MOUSE  | Ppa1    | Inorganic pyrophosphatase                                               | 0,806809  | 0,234488    |
| 3253 | PRXD1_MOUSE | Prorsd1 | Prolyl-tRNA synthetase associated domain-containing protein 1           | 1,79708   | 0,532334    |
| 3254 | RL37_MOUSE  | Rpl37   | 60S ribosomal protein L37                                               | 1,20645   | 0,563623    |
| 3255 | SOX_MOUSE   | Pipox   | Peroxisomal sarcosine oxidase                                           | 0,77408   | 0,30884     |
| 3256 | DNJB4_MOUSE | Dnajb4  | DnaJ homolog subfamily B member 4                                       | 0,824246  | 0,430097    |
| 3257 | QCR7_MOUSE  | Uqcrb   | Cytochrome b-c1 complex subunit 7                                       | 0,758896  | 0,573188    |
| 3258 | PPIH_MOUSE  | Ppih    | Peptidyl-prolyl cis-trans isomerase H                                   | 1,40337   | 0,457702    |
| 3259 | TIM50_MOUSE | Timm50  | Mitochondrial import inner membrane translocase subunit TIM50           | 1,13175   | -0,399822   |
| 3260 | U2AF1_MOUSE | U2af1   | Splicing factor U2AF 35 kDa subunit                                     | 0,490573  | 0,842188    |
| 3261 | ITPA_MOUSE  | Itpa    | Inosine triphosphate pyrophosphatase                                    | 0,520604  | 0,276025    |
| 3262 | ARPSL_MOUSE | Arpc5l  | Actin-related protein 2/3 complex subunit 5-like protein                | 0,665641  | 0,3855      |
| 3263 | CHM4B_MOUSE | Chmp4b  | Charged multivesicular body protein 4b                                  | 0,183679  | 0,161582    |
| 3264 | NDUAB_MOUSE | Ndufa11 | NADH dehydrogenase [ubiquinone] 1 alpha subcomplex subunit 11           | 0,0142919 | 0,0100376   |
| 3265 | IN35_MOUSE  | Ifi35   | Interferon-induced 35 kDa protein homolog                               | 0,609251  | 0,642086    |
| 3266 | RL4_MOUSE   | Rpl4    | 60S ribosomal protein L4                                                | 0,941883  | 0,731295    |
| 3267 | EF1G_MOUSE  | Eef1g   | Elongation factor 1-gamma                                               | 0,469175  | 0,240144    |
| 3268 | RM17_MOUSE  | Mrpl17  | 39S ribosomal protein L17, mitochondrial                                | 0,805341  | 0,472342    |
| 3269 | ARFG3_MOUSE | Arfgap3 | ADP-ribosylation factor GTPase-activating protein 3                     | 0,460076  | 0,589906    |
| 3270 | ORN_MOUSE   | Rexo2   | Oligoribonuclease, mitochondrial                                        | 1,10186   | -0,504099   |
| 3271 | BOLA1_MOUSE | Bola1   | BolA-like protein 1                                                     | 0,93963   | 0,315418    |

|      |             |         |                                                                          |           |            |
|------|-------------|---------|--------------------------------------------------------------------------|-----------|------------|
| 3272 | GSDMD_MOUSE | Gsdmdc1 | Gasdermin-D                                                              | 0,280414  | -0,120295  |
| 3273 | SLIRP_MOUSE | Slirp   | SRA stem-loop-interacting RNA-binding protein, mitochondrial             | 0,28239   | 0,137616   |
| 3274 | SNX5_MOUSE  | Snx5    | Sorting nexin-5                                                          | 0,189207  | 0,111529   |
| 3275 | PSD12_MOUSE | Psm12   | 26S proteasome non-ATPase regulatory subunit 12                          | 0,288493  | -0,274626  |
| 3276 | OCAD2_MOUSE | Ociad2  | OCIA domain-containing protein 2                                         | 1,48509   | 0,585347   |
| 3277 | CUTC_MOUSE  | Cutc    | Copper homeostasis protein cutC homolog                                  | 1,28957   | 0,901056   |
| 3278 | CC124_MOUSE | Ccdc124 | Coiled-coil domain-containing protein 124                                | 1,12926   | 0,675018   |
| 3279 | EFHD2_MOUSE | Efhd2   | EF-hand domain-containing protein D2                                     | 0,148721  | -0,0950146 |
| 3280 | ASCC1_MOUSE | Ascc1   | Activating signal cointegrator 1 complex subunit 1                       | 1,55343   | -0,932485  |
| 3281 | ATGA1_MOUSE | Atg101  | Autophagy-related protein 101                                            | 1,70475   | 0,710223   |
| 3282 | ATG7_MOUSE  | Atg7    | Ubiquitin-like modifier-activating enzyme ATG7                           | 0,600527  | 0,274026   |
| 3283 | ST1C2_MOUSE | Sult1c2 | Sulfotransferase 1C2                                                     | 0,211199  | 0,139217   |
| 3284 | GATM_MOUSE  | Gatm    | Glycine amidinotransferase, mitochondrial                                | 1,33214   | 0,28775    |
| 3285 | ECHD1_MOUSE | Echdc1  | Ethylmalonyl-CoA decarboxylase                                           | 0,156748  | 0,148378   |
| 3286 | DDI1_MOUSE  | Ddi1    | Protein DDI1 homolog 1                                                   | 0,64122   | 0,276029   |
| 3287 | PHP14_MOUSE | Phpt1   | 14 kDa phosphohistidine phosphatase                                      | 0,537736  | -0,260129  |
| 3288 | DCPS_MOUSE  | Dcps    | m7GpppX diphosphatase                                                    | 0,967179  | -0,278422  |
| 3289 | GBG12_MOUSE | Gng12   | Guanine nucleotide-binding protein G(I)/G(S)/G(O) subunit gamma-12       | 2,02297   | 0,425973   |
| 3290 | MTU1_MOUSE  | Trmu    | Mitochondrial tRNA-specific 2-thiouridylase 1                            | 0,0202787 | -0,0101307 |
| 3291 | CNPY3_MOUSE | Cnpy3   | Protein canopy homolog 3                                                 | 1,56382   | 1,15258    |
| 3292 | PRP4_MOUSE  | Prpf4   | U4/U6 small nuclear ribonucleoprotein Prp4                               | 1,57105   | 0,492279   |
| 3293 | CNN3_MOUSE  | Cnn3    | Calponin-3                                                               | 0,241031  | 0,121421   |
| 3294 | ANCHR_MOUSE | Zfyve19 | Abscission/NoCut checkpoint regulator                                    | 1,08321   | 0,762745   |
| 3295 | SNAA_MOUSE  | Napa    | Alpha-soluble NSF attachment protein                                     | 1,6511    | 0,467672   |
| 3296 | RM12_MOUSE  | Mrpl12  | 39S ribosomal protein L12, mitochondrial                                 | 0,308659  | -0,107967  |
| 3297 | CB39L_MOUSE | Cab39l  | Calcium-binding protein 39-like                                          | 0,575027  | -0,531552  |
| 3298 | ATPO_MOUSE  | Atp5po  | ATP synthase subunit O, mitochondrial                                    | 0,0537801 | 0,0321728  |
| 3299 | PHYD1_MOUSE | Phyhd1  | Phytanoyl-CoA dioxygenase domain-containing protein 1                    | 0,248633  | 0,401542   |
| 3300 | MCTS1_MOUSE | Mcts1   | Malignant T-cell-amplified sequence 1                                    | 1,34563   | 0,426051   |
| 3301 | IAH1_MOUSE  | Iah1    | Isoamyl acetate-hydrolyzing esterase 1 homolog                           | 0,635643  | 0,555993   |
| 3302 | PHKG2_MOUSE | Phkg2   | Phosphorylase b kinase gamma catalytic chain, liver/testis isoform       | 0,504789  | 0,271702   |
| 3303 | CHM2A_MOUSE | Chmp2a  | Charged multivesicular body protein 2a                                   | 1,1326    | 0,473997   |
| 3304 | ZFPL1_MOUSE | Zfp1    | Zinc finger protein-like 1                                               | 0,827017  | 0,377651   |
| 3305 | PXL2B_MOUSE | Prxl2b  | Prostamide/prostaglandin F synthase                                      | 1,10855   | 0,714678   |
| 3306 | QCR2_MOUSE  | Uqcr2   | Cytochrome b-c1 complex subunit 2, mitochondrial                         | 0,374622  | -0,216872  |
| 3307 | TYSD1_MOUSE | Tysnd1  | Peroxisomal leader peptide-processing protease                           | 1,29341   | 0,792881   |
| 3308 | HUT1_MOUSE  | Amdhd1  | Probable imidazolonepropionase                                           | 0,010475  | 0,0061985  |
| 3309 | DHDH_MOUSE  | Dhdh    | Trans-1,2-dihydrobenzene-1,2-diol dehydrogenase                          | 0,448567  | -0,367395  |
| 3310 | CPN2_MOUSE  | Cpn2    | Carboxypeptidase N subunit 2                                             | 0,13636   | 0,0873016  |
| 3311 | SELO_MOUSE  | Selenoo | Protein adenyllyltransferase SelO, mitochondrial                         | 0,270687  | -0,294241  |
| 3312 | CMTR1_MOUSE | Cmtr1   | Cap-specific mRNA (nucleoside 2'-O-)-methyltransferase 1                 | 0,328585  | 0,241382   |
| 3313 | KAP0_MOUSE  | Prkar1a | cAMP-dependent protein kinase type I-alpha regulatory subunit            | 1,48594   | 0,687729   |
| 3314 | ICA_MOUSE   | Ica     | Inhibitor of carbonic anhydrase                                          | 1,38128   | 0,39068    |
| 3315 | PELP1_MOUSE | Pelp1   | Proline-, glutamic acid- and leucine-rich protein 1                      | 0,157045  | -0,189741  |
| 3316 | ALG2_MOUSE  | Alg2    | Alpha-1,3/1,6-mannosyltransferase ALG2                                   | 1,42537   | 0,405068   |
| 3317 | SPB1_MOUSE  | Ftsj3   | pre-rRNA 2'-O-ribose RNA methyltransferase FTSJ3                         | 1,34311   | 0,677904   |
| 3318 | AL7A1_MOUSE | Aldh7a1 | Alpha-aminoadipic semialdehyde dehydrogenase                             | 0,678962  | -0,258653  |
| 3319 | CP27A_MOUSE | Cyp27a1 | Sterol 26-hydroxylase, mitochondrial                                     | 0,0226128 | 0,0404713  |
| 3320 | AP2B1_MOUSE | Ap2b1   | AP-2 complex subunit beta                                                | 0,164537  | 0,138807   |
| 3321 | PLIN3_MOUSE | Plin3   | Perilipin-3                                                              | 0,255267  | 0,201094   |
| 3322 | RPN2_MOUSE  | Rpn2    | Dolichyl-diphosphooligosaccharide--protein glycosyltransferase subunit 2 | 0,233995  | -0,143409  |
| 3323 | SRPRA_MOUSE | Srpra   | Signal recognition particle receptor subunit alpha                       | 0,432225  | 0,182316   |

|      |             |          |                                                                             |           |            |
|------|-------------|----------|-----------------------------------------------------------------------------|-----------|------------|
| 3324 | WWP2_MOUSE  | Wwp2     | NEDD4-like E3 ubiquitin-protein ligase WWP2                                 | 0,219676  | 0,121574   |
| 3325 | LMAN2_MOUSE | Lman2    | Vesicular integral-membrane protein VIP36                                   | 0,296132  | -0,370378  |
| 3326 | TMPS6_MOUSE | Tmprss6  | Transmembrane protease serine 6                                             | 0,951812  | 0,943768   |
| 3327 | PGAM1_MOUSE | Pgam1    | Phosphoglycerate mutase 1                                                   | 0,363255  | -0,11555   |
| 3328 | BI2L1_MOUSE | Baiap2l1 | Brain-specific angiogenesis inhibitor 1-associated protein 2-like protein 1 | 0,502342  | 0,193566   |
| 3329 | ACO12_MOUSE | Acot12   | Acetyl-coenzyme A thioesterase                                              | 0,362026  | 0,307811   |
| 3330 | ACDSB_MOUSE | Acadslb  | Short/branched chain specific acyl-CoA dehydrogenase, mitochondrial         | 0,0213172 | -0,0107857 |
| 3331 | GDAP2_MOUSE | Gdap2    | Ganglioside-induced differentiation-associated protein 2                    | 0,109626  | 0,0652554  |
| 3332 | COASY_MOUSE | Coasy    | Bifunctional coenzyme A synthase                                            | 1,31178   | 0,273847   |
| 3333 | ABCG8_MOUSE | Abcg8    | ATP-binding cassette sub-family G member 8                                  | 0,570163  | -0,381804  |
| 3334 | ECHP_MOUSE  | Ehhadh   | Peroxisomal bifunctional enzyme                                             | 1,58338   | 1,25259    |
| 3335 | LONP2_MOUSE | Lonp2    | Lon protease homolog 2, peroxisomal                                         | 2,1776    | 0,745652   |
| 3336 | KCY_MOUSE   | Cmpk1    | UMP-CMP kinase                                                              | 0,0740153 | 0,045985   |
| 3337 | AKAP8_MOUSE | Akap8    | A-kinase anchor protein 8                                                   | 0,0600543 | 0,0593472  |
| 3338 | XRN2_MOUSE  | Xrn2     | 5'-3' exoribonuclease 2                                                     | 0,546032  | -0,190981  |
| 3339 | MYPT1_MOUSE | Ppp1r12a | Protein phosphatase 1 regulatory subunit 12A                                | 0,577748  | 0,353749   |
| 3340 | TMM43_MOUSE | Tmem43   | Transmembrane protein 43                                                    | 0,659573  | 0,55016    |
| 3341 | TPRGL_MOUSE | Tprgl1   | Tumor protein p63-regulated gene 1-like protein                             | 0,415924  | 0,238266   |
| 3342 | KLC4_MOUSE  | Klc4     | Kinesin light chain 4                                                       | 0,146728  | 0,0454594  |
| 3343 | AMPD2_MOUSE | Ampd2    | AMP deaminase 2                                                             | 0,785469  | 0,54917    |
| 3344 | M2GD_MOUSE  | Dmgdh    | Dimethylglycine dehydrogenase, mitochondrial                                | 0,461684  | 0,290887   |
| 3345 | CP4V2_MOUSE | Cyp4v2   | Cytochrome P450 4V2                                                         | 0,870051  | 0,473322   |
| 3346 | PHLP_MOUSE  | Pdcl     | Phosducin-like protein                                                      | 0,51627   | -1,05952   |
| 3347 | SYVN1_MOUSE | Syvn1    | E3 ubiquitin-protein ligase synoviolin                                      | 0,851125  | 0,764727   |
| 3348 | NVL_MOUSE   | Nvl      | Nuclear valosin-containing protein-like                                     | 0,955596  | 0,449198   |
| 3349 | IKIP_MOUSE  | Ikbip    | Inhibitor of nuclear factor kappa-B kinase-interacting protein              | 0,79827   | 0,729555   |
| 3350 | ERG11_MOUSE | Ergic1   | Endoplasmic reticulum-Golgi intermediate compartment protein 1              | 0,327219  | 0,0867889  |
| 3351 | DJC10_MOUSE | Dnajc10  | DnaJ homolog subfamily C member 10                                          | 0,920284  | 0,630971   |
| 3352 | KC1D_MOUSE  | Csnk1d   | Casein kinase I isoform delta                                               | 0,179284  | 0,147754   |
| 3353 | PRP17_MOUSE | Cdc40    | Pre-mRNA-processing factor 17                                               | 1,31966   | 0,371184   |
| 3354 | OCTC_MOUSE  | Crot     | Peroxisomal carnitine O-octanoyltransferase                                 | 0,668793  | 0,536782   |
| 3355 | GNAI3_MOUSE | Gnai3    | Guanine nucleotide-binding protein G(i) subunit alpha                       | 0,135675  | 0,087941   |
| 3356 | MPPA_MOUSE  | Pmpca    | Mitochondrial-processing peptidase subunit alpha                            | 0,661784  | 0,292402   |
| 3357 | NDUA9_MOUSE | Ndufa9   | NADH dehydrogenase [ubiquinone] 1 alpha subcomplex subunit 9, mitochondr    | 0,307429  | -0,132618  |
| 3358 | NDUS7_MOUSE | Ndufs7   | NADH dehydrogenase [ubiquinone] iron-sulfur protein 7, mitochondrial        | 0,141413  | -0,0999138 |
| 3359 | RT15_MOUSE  | Mrps15   | 28S ribosomal protein S15, mitochondrial                                    | 1,263     | 0,472221   |
| 3360 | RT11_MOUSE  | Mrps11   | 28S ribosomal protein S11, mitochondrial                                    | 0,405627  | 0,425813   |
| 3361 | ISCA2_MOUSE | Isca2    | Iron-sulfur cluster assembly 2 homolog, mitochondrial                       | 0,241536  | 0,155876   |
| 3362 | P5CR3_MOUSE | Pycr3    | Pyrroline-5-carboxylate reductase 3                                         | 1,51737   | 0,638118   |
| 3363 | ISC2B_MOUSE | Isoc2b   | Isochorismatase domain-containing protein 2B                                | 0,288252  | 0,225966   |
| 3364 | TOM20_MOUSE | Tomm20   | Mitochondrial import receptor subunit TOM20 homolog                         | 0,874505  | -1,19126   |
| 3365 | 6PGD_MOUSE  | Pgd      | 6-phosphogluconate dehydrogenase, decarboxylating                           | 0,68327   | 0,328265   |
| 3366 | SYF1_MOUSE  | Xab2     | Pre-mRNA-splicing factor SYF1                                               | 0,24176   | 0,112762   |
| 3367 | PK1IP_MOUSE | Pak1ip1  | p21-activated protein kinase-interacting protein 1                          | 0,140117  | 0,102641   |
| 3368 | SSRG_MOUSE  | Ssr3     | Translocon-associated protein subunit gamma                                 | 0,0433394 | 0,0358173  |
| 3369 | PBLD1_MOUSE | Pbld1    | Phenazine biosynthesis-like domain-containing protein 1                     | 0,657477  | 0,485455   |
| 3370 | TR112_MOUSE | Trmt112  | Multifunctional methyltransferase subunit TRM112-like protein               | 0,0807215 | -0,0422596 |
| 3371 | EIF3F_MOUSE | Eif3f    | Eukaryotic translation initiation factor 3 subunit F                        | 0,149215  | 0,109229   |
| 3372 | LST8_MOUSE  | Mlst8    | Target of rapamycin complex subunit LST8                                    | 1,57853   | 0,442486   |
| 3373 | NDUA8_MOUSE | Ndufa8   | NADH dehydrogenase [ubiquinone] 1 alpha subcomplex subunit 8                | 0,176108  | -0,104821  |
| 3374 | NPL_MOUSE   | Npl      | N-acetylneuraminate lyase                                                   | 0,445406  | -0,215714  |
| 3375 | MET15_MOUSE | Mettl15  | Probable methyltransferase-like protein 15                                  | 0,211203  | 0,198206   |



|      |             |          |                                                                      |            |             |
|------|-------------|----------|----------------------------------------------------------------------|------------|-------------|
| 3376 | PUR6_MOUSE  | Paics    | Multifunctional protein ADE2                                         | 0,93066    | -0,369893   |
| 3377 | ETHE1_MOUSE | Ethe1    | Persulfide dioxygenase ETHE1, mitochondrial                          | 0,499834   | -0,169765   |
| 3378 | GSTK1_MOUSE | Gstk1    | Glutathione S-transferase kappa 1                                    | 0,0932969  | -0,08708    |
| 3379 | NUD12_MOUSE | Nudt12   | Peroxisomal NADH pyrophosphatase NUDT12                              | 2,14497    | 0,469017    |
| 3380 | NB5R3_MOUSE | Cyb5r3   | NADH-cytochrome b5 reductase 3                                       | 0,573781   | 0,415266    |
| 3381 | ASPD_MOUSE  | Aspdh    | Putative L-aspartate dehydrogenase                                   | 0,88294    | 0,391544    |
| 3382 | MTL26_MOUSE | Mettl26  | Methyltransferase-like 26                                            | 0,345282   | 0,226736    |
| 3383 | MECR_MOUSE  | Mecr     | Enoyl-[acyl-carrier-protein] reductase, mitochondrial                | 0,482509   | 0,131243    |
| 3384 | NDUBA_MOUSE | Ndufb10  | NADH dehydrogenase [ubiquinone] 1 beta subcomplex subunit 10         | 0,0726943  | -0,0484322  |
| 3385 | AKCL2_MOUSE | Akr1e2   | 1,5-anhydro-D-fructose reductase                                     | 0,955496   | -0,277024   |
| 3386 | NDUS3_MOUSE | Ndufs3   | NADH dehydrogenase [ubiquinone] iron-sulfur protein 3, mitochondrial | 0,160159   | -0,229047   |
| 3387 | SDF2_MOUSE  | Sdf2     | Stromal cell-derived factor 2                                        | 0,43714    | -0,96811    |
| 3388 | CRIP2_MOUSE | Crip2    | Cysteine-rich protein 2                                              | 0,287642   | -0,202648   |
| 3389 | RM04_MOUSE  | Mirpl4   | 39S ribosomal protein L4, mitochondrial                              | 0,208366   | -0,118393   |
| 3390 | HOGA1_MOUSE | Hoga1    | 4-hydroxy-2-oxoglutarate aldolase, mitochondrial                     | 0,30332    | 0,165727    |
| 3391 | DGAT2_MOUSE | Dgat2    | Diacylglycerol O-acyltransferase 2                                   | 0,0646165  | -0,0551239  |
| 3392 | RMD1_MOUSE  | Rmdn1    | Regulator of microtubule dynamics protein 1                          | 0,201123   | 0,1353      |
| 3393 | ETFB_MOUSE  | Etfb     | Electron transfer flavoprotein subunit beta                          | 1,0949     | 0,231752    |
| 3394 | ATP5H_MOUSE | Atp5pd   | ATP synthase subunit d, mitochondrial                                | 0,227455   | 0,163927    |
| 3395 | IYD1_MOUSE  | Iyd      | Iodotyrosine deiodinase 1                                            | 0,23763    | 0,0776756   |
| 3396 | KEG1_MOUSE  | Keg1     | Glycine N-acyltransferase-like protein Keg1                          | 0,146435   | -0,088488   |
| 3397 | MIC26_MOUSE | Apoo     | MICOS complex subunit Mic26                                          | 0,0216661  | 0,0262684   |
| 3398 | RARR2_MOUSE | Rarres2  | Retinoic acid receptor responder protein 2                           | 1,34783    | 0,379259    |
| 3399 | MET7B_MOUSE | Mettl7b  | Methyltransferase-like protein 7B                                    | 2,15112    | 0,739414    |
| 3400 | SAC1_MOUSE  | Sacm1l   | Phosphatidylinositol phosphatase SAC1                                | 0,61706    | 0,182521    |
| 3401 | RAI14_MOUSE | Rai14    | Ankycorbin                                                           | 0,0381603  | 0,026453    |
| 3402 | EMC7_MOUSE  | Emc7     | ER membrane protein complex subunit 7                                | 0,157702   | 0,0601303   |
| 3403 | CP4FE_MOUSE | Cyp4f14  | Leukotriene-B4 omega-hydroxylase 3                                   | 0,0218927  | 0,0215343   |
| 3404 | LACTB_MOUSE | Lactb    | Serine beta-lactamase-like protein LACTB, mitochondrial              | 0,554812   | 0,653903    |
| 3405 | NMNA1_MOUSE | Nmnat1   | Nicotinamide/nicotinic acid mononucleotide adenylyltransferase 1     | 0,339347   | 0,616962    |
| 3406 | ASC_MOUSE   | Pycard   | Apoptosis-associated speck-like protein containing a CARD            | 0,134181   | -0,114148   |
| 3407 | SERHL_MOUSE | Serhl    | Serine hydrolase-like protein                                        | 0,143382   | -0,105812   |
| 3408 | PARVA_MOUSE | Parva    | Alpha-parvin                                                         | 0,230459   | -0,094413   |
| 3409 | AT131_MOUSE | Atp13a1  | Manganese-transporting ATPase 13A1                                   | 1,31066    | 0,23872     |
| 3410 | ARFG1_MOUSE | Arfgap1  | ADP-ribosylation factor GTPase-activating protein 1                  | 0,190251   | 0,148255    |
| 3411 | SIL1_MOUSE  | Sil1     | Nucleotide exchange factor SIL1                                      | 0,237293   | -0,233152   |
| 3412 | XPO7_MOUSE  | Xpo7     | Exportin-7                                                           | 0,00545379 | 0,00358734  |
| 3413 | IPO7_MOUSE  | Ipo7     | Importin-7                                                           | 0,296412   | -0,296157   |
| 3414 | STAR5_MOUSE | Stard5   | StAR-related lipid transfer protein 5                                | 0,951617   | 1,82236     |
| 3415 | RENT1_MOUSE | Upf1     | Regulator of nonsense transcripts 1                                  | 1,10713    | 0,308854    |
| 3416 | CPSF1_MOUSE | Cpsf1    | Cleavage and polyadenylation specificity factor subunit 1            | 0,0673355  | -0,0374424  |
| 3417 | UBL5_MOUSE  | Ubl5     | Ubiquitin-like protein 5                                             | 0,063212   | -0,0643967  |
| 3418 | DHB11_MOUSE | Hsd17b11 | Estradiol 17-beta-dehydrogenase 11                                   | 0,297403   | 0,263759    |
| 3419 | MSMA_MOUSE  | Aldh6a1  | Methylmalonate-semialdehyde dehydrogenase [acylating], mitochondrial | 0,0139305  | -0,00743065 |
| 3420 | BCAP_MOUSE  | Pik3ap1  | Phosphoinositide 3-kinase adapter protein 1                          | 0,533958   | 0,279132    |
| 3421 | PESC_MOUSE  | Pes1     | Pescadillo homolog                                                   | 0,361688   | 0,107467    |
| 3422 | 3BHS7_MOUSE | Hsd3b7   | 3 beta-hydroxysteroid dehydrogenase type 7                           | 0,470348   | -0,784278   |
| 3423 | SCYL1_MOUSE | Scyl1    | N-terminal kinase-like protein                                       | 0,0799518  | 0,103183    |
| 3424 | DPYS_MOUSE  | Dpys     | Dihydropyrimidinase                                                  | 0,371633   | 0,163741    |
| 3425 | C43BP_MOUSE | Col4a3bp | Collagen type IV alpha-3-binding protein                             | 0,0978873  | 0,0517319   |
| 3426 | ERAP1_MOUSE | Erap1    | Endoplasmic reticulum aminopeptidase 1                               | 0,0472052  | 0,0223763   |
| 3427 | VPS35_MOUSE | Vps35    | Vacuolar protein sorting-associated protein 35                       | 0,612226   | -0,283379   |

|      |             |          |                                                                      |            |             |
|------|-------------|----------|----------------------------------------------------------------------|------------|-------------|
| 3428 | RM46_MOUSE  | Mrpl46   | 39S ribosomal protein L46, mitochondrial                             | 0,236875   | -0,0914696  |
| 3429 | MAGI3_MOUSE | Magi3    | Membrane-associated guanylate kinase, WW and PDZ domain-containing p | 0,528624   | -0,581143   |
| 3430 | MVP_MOUSE   | Mvp      | Major vault protein                                                  | 1,53739    | 0,729047    |
| 3431 | EHD4_MOUSE  | Ehd4     | EH domain-containing protein 4                                       | 0,859095   | 0,498403    |
| 3432 | OGA_MOUSE   | Oga      | Protein O-GlcNAcase                                                  | 0,0952587  | -0,0716949  |
| 3433 | MYCBP_MOUSE | Mycbp    | c-Myc-binding protein                                                | 0,672384   | 0,38535     |
| 3434 | SET_MOUSE   | Set      | Protein SET                                                          | 0,356348   | 0,159284    |
| 3435 | KI13A_MOUSE | Kif13a   | Kinesin-like protein KIF13A                                          | 0,238597   | 0,170543    |
| 3436 | RPGF4_MOUSE | Rapgef4  | Rap guanine nucleotide exchange factor 4                             | 0,921181   | -0,462106   |
| 3437 | STX12_MOUSE | Stx12    | Syntaxin-12                                                          | 0,197444   | 0,170055    |
| 3438 | TOR1A_MOUSE | Tor1a    | Torsin-1A                                                            | 0,145641   | -0,0877811  |
| 3439 | TOR1B_MOUSE | Tor1b    | Torsin-1B                                                            | 0,321828   | 0,364919    |
| 3440 | FL2D_MOUSE  | Wtap     | Pre-mRNA-splicing regulator WTAP                                     | 0,577247   | 0,21921     |
| 3441 | SYCC_MOUSE  | Cars     | Cysteine-tRNA ligase, cytoplasmic                                    | 2,89871    | 0,687124    |
| 3442 | ELP4_MOUSE  | Elp4     | Elongator complex protein 4                                          | 0,844159   | 0,408858    |
| 3443 | RT29_MOUSE  | Dap3     | 28S ribosomal protein S29, mitochondrial                             | 0,22493    | -0,112862   |
| 3444 | TFP11_MOUSE | Tfip11   | Tuftelin-interacting protein 11                                      | 0,69619    | -0,894053   |
| 3445 | SNP29_MOUSE | Snap29   | Synaptosomal-associated protein 29                                   | 1,28179    | 0,457086    |
| 3446 | MESD_MOUSE  | Mesd     | LRP chaperone MESD                                                   | 0,447232   | 0,270618    |
| 3447 | LIMA1_MOUSE | Lima1    | LIM domain and actin-binding protein 1                               | 0,219506   | 0,170894    |
| 3448 | RDH14_MOUSE | Rdh14    | Retinol dehydrogenase 14                                             | 0,601829   | 0,208233    |
| 3449 | XPO2_MOUSE  | Cse1l    | Exportin-2                                                           | 0,00069973 | 0,000373459 |
| 3450 | GCYA1_MOUSE | Gucy1a1  | Guanylate cyclase soluble subunit alpha-1                            | 0,409831   | -0,21497    |
| 3451 | SEP15_MOUSE | Selenof  | Selenoprotein F                                                      | 0,586212   | 0,490669    |
| 3452 | NDUAD_MOUSE | Ndufa13  | NADH dehydrogenase [ubiquinone] 1 alpha subcomplex subunit 13        | 0,075061   | 0,0418331   |
| 3453 | RBP2_MOUSE  | Ranbp2   | E3 SUMO-protein ligase RanBP2                                        | 0,144404   | -0,0578262  |
| 3454 | UBE4B_MOUSE | Ube4b    | Ubiquitin conjugation factor E4 B                                    | 0,0489936  | -0,131072   |
| 3455 | ARHG7_MOUSE | Arhgef7  | Rho guanine nucleotide exchange factor 7                             | 0,279807   | 0,0961754   |
| 3456 | SHIP1_MOUSE | Inpp5d   | Phosphatidylinositol 3,4,5-trisphosphate 5-phosphatase 1             | 0,83282    | 0,839963    |
| 3457 | NEK7_MOUSE  | Nek7     | Serine/threonine-protein kinase Nek7                                 | 2,20327    | 0,599974    |
| 3458 | HRG_MOUSE   | Hrg      | Histidine-rich glycoprotein                                          | 0,150989   | 0,160001    |
| 3459 | DYSF_MOUSE  | Dysf     | Dysferlin                                                            | 0,66316    | 0,410694    |
| 3460 | LRBA_MOUSE  | Lrba     | Lipopolysaccharide-responsive and beige-like anchor protein          | 0,156885   | 0,0869949   |
| 3461 | SDF2L_MOUSE | Sdf2l1   | Stromal cell-derived factor 2-like protein 1                         | 1,72384    | 0,611328    |
| 3462 | PSMG2_MOUSE | Psmg2    | Proteasome assembly chaperone 2                                      | 1,34187    | -0,500664   |
| 3463 | AN32B_MOUSE | Anp32b   | Acidic leucine-rich nuclear phosphoprotein 32 family member B        | 0,795828   | 2,24936     |
| 3464 | BRD4_MOUSE  | Brd4     | Bromodomain-containing protein 4                                     | 0,681837   | 0,348977    |
| 3465 | DDX24_MOUSE | Ddx24    | ATP-dependent RNA helicase DDX24                                     | 0,435186   | -0,308675   |
| 3466 | AGK_MOUSE   | Agk      | Acylglycerol kinase, mitochondrial                                   | 0,592873   | -0,654194   |
| 3467 | PGPI_MOUSE  | Pgpep1   | Pyroglutamyl-peptidase 1                                             | 0,381592   | -0,26106    |
| 3468 | DKC1_MOUSE  | Dkc1     | H/ACA ribonucleoprotein complex subunit DKC1                         | 0,367775   | 0,139245    |
| 3469 | GTF2I_MOUSE | Gtf2i    | General transcription factor II-I                                    | 0,831624   | 0,394237    |
| 3470 | PYGL_MOUSE  | Pygl     | Glycogen phosphorylase, liver form                                   | 0,294819   | -0,179134   |
| 3471 | DPP2_MOUSE  | Dpp7     | Dipeptidyl peptidase 2                                               | 1,85085    | 0,742417    |
| 3472 | RN114_MOUSE | Rnf114   | E3 ubiquitin-protein ligase RNF114                                   | 0,763338   | 0,661261    |
| 3473 | PALLD_MOUSE | Palld    | Palladin                                                             | 1,9291     | 0,71303     |
| 3474 | CBPB2_MOUSE | Cpb2     | Carboxypeptidase B2                                                  | 0,0846888  | 0,0720917   |
| 3475 | IVD_MOUSE   | Ivd      | Isovaleryl-CoA dehydrogenase, mitochondrial                          | 0,0155227  | -0,0198994  |
| 3476 | TMOD3_MOUSE | Tmod3    | Tropomodulin-3                                                       | 1,32624    | 0,394094    |
| 3477 | PGTA_MOUSE  | Rabggt1a | Geranylgeranyl transferase type-2 subunit alpha                      | 2,17157    | 0,700645    |
| 3478 | NHRF2_MOUSE | Slc9a3r2 | Na(+)/H(+) exchange regulatory cofactor NHE-RF2                      | 1,49006    | 0,644034    |
| 3479 | IDE_MOUSE   | Ide      | Insulin-degrading enzyme                                             | 0,109528   | -0,0994186  |

|      |             |         |                                                                                |           |            |
|------|-------------|---------|--------------------------------------------------------------------------------|-----------|------------|
| 3480 | CLPX_MOUSE  | Clpx    | ATP-dependent Clp protease ATP-binding subunit clpX-like, mitochondrial        | 2,18049   | 0,480718   |
| 3481 | CWC15_MOUSE | Cwc15   | Spliceosome-associated protein CWC15 homolog                                   | 0,351294  | -0,319922  |
| 3482 | PALMD_MOUSE | Palmd   | Palmdelphin                                                                    | 0,802525  | 0,581081   |
| 3483 | DYHC1_MOUSE | Dync1h1 | Cytoplasmic dynein 1 heavy chain 1                                             | 2,06019   | 0,448226   |
| 3484 | INO1_MOUSE  | Isyna1  | Inositol-3-phosphate synthase 1                                                | 1,09215   | 0,511116   |
| 3485 | NIT2_MOUSE  | Nit2    | Omega-amidase NIT2                                                             | 0,618297  | 0,420358   |
| 3486 | SELB_MOUSE  | Eefsec  | Selenocysteine-specific elongation factor                                      | 0,0712565 | -0,063533  |
| 3487 | STK3_MOUSE  | Stk3    | Serine/threonine-protein kinase 3                                              | 0,320388  | 0,255798   |
| 3488 | ABCEA_MOUSE | Abcb10  | ATP-binding cassette sub-family B member 10, mitochondrial                     | 1,24295   | 0,490829   |
| 3489 | NQO2_MOUSE  | Nqo2    | Ribosyldihyronicotinamide dehydrogenase [quinone]                              | 0,0413149 | 0,0325157  |
| 3490 | NGLY1_MOUSE | Ngly1   | Peptide-N(4)-(N-acetyl-beta-glucosaminy)asparagine amidase                     | 0,488518  | 0,498256   |
| 3491 | SPHK2_MOUSE | Sphk2   | Sphingosine kinase 2                                                           | 0,311531  | 0,315557   |
| 3492 | COPB_MOUSE  | Copb1   | Coatamer subunit beta                                                          | 0,200314  | -0,223203  |
| 3493 | CCD22_MOUSE | Ccdc22  | Coiled-coil domain-containing protein 22                                       | 0,607973  | 0,270214   |
| 3494 | NUP50_MOUSE | Nup50   | Nuclear pore complex protein Nup50                                             | 0,474624  | 0,273248   |
| 3495 | AK1A1_MOUSE | Akr1a1  | Aldo-keto reductase family 1 member A1                                         | 0,242267  | 0,136329   |
| 3496 | DDX21_MOUSE | Ddx21   | Nucleolar RNA helicase 2                                                       | 1,50764   | 0,494812   |
| 3497 | RT34_MOUSE  | Mrps34  | 28S ribosomal protein S34, mitochondrial                                       | 0,941336  | 0,260756   |
| 3498 | NHRF3_MOUSE | Pdzk1   | Na(+)/H(+) exchange regulatory cofactor NHE-RF3                                | 0,659027  | 0,496889   |
| 3499 | RALB_MOUSE  | Ralb    | Ras-related protein Ral-B                                                      | 0,528798  | -0,258507  |
| 3500 | ENY2_MOUSE  | Eny2    | Transcription and mRNA export factor ENY2                                      | 0,579308  | 0,279481   |
| 3501 | ACINU_MOUSE | Acin1   | Apoptotic chromatin condensation inducer in the nucleus                        | 0,0728633 | 0,0303104  |
| 3502 | HTRA2_MOUSE | Htra2   | Serine protease HTRA2, mitochondrial                                           | 0,805087  | 0,65816    |
| 3503 | CMLO1_MOUSE | Cml1    | Probable N-acetyltransferase CML1                                              | 0,0118185 | 0,0192696  |
| 3504 | FLII_MOUSE  | Flii    | Protein flightless-1 homolog                                                   | 0,227742  | 0,0545494  |
| 3505 | RPF2_MOUSE  | Rpf2    | Ribosome production factor 2 homolog                                           | 0,128685  | -0,0454281 |
| 3506 | WDR12_MOUSE | Wdr12   | Ribosome biogenesis protein WDR12                                              | 0,429088  | 0,281584   |
| 3507 | RIX1_MOUSE  | Riox1   | Ribosomal oxygenase 1                                                          | 0,216011  | 0,107052   |
| 3508 | RNAS4_MOUSE | Rnase4  | Ribonuclease 4                                                                 | 0,0577409 | -0,0643097 |
| 3509 | RL38_MOUSE  | Rpl38   | 60S ribosomal protein L38                                                      | 0,405373  | -0,433167  |
| 3510 | LANC2_MOUSE | Lanc12  | LanC-like protein 2                                                            | 0,201409  | -0,465059  |
| 3511 | SYSM_MOUSE  | Sars2   | Serine--tRNA ligase, mitochondrial                                             | 1,37924   | 0,437946   |
| 3512 | CBPN_MOUSE  | Cpn1    | Carboxypeptidase N catalytic chain                                             | 1,70126   | 0,662394   |
| 3513 | SH3L1_MOUSE | Sh3bgr1 | SH3 domain-binding glutamic acid-rich-like protein                             | 0,14362   | -0,103491  |
| 3514 | PROF2_MOUSE | Pfn2    | Profilin-2                                                                     | 0,380968  | 0,247778   |
| 3515 | P2RX4_MOUSE | P2rx4   | P2X purinoceptor 4                                                             | 0,574056  | 0,259809   |
| 3516 | PSMG1_MOUSE | Psmg1   | Proteasome assembly chaperone 1                                                | 0,205811  | 0,103117   |
| 3517 | GNA1_MOUSE  | Gnpnat1 | Glucosamine 6-phosphate N-acetyltransferase                                    | 0,325913  | -0,158993  |
| 3518 | PDK2_MOUSE  | Pdk2    | [Pyruvate dehydrogenase (acetyl-transferring)] kinase isozyme 2, mitochondrion | 0,446553  | -0,377381  |
| 3519 | SHLB1_MOUSE | Sh3glb1 | Endophilin-B1                                                                  | 0,486607  | 0,35005    |
| 3520 | PRELP_MOUSE | Prelp   | Prolargin                                                                      | 0,62358   | 0,234159   |
| 3521 | MYG1_MOUSE  | Myg1    | UPF0160 protein MYG1, mitochondrial                                            | 1,31097   | 0,421009   |
| 3522 | HSPB8_MOUSE | Hspb8   | Heat shock protein beta-8                                                      | 0,938896  | 0,579964   |
| 3523 | UCHL3_MOUSE | Uchl3   | Ubiquitin carboxyl-terminal hydrolase isozyme L3                               | 0,628911  | 0,523218   |
| 3524 | AP3M1_MOUSE | Ap3m1   | AP-3 complex subunit mu-1                                                      | 0,194828  | -0,0764469 |
| 3525 | IQGA1_MOUSE | Iqgap1  | Ras GTPase-activating-like protein IQGAP1                                      | 0,390248  | -0,294669  |
| 3526 | RM39_MOUSE  | Mrpl39  | 39S ribosomal protein L39, mitochondrial                                       | 0,201281  | 0,116987   |
| 3527 | CP39A_MOUSE | Cyp39a1 | 24-hydroxycholesterol 7-alpha-hydroxylase                                      | 0,30088   | 0,192792   |
| 3528 | NDUF3_MOUSE | Ndurf3  | NADH dehydrogenase [ubiquinone] 1 alpha subcomplex assembly factor 3           | 0,633719  | 0,371091   |
| 3529 | MBNL1_MOUSE | Mbnl1   | Muscleblind-like protein 1                                                     | 0,369936  | 0,3098     |
| 3530 | HYOU1_MOUSE | Hyou1   | Hypoxia up-regulated protein 1                                                 | 2,99603   | 0,717128   |
| 3531 | ADRM1_MOUSE | Adrm1   | Proteasomal ubiquitin receptor ADRM1                                           | 0,0049472 | 0,00276375 |

|      |             |          |                                                                    |           |            |
|------|-------------|----------|--------------------------------------------------------------------|-----------|------------|
| 3532 | TFR2_MOUSE  | Tfr2     | Transferrin receptor protein 2                                     | 0,273123  | 0,190767   |
| 3533 | AATF_MOUSE  | Aatf     | Protein AATF                                                       | 0,98087   | 0,432796   |
| 3534 | NUDT5_MOUSE | Nudt5    | ADP-sugar pyrophosphatase                                          | 2,20214   | 0,387336   |
| 3535 | HIP1R_MOUSE | Hip1r    | Huntingtin-interacting protein 1-related protein                   | 1,44783   | 0,488779   |
| 3536 | LEG8_MOUSE  | Lgals8   | Galectin-8                                                         | 2,56276   | 0,87243    |
| 3537 | ISG20_MOUSE | Isg20    | Interferon-stimulated gene 20 kDa protein                          | 1,05301   | 0,629499   |
| 3538 | HMG5_MOUSE  | Hmgn5    | High mobility group nucleosome-binding domain-containing protein 5 | 0,136937  | -0,05839   |
| 3539 | MPP6_MOUSE  | Mpp6     | MAGUK p55 subfamily member 6                                       | 1,49002   | 0,638602   |
| 3540 | MSRB1_MOUSE | Msrb1    | Methionine-R-sulfoxide reductase B1                                | 1,38695   | -0,891159  |
| 3541 | TGM1_MOUSE  | Tgm1     | Protein-glutamine gamma-glutamyltransferase K                      | 0,493815  | 0,377078   |
| 3542 | SCLY_MOUSE  | Scly     | Selenocysteine lyase                                               | 0,0846679 | -0,0356136 |
| 3543 | SART3_MOUSE | Sart3    | Squamous cell carcinoma antigen recognized by T-cells 3            | 0,666778  | 0,419762   |
| 3544 | AL9A1_MOUSE | Aldh9a1  | 4-trimethylaminobutyraldehyde dehydrogenase                        | 1,15339   | 0,590831   |
| 3545 | GRB14_MOUSE | Grb14    | Growth factor receptor-bound protein 14                            | 1,26517   | 0,429961   |
| 3546 | MTOR_MOUSE  | Mtor     | Serine/threonine-protein kinase mTOR                               | 0,546292  | -0,357514  |
| 3547 | CD2AP_MOUSE | Cd2ap    | CD2-associated protein                                             | 0,788868  | 0,478403   |
| 3548 | TRXR2_MOUSE | Txnrd2   | Thioredoxin reductase 2, mitochondrial                             | 0,0511877 | 0,0293552  |
| 3549 | BAG3_MOUSE  | Bag3     | BAG family molecular chaperone regulator 3                         | 0,610138  | 0,220322   |
| 3550 | CUL3_MOUSE  | Cul3     | Cullin-3                                                           | 0,0704336 | 0,05994    |
| 3551 | PNKP_MOUSE  | Pnkp     | Bifunctional polynucleotide phosphatase/kinase                     | 0,595202  | 0,509978   |
| 3552 | AUHM_MOUSE  | Auh      | Methylglutaconyl-CoA hydratase, mitochondrial                      | 0,713761  | 0,249685   |
| 3553 | RABX5_MOUSE | Rabgef1  | Rab5 GDP/GTP exchange factor                                       | 1,00064   | 0,824152   |
| 3554 | NT5C_MOUSE  | Nt5c     | 5'(3')-deoxyribonucleotidase, cytosolic type                       | 0,0221539 | -0,0142536 |
| 3555 | MINK1_MOUSE | Mink1    | Misshapen-like kinase 1                                            | 0,0849776 | 0,0494381  |
| 3556 | REEP6_MOUSE | Reep6    | Receptor expression-enhancing protein 6                            | 1,97781   | 0,68267    |
| 3557 | ARPC3_MOUSE | Arcp3    | Actin-related protein 2/3 complex subunit 3                        | 0,176996  | 0,16101    |
| 3558 | UBP14_MOUSE | Usp14    | Ubiquitin carboxyl-terminal hydrolase 14                           | 0,664924  | -0,183026  |
| 3559 | ZN207_MOUSE | Znf207   | BUB3-interacting and GLEBS motif-containing protein ZNF207         | 0,536626  | 0,369172   |
| 3560 | STA10_MOUSE | Stard10  | START domain-containing protein 10                                 | 0,182362  | 0,0993446  |
| 3561 | TPC2L_MOUSE | Trappc2l | Trafficking protein particle complex subunit 2-like protein        | 1,10579   | 0,214978   |
| 3562 | EDF1_MOUSE  | Edf1     | Endothelial differentiation-related factor 1                       | 0,218944  | 0,332273   |
| 3563 | TRXR1_MOUSE | Txnrd1   | Thioredoxin reductase 1, cytoplasmic                               | 0,0461917 | 0,0301991  |
| 3564 | MY18A_MOUSE | Myo18a   | Unconventional myosin-XVIIIa                                       | 1,31848   | 0,394786   |
| 3565 | HAOX2_MOUSE | Hao2     | Hydroxyacid oxidase 2                                              | 0,247559  | 0,335923   |
| 3566 | GLRX1_MOUSE | Glrx     | Glutaredoxin-1                                                     | 0,108429  | 0,135981   |
| 3567 | RHOA_MOUSE  | Rhoa     | Transforming protein RhoA                                          | 0,522323  | -0,334977  |
| 3568 | ACSL4_MOUSE | Acsl4    | Long-chain-fatty-acid--CoA ligase 4                                | 0,119025  | 0,118695   |
| 3569 | PSA6_MOUSE  | Psm6     | Proteasome subunit alpha type-6                                    | 0,952878  | 0,235248   |
| 3570 | HPLN1_MOUSE | Hapln1   | Hyaluronan and proteoglycan link protein 1                         | 2,73063   | 1,06107    |
| 3571 | PPCE_MOUSE  | Prep     | Prolyl endopeptidase                                               | 0,383536  | -0,189686  |
| 3572 | PIN1_MOUSE  | Pin1     | Peptidyl-prolyl cis-trans isomerase NIMA-interacting 1             | 1,02607   | 0,709307   |
| 3573 | FAK2_MOUSE  | Ptk2b    | Protein-tyrosine kinase 2-beta                                     | 0,222888  | -0,465947  |
| 3574 | ST1B1_MOUSE | Sult1b1  | Sulfotransferase family cytosolic 1B member 1                      | 0,309738  | -0,258252  |
| 3575 | CD5L_MOUSE  | Cd5l     | CD5 antigen-like                                                   | 2,84374   | 1,56921    |
| 3576 | NAGAB_MOUSE | Naga     | Alpha-N-acetylgalactosaminidase                                    | 0,620953  | -0,335906  |
| 3577 | SON_MOUSE   | Son      | Protein SON                                                        | 0,234504  | 0,225341   |
| 3578 | DGUOK_MOUSE | Dguok    | Deoxyguanosine kinase, mitochondrial                               | 1,19161   | -1,1492    |
| 3579 | LSM4_MOUSE  | Lsm4     | U6 snRNA-associated Sm-like protein LSM4                           | 0,180461  | 0,101962   |
| 3580 | DRG2_MOUSE  | Drg2     | Developmentally-regulated GTP-binding protein 2                    | 0,324212  | 0,115246   |
| 3581 | FETUB_MOUSE | Fetub    | Fetuin-B                                                           | 0,608408  | -0,228405  |
| 3582 | ACOX2_MOUSE | Acox2    | Peroxisomal acyl-coenzyme A oxidase 2                              | 0,136701  | -0,0785992 |
| 3583 | F16P1_MOUSE | Fbp1     | Fructose-1,6-bisphosphatase 1                                      | 1,13941   | 0,261461   |

|      |              |          |                                                           |            |             |
|------|--------------|----------|-----------------------------------------------------------|------------|-------------|
| 3584 | LIMD1_MOUSE  | Limd1    | LIM domain-containing protein 1                           | 1,33855    | 0,446235    |
| 3585 | HACL1_MOUSE  | Hacl1    | 2-hydroxyacyl-CoA lyase 1                                 | 0,965274   | 0,438124    |
| 3586 | TBL1X_MOUSE  | Tbl1x    | F-box-like/WD repeat-containing protein TBL1X             | 0,920226   | -0,338957   |
| 3587 | GNMT_MOUSE   | Gnmt     | Glycine N-methyltransferase                               | 1,4973     | -1,11349    |
| 3588 | RAE1_MOUSE   | Chm      | Rab proteins geranylgeranyltransferase component A 1      | 0,627732   | 0,2085      |
| 3589 | ACSA_MOUSE   | Acss2    | Acetyl-coenzyme A synthetase, cytoplasmic                 | 0,199605   | -0,468626   |
| 3590 | COPG2_MOUSE  | Copg2    | Coatomer subunit gamma-2                                  | 0,161345   | -0,085815   |
| 3591 | CPSF3_MOUSE  | Cpsf3    | Cleavage and polyadenylation specificity factor subunit 3 | 0,13738    | 0,0553249   |
| 3592 | KIF21A_MOUSE | Kif21a   | Kinesin-like protein KIF21A                               | 1,6782     | 0,67179     |
| 3593 | NDK7_MOUSE   | Nme7     | Nucleoside diphosphate kinase 7                           | 1,48867    | 1,28373     |
| 3594 | ABHD2_MOUSE  | Abhd2    | Monoacylglycerol lipase ABHD2                             | 0,567905   | 0,891261    |
| 3595 | TRIP4_MOUSE  | Trip4    | Activating signal cointegrator 1                          | 0,00984812 | -0,00886002 |
| 3596 | PLEC_MOUSE   | Plec     | Plectin                                                   | 0,976681   | -0,164904   |
| 3597 | CNPY2_MOUSE  | Cnpy2    | Protein canopy homolog 2                                  | 0,154235   | 0,127875    |
| 3598 | CMC2_MOUSE   | Slc25a13 | Calcium-binding mitochondrial carrier protein Aralar2     | 0,14192    | 0,0911034   |
| 3599 | ZO3_MOUSE    | Tjp3     | Tight junction protein ZO-3                               | 2,45322    | 0,829159    |
| 3600 | EHD3_MOUSE   | Ehd3     | EH domain-containing protein 3                            | 0,00813572 | 0,00262375  |
| 3601 | PEX3_MOUSE   | Pex3     | Peroxisomal biogenesis factor 3                           | 1,43724    | 0,484442    |
| 3602 | MACF1_MOUSE  | Macf1    | Microtubule-actin cross-linking factor 1                  | 0,369332   | 0,274777    |
| 3603 | MYO9B_MOUSE  | Myo9b    | Unconventional myosin-IXb                                 | 1,46468    | 1,93466     |
| 3604 | ABCB8_MOUSE  | Abcb11   | Bile salt export pump                                     | 0,0517065  | 0,0283142   |
| 3605 | NAA10_MOUSE  | Naa10    | N-alpha-acetyltransferase 10                              | 0,595576   | 0,535133    |
| 3606 | VAPB_MOUSE   | Vapb     | Vesicle-associated membrane protein-associated protein B  | 0,46872    | 0,136458    |
| 3607 | PO210_MOUSE  | Nup210   | Nuclear pore membrane glycoprotein 210                    | 1,13157    | 0,411907    |
| 3608 | CLIC4_MOUSE  | Clic4    | Chloride intracellular channel protein 4                  | 0,229047   | 0,0754646   |
| 3609 | ADD3_MOUSE   | Add3     | Gamma-adducin                                             | 0,592472   | 0,802506    |
| 3610 | ADDA_MOUSE   | Add1     | Alpha-adducin                                             | 0,512483   | 0,242399    |
| 3611 | VKGC_MOUSE   | Ggcx     | Vitamin K-dependent gamma-carboxylase                     | 0,247449   | -0,440923   |
| 3612 | GGA5_MOUSE   | Golga5   | Golgin subfamily A member 5                               | 1,13255    | 0,461129    |
| 3613 | RDH11_MOUSE  | Rdh11    | Retinol dehydrogenase 11                                  | 0,195636   | 0,28809     |
| 3614 | NDRG2_MOUSE  | Ndrp2    | Protein NDRG2                                             | 0,243424   | -0,181444   |
| 3615 | DNJC7_MOUSE  | Dnajc7   | DnaJ homolog subfamily C member 7                         | 1,28951    | 0,433998    |
| 3616 | DJB12_MOUSE  | Dnajb12  | DnaJ homolog subfamily B member 12                        | 0,701557   | 0,290143    |
| 3617 | DNJA2_MOUSE  | Dnaja2   | DnaJ homolog subfamily A member 2                         | 0,311789   | -0,13917    |
| 3618 | DNJB1_MOUSE  | Dnajb1   | DnaJ homolog subfamily B member 1                         | 2,50894    | 0,896761    |
| 3619 | ACOT3_MOUSE  | Acot3    | Acyl-coenzyme A thioesterase 3                            | 0,547267   | 0,716725    |
| 3620 | ACOT2_MOUSE  | Acot2    | Acyl-coenzyme A thioesterase 2, mitochondrial             | 1,7491     | 1,34801     |
| 3621 | QKI_MOUSE    | Qki      | Protein quaking                                           | 0,945616   | 0,362001    |
| 3622 | SPAST_MOUSE  | Spast    | Spastin                                                   | 1,56645    | 0,983284    |
| 3623 | ADH4_MOUSE   | Adh4     | All-trans-retinol dehydrogenase [NAD(+)] ADH4             | 1,11296    | 0,909702    |
| 3624 | TOLIP_MOUSE  | Tollip   | Toll-interacting protein                                  | 0,984862   | 0,259751    |
| 3625 | NAGK_MOUSE   | Nagk     | N-acetyl-D-glucosamine kinase                             | 0,230919   | -0,225806   |
| 3626 | NFU1_MOUSE   | Nfu1     | NFU1 iron-sulfur cluster scaffold homolog, mitochondrial  | 0,578412   | 0,360226    |
| 3627 | VNN3_MOUSE   | Vnn3     | Vascular non-inflammatory molecule 3                      | 0,947312   | 2,00099     |
| 3628 | DCNL1_MOUSE  | Dcn1d1   | DCN1-like protein 1                                       | 1,32864    | -0,483506   |
| 3629 | IIGP1_MOUSE  | Iigp1    | Interferon-inducible GTPase 1                             | 0,0039483  | 0,00351563  |
| 3630 | VPS29_MOUSE  | Vps29    | Vacuolar protein sorting-associated protein 29            | 0,649251   | -0,324362   |
| 3631 | ARP10_MOUSE  | Actr10   | Actin-related protein 10                                  | 0,912525   | 0,928305    |
| 3632 | DCTN5_MOUSE  | Dctn5    | Dynactin subunit 5                                        | 1,09454    | 0,457962    |
| 3633 | DIC_MOUSE    | Slc25a10 | Mitochondrial dicarboxylate carrier                       | 0,655667   | -0,380078   |
| 3634 | EIF3I_MOUSE  | Eif3i    | Eukaryotic translation initiation factor 3 subunit I      | 0,622268   | 0,403186    |
| 3635 | COPG1_MOUSE  | Copg1    | Coatomer subunit gamma-1                                  | 0,393544   | 0,34468     |

|      |             |         |                                                                              |            |             |
|------|-------------|---------|------------------------------------------------------------------------------|------------|-------------|
| 3636 | TSNAX_MOUSE | Tsnax   | Translin-associated protein X                                                | 0,326685   | 0,253603    |
| 3637 | ECSIT_MOUSE | Ecsit   | Evolutionarily conserved signaling intermediate in Toll pathway, mitochondri | 1,28354    | 0,389082    |
| 3638 | FBX6_MOUSE  | Fbxo6   | F-box only protein 6                                                         | 1,68206    | 0,550179    |
| 3639 | AFAD_MOUSE  | Afdn    | Afadin                                                                       | 0,442843   | 0,250459    |
| 3640 | H2AY_MOUSE  | H2afy   | Core histone macro-H2A.1                                                     | 0,771707   | 0,363255    |
| 3641 | NUMB_MOUSE  | Numb    | Protein numb homolog                                                         | 1,76442    | 0,377579    |
| 3642 | SGK2_MOUSE  | Sgk2    | Serine/threonine-protein kinase Sgk2                                         | 0,514956   | -0,46677    |
| 3643 | UB2L6_MOUSE | Ube2l6  | Ubiquitin/ISG15-conjugating enzyme E2 L6                                     | 0,0651019  | 0,0294647   |
| 3644 | AT11C_MOUSE | Atp11c  | Phospholipid-transporting ATPase 11C                                         | 0,300271   | -0,148244   |
| 3645 | KIME_MOUSE  | Mvk     | Mevalonate kinase                                                            | 0,212309   | -0,273238   |
| 3646 | ZRAB2_MOUSE | Zranb2  | Zinc finger Ran-binding domain-containing protein 2                          | 0,926987   | 0,324275    |
| 3647 | AMFR_MOUSE  | Amfr    | E3 ubiquitin-protein ligase AMFR                                             | 1,28817    | 0,667955    |
| 3648 | NUBP1_MOUSE | Nubp1   | Cytosolic Fe-S cluster assembly factor NUBP1                                 | 0,570698   | 0,285083    |
| 3649 | NUBP2_MOUSE | Nubp2   | Cytosolic Fe-S cluster assembly factor NUBP2                                 | 1,28174    | 0,634407    |
| 3650 | GLYG_MOUSE  | Gyg1    | Glycogenin-1                                                                 | 0,0222493  | 0,0233704   |
| 3651 | GPC6_MOUSE  | Gpc6    | Glypican-6                                                                   | 1,92139    | 0,636625    |
| 3652 | H17B6_MOUSE | Hsd17b6 | 17-beta-hydroxysteroid dehydrogenase type 6                                  | 0,13104    | 0,0833057   |
| 3653 | TBL2_MOUSE  | Tbl2    | Transducin beta-like protein 2                                               | 0,264492   | 0,16232     |
| 3654 | PEX14_MOUSE | Pex14   | Peroxisomal membrane protein PEX14                                           | 1,23419    | 0,50098     |
| 3655 | PLOD3_MOUSE | Plod3   | Multifunctional procollagen lysine hydroxylase and glycosyltransferase LH3   | 1,55939    | 0,484822    |
| 3656 | PLOD1_MOUSE | Plod1   | Procollagen-lysine,2-oxoglutarate 5-dioxygenase 1                            | 0,0587395  | -0,0576252  |
| 3657 | ACOX1_MOUSE | Acox1   | Peroxisomal acyl-coenzyme A oxidase 1                                        | 1,19822    | 0,743946    |
| 3658 | YLPM1_MOUSE | Ylpm1   | YLP motif-containing protein 1                                               | 0,150238   | 0,0919342   |
| 3659 | RAB9A_MOUSE | Rab9a   | Ras-related protein Rab-9A                                                   | 1,42643    | 0,259368    |
| 3660 | GALK1_MOUSE | Galk1   | Galactokinase                                                                | 0,0314869  | -0,0223038  |
| 3661 | ESTD_MOUSE  | Esd     | S-formylglutathione hydrolase                                                | 0,602126   | 0,230153    |
| 3662 | DEST_MOUSE  | Dstn    | Destrin                                                                      | 0,10989    | -0,0886917  |
| 3663 | TMED2_MOUSE | Tmed2   | Transmembrane emp24 domain-containing protein 2                              | 0,0646647  | 0,160847    |
| 3664 | MO4L2_MOUSE | Morf4l2 | Mortality factor 4-like protein 2                                            | 1,80465    | 1,21347     |
| 3665 | ARC1A_MOUSE | Arpc1a  | Actin-related protein 2/3 complex subunit 1A                                 | 0,00235371 | -0,00109558 |
| 3666 | TEBP_MOUSE  | Ptges3  | Prostaglandin E synthase 3                                                   | 0,220217   | -0,140366   |
| 3667 | ACOT9_MOUSE | Acot9   | Acyl-coenzyme A thioesterase 9, mitochondrial                                | 0,759401   | 0,343981    |
| 3668 | GUAD_MOUSE  | Gda     | Guanine deaminase                                                            | 0,645173   | 0,420757    |
| 3669 | SQOR_MOUSE  | Sqor    | Sulfide:quinone oxidoreductase, mitochondrial                                | 0,52755    | 0,326723    |
| 3670 | TYK2_MOUSE  | Tyk2    | Non-receptor tyrosine-protein kinase TYK2                                    | 0,0101065  | 0,00742416  |
| 3671 | MTA2_MOUSE  | Mta2    | Metastasis-associated protein MTA2                                           | 0,310963   | 0,133774    |
| 3672 | PR40A_MOUSE | Prpf40a | Pre-mRNA-processing factor 40 homolog A                                      | 1,47613    | 0,396885    |
| 3673 | NSDHL_MOUSE | Nsdhl   | Sterol-4-alpha-carboxylate 3-dehydrogenase, decarboxylating                  | 0,296291   | 0,296435    |
| 3674 | PSA4_MOUSE  | Psma4   | Proteasome subunit alpha type-4                                              | 0,319607   | 0,345562    |
| 3675 | PSB3_MOUSE  | Psmb3   | Proteasome subunit beta type-3                                               | 0,193753   | -0,203835   |
| 3676 | PSB2_MOUSE  | Psmb2   | Proteasome subunit beta type-2                                               | 0,00293653 | -0,00200119 |
| 3677 | PSA1_MOUSE  | Psma1   | Proteasome subunit alpha type-1                                              | 1,55385    | 0,241854    |
| 3678 | MRP6_MOUSE  | Abcc6   | Multidrug resistance-associated protein 6                                    | 1,00494    | -0,556313   |
| 3679 | SAE1_MOUSE  | Sae1    | SUMO-activating enzyme subunit 1                                             | 0,0922597  | -0,0502357  |
| 3680 | SEPT6_MOUSE | Septin6 | Septin-6                                                                     | 0,94677    | -0,573514   |
| 3681 | PTPS_MOUSE  | Pts     | 6-pyruvoyl tetrahydrobiopterin synthase                                      | 0,487541   | 1,10671     |
| 3682 | VINEX_MOUSE | Sorbs3  | Vinexin                                                                      | 0,045354   | 0,0325035   |
| 3683 | TPSN_MOUSE  | Tapbp   | Tapasin                                                                      | 0,762825   | 0,403531    |
| 3684 | HEBP1_MOUSE | Hebp1   | Heme-binding protein 1                                                       | 0,0459257  | -0,0222267  |
| 3685 | PEPL_MOUSE  | Ppl     | Periplakin                                                                   | 1,37297    | 1,51056     |
| 3686 | MYO1C_MOUSE | Myo1c   | Unconventional myosin-Ic                                                     | 0,650815   | 0,190808    |
| 3687 | FIZ1_MOUSE  | Fiz1    | Flt3-interacting zinc finger protein 1                                       | 0,859204   | -0,681937   |

|      |             |         |                                                                            |           |            |
|------|-------------|---------|----------------------------------------------------------------------------|-----------|------------|
| 3688 | NFKB2_MOUSE | Nfkb2   | Nuclear factor NF-kappa-B p100 subunit                                     | 0,736547  | 0,448922   |
| 3689 | LYPA2_MOUSE | Lypla2  | Acyl-protein thioesterase 2                                                | 0,0445846 | 0,0683949  |
| 3690 | RUVB2_MOUSE | Ruvbl2  | RuvB-like 2                                                                | 0,643876  | 0,295498   |
| 3691 | KAD2_MOUSE  | Ak2     | Adenylate kinase 2, mitochondrial                                          | 2,16623   | 0,531147   |
| 3692 | KAD3_MOUSE  | Ak3     | GTP:AMP phosphotransferase AK3, mitochondrial                              | 1,26707   | -0,311084  |
| 3693 | AKA12_MOUSE | Akap12  | A-kinase anchor protein 12                                                 | 0,134607  | 0,284675   |
| 3694 | TIM23_MOUSE | Timm23  | Mitochondrial import inner membrane translocase subunit Tim23              | 0,794676  | 0,183559   |
| 3695 | PRKRA_MOUSE | Prkra   | Interferon-inducible double-stranded RNA-dependent protein kinase activato | 0,138753  | -0,0789082 |
| 3696 | SKP1_MOUSE  | Skp1    | S-phase kinase-associated protein 1                                        | 0,138157  | 0,0450584  |
| 3697 | CUL1_MOUSE  | Cul1    | Cullin-1                                                                   | 0,732985  | 0,301837   |
| 3698 | MD1L1_MOUSE | Mad1l1  | Mitotic spindle assembly checkpoint protein MAD1                           | 0,230625  | -0,164329  |
| 3699 | NRF1_MOUSE  | Nrf1    | Nuclear respiratory factor 1                                               | 0,604038  | 0,578453   |
| 3700 | HAOX1_MOUSE | Hao1    | Hydroxyacid oxidase 1                                                      | 2,68618   | 0,942296   |
| 3701 | PFD5_MOUSE  | Pfdn5   | Prefoldin subunit 5                                                        | 0,582059  | -0,532815  |
| 3702 | MAN1_MOUSE  | Lemd3   | Inner nuclear membrane protein Man1                                        | 2,36057   | 0,592836   |
| 3703 | NCOR2_MOUSE | Ncor2   | Nuclear receptor corepressor 2                                             | 0,0369983 | 0,0381157  |
| 3704 | TRUA_MOUSE  | Pus1    | tRNA pseudouridine synthase A                                              | 0,377933  | 0,340916   |
| 3705 | PDC6I_MOUSE | Pdcd6ip | Programmed cell death 6-interacting protein                                | 1,71807   | 0,176551   |
| 3706 | PROD_MOUSE  | Prodh   | Proline dehydrogenase 1, mitochondrial                                     | 0,310904  | -0,330989  |
| 3707 | CCS_MOUSE   | Ccs     | Copper chaperone for superoxide dismutase                                  | 0,209644  | 0,125421   |
| 3708 | SYFB_MOUSE  | Farsb   | Phenylalanine--tRNA ligase beta subunit                                    | 0,781484  | 0,359204   |
| 3709 | HOIL1_MOUSE | Rbck1   | RanBP-type and C3HC4-type zinc finger-containing protein 1                 | 1,10592   | 0,730296   |
| 3710 | PYGM_MOUSE  | Pygm    | Glycogen phosphorylase, muscle form                                        | 0,38879   | -0,670576  |
| 3711 | DCTN6_MOUSE | Dctn6   | Dynactin subunit 6                                                         | 1,76213   | 0,714344   |
| 3712 | CHIP_MOUSE  | Stub1   | STIP1 homology and U box-containing protein 1                              | 0,761429  | 0,308543   |
| 3713 | SEM4G_MOUSE | Sema4g  | Semaphorin-4G                                                              | 0,116527  | 0,139666   |
| 3714 | IF4H_MOUSE  | Eif4h   | Eukaryotic translation initiation factor 4H                                | 0,97111   | 0,248043   |
| 3715 | RFC2_MOUSE  | Rfc2    | Replication factor C subunit 2                                             | 1,26837   | 1,27543    |
| 3716 | ARL3_MOUSE  | Arl3    | ADP-ribosylation factor-like protein 3                                     | 0,45374   | 0,402798   |
| 3717 | COR1B_MOUSE | Coro1b  | Coronin-1B                                                                 | 0,789011  | -0,1881    |
| 3718 | COR1C_MOUSE | Coro1c  | Coronin-1C                                                                 | 1,42529   | 0,528622   |
| 3719 | SUCA_MOUSE  | Suclg1  | Succinate--CoA ligase [ADP/GDP-forming] subunit alpha, mitochondrial       | 0,802214  | -0,410253  |
| 3720 | UCHL5_MOUSE | Uchl5   | Ubiquitin carboxyl-terminal hydrolase isozyme L5                           | 0,266402  | -0,1111002 |
| 3721 | PREB_MOUSE  | Preb    | Prolactin regulatory element-binding protein                               | 0,203681  | 0,166021   |
| 3722 | ECI2_MOUSE  | Eci2    | Enoyl-CoA delta isomerase 2, mitochondrial                                 | 1,44588   | 0,745673   |
| 3723 | KAD4_MOUSE  | Ak4     | Adenylate kinase 4, mitochondrial                                          | 0,618685  | 0,548356   |
| 3724 | CATZ_MOUSE  | Ctsz    | Cathepsin Z                                                                | 0,814712  | 0,527401   |
| 3725 | ENTP5_MOUSE | Entpd5  | Ectonucleoside triphosphate diphosphohydrolase 5                           | 0,168187  | -0,183372  |
| 3726 | FA50A_MOUSE | Fam50a  | Protein FAM50A                                                             | 0,971858  | 0,367646   |
| 3727 | ARC1B_MOUSE | Arpc1b  | Actin-related protein 2/3 complex subunit 1B                               | 0,864564  | 0,262572   |
| 3728 | ASAH1_MOUSE | Asah1   | Acid ceramidase                                                            | 0,155704  | -0,0696484 |
| 3729 | VAPA_MOUSE  | Vapa    | Vesicle-associated membrane protein-associated protein A                   | 0,899595  | -0,752294  |
| 3730 | GSK3B_MOUSE | Gsk3b   | Glycogen synthase kinase-3 beta                                            | 0,889503  | 0,433144   |
| 3731 | DECR2_MOUSE | Decr2   | Peroxisomal 2,4-dienoyl-CoA reductase                                      | 0,171634  | 0,210611   |
| 3732 | SNX1_MOUSE  | Snx1    | Sorting nexin-1                                                            | 0,61992   | -0,372422  |
| 3733 | NDK3_MOUSE  | Nme3    | Nucleoside diphosphate kinase 3                                            | 0,504796  | -0,384934  |
| 3734 | T10B_MOUSE  | Timm10b | Mitochondrial import inner membrane translocase subunit Tim10 B            | 0,491584  | 0,52986    |
| 3735 | TIM9_MOUSE  | Timm9   | Mitochondrial import inner membrane translocase subunit Tim9               | 0,626091  | 0,397252   |
| 3736 | TIM8A_MOUSE | Timm8a1 | Mitochondrial import inner membrane translocase subunit Tim8 A             | 0,442632  | 0,384115   |
| 3737 | BUB3_MOUSE  | Bub3    | Mitotic checkpoint protein BUB3                                            | 1,28141   | 0,311586   |
| 3738 | TAGL2_MOUSE | Tagln2  | Transgelin-2                                                               | 0,125008  | 0,0513172  |
| 3739 | RBPMS_MOUSE | Rbpms   | RNA-binding protein with multiple splicing                                 | 0,772958  | 1,89584    |

|      |             |          |                                                                   |            |             |
|------|-------------|----------|-------------------------------------------------------------------|------------|-------------|
| 3740 | ORNT1_MOUSE | Slc25a15 | Mitochondrial ornithine transporter 1                             | 1,46543    | -0,634962   |
| 3741 | PACN2_MOUSE | Pacsin2  | Protein kinase C and casein kinase substrate in neurons protein 2 | 0,0287296  | -0,00924187 |
| 3742 | PSD13_MOUSE | Psmc13   | 26S proteasome non-ATPase regulatory subunit 13                   | 0,0367071  | 0,0202099   |
| 3743 | CBPQ_MOUSE  | Cpq      | Carboxypeptidase Q                                                | 0,0671763  | 0,0357693   |
| 3744 | EHD1_MOUSE  | Ehd1     | EH domain-containing protein 1                                    | 0,0471351  | -0,0214844  |
| 3745 | MAAI_MOUSE  | Gstz1    | Maleylacetoacetate isomerase                                      | 0,105231   | 0,0512672   |
| 3746 | STAT2_MOUSE | Stat2    | Signal transducer and activator of transcription 2                | 0,458434   | -0,865554   |
| 3747 | S12A7_MOUSE | Slc12a7  | Solute carrier family 12 member 7                                 | 0,461445   | -0,921795   |
| 3748 | APC7_MOUSE  | Anapc7   | Anaphase-promoting complex subunit 7                              | 0,73635    | 0,458334    |
| 3749 | AADAT_MOUSE | Aadat    | Kynurenine/alpha-aminoadipate aminotransferase, mitochondrial     | 0,310446   | -0,131392   |
| 3750 | MTNB_MOUSE  | Apip     | Methylthioribulose-1-phosphate dehydratase                        | 0,606259   | -0,381432   |
| 3751 | CAH14_MOUSE | Ca14     | Carbonic anhydrase 14                                             | 0,48041    | -0,409881   |
| 3752 | CELF2_MOUSE | Celf2    | CUGBP Elav-like family member 2                                   | 2,20958    | 0,65224     |
| 3753 | VNN1_MOUSE  | Vnn1     | Pantetheinase                                                     | 2,60823    | 1,44941     |
| 3754 | LICH_MOUSE  | Lipa     | Lysosomal acid lipase/cholesteryl ester hydrolase                 | 0,651883   | -0,989815   |
| 3755 | IF2G_MOUSE  | Eif2s3x  | Eukaryotic translation initiation factor 2 subunit 3, X-linked    | 1,03453    | 0,422683    |
| 3756 | IF2H_MOUSE  | Eif2s3y  | Eukaryotic translation initiation factor 2 subunit 3, Y-linked    | 0,985359   | 0,6         |
| 3757 | ITSN1_MOUSE | Itsn1    | Intersectin-1                                                     | 0,532578   | 0,262472    |
| 3758 | ITSN2_MOUSE | Itsn2    | Intersectin-2                                                     | 0,476536   | 0,399938    |
| 3759 | FADS2_MOUSE | Fads2    | Acyl-CoA 6-desaturase                                             | 2,10852    | 0,991335    |
| 3760 | BPNT1_MOUSE | Bpnt1    | 3'(2'),5'-bisphosphate nucleotidase 1                             | 0,820366   | 0,39427     |
| 3761 | ZO2_MOUSE   | Tjp2     | Tight junction protein ZO-2                                       | 0,312784   | 0,133317    |
| 3762 | NU160_MOUSE | Nup160   | Nuclear pore complex protein Nup160                               | 0,788068   | -0,757922   |
| 3763 | AIFM1_MOUSE | Aifm1    | Apoptosis-inducing factor 1, mitochondrial                        | 0,349976   | 0,317495    |
| 3764 | DCTN3_MOUSE | Dctn3    | Dynactin subunit 3                                                | 0,709949   | -1,7673     |
| 3765 | ADNP_MOUSE  | Adnp     | Activity-dependent neuroprotector homeobox protein                | 0,101426   | -0,0317898  |
| 3766 | STAU1_MOUSE | Stau1    | Double-stranded RNA-binding protein Staufen homolog 1             | 0,293919   | 0,211543    |
| 3767 | P5CS_MOUSE  | Aldh18a1 | Delta-1-pyrroline-5-carboxylate synthase                          | 0,793888   | 0,495255    |
| 3768 | PLF4_MOUSE  | Pf4      | Platelet factor 4                                                 | 0,930852   | 0,700634    |
| 3769 | HNRDL_MOUSE | Hnmpdl   | Heterogeneous nuclear ribonucleoprotein D-like                    | 0,130664   | -0,147016   |
| 3770 | COG1_MOUSE  | Cog1     | Conserved oligomeric Golgi complex subunit 1                      | 0,250561   | -0,23396    |
| 3771 | PLCB1_MOUSE | Plcb1    | 1-phosphatidylinositol 4,5-bisphosphate phosphodiesterase beta-1  | 0,170036   | -0,302483   |
| 3772 | EIF3G_MOUSE | Eif3g    | Eukaryotic translation initiation factor 3 subunit G              | 0,267582   | 0,17924     |
| 3773 | SAE2_MOUSE  | Uba2     | SUMO-activating enzyme subunit 2                                  | 1,12273    | 0,685062    |
| 3774 | VATC1_MOUSE | Atp6v1c1 | V-type proton ATPase subunit C 1                                  | 0,75051    | 0,414503    |
| 3775 | VPP1_MOUSE  | Atp6v0a1 | V-type proton ATPase 116 kDa subunit a isoform 1                  | 0,605262   | 0,321232    |
| 3776 | NFS1_MOUSE  | Nfs1     | Cysteine desulfurase, mitochondrial                               | 0,601994   | 0,146434    |
| 3777 | ARI1_MOUSE  | Arih1    | E3 ubiquitin-protein ligase ARIH1                                 | 2,07604    | 0,498802    |
| 3778 | ARI2_MOUSE  | Arih2    | E3 ubiquitin-protein ligase ARIH2                                 | 0,140768   | 0,0724846   |
| 3779 | KS6B2_MOUSE | Rps6kb2  | Ribosomal protein S6 kinase beta-2                                | 1,59426    | 0,444613    |
| 3780 | RED_MOUSE   | Ik       | Protein Red                                                       | 0,349207   | 0,13715     |
| 3781 | DX39B_MOUSE | Ddx39b   | Spliceosome RNA helicase Ddx39b                                   | 0,385188   | 0,168601    |
| 3782 | NDUA7_MOUSE | Ndufa7   | NADH dehydrogenase [ubiquinone] 1 alpha subcomplex subunit 7      | 0,718387   | 0,481554    |
| 3783 | KANK3_MOUSE | Kank3    | KN motif and ankyrin repeat domain-containing protein 3           | 0,110141   | 0,104699    |
| 3784 | ABHGA_MOUSE | Abhd16a  | Phosphatidylserine lipase ABHD16A                                 | 0,50091    | 0,164896    |
| 3785 | CLIC1_MOUSE | Clic1    | Chloride intracellular channel protein 1                          | 0,828058   | 0,246205    |
| 3786 | SYVC_MOUSE  | Vars     | Valine--tRNA ligase                                               | 0,95116    | 0,210938    |
| 3787 | BAG6_MOUSE  | Bag6     | Large proline-rich protein BAG6                                   | 0,523517   | 0,277671    |
| 3788 | APOM_MOUSE  | Apom     | Apolipoprotein M                                                  | 1,06808    | 0,37858     |
| 3789 | AP3B1_MOUSE | Ap3b1    | AP-3 complex subunit beta-1                                       | 1,41642    | 0,15208     |
| 3790 | TSP4_MOUSE  | Thbs4    | Thrombospondin-4                                                  | 0,130904   | 0,220282    |
| 3791 | ILF3_MOUSE  | Ilf3     | Interleukin enhancer-binding factor 3                             | 0,00852094 | -0,00598183 |



|      |              |          |                                                                 |           |            |
|------|--------------|----------|-----------------------------------------------------------------|-----------|------------|
| 3792 | TRIP6_MOUSE  | Trip6    | Thyroid receptor-interacting protein 6                          | 0,378702  | -0,51284   |
| 3793 | USO1_MOUSE   | Uso1     | General vesicular transport factor p115                         | 0,431697  | 0,13344    |
| 3794 | STRAP_MOUSE  | Strap    | Serine-threonine kinase receptor-associated protein             | 0,360241  | 0,14347    |
| 3795 | HNRPC_MOUSE  | Hnmpc    | Heterogeneous nuclear ribonucleoproteins C1/C2                  | 1,25376   | 0,334887   |
| 3796 | PX11B_MOUSE  | Pex11b   | Peroxisomal membrane protein 11B                                | 1,71338   | 0,691398   |
| 3797 | MOC2B_MOUSE  | Mocs2    | Molybdopterin synthase catalytic subunit                        | 0,476796  | 0,63034    |
| 3798 | FKBP9_MOUSE  | Fkbp9    | Peptidyl-prolyl cis-trans isomerase FKBP9                       | 0,668155  | 0,316656   |
| 3799 | BAZ1B_MOUSE  | Baz1b    | Tyrosine-protein kinase BAZ1B                                   | 1,57231   | 0,841904   |
| 3800 | ATE1_MOUSE   | Ate1     | Arginyl-tRNA--protein transferase 1                             | 0,58189   | 0,480737   |
| 3801 | MTM1_MOUSE   | Mtm1     | Myotubularin                                                    | 0,558151  | 0,28591    |
| 3802 | MTMR2_MOUSE  | Mtmr2    | Myotubularin-related protein 2                                  | 0,210555  | 0,0889141  |
| 3803 | SEI1L1_MOUSE | Sel1l    | Protein sel-1 homolog 1                                         | 0,57933   | 0,309701   |
| 3804 | HTAI2_MOUSE  | Htatip2  | Oxidoreductase HTATIP2                                          | 0,250436  | -0,0816216 |
| 3805 | LETM1_MOUSE  | Letm1    | Mitochondrial proton/calcium exchanger protein                  | 0,385373  | 0,201164   |
| 3806 | SUCB2_MOUSE  | Sucg2    | Succinate--CoA ligase [GDP-forming] subunit beta, mitochondrial | 0,43457   | -0,156327  |
| 3807 | SUCB1_MOUSE  | Sucla2   | Succinate--CoA ligase [ADP-forming] subunit beta, mitochondrial | 0,0247226 | 0,0188694  |
| 3808 | PMM2_MOUSE   | Pmm2     | Phosphomannomutase 2                                            | 1,28028   | 0,393249   |
| 3809 | ACL6A_MOUSE  | Actl6a   | Actin-like protein 6A                                           | 0,105846  | 0,0491535  |
| 3810 | RM40_MOUSE   | Mrpl40   | 39S ribosomal protein L40, mitochondrial                        | 0,562147  | -0,471907  |
| 3811 | U119A_MOUSE  | Unc119   | Protein unc-119 homolog A                                       | 2,43063   | 2,4093     |
| 3812 | PSA7_MOUSE   | Pasma7   | Proteasome subunit alpha type-7                                 | 0,473122  | -0,138553  |
| 3813 | PSA5_MOUSE   | Pasma5   | Proteasome subunit alpha type-5                                 | 0,299601  | 0,310252   |
| 3814 | PCKGC_MOUSE  | Pck1     | Phosphoenolpyruvate carboxykinase, cytosolic [GTP]              | 3,13945   | -0,817995  |
| 3815 | HDAC6_MOUSE  | Hdac6    | Histone deacetylase 6                                           | 0,272162  | 0,261075   |
| 3816 | DNPEP_MOUSE  | Dnpep    | Aspartyl aminopeptidase                                         | 1,11639   | 0,417139   |
| 3817 | HNRPF_MOUSE  | Hnrnpf   | Heterogeneous nuclear ribonucleoprotein F                       | 0,586052  | -0,410765  |
| 3818 | PSD10_MOUSE  | Psm10    | 26S proteasome non-ATPase regulatory subunit 10                 | 1,30636   | 1,46225    |
| 3819 | KEAP1_MOUSE  | Keap1    | Kelch-like ECH-associated protein 1                             | 1,79087   | 0,680231   |
| 3820 | PLPHP_MOUSE  | Plpbp    | Pyridoxal phosphate homeostasis protein                         | 0,576825  | 0,314813   |
| 3821 | MCAT_MOUSE   | Slc25a20 | Mitochondrial carnitine/acylcarnitine carrier protein           | 0,614874  | 0,26517    |
| 3822 | SNUT1_MOUSE  | Sart1    | U4/U6.U5 tri-snRNP-associated protein 1                         | 1,21419   | 0,786573   |
| 3823 | TOP3B_MOUSE  | Top3b    | DNA topoisomerase 3-beta-1                                      | 1,03996   | 0,237527   |
| 3824 | ITPR2_MOUSE  | Itpr2    | Inositol 1,4,5-trisphosphate receptor type 2                    | 0,927312  | -0,667368  |

## 5. Supplementary Table S5 (Proteomic analysis; Overview of all significantly altered pathways in the offspring by maternal diet)

| A list of significantly altered pathways in the offspring by maternal diet                                                                      |                          |                          |             |                      |                            |                            |            |                |  |
|-------------------------------------------------------------------------------------------------------------------------------------------------|--------------------------|--------------------------|-------------|----------------------|----------------------------|----------------------------|------------|----------------|--|
| Source: EnrichR database, ( <a href="https://maayanlab.cloud/Enrichr/">https://maayanlab.cloud/Enrichr/</a> ; accessed on: 12th december, 2021) |                          |                          |             |                      |                            |                            |            |                |  |
| Pathway: Wiki Pathway                                                                                                                           |                          |                          |             |                      |                            |                            |            |                |  |
| Term                                                                                                                                            | P-value                  | Adjusted P-value         | Old P-value | Old Adjusted P-value | Odds Ratio                 | Combined Score             | Genes      | Negative Log10 |  |
| Caloric restriction and aging WP4191                                                                                                            | 0,003196032              | 0.0325768524<br>87108024 | 0           | 0                    | 40.785.714.28<br>5.714.200 | 23.434.840.74<br>3.955.800 | IGF1       | 2,495<br>3889  |  |
| Trans-sulfuration pathway WP2333                                                                                                                | 0,003993646              | 0.0325768524<br>87108024 | 0           | 0                    | 3.171.904.761.<br>904.760  | 17.518.590.54<br>7.314.000 | CSA<br>D   | 2,398<br>6304  |  |
| Liver X receptor pathway WP2874                                                                                                                 | 0,003993646              | 0.0325768524<br>87108024 | 0           | 0                    | 3.171.904.761.<br>904.760  | 17.518.590.54<br>7.314.000 | CYP7<br>A1 | 2,398<br>6304  |  |
| Methionine metabolism leading to sulfur amino acids and related disorders WP4292                                                                | 0,004392244              | 0.0325768524<br>87108024 | 0           | 0                    | 28.545.714.28<br>5.714.200 | 154.943.708.7<br>75.113    | CSA<br>D   | 2,357<br>3135  |  |
| Bile acids synthesis and enterohepatic circulation WP4389                                                                                       | 0,004790703              | 0.0325768524<br>87108024 | 0           | 0                    | 2.594.935.064.<br>935.060  | 1.385.975.083.<br>259.070  | CYP7<br>A1 | 2,319<br>6007  |  |
| Genes targeted by miRNAs in adipocytes WP1992                                                                                                   | 0,005189022              | 0.0325768524<br>87108024 | 0           | 0                    | 23.785.714.28<br>5.714.200 | 1.251.416.370.<br>420.650  | IGF1       | 2,284<br>9145  |  |
| Cysteine and methionine catabolism WP4504                                                                                                       | 0,005985243              | 0.0325768524<br>87108024 | 0           | 0                    | 20.385.714.28<br>5.714.200 | 1.043.434.298.<br>452.160  | CSA<br>D   | 2,222<br>9182  |  |
| Drug Induction of Bile Acid Pathway WP2289                                                                                                      | 0,006780906              | 0.0325768524<br>87108024 | 0           | 0                    | 17.835.714.28<br>5.714.200 | 8.906.521.752.<br>159.380  | CYP7<br>A1 | 2,168<br>7123  |  |
| Extracellular vesicles in the crosstalk of cardiac cells WP4300                                                                                 | 0,007576012              | 0.0325768524<br>87108024 | 0           | 0                    | 15.852.380.95<br>2.380.900 | 7.740.350.338.<br>275.500  | IGF1       | 2,120<br>5593  |  |
| Farnesoid X receptor pathway WP2879                                                                                                             | 0,007576012              | 0.0325768524<br>87108024 | 0           | 0                    | 15.852.380.95<br>2.380.900 | 7.740.350.338.<br>275.500  | CYP7<br>A1 | 2,120<br>5593  |  |
| Methionine De Novo and Salvage Pathway WP3580                                                                                                   | 0,008767628              | 0.0332015260<br>13009026 | 0           | 0                    | 13.585.714.28<br>5.714.200 | 6.435.130.349.<br>149.830  | TAT        | 2,057<br>1179  |  |
| PPAR-alpha pathway WP2878                                                                                                                       | 0,010354502              | 0.0332015260<br>13009026 | 0           | 0                    | 11.409.714.28<br>5.714.200 | 5.214.620.402.<br>892.070  | CYP7<br>A1 | 1,984<br>8708  |  |
| 7-oxo-C and 7beta-HC pathways WP5064                                                                                                            | 0,010750873              | 0.0332015260<br>13009026 | 0           | 0                    | 1.097.032.967.<br>032.960  | 49.725.962.91<br>4.000.300 | CYP7<br>A1 | 1,968<br>5563  |  |
| Statin inhibition of cholesterol production WP430                                                                                               | 0,011543199              | 0.0332015260<br>13009026 | 0           | 0                    | 10.185.714.28<br>5.714.200 | 4.544.518.266.<br>085.440  | CYP7<br>A1 | 1,937<br>6738  |  |
| Oligodendrocyte specification and differentiation, leading to myelin components for CNS WP4304                                                  | 0,011939153              | 0.0332015260<br>13009026 | 0           | 0                    | 9.833.990.147.<br>783.250  | 435.442.406.2<br>27.662    | IGF1       | 1,923<br>0265  |  |
| Nuclear Receptors in Lipid Metabolism and Toxicity WP299                                                                                        | 0,013126185              | 0.0332015260<br>13009026 | 0           | 0                    | 8.910.714.285.<br>714.280  | 3.861.142.784.<br>895.610  | CYP7<br>A1 | 1,881<br>8615  |  |
| Fluoropyrimidine Activity WP1601                                                                                                                | 0,013126185              | 0.0332015260<br>13009026 | 0           | 0                    | 8.910.714.285.<br>714.280  | 3.861.142.784.<br>895.610  | UPP2       | 1,881<br>8615  |  |
| Factors and pathways affecting insulin-like growth factor (IGF1)-Akt signaling WP3850                                                           | 0,014706953              | 0.0351332760<br>4364505  | 0           | 0                    | 7.919.047.619.<br>047.610  | 3.341.390.605.<br>677.810  | IGF1       | 1,832<br>4773  |  |
| Oxysterols derived from cholesterol WP4545                                                                                                      | 0,018255584              | 0.0403233583<br>4993025  | 0           | 0                    | 6.332.380.952.<br>380.950  | 25.350.320.96<br>2.011.800 | CYP7<br>A1 | 1,738<br>6043  |  |
| Differentiation Pathway WP2848                                                                                                                  | 0,019042649              | 0.0403233583<br>4993025  | 0           | 0                    | 6.062.310.030.<br>395.130  | 24.013.259.45<br>6.270.100 | IGF1       | 1,720<br>2726  |  |
| One-carbon metabolism and related pathways WP3940                                                                                               | 0.02061512219<br>8689464 | 0.0403233583<br>4993025  | 0           | 0                    | 55.857.142.85<br>7.142.800 | 21.682.236.86<br>5.801.600 | CSA<br>D   |                |  |
| Cardiac Progenitor Differentiation WP2406                                                                                                       | 0.02100789576<br>309119  | 0.0403233583<br>4993025  | 0           | 0                    | 5.478.021.978.<br>021.970  | 21.160.815.12<br>3.277.500 | IGF1       |                |  |
| Cardiac Hypertrophic Response WP2795                                                                                                            | 0.02179302948<br>367254  | 0.0403233583<br>4993025  | 0           | 0                    | 5.274.603.174.<br>603.170  | 2.018.150.262.<br>928.950  | IGF1       |                |  |
| Oxidation by Cytochrome P450 WP43                                                                                                               | 0.02414512629<br>3327844 | 0.0403233583<br>4993025  | 0           | 0                    | 47.457.142.85<br>7.142.800 | 17.671.486.86<br>5.577.200 | CYP7<br>A1 |                |  |
| Lung fibrosis WP3624                                                                                                                            | 0.02492805820<br>599394  | 0.0403233583<br>4993025  | 0           | 0                    | 4.592.165.898.<br>617.510  | 1.695.318.022.<br>982.440  | IGF1       |                |  |
| Endochondral Ossification with Skeletal Dysplasias WP4808                                                                                       | 0.02531931803<br>3677134 | 0.0403233583<br>4993025  | 0           | 0                    | 4.519.047.619.<br>047.610  | 16.612.866.89<br>3.112.000 | IGF1       |                |  |
| Endochondral Ossification WP474                                                                                                                 | 0.02531931803<br>3677134 | 0.0403233583<br>4993025  | 0           | 0                    | 4.519.047.619.<br>047.610  | 16.612.866.89<br>3.112.000 | IGF1       |                |  |
| PPAR signaling pathway WP3942                                                                                                                   | 0.02649227347<br>1440286 | 0.0406845628<br>3114044  | 0           | 0                    | 4.312.987.012.<br>987.010  | 1.566.003.384.<br>261.290  | CYP7<br>A1 |                |  |
| MECP2 and Associated Rett Syndrome WP3584                                                                                                       | 0.02844445487<br>658815  | 0.0421762606<br>7907898  | 0           | 0                    | 4.008.249.496.<br>981.890  | 14.268.574.75<br>6.562.200 | IGF1       |                |  |
| EGFR Tyrosine Kinase Inhibitor Resistance WP4806                                                                                                | 0.03311572207<br>601827  | 0.0444992515<br>3964955  | 0           | 0                    | 3.426.678.141.<br>135.970  | 116.772.525.7<br>40.896    | IGF1       |                |  |
| MicroRNAs in cardiomyocyte hypertrophy WP1544                                                                                                   | 0.03311572207<br>601827  | 0.0444992515<br>3964955  | 0           | 0                    | 3.426.678.141.<br>135.970  | 116.772.525.7<br>40.896    | IGF1       |                |  |
| Apoptosis WP254                                                                                                                                 | 0.03311572207<br>601827  | 0.0444992515<br>3964955  | 0           | 0                    | 3.426.678.141.<br>135.970  | 116.772.525.7<br>40.896    | IGF1       |                |  |
| Amino Acid metabolism WP3925                                                                                                                    | 0.03583154305<br>979738  | 0.0466895864<br>11251136 | 0           | 0                    | 31.590.476.19<br>0.476.100 | 10.516.237.91<br>0.185.800 | TAT        |                |  |
| Senescence and Autophagy in Cancer WP615                                                                                                        | 0.04124316886<br>35261   | 0.0521604782<br>6857713  | 0           | 0                    | 27.318.681.31<br>8.681.300 | 8.709.932.616.<br>586.790  | IGF1       |                |  |

## 5. Supplementary Table S5 (Proteomic analysis; Overview of all significantly altered pathways in the offspring by maternal diet)

|                                                       |                          |                          |             |                      |                            |                            |            |               |  |
|-------------------------------------------------------|--------------------------|--------------------------|-------------|----------------------|----------------------------|----------------------------|------------|---------------|--|
| Adipogenesis WP236                                    | 0.05084071155<br>533055  | 0.0616391508<br>61224734 | 0           | 0                    | 21.996.677.74<br>0.863.700 | 6.552.937.520.<br>714.520  | IGF1       |               |  |
| Angiotensin Like Protein 8 Regulatory Pathway WP3915  | 0.05160487048<br>846722  | 0.0616391508<br>61224734 | 0           | 0                    | 2.165.866.957.<br>470.010  | 641.993.119.7<br>48.582    | CYP7<br>A1 |               |  |
| Breast cancer pathway WP4262                          | 0.05997515874<br>305551  | 0.0697008601<br>6084828  | 0           | 0                    | 18.523.809.52<br>3.809.500 | 521.227.550.6<br>27.593    | IGF1       |               |  |
| Vitamin D Receptor Pathway WP2877                     | 0.07053472095<br>805195  | 0.0781827330<br>5050236  | 0           | 0                    | 15.636.148.38<br>2.004.700 | 41.461.595.89<br>9.019.500 | CYP7<br>A1 |               |  |
| Metapathway biotransformation Phase I and II WP702    | 0.07090992067<br>371144  | 0.0781827330<br>5050236  | 0           | 0                    | 1.554.945.054.<br>945.050  | 4.114.920.963.<br>136.880  | CYP7<br>A1 |               |  |
| Focal Adhesion WP306                                  | 0.07652203515<br>417907  | 0.0822611877<br>907425   | 0           | 0                    | 14.354.604.78<br>6.076.800 | 3.689.386.843.<br>909.950  | IGF1       |               |  |
| Focal Adhesion-PI3K-Akt-mTOR-signaling pathway WP3932 | 0.11498318292<br>16247   | 0.1205921186<br>7389907  | 0           | 0                    | 9.314.096.499.<br>526.960  | 2.014.610.568.<br>709.960  | IGF1       |               |  |
| Nuclear Receptors Meta-Pathway WP2882                 | 0.12071910500<br>86845   | 0.1235933694<br>1365318  | 0           | 0                    | 8.838.274.932.<br>614.550  | 18.686.666.39<br>3.634.900 | CYP7<br>A1 |               |  |
| PI3K-Akt signaling pathway WP4172                     | 0.12819812359<br>74174   | 0.1281981235<br>974174   | 0           | 0                    | 8.281.921.618.<br>204.800  | 170.125.442.5<br>94.961    | IGF1       |               |  |
|                                                       |                          |                          |             |                      |                            |                            |            |               |  |
|                                                       |                          |                          |             |                      |                            |                            |            |               |  |
| <b>KEGG Pathway</b>                                   |                          |                          |             |                      |                            |                            |            |               |  |
| Term                                                  | P-value                  | Adjusted P-value         | Old P-value | Old Adjusted P-value | Odds Ratio                 | Combined Score             | Gene s     |               |  |
| Phenylalanine, tyrosine and tryptophan biosynthesis   | 0,002397859              | 0.0623843353<br>8489801  | 0           | 0                    | 5.710.571.428.<br>571.420  | 34.452.899.82<br>6.083.200 | TAT        | 2,620<br>1764 |  |
| Taurine and hypotaurine metabolism                    | 0,004392244              | 0.0623843353<br>8489801  | 0           | 0                    | 28.545.714.28<br>5.714.200 | 154.943.708.7<br>75.113    | CSA<br>D   | 2,357<br>3135 |  |
| Ubiquinone and other terpenoid-quinone biosynthesis   | 0,004392244              | 0.0623843353<br>8489801  | 0           | 0                    | 28.545.714.28<br>5.714.200 | 154.943.708.7<br>75.113    | TAT        | 2,357<br>3135 |  |
| Phenylalanine metabolism                              | 0,006780906              | 0.0623843353<br>8489801  | 0           | 0                    | 17.835.714.28<br>5.714.200 | 8.906.521.752.<br>159.380  | TAT        | 2,168<br>7123 |  |
| Primary bile acid biosynthesis                        | 0,006780906              | 0.0623843353<br>8489801  | 0           | 0                    | 17.835.714.28<br>5.714.200 | 8.906.521.752.<br>159.380  | CYP7<br>A1 | 2,168<br>7123 |  |
| Asthma                                                | 0,012334969              | 0.0678650023<br>5638772  | 0           | 0                    | 9.505.714.285.<br>714.280  | 4.178.062.796.<br>500.490  | PRG<br>2   | 1,908<br>8619 |  |
| Tyrosine metabolism                                   | 0,014311969              | 0.0678650023<br>5638772  | 0           | 0                    | 8.145.714.285.<br>714.280  | 34.592.071.94<br>0.977.700 | TAT        | 1,844<br>3006 |  |
| Aldosterone-regulated sodium reabsorption             | 0,014706953              | 0.0678650023<br>5638772  | 0           | 0                    | 7.919.047.619.<br>047.610  | 3.341.390.605.<br>677.810  | IGF1       | 1,832<br>4773 |  |
| Cysteine and methionine metabolism                    | 0,019829161              | 0.0678650023<br>5638772  | 0           | 0                    | 58.142.857.14<br>2.857.100 | 2.279.549.801.<br>512.960  | TAT        | 1,702<br>6957 |  |
| Cholesterol metabolism                                | 0,019829161              | 0.0678650023<br>5638772  | 0           | 0                    | 58.142.857.14<br>2.857.100 | 2.279.549.801.<br>512.960  | CYP7<br>A1 | 1,702<br>6957 |  |
| Ovarian steroidogenesis                               | 0.02022221077<br>4875234 | 0.0678650023<br>5638772  | 0           | 0                    | 5.697.714.285.<br>714.280  | 22.226.633.77<br>9.925.100 | IGF1       | #WER<br>T!    |  |
| Pyrimidine metabolism                                 | 0.02218538971<br>9098877 | 0.0678650023<br>5638772  | 0           | 0                    | 51.784.415.58<br>4.415.500 | 19.721.169.43<br>0.337.900 | UPP2       | #WER<br>T!    |  |
| Long-term depression                                  | 0.02375345412<br>1096102 | 0.0678650023<br>5638772  | 0           | 0                    | 4.826.392.251.<br>815.980  | 18.050.838.89<br>0.404.800 | IGF1       | #WER<br>T!    |  |
| Steroid hormone biosynthesis                          | 0.02414512629<br>3327844 | 0.0678650023<br>5638772  | 0           | 0                    | 47.457.142.85<br>7.142.800 | 17.671.486.86<br>5.577.200 | CYP7<br>A1 | #WER<br>T!    |  |
| Melanoma                                              | 0.02844445487<br>658815  | 0.0678650023<br>5638772  | 0           | 0                    | 4.008.249.496.<br>981.890  | 14.268.574.75<br>6.562.200 | IGF1       | #WER<br>T!    |  |
| p53 signaling pathway                                 | 0,02883448               | 0.0678650023<br>5638772  | 0           | 0                    | 39.523.809.52<br>3.809.500 | 14.015.867.68<br>4.434.900 | IGF1       | 1,540<br>0879 |  |
| PPAR signaling pathway                                | 0,029224368              | 0.0678650023<br>5638772  | 0           | 0                    | 38.980.430.52<br>8.375.700 | 13.770.820.95<br>5.371.100 | CYP7<br>A1 | 1,534<br>2549 |  |
| Glioma                                                | 0.02961411892<br>6114725 | 0.0678650023<br>5638772  | 0           | 0                    | 3.845.173.745.<br>173.740  | 13.533.104.53<br>3.059.200 | IGF1       | #WER<br>T!    |  |
| Hypertrophic cardiomyopathy                           | 0.03544397773<br>863309  | 0.0678650023<br>5638772  | 0           | 0                    | 31.947.030.49<br>7.592.200 | 1.066.967.538.<br>219.120  | IGF1       | #WER<br>T!    |  |
| Bile secretion                                        | 0.03544397773<br>863309  | 0.0678650023<br>5638772  | 0           | 0                    | 31.947.030.49<br>7.592.200 | 1.066.967.538.<br>219.120  | CYP7<br>A1 | #WER<br>T!    |  |
| Dilated cardiomyopathy                                | 0.03776732657<br>425956  | 0.0678650023<br>5638772  | 0           | 0                    | 299.203.007.5<br>18.797    | 9.802.820.827.<br>717.790  | IGF1       | #WER<br>T!    |  |
| Prostate cancer                                       | 0.03815407494<br>862228  | 0.0678650023<br>5638772  | 0           | 0                    | 29.607.142.85<br>7.142.800 | 967.005.617.5<br>56.944    | IGF1       | #WER<br>T!    |  |
| Inflammatory mediator regulation of TRP channels      | 0.03854068730<br>993136  | 0.0678650023<br>5638772  | 0           | 0                    | 2.930.044.182.<br>621.500  | 9.540.343.353.<br>076.330  | IGF1       | #WER<br>T!    |  |
| Progesterone-mediated oocyte maturation               | 0.03931350415<br>205654  | 0.0678650023<br>5638772  | 0           | 0                    | 28.705.627.70<br>5.627.700 | 9.289.678.500.<br>716.380  | IGF1       | #WER<br>T!    |  |
| Pancreatic secretion                                  | 0.04008577742<br>562173  | 0.0678650023<br>5638772  | 0           | 0                    | 28.134.370.57<br>9.915.100 | 905.007.775.5<br>76.607    | PRS<br>S2  | #WER<br>T!    |  |
| Longevity regulating pathway                          | 0.04008577742<br>562173  | 0.0678650023<br>5638772  | 0           | 0                    | 28.134.370.57<br>9.915.100 | 905.007.775.5<br>76.607    | IGF1       | #WER<br>T!    |  |
| Protein digestion and absorption                      | 0.04047171032<br>468564  | 0.0678650023<br>5638772  | 0           | 0                    | 27.857.142.85<br>7.142.800 | 8.934.209.308.<br>449.350  | PRS<br>S2  | #WER<br>T!    |  |
| Drug metabolism                                       | 0.04239933910<br>860823  | 0.0678650023<br>5638772  | 0           | 0                    | 26.548.731.64<br>2.189.500 | 8.391.051.867.<br>901.870  | UPP2       | #WER<br>T!    |  |
| HIF-1 signaling pathway                               | 0.04278445800<br>7287904 | 0.0678650023<br>5638772  | 0           | 0                    | 263.015.873.0<br>15.873    | 8.289.156.631.<br>877.400  | IGF1       | #WER<br>T!    |  |
| Growth hormone synthesis, secretion and action        | 0,0466282                | 0.0697594900<br>843374   | 0           | 0                    | 2.406.053.268.<br>765.130  | 7.375.876.051.<br>746.780  | IGF1       | 1,331<br>3514 |  |
| AMPK signaling pathway                                | 0,04701183               | 0.0697594900<br>843374   | 0           | 0                    | 23.857.142.85<br>7.142.800 | 7.293.977.888.<br>059.270  | IGF1       | 1,327<br>7928 |  |
| Oocyte meiosis                                        | 0.05045843011<br>5721514 | 0.0714015601<br>0598374  | 0           | 0                    | 22.169.642.85<br>7.142.800 | 6.621.197.613.<br>100.180  | IGF1       | #WER<br>T!    |  |

### 5. Supplementary Table S5 (Proteomic analysis; Overview of all significantly altered pathways in the offspring by maternal diet)

|                                                                                                                                                                                   |                         |                          |             |                      |                            |                            |              |               |  |
|-----------------------------------------------------------------------------------------------------------------------------------------------------------------------------------|-------------------------|--------------------------|-------------|----------------------|----------------------------|----------------------------|--------------|---------------|--|
| FoxO signaling pathway                                                                                                                                                            | 0.051222858             | 0.0714015601<br>0598374  | 0           | 0                    | 21.826.373.62<br>6.373.600 | 6.485.858.386.<br>485.300  | IGF1         | 1,290<br>5362 |  |
| Signaling pathways regulating pluripotency of stem cells                                                                                                                          | 0.05579813022<br>483266 | 0.0753334440<br>8071158  | 0           | 0                    | 19.969.818.91<br>3.480.800 | 5.763.319.530.<br>748.080  | IGF1         | #WER<br>T!    |  |
| Breast cancer                                                                                                                                                                     | 0.05731892484<br>401968 | 0.0753334440<br>8071158  | 0           | 0                    | 19.418.786.69<br>2.759.200 | 55.520.727.49<br>7.935.700 | IGF1         |               |  |
| mTOR signaling pathway                                                                                                                                                            | 0.05997515874<br>305551 | 0.0766349250<br>6057092  | 0           | 0                    | 18.523.809.52<br>3.809.500 | 521.227.550.6<br>27.593    | IGF1         |               |  |
| Influenza A                                                                                                                                                                       | 0.06677542588<br>09193  | 0.0830180970<br>4114291  | 0           | 0                    | 1.655.889.724.<br>310.770  | 4.481.533.303.<br>064.930  | PRS<br>S2    |               |  |
| Transcriptional misregulation in cancer                                                                                                                                           | 0.07428075901<br>853666 | 0.0899188135<br>487549   | 0           | 0                    | 1.481.002.243.<br>829.460  | 3.850.462.656.<br>889.650  | IGF1         |               |  |
| Focal adhesion                                                                                                                                                                    | 0.07764089162<br>771914 | 0.0908672193<br>1389949  | 0           | 0                    | 14.137.142.85<br>7.142.800 | 3.612.974.516.<br>911.650  | IGF1         |               |  |
| Proteoglycans in cancer                                                                                                                                                           | 0.07913085511<br>201665 | 0.0908672193<br>1389949  | 0           | 0                    | 13.857.142.85<br>7.142.800 | 3.515.075.472.<br>727.730  | IGF1         |               |  |
| Rap1 signaling pathway                                                                                                                                                            | 0.08099034764<br>934519 | 0.0908672193<br>1389949  | 0           | 0                    | 13.522.214.62<br>7.477.700 | 3.398.707.630.<br>579.840  | IGF1         |               |  |
| Ras signaling pathway                                                                                                                                                             | 0.08913314087<br>389414 | 0.0976220114<br>3331263  | 0           | 0                    | 12.220.779.22<br>0.779.200 | 29.545.249.90<br>3.179.500 | IGF1         |               |  |
| MAPK signaling pathway                                                                                                                                                            | 0.11174236079<br>929967 | 0.1195383394<br>5971591  | 0           | 0                    | 96.045.831.30<br>1.804     | 2.104.901.451.<br>466.680  | IGF1         |               |  |
| Neuroactive ligand-receptor interaction                                                                                                                                           | 0.12855287461<br>902729 | 0.1343961871<br>0171033  | 0           | 0                    | 8.257.142.857.<br>142.850  | 16.938.826.57<br>9.242.500 | PRS<br>S2    |               |  |
| PI3K-Akt signaling pathway                                                                                                                                                        | 0.13315315703<br>66007  | 0.1361121160<br>8185847  | 0           | 0                    | 7.947.794.415.<br>216.510  | 16.024.782.26<br>8.271.000 | IGF1         |               |  |
| Pathways in cancer                                                                                                                                                                | 0.19370711172<br>776245 | 0.1937071117<br>2776245  | 0           | 0                    | 5.245.822.102.<br>425.870  | 8.610.534.334.<br>425.610  | IGF1         |               |  |
|                                                                                                                                                                                   |                         |                          |             |                      |                            |                            |              |               |  |
|                                                                                                                                                                                   |                         |                          |             |                      |                            |                            |              |               |  |
|                                                                                                                                                                                   |                         |                          |             |                      |                            |                            |              |               |  |
|                                                                                                                                                                                   |                         |                          |             |                      |                            |                            |              |               |  |
|                                                                                                                                                                                   |                         |                          |             |                      |                            |                            |              |               |  |
|                                                                                                                                                                                   |                         |                          |             |                      |                            |                            |              |               |  |
|                                                                                                                                                                                   |                         |                          |             |                      |                            |                            |              |               |  |
|                                                                                                                                                                                   |                         |                          |             |                      |                            |                            |              |               |  |
| GO Molecular Function                                                                                                                                                             |                         |                          |             |                      |                            |                            |              |               |  |
|                                                                                                                                                                                   |                         |                          |             |                      |                            |                            |              |               |  |
|                                                                                                                                                                                   |                         |                          |             |                      |                            |                            |              |               |  |
| Term                                                                                                                                                                              | P-value                 | Adjusted P-value         | Old P-value | Old Adjusted P-value | Odds Ratio                 | Combined Score             | Genes        |               |  |
| insulin-like growth factor receptor binding (GO:0005159)                                                                                                                          | 0,005587202             | 0.0362443164<br>0160541  | 0           | 0                    | 21.954.945.05<br>4.945.000 | 11.388.637.28<br>0.375.100 | IGF1         | 2,252<br>8056 |  |
| carboxy-lyase activity (GO:0016831)                                                                                                                                               | 0,009164555             | 0.0362443164<br>0160541  | 0           | 0                    | 12.967.532.46<br>7.532.400 | 6.084.900.471.<br>331.720  | CSDA         | 2,037<br>8886 |  |
| steroid hydroxylase activity (GO:0008395)                                                                                                                                         | 0,014311969             | 0.0362443164<br>0160541  | 0           | 0                    | 8.145.714.285.<br>714.280  | 34.592.071.94<br>0.977.700 | CYP7A1       | 1,844<br>3006 |  |
| oxidoreductase activity, acting on paired donors, with incorporation or reduction of molecular oxygen, NAD(P)H as one donor, and incorporation of one atom of oxygen (GO:0016709) | 0,014311969             | 0.0362443164<br>0160541  | 0           | 0                    | 8.145.714.285.<br>714.280  | 34.592.071.94<br>0.977.700 | CYP7A1       | 1,844<br>3006 |  |
| pentosyltransferase activity (GO:0016763)                                                                                                                                         | 0,015101799             | 0.0362443164<br>0160541  | 0           | 0                    | 7.704.633.204.<br>633.200  | 3.230.507.581.<br>480.840  | UPP2         | 1,820<br>9713 |  |
| hormone activity (GO:0005179)                                                                                                                                                     | 0,030782551             | 0.0615651014<br>7875503  | 0           | 0                    | 3.694.805.194.<br>805.190  | 1.286.090.483.<br>496.380  | IGF1         | 1,511<br>6954 |  |
| serine-type endopeptidase activity (GO:0004252)                                                                                                                                   | 0,041243169             | 0.0707025751<br>9461617  | 0           | 0                    | 27.318.681.31<br>8.681.300 | 8.709.932.616.<br>586.790  | PRS<br>S2    | 1,384<br>648  |  |
| serine-type peptidase activity (GO:0008236)                                                                                                                                       | 0,048927957             | 0.0733919352<br>3442711  | 0           | 0                    | 22.889.400.92<br>1.658.900 | 690.666.232.6<br>97.606    | PRS<br>S2    | 1,310<br>4429 |  |
| receptor ligand activity (GO:0048018)                                                                                                                                             | 0,116420224             | 0.1429446512<br>85175    | 0           | 0                    | 919.047.619.0<br>47.619    | 19.764.569.49<br>0.964.600 | IGF1         | 0,933<br>9716 |  |
| endopeptidase activity (GO:0004175)                                                                                                                                               | 0,119288183             | 0.1429446512<br>85175    | 0           | 0                    | 8.952.684.258.<br>416.740  | 19.035.313.74<br>5.752.000 | PRS<br>S2    | 0,923<br>4026 |  |
| calcium ion binding (GO:0005509)                                                                                                                                                  | 0.13103259701<br>141043 | 0.1429446512<br>85175    | 0           | 0                    | 8.087.690.407.<br>575.130  | 16.436.687.25<br>4.775.500 | PRS<br>S2    |               |  |
| metal ion binding (GO:0046872)                                                                                                                                                    | 0.18905619939<br>244717 | 0.1890561993<br>9244717  | 0           | 0                    | 5.392.026.578.<br>073.080  | 8.981.557.750.<br>667.950  | PRS<br>S2    |               |  |
|                                                                                                                                                                                   |                         |                          |             |                      |                            |                            |              |               |  |
|                                                                                                                                                                                   |                         |                          |             |                      |                            |                            |              |               |  |
|                                                                                                                                                                                   |                         |                          |             |                      |                            |                            |              |               |  |
|                                                                                                                                                                                   |                         |                          |             |                      |                            |                            |              |               |  |
| GO Biological Process                                                                                                                                                             |                         |                          |             |                      |                            |                            |              |               |  |
|                                                                                                                                                                                   |                         |                          |             |                      |                            |                            |              |               |  |
|                                                                                                                                                                                   |                         |                          |             |                      |                            |                            |              |               |  |
|                                                                                                                                                                                   |                         |                          |             |                      |                            |                            |              |               |  |
| Term                                                                                                                                                                              | P-value                 | Adjusted P-value         | Old P-value | Old Adjusted P-value | Odds Ratio                 | Combined Score             | Genes        |               |  |
| positive regulation of cell growth (GO:0030307)                                                                                                                                   | 7,07E-04                | 0.0292260289<br>22216006 | 0           | 0                    | 6.630.666.666.<br>666.660  | 48.103.292.88<br>6.084.700 | 3,150<br>642 |               |  |
| negative regulation of smooth muscle cell apoptotic process (GO:0034392)                                                                                                          | 0,001998563             | 0.0292260289<br>22216006 | 0           | 0                    | 7.138.571.428.<br>571.420  | 4.436.855.317.<br>641.390  | IGF1         | 2,699<br>2821 |  |

## 5. Supplementary Table S5 (Proteomic analysis; Overview of all significantly altered pathways in the offspring by maternal diet)

|                                                                                           |                           |                          |   |   |                            |                            |            |               |  |
|-------------------------------------------------------------------------------------------|---------------------------|--------------------------|---|---|----------------------------|----------------------------|------------|---------------|--|
| positive regulation of glycoprotein metabolic process (GO:1903020)                        | 0,001998563               | 0.0292260289<br>22216006 | 0 | 0 | 7.138.571.428.<br>571.420  | 4.436.855.317.<br>641.390  | IGF1       | 2,699<br>2821 |  |
| taurine metabolic process (GO:0019530)                                                    | 0,002397859               | 0.0292260289<br>22216006 | 0 | 0 | 5.710.571.428.<br>571.420  | 34.452.899.82<br>6.083.200 | CSA<br>D   | 2,620<br>1764 |  |
| tyrosine catabolic process (GO:0006572)                                                   | 0,002397859               | 0.0292260289<br>22216006 | 0 | 0 | 5.710.571.428.<br>571.420  | 34.452.899.82<br>6.083.200 | TAT        | 2,620<br>1764 |  |
| regulation of vascular associated smooth muscle cell apoptotic process (GO:1905459)       | 0,002797015               | 0.0292260289<br>22216006 | 0 | 0 | 47.585.714.28<br>5.714.200 | 27.976.605.00<br>2.155.400 | IGF1       | 2,553<br>3052 |  |
| regulation of bile acid metabolic process (GO:1904251)                                    | 0,002797015               | 0.0292260289<br>22216006 | 0 | 0 | 47.585.714.28<br>5.714.200 | 27.976.605.00<br>2.155.400 | CYP7<br>A1 | 2,553<br>3052 |  |
| positive regulation of insulin-like growth factor receptor signaling pathway (GO:0043568) | 0,003196032               | 0.0292260289<br>22216006 | 0 | 0 | 40.785.714.28<br>5.714.200 | 23.434.840.74<br>3.955.800 | IGF1       | 2,495<br>3889 |  |
| negative regulation of muscle cell apoptotic process (GO:0010656)                         | 0,003196032               | 0.0292260289<br>22216006 | 0 | 0 | 40.785.714.28<br>5.714.200 | 23.434.840.74<br>3.955.800 | IGF1       | 2,495<br>3889 |  |
| regulation of smooth muscle cell apoptotic process (GO:0034391)                           | 0,003594909               | 0.0292260289<br>22216006 | 0 | 0 | 35.685.714.28<br>5.714.200 | 20.084.764.65<br>9.134.400 | IGF1       | 2,444<br>3121 |  |
| sterol catabolic process (GO:0016127)                                                     | 0.00359490866<br>6217628  | 0.0292260289<br>22216006 | 0 | 0 | 35.685.714.28<br>5.714.200 | 20.084.764.65<br>9.134.400 | CYP7<br>A1 | #WER<br>TI    |  |
| cholesterol catabolic process (GO:0006707)                                                | 0.00359490866<br>6217628  | 0.0292260289<br>22216006 | 0 | 0 | 35.685.714.28<br>5.714.200 | 20.084.764.65<br>9.134.400 | CYP7<br>A1 |               |  |
| regulation of glycoprotein biosynthetic process (GO:0010559)                              | 0.00399364626<br>13403625 | 0.0292260289<br>22216006 | 0 | 0 | 3.171.904.761.<br>904.760  | 17.518.590.54<br>7.314.000 | IGF1       |               |  |
| regulation of bile acid biosynthetic process (GO:0070857)                                 | 0.00399364626<br>13403625 | 0.0292260289<br>22216006 | 0 | 0 | 3.171.904.761.<br>904.760  | 17.518.590.54<br>7.314.000 | CYP7<br>A1 |               |  |
| nucleoside metabolic process (GO:0009116)                                                 | 0.00399364626<br>13403625 | 0.0292260289<br>22216006 | 0 | 0 | 3.171.904.761.<br>904.760  | 17.518.590.54<br>7.314.000 | UPP2       |               |  |
| alcohol catabolic process (GO:0046164)                                                    | 0.00439224439<br>6163033  | 0.0292260289<br>22216006 | 0 | 0 | 28.545.714.28<br>5.714.200 | 154.943.708.7<br>75.113    | CYP7<br>A1 |               |  |
| pyrimidine nucleoside catabolic process (GO:0046135)                                      | 0.00439224439<br>6163033  | 0.0292260289<br>22216006 | 0 | 0 | 28.545.714.28<br>5.714.200 | 154.943.708.7<br>75.113    | UPP2       |               |  |
| pyrimidine nucleoside salvage (GO:0043097)                                                | 0.00439224439<br>6163033  | 0.0292260289<br>22216006 | 0 | 0 | 28.545.714.28<br>5.714.200 | 154.943.708.7<br>75.113    | UPP2       |               |  |
| pyrimidine-containing compound salvage (GO:0008655)                                       | 0.00439224439<br>6163033  | 0.0292260289<br>22216006 | 0 | 0 | 28.545.714.28<br>5.714.200 | 154.943.708.7<br>75.113    | UPP2       |               |  |
| myotube cell development (GO:0014904)                                                     | 0.00439224439<br>6163033  | 0.0292260289<br>22216006 | 0 | 0 | 28.545.714.28<br>5.714.200 | 154.943.708.7<br>75.113    | IGF1       |               |  |
| insulin-like growth factor receptor signaling pathway (GO:0048009)                        | 0.00439224439<br>6163033  | 0.0292260289<br>22216006 | 0 | 0 | 28.545.714.28<br>5.714.200 | 154.943.708.7<br>75.113    | IGF1       |               |  |
| cellular response to cholesterol (GO:0071397)                                             | 0.00439224439<br>6163033  | 0.0292260289<br>22216006 | 0 | 0 | 28.545.714.28<br>5.714.200 | 154.943.708.7<br>75.113    | CYP7<br>A1 |               |  |
| nucleoside catabolic process (GO:0009164)                                                 | 0.00479070309<br>341298   | 0.0292260289<br>22216006 | 0 | 0 | 2.594.935.064.<br>935.060  | 1.385.975.083.<br>259.070  | UPP2       |               |  |
| nucleoside salvage (GO:0043174)                                                           | 0.00479070309<br>341298   | 0.0292260289<br>22216006 | 0 | 0 | 2.594.935.064.<br>935.060  | 1.385.975.083.<br>259.070  | UPP2       |               |  |
| tyrosine metabolic process (GO:0006570)                                                   | 0.00479070309<br>341298   | 0.0292260289<br>22216006 | 0 | 0 | 2.594.935.064.<br>935.060  | 1.385.975.083.<br>259.070  | TAT        |               |  |
| positive regulation of calcineurin-mediated signaling (GO:0106058)                        | 0.00518902237<br>9499861  | 0.0292260289<br>22216006 | 0 | 0 | 23.785.714.28<br>5.714.200 | 1.251.416.370.<br>420.650  | IGF1       |               |  |
| positive regulation of calcineurin-NFAT signaling cascade (GO:0070886)                    | 0.00518902237<br>9499861  | 0.0292260289<br>22216006 | 0 | 0 | 23.785.714.28<br>5.714.200 | 1.251.416.370.<br>420.650  | IGF1       |               |  |
| pyrimidine deoxyribonucleotide catabolic process (GO:0009223)                             | 0.00518902237<br>9499861  | 0.0292260289<br>22216006 | 0 | 0 | 23.785.714.28<br>5.714.200 | 1.251.416.370.<br>420.650  | UPP2       |               |  |
| 2-oxoglutarate metabolic process (GO:0006103)                                             | 0.00558720228<br>37974    | 0.0292260289<br>22216006 | 0 | 0 | 21.954.945.05<br>4.945.000 | 11.388.637.28<br>0.375.100 | TAT        |               |  |
| pyrimidine nucleoside biosynthetic process (GO:0046134)                                   | 0.00558720228<br>37974    | 0.0292260289<br>22216006 | 0 | 0 | 21.954.945.05<br>4.945.000 | 11.388.637.28<br>0.375.100 | UPP2       |               |  |
| positive regulation of glycogen biosynthetic process (GO:0045725)                         | 0.00558720228<br>37974    | 0.0292260289<br>22216006 | 0 | 0 | 21.954.945.05<br>4.945.000 | 11.388.637.28<br>0.375.100 | IGF1       |               |  |
| positive regulation of glycoprotein biosynthetic process (GO:0010560)                     | 0.00558720228<br>37974    | 0.0292260289<br>22216006 | 0 | 0 | 21.954.945.05<br>4.945.000 | 11.388.637.28<br>0.375.100 | IGF1       |               |  |
| negative regulation of neuroinflammatory response (GO:0150079)                            | 0.00558720228<br>37974    | 0.0292260289<br>22216006 | 0 | 0 | 21.954.945.05<br>4.945.000 | 11.388.637.28<br>0.375.100 | IGF1       |               |  |
| pyrimidine nucleoside metabolic process (GO:0006213)                                      | 0.00598524283<br>64459065 | 0.0292260289<br>22216006 | 0 | 0 | 20.385.714.28<br>5.714.200 | 1.043.434.298.<br>452.160  | UPP2       |               |  |
| positive regulation of glycogen metabolic process (GO:0070875)                            | 0.00598524283<br>64459065 | 0.0292260289<br>22216006 | 0 | 0 | 20.385.714.28<br>5.714.200 | 1.043.434.298.<br>452.160  | IGF1       |               |  |
| myoblast differentiation (GO:0045445)                                                     | 0.00598524283<br>64459065 | 0.0292260289<br>22216006 | 0 | 0 | 20.385.714.28<br>5.714.200 | 1.043.434.298.<br>452.160  | IGF1       |               |  |
| cellular response to sterol (GO:0036315)                                                  | 0.00638314407<br>0851652  | 0.0292260289<br>22216006 | 0 | 0 | 19.025.714.28<br>5.714.200 | 9.615.775.796.<br>687.340  | CYP7<br>A1 |               |  |
| aromatic amino acid family catabolic process (GO:0009074)                                 | 0.00638314407<br>0851652  | 0.0292260289<br>22216006 | 0 | 0 | 19.025.714.28<br>5.714.200 | 9.615.775.796.<br>687.340  | TAT        |               |  |
| negative regulation of release of cytochrome c from mitochondria (GO:0090201)             | 0.00638314407<br>0851652  | 0.0292260289<br>22216006 | 0 | 0 | 19.025.714.28<br>5.714.200 | 9.615.775.796.<br>687.340  | IGF1       |               |  |
| positive regulation of cardiac muscle tissue growth (GO:0055023)                          | 0.00678090602<br>009761   | 0.0292260289<br>22216006 | 0 | 0 | 17.835.714.28<br>5.714.200 | 8.906.521.752.<br>159.380  | IGF1       |               |  |
| regulation of steroid biosynthetic process (GO:0050810)                                   | 0.00678090602<br>009761   | 0.0292260289<br>22216006 | 0 | 0 | 17.835.714.28<br>5.714.200 | 8.906.521.752.<br>159.380  | CYP7<br>A1 |               |  |
| pyrimidine-containing compound catabolic process (GO:0072529)                             | 0.00678090602<br>009761   | 0.0292260289<br>22216006 | 0 | 0 | 17.835.714.28<br>5.714.200 | 8.906.521.752.<br>159.380  | UPP2       |               |  |
| positive regulation of smooth muscle cell migration (GO:0014911)                          | 0.00678090602<br>009761   | 0.0292260289<br>22216006 | 0 | 0 | 17.835.714.28<br>5.714.200 | 8.906.521.752.<br>159.380  | IGF1       |               |  |
| positive regulation of muscle hypertrophy (GO:0014742)                                    | 0.00678090602<br>009761   | 0.0292260289<br>22216006 | 0 | 0 | 17.835.714.28<br>5.714.200 | 8.906.521.752.<br>159.380  | IGF1       |               |  |
| negative regulation of amyloid-beta formation (GO:1902430)                                | 0.00678090602<br>009761   | 0.0292260289<br>22216006 | 0 | 0 | 17.835.714.28<br>5.714.200 | 8.906.521.752.<br>159.380  | IGF1       |               |  |
| positive regulation of cardiac muscle hypertrophy (GO:0010613)                            | 0.00717852872<br>0410204  | 0.0292260289<br>22216006 | 0 | 0 | 16.785.714.28<br>5.714.200 | 8.286.537.822.<br>644.390  | IGF1       |               |  |
| regulation of multicellular organism growth (GO:0040014)                                  | 0.00717852872<br>0410204  | 0.0292260289<br>22216006 | 0 | 0 | 16.785.714.28<br>5.714.200 | 8.286.537.822.<br>644.390  | IGF1       |               |  |

## 5. Supplementary Table S5 (Proteomic analysis; Overview of all significantly altered pathways in the offspring by maternal diet)

|                                                                                          |                           |                          |   |   |                            |                            |            |  |  |
|------------------------------------------------------------------------------------------|---------------------------|--------------------------|---|---|----------------------------|----------------------------|------------|--|--|
| regulation of insulin-like growth factor receptor signaling pathway (GO:0043567)         | 0.00757601220<br>63041925 | 0.0292260289<br>22216006 | 0 | 0 | 15,852.380.95<br>2.380.900 | 7.740.350.338.<br>275.500  | IGF1       |  |  |
| response to cholesterol (GO:0070723)                                                     | 0.00757601220<br>63041925 | 0.0292260289<br>22216006 | 0 | 0 | 15,852.380.95<br>2.380.900 | 7.740.350.338.<br>275.500  | CYP7<br>A1 |  |  |
| regulation of neuroinflammatory response (GO:0150077)                                    | 0.00757601220<br>63041925 | 0.0292260289<br>22216006 | 0 | 0 | 15,852.380.95<br>2.380.900 | 7.740.350.338.<br>275.500  | IGF1       |  |  |
| negative regulation of amyloid precursor protein catabolic process (GO:1902992)          | 0.00757601220<br>63041925 | 0.0292260289<br>22216006 | 0 | 0 | 15,852.380.95<br>2.380.900 | 7.740.350.338.<br>275.500  | IGF1       |  |  |
| positive regulation of activated T cell proliferation (GO:0042104)                       | 0.00797335651<br>42536    | 0.0292260289<br>22216006 | 0 | 0 | 15,017.293.23<br>3.082.700 | 7.255.830.081.<br>396.660  | IGF1       |  |  |
| regulation of smooth muscle cell migration (GO:0014910)                                  | 0.00797335651<br>42536    | 0.0292260289<br>22216006 | 0 | 0 | 15,017.293.23<br>3.082.700 | 7.255.830.081.<br>396.660  | IGF1       |  |  |
| positive regulation of purine nucleotide metabolic process (GO:1900544)                  | 0.00837056168<br>1605555  | 0.0292260289<br>22216006 | 0 | 0 | 14,265.714.28<br>5.714.200 | 6.823.340.060.<br>288.630  | IGF1       |  |  |
| positive regulation of transcription regulatory region DNA binding (GO:2000679)          | 0.00837056168<br>1605555  | 0.0292260289<br>22216006 | 0 | 0 | 14,265.714.28<br>5.714.200 | 6.823.340.060.<br>288.630  | IGF1       |  |  |
| positive regulation of glycolytic process (GO:0045821)                                   | 0.00837056168<br>1605555  | 0.0292260289<br>22216006 | 0 | 0 | 14,265.714.28<br>5.714.200 | 6.823.340.060.<br>288.630  | IGF1       |  |  |
| positive regulation of vascular associated smooth muscle cell proliferation (GO:1904707) | 0.00837056168<br>1605555  | 0.0292260289<br>22216006 | 0 | 0 | 14,265.714.28<br>5.714.200 | 6.823.340.060.<br>288.630  | IGF1       |  |  |
| myotube differentiation (GO:0014902)                                                     | 0.00837056168<br>1605555  | 0.0292260289<br>22216006 | 0 | 0 | 14,265.714.28<br>5.714.200 | 6.823.340.060.<br>288.630  | IGF1       |  |  |
| negative regulation of reproductive process (GO:2000242)                                 | 0.00837056168<br>1605555  | 0.0292260289<br>22216006 | 0 | 0 | 14,265.714.28<br>5.714.200 | 6.823.340.060.<br>288.630  | IGF1       |  |  |
| glutamate metabolic process (GO:0006536)                                                 | 0.00876762774<br>5742801  | 0.0296324087<br>27675856 | 0 | 0 | 13,585.714.28<br>5.714.200 | 6.435.130.349.<br>149.830  | TAT        |  |  |
| ERK1 and ERK2 cascade (GO:0070371)                                                       | 0.00916455474<br>5730224  | 0.0296324087<br>27675856 | 0 | 0 | 12,967.532.46<br>7.532.400 | 6.084.900.471.<br>331.720  | IGF1       |  |  |
| positive regulation of carbohydrate metabolic process (GO:0045913)                       | 0.00956134271<br>7827156  | 0.0296324087<br>27675856 | 0 | 0 | 12,403.105.59<br>0.062.100 | 5.767.477.724.<br>354.010  | IGF1       |  |  |
| regulation of cardiac muscle hypertrophy (GO:0010611)                                    | 0.00956134271<br>7827156  | 0.0296324087<br>27675856 | 0 | 0 | 12,403.105.59<br>0.062.100 | 5.767.477.724.<br>354.010  | IGF1       |  |  |
| protein kinase B signaling (GO:0043491)                                                  | 0.00956134271<br>7827156  | 0.0296324087<br>27675856 | 0 | 0 | 12,403.105.59<br>0.062.100 | 5.767.477.724.<br>354.010  | IGF1       |  |  |
| cellular response to hexose stimulus (GO:0071331)                                        | 0.00995799170<br>1556103  | 0.0296324087<br>27675856 | 0 | 0 | 11,885.714.28<br>5.714.200 | 5.478.577.209.<br>909.950  | CYP7<br>A1 |  |  |
| regulation of glycogen biosynthetic process (GO:0005979)                                 | 0.01035450173<br>6256563  | 0.0296324087<br>27675856 | 0 | 0 | 11,409.714.28<br>5.714.200 | 5.214.620.402.<br>892.070  | IGF1       |  |  |
| proteoglycan metabolic process (GO:0006029)                                              | 0.01035450173<br>6256563  | 0.0296324087<br>27675856 | 0 | 0 | 11,409.714.28<br>5.714.200 | 5.214.620.402.<br>892.070  | IGF1       |  |  |
| negative regulation of cell development (GO:0010721)                                     | 0.01035450173<br>6256563  | 0.0296324087<br>27675856 | 0 | 0 | 11,409.714.28<br>5.714.200 | 5.214.620.402.<br>892.070  | IGF1       |  |  |
| negative regulation of interleukin-1 beta production (GO:0032691)                        | 0.01035450173<br>6256563  | 0.0296324087<br>27675856 | 0 | 0 | 11,409.714.28<br>5.714.200 | 5.214.620.402.<br>892.070  | IGF1       |  |  |
| positive regulation of glucose import (GO:0046326)                                       | 0.01035450173<br>6256563  | 0.0296324087<br>27675856 | 0 | 0 | 11,409.714.28<br>5.714.200 | 5.214.620.402.<br>892.070  | IGF1       |  |  |
| positive regulation of nuclear division (GO:0051785)                                     | 0.01075087286<br>0949598  | 0.0296324087<br>27675856 | 0 | 0 | 1,097.032.967.<br>032.960  | 49,725.962.91<br>4.000.300 | IGF1       |  |  |
| regulation of transcription regulatory region DNA binding (GO:2000677)                   | 0.01075087286<br>0949598  | 0.0296324087<br>27675856 | 0 | 0 | 1,097.032.967.<br>032.960  | 49,725.962.91<br>4.000.300 | IGF1       |  |  |
| positive regulation of striated muscle cell differentiation (GO:0051155)                 | 0.01075087286<br>0949598  | 0.0296324087<br>27675856 | 0 | 0 | 1,097.032.967.<br>032.960  | 49,725.962.91<br>4.000.300 | IGF1       |  |  |
| bile acid biosynthetic process (GO:0006699)                                              | 0.01075087286<br>0949598  | 0.0296324087<br>27675856 | 0 | 0 | 1,097.032.967.<br>032.960  | 49,725.962.91<br>4.000.300 | CYP7<br>A1 |  |  |
| regulation of calcineurin-NFAT signaling cascade (GO:0070884)                            | 0.01114710511<br>3416074  | 0.0296324087<br>27675856 | 0 | 0 | 10,563.492.06<br>3.492.000 | 4,749.953.903.<br>533.840  | IGF1       |  |  |
| positive regulation of fibroblast proliferation (GO:0048146)                             | 0.01114710511<br>3416074  | 0.0296324087<br>27675856 | 0 | 0 | 10,563.492.06<br>3.492.000 | 4,749.953.903.<br>533.840  | IGF1       |  |  |
| alpha-amino acid catabolic process (GO:1901606)                                          | 0.01193915316<br>674268   | 0.0296324087<br>27675856 | 0 | 0 | 9,833.990.147.<br>783.250  | 435.442.406.2<br>27.662    | TAT        |  |  |
| positive regulation of small GTPase mediated signal transduction (GO:0051057)            | 0.01193915316<br>674268   | 0.0296324087<br>27675856 | 0 | 0 | 9,833.990.147.<br>783.250  | 435.442.406.2<br>27.662    | IGF1       |  |  |
| negative regulation of interleukin-1 production (GO:0032692)                             | 0.01193915316<br>674268   | 0.0296324087<br>27675856 | 0 | 0 | 9,833.990.147.<br>783.250  | 435.442.406.2<br>27.662    | IGF1       |  |  |
| activation of protein kinase B activity (GO:0032148)                                     | 0.01233496904<br>2911155  | 0.0296324087<br>27675856 | 0 | 0 | 9,505.714.285.<br>714.280  | 4,178.062.796.<br>500.490  | IGF1       |  |  |
| proteoglycan biosynthetic process (GO:0030166)                                           | 0.01233496904<br>2911155  | 0.0296324087<br>27675856 | 0 | 0 | 9,505.714.285.<br>714.280  | 4,178.062.796.<br>500.490  | IGF1       |  |  |
| regulation of developmental growth (GO:0048638)                                          | 0.01233496904<br>2911155  | 0.0296324087<br>27675856 | 0 | 0 | 9,505.714.285.<br>714.280  | 4,178.062.796.<br>500.490  | IGF1       |  |  |
| cellular response to glucose stimulus (GO:0071333)                                       | 0.01273064620<br>9021314  | 0.0296324087<br>27675856 | 0 | 0 | 9,198.617.511.<br>520.730  | 4,014.040.374.<br>155.010  | CYP7<br>A1 |  |  |
| positive regulation of glucose transmembrane transport (GO:0010828)                      | 0.01273064620<br>9021314  | 0.0296324087<br>27675856 | 0 | 0 | 9,198.617.511.<br>520.730  | 4,014.040.374.<br>155.010  | IGF1       |  |  |
| regulation of cellular biosynthetic process (GO:0031326)                                 | 0.01273064620<br>9021314  | 0.0296324087<br>27675856 | 0 | 0 | 9,198.617.511.<br>520.730  | 4,014.040.374.<br>155.010  | CYP7<br>A1 |  |  |
| positive regulation of ATP metabolic process (GO:1903580)                                | 0.01312618470<br>2817524  | 0.0296324087<br>27675856 | 0 | 0 | 8,910.714.285.<br>714.280  | 3,861.142.784.<br>895.610  | IGF1       |  |  |
| bile acid metabolic process (GO:0008206)                                                 | 0.01312618470<br>2817524  | 0.0296324087<br>27675856 | 0 | 0 | 8,910.714.285.<br>714.280  | 3,861.142.784.<br>895.610  | CYP7<br>A1 |  |  |
| primary alcohol metabolic process (GO:0034308)                                           | 0.01312618470<br>2817524  | 0.0296324087<br>27675856 | 0 | 0 | 8,910.714.285.<br>714.280  | 3,861.142.784.<br>895.610  | IGF1       |  |  |
| muscle cell development (GO:0055001)                                                     | 0.01312618470<br>2817524  | 0.0296324087<br>27675856 | 0 | 0 | 8,910.714.285.<br>714.280  | 3,861.142.784.<br>895.610  | IGF1       |  |  |
| regulation of activated T cell proliferation (GO:0046006)                                | 0.01352158456<br>5055974  | 0.0296324087<br>27675856 | 0 | 0 | 8,640.259.740.<br>259.740  | 3,718.308.142.<br>207.310  | IGF1       |  |  |
| regulation of amyloid-beta formation (GO:1902003)                                        | 0.01352158456<br>5055974  | 0.0296324087<br>27675856 | 0 | 0 | 8,640.259.740.<br>259.740  | 3,718.308.142.<br>207.310  | IGF1       |  |  |
| positive regulation of DNA binding (GO:0043388)                                          | 0.01352158456<br>5055974  | 0.0296324087<br>27675856 | 0 | 0 | 8,640.259.740.<br>259.740  | 3,718.308.142.<br>207.310  | IGF1       |  |  |

## 5. Supplementary Table S5 (Proteomic analysis; Overview of all significantly altered pathways in the offspring by maternal diet)

|                                                                                           |                          |                          |   |   |                            |                            |            |  |  |
|-------------------------------------------------------------------------------------------|--------------------------|--------------------------|---|---|----------------------------|----------------------------|------------|--|--|
| negative regulation of mitochondrion organization (GO:0010823)                            | 0.01352158456<br>5055974 | 0.0296324087<br>27675856 | 0 | 0 | 8.640.259.740.<br>259.740  | 3.718.308.142.<br>207.310  | IGF1       |  |  |
| phosphatidylinositol 3-kinase signaling (GO:0014065)                                      | 0.01352158456<br>5055974 | 0.0296324087<br>27675856 | 0 | 0 | 8.640.259.740.<br>259.740  | 3.718.308.142.<br>207.310  | IGF1       |  |  |
| cellular response to amyloid-beta (GO:1904646)                                            | 0.01391684583<br>5577172 | 0.0301775814<br>96093658 | 0 | 0 | 8.385.714.285.<br>714.280  | 3.584.603.752.<br>954.010  | IGF1       |  |  |
| positive regulation of mitotic nuclear division (GO:0045840)                              | 0.01431196855<br>4805366 | 0.0302963226<br>906595   | 0 | 0 | 8.145.714.285.<br>714.280  | 34.592.071.94<br>0.977.700 | IGF1       |  |  |
| neutrophil degranulation (GO:0043312)                                                     | 0.01468141774<br>8872256 | 0.0302963226<br>906595   | 0 | 0 | 13.578.983.99<br>4.432.800 | 57.319.236.30<br>7.803.200 |            |  |  |
| regulation of glucose import (GO:0046324)                                                 | 0.01470695276<br>2456068 | 0.0302963226<br>906595   | 0 | 0 | 7.919.047.619.<br>047.610  | 3.341.390.605.<br>677.810  | IGF1       |  |  |
| regulation of vascular associated smooth muscle cell proliferation (GO:1904705)           | 0.01470695276<br>2456068 | 0.0302963226<br>906595   | 0 | 0 | 7.919.047.619.<br>047.610  | 3.341.390.605.<br>677.810  | IGF1       |  |  |
| glutamine family amino acid metabolic process (GO:0009064)                                | 0.01470695276<br>2456068 | 0.0302963226<br>906595   | 0 | 0 | 7.919.047.619.<br>047.610  | 3.341.390.605.<br>677.810  | TAT        |  |  |
| neutrophil activation involved in immune response (GO:002283)                             | 0.01491486483<br>3288563 | 0.0304204173<br>8274697  | 0 | 0 | 1.346.376.811.<br>594.200  | 5.662.048.901.<br>383.080  |            |  |  |
| neutrophil mediated immunity (GO:0002446)                                                 | 0.01509103056<br>6676898 | 0.0304779636<br>93484714 | 0 | 0 | 13.378.600.82<br>3.045.200 | 56.105.232.40<br>6.378.800 |            |  |  |
| regulation of release of cytochrome c from mitochondria (GO:0090199)                      | 0.01628550529<br>596983  | 0.0325710105<br>9193966  | 0 | 0 | 7.125.714.285.<br>714.280  | 293.399.847.2<br>05.648    | IGF1       |  |  |
| cellular glucose homeostasis (GO:0001678)                                                 | 0.01707395155<br>0447674 | 0.0338195578<br>78771354 | 0 | 0 | 6.785.714.285.<br>714.280  | 2.761.922.295.<br>799.090  | CYP7<br>A1 |  |  |
| positive regulation of osteoblast differentiation (GO:0045669)                            | 0.01746796731<br>842876  | 0.0339471817<br>69776645 | 0 | 0 | 6.627.574.750.<br>830.560  | 2.682.435.666.<br>902.730  | IGF1       |  |  |
| response to amyloid-beta (GO:1904645)                                                     | 0.01746796731<br>842876  | 0.0339471817<br>69776645 | 0 | 0 | 6.627.574.750.<br>830.560  | 2.682.435.666.<br>902.730  | IGF1       |  |  |
| regulation of fibroblast proliferation (GO:0048145)                                       | 0.01825558433<br>5152574 | 0.0345013795<br>6918743  | 0 | 0 | 6.332.380.952.<br>380.950  | 25.350.320.96<br>2.011.800 | IGF1       |  |  |
| negative regulation of tumor necrosis factor production (GO:0032720)                      | 0.01825558433<br>5152574 | 0.0345013795<br>6918743  | 0 | 0 | 6.332.380.952.<br>380.950  | 25.350.320.96<br>2.011.800 | IGF1       |  |  |
| positive regulation of smooth muscle cell proliferation (GO:0048661)                      | 0.01825558433<br>5152574 | 0.0345013795<br>6918743  | 0 | 0 | 6.332.380.952.<br>380.950  | 25.350.320.96<br>2.011.800 | IGF1       |  |  |
| regulation of DNA binding (GO:0051101)                                                    | 0.01864918566<br>892     | 0.0349248386<br>16341096 | 0 | 0 | 6.194.409.937.<br>888.190  | 2.466.584.798.<br>233.950  | IGF1       |  |  |
| negative regulation of tumor necrosis factor superfamily cytokine production (GO:1903556) | 0.01904264893<br>7520508 | 0.0350248721<br>5293951  | 0 | 0 | 6.062.310.030.<br>395.130  | 24.013.259.45<br>6.270.100 | IGF1       |  |  |
| cellular response to alcohol (GO:0097306)                                                 | 0.01904264893<br>7520508 | 0.0350248721<br>5293951  | 0 | 0 | 6.062.310.030.<br>395.130  | 24.013.259.45<br>6.270.100 | CYP7<br>A1 |  |  |
| regulation of smooth muscle cell proliferation (GO:0048660)                               | 0.01943597418<br>461227  | 0.0351211463<br>33597614 | 0 | 0 | 59.357.142.85<br>7.142.800 | 2.339.045.135.<br>601.690  | IGF1       |  |  |
| response to glucose (GO:0009749)                                                          | 0.01943597418<br>461227  | 0.0351211463<br>33597614 | 0 | 0 | 59.357.142.85<br>7.142.800 | 2.339.045.135.<br>601.690  | CYP7<br>A1 |  |  |
| organic hydroxy compound biosynthetic process (GO:1901617)                                | 0.01982916145<br>118511  | 0.0355200631<br>2125333  | 0 | 0 | 58.142.857.14<br>2.857.100 | 2.279.549.801.<br>512.960  | CYP7<br>A1 |  |  |
| inositol lipid-mediated signaling (GO:0048017)                                            | 0.02022221077<br>4875234 | 0.0359118570<br>65726714 | 0 | 0 | 5.697.714.285.<br>714.280  | 22.226.633.77<br>9.925.100 | IGF1       |  |  |
| cellular response to peptide (GO:1901653)                                                 | 0.02257761225<br>7970867 | 0.0390839338<br>2472268  | 0 | 0 | 50.857.142.85<br>7.142.800 | 19.278.907.77<br>0.536.500 | IGF1       |  |  |
| regulation of mitotic nuclear division (GO:0007088)                                       | 0.02257761225<br>7970867 | 0.0390839338<br>2472268  | 0 | 0 | 50.857.142.85<br>7.142.800 | 19.278.907.77<br>0.536.500 | IGF1       |  |  |
| dicarboxylic acid metabolic process (GO:0043648)                                          | 0.02257761225<br>7970867 | 0.0390839338<br>2472268  | 0 | 0 | 50.857.142.85<br>7.142.800 | 19.278.907.77<br>0.536.500 | TAT        |  |  |
| muscle organ development (GO:0007517)                                                     | 0.02296969714<br>52446   | 0.0394313134<br>3266989  | 0 | 0 | 49.962.406.01<br>5.037.500 | 18.853.710.84<br>6.919.200 | IGF1       |  |  |
| positive regulation of tyrosine phosphorylation of STAT protein (GO:0042531)              | 0.02336164442<br>2266112 | 0.0397727169<br>5030429  | 0 | 0 | 4.909.852.216.<br>748.760  | 18.444.644.09<br>6.582.100 | IGF1       |  |  |
| positive regulation of cellular process (GO:0048522)                                      | 0.02409105510<br>8044237 | 0.0406783389<br>52927155 | 0 | 0 | 10.363.295.88<br>0.149.800 | 3.861.275.609.<br>472.420  |            |  |  |
| positive regulation of Ras protein signal transduction (GO:0046579)                       | 0.02492805820<br>599394  | 0.0413607206<br>0304657  | 0 | 0 | 4.592.165.898.<br>617.510  | 1.695.318.022.<br>982.440  | IGF1       |  |  |
| monocarboxylic acid biosynthetic process (GO:0072330)                                     | 0.02492805820<br>599394  | 0.0413607206<br>0304657  | 0 | 0 | 4.592.165.898.<br>617.510  | 1.695.318.022.<br>982.440  | CYP7<br>A1 |  |  |
| regulation of extrinsic apoptotic signaling pathway (GO:2001236)                          | 0.02531931803<br>3677134 | 0.0413607206<br>0304657  | 0 | 0 | 4.519.047.619.<br>047.610  | 16.612.866.89<br>3.112.000 | IGF1       |  |  |
| regulation of cellular ketone metabolic process (GO:0010565)                              | 0.02531931803<br>3677134 | 0.0413607206<br>0304657  | 0 | 0 | 4.519.047.619.<br>047.610  | 16.612.866.89<br>3.112.000 | CYP7<br>A1 |  |  |
| steroid biosynthetic process (GO:0006694)                                                 | 0.02571044049<br>0540786 | 0.0413607206<br>0304657  | 0 | 0 | 44.482.142.85<br>7.142.800 | 16.284.281.40<br>8.743.700 | CYP7<br>A1 |  |  |
| extracellular matrix disassembly (GO:0022617)                                             | 0.02610142562<br>3281816 | 0.0413607206<br>0304657  | 0 | 0 | 4.379.560.439.<br>560.430  | 15.966.849.67<br>4.970.800 | PRS<br>S2  |  |  |
| positive regulation of T cell proliferation (GO:0042102)                                  | 0.02610142562<br>3281816 | 0.0413607206<br>0304657  | 0 | 0 | 4.379.560.439.<br>560.430  | 15.966.849.67<br>4.970.800 | IGF1       |  |  |
| cellular component disassembly (GO:0022411)                                               | 0.02610142562<br>3281816 | 0.0413607206<br>0304657  | 0 | 0 | 4.379.560.439.<br>560.430  | 15.966.849.67<br>4.970.800 | PRS<br>S2  |  |  |
| regulation of tyrosine phosphorylation of STAT protein (GO:0042509)                       | 0.02688298407<br>6400464 | 0.0418539836<br>0412257  | 0 | 0 | 4.248.400.852.<br>878.460  | 15.363.329.52<br>3.076.900 | IGF1       |  |  |
| positive regulation of protein transport (GO:0051222)                                     | 0.02727355747<br>3830964 | 0.0418539836<br>0412257  | 0 | 0 | 41.857.142.85<br>7.142.800 | 1.507.626.325.<br>151.400  | IGF1       |  |  |
| sterol metabolic process (GO:0016125)                                                     | 0.02766399371<br>512237  | 0.0418539836<br>0412257  | 0 | 0 | 4.124.844.720.<br>496.890  | 1.479.839.017.<br>165.650  | CYP7<br>A1 |  |  |
| wound healing (GO:0042060)                                                                | 0.02766399371<br>512237  | 0.0418539836<br>0412257  | 0 | 0 | 4.124.844.720.<br>496.890  | 1.479.839.017.<br>165.650  | IGF1       |  |  |
| regulation of glycolytic process (GO:0006110)                                             | 0.02805429283<br>8003377 | 0.0418539836<br>0412257  | 0 | 0 | 4.065.714.285.<br>714.280  | 14.529.291.93<br>1.699.200 | IGF1       |  |  |
| cholesterol homeostasis (GO:0042632)                                                      | 0.02805429283<br>8003377 | 0.0418539836<br>0412257  | 0 | 0 | 4.065.714.285.<br>714.280  | 14.529.291.93<br>1.699.200 | CYP7<br>A1 |  |  |
| phosphatidylinositol-mediated signaling (GO:0048015)                                      | 0.02805429283<br>8003377 | 0.0418539836<br>0412257  | 0 | 0 | 4.065.714.285.<br>714.280  | 14.529.291.93<br>1.699.200 | IGF1       |  |  |

## 5. Supplementary Table S5 (Proteomic analysis; Overview of all significantly altered pathways in the offspring by maternal diet)

|                                                                             |                          |                          |   |   |                            |                            |            |  |  |
|-----------------------------------------------------------------------------|--------------------------|--------------------------|---|---|----------------------------|----------------------------|------------|--|--|
| sterol homeostasis (GO:0055092)                                             | 0.02844445487<br>658815  | 0.0418539836<br>0412257  | 0 | 0 | 4.008.249.496.<br>981.890  | 14.268.574.75<br>6.562.200 | CYP7<br>A1 |  |  |
| positive regulation of protein secretion (GO:0050714)                       | 0.02844445487<br>658815  | 0.0418539836<br>0412257  | 0 | 0 | 4.008.249.496.<br>981.890  | 14.268.574.75<br>6.562.200 | IGF1       |  |  |
| positive regulation of secretion by cell (GO:1903532)                       | 0.02844445487<br>658815  | 0.0418539836<br>0412257  | 0 | 0 | 4.008.249.496.<br>981.890  | 14.268.574.75<br>6.562.200 | IGF1       |  |  |
| positive regulation of growth (GO:0045927)                                  | 0.03000373305<br>9445183 | 0.0437832260<br>45979264 | 0 | 0 | 3.793.714.285.<br>714.280  | 1.330.240.674.<br>608.420  | PRS<br>S2  |  |  |
| positive regulation of phosphatidylinositol 3-kinase signaling (GO:0014068) | 0.03039321031<br>347104  | 0.0437832260<br>45979264 | 0 | 0 | 3.743.609.022.<br>556.390  | 13.078.433.04<br>1.717.300 | IGF1       |  |  |
| cholesterol metabolic process (GO:0008203)                                  | 0.03039321031<br>347104  | 0.0437832260<br>45979264 | 0 | 0 | 3.743.609.022.<br>556.390  | 13.078.433.04<br>1.717.300 | CYP7<br>A1 |  |  |
| negative regulation of apoptotic signaling pathway (GO:2001234)             | 0.03078255073<br>9377516 | 0.0440361489<br>7438728  | 0 | 0 | 3.694.805.194.<br>805.190  | 1.286.090.483.<br>496.380  | IGF1       |  |  |
| positive regulation of cell adhesion (GO:0045785)                           | 0.03156082125<br>16243   | 0.0445310217<br>65990456 | 0 | 0 | 3.600.904.159.<br>132.000  | 12.444.144.16<br>9.317.200 | PRS<br>S2  |  |  |
| negative regulation of extrinsic apoptotic signaling pathway (GO:2001237)   | 0.03156082125<br>16243   | 0.0445310217<br>65990456 | 0 | 0 | 3.600.904.159.<br>132.000  | 12.444.144.16<br>9.317.200 | IGF1       |  |  |
| regulation of interleukin-1 beta production (GO:0032651)                    | 0.03272720178<br>9121446 | 0.0452470038<br>1583233  | 0 | 0 | 3.468.641.114.<br>982.570  | 118.611.871.7<br>34.907    | IGF1       |  |  |
| glycoprotein biosynthetic process (GO:0009101)                              | 0.03272720178<br>9121446 | 0.0452470038<br>1583233  | 0 | 0 | 3.468.641.114.<br>982.570  | 118.611.871.7<br>34.907    | IGF1       |  |  |
| regulation of osteoblast differentiation (GO:0045667)                       | 0.03272720178<br>9121446 | 0.0452470038<br>1583233  | 0 | 0 | 3.468.641.114.<br>982.570  | 118.611.871.7<br>34.907    | IGF1       |  |  |
| regulation of Ras protein signal transduction (GO:0046578)                  | 0.03389235304<br>552857  | 0.0462372498<br>5019129  | 0 | 0 | 33.457.142.85<br>7.142.800 | 11.323.790.36<br>1.856.500 | IGF1       |  |  |
| negative regulation of cellular amide metabolic process (GO:0034249)        | 0.03389235304<br>552857  | 0.0462372498<br>5019129  | 0 | 0 | 33.457.142.85<br>7.142.800 | 11.323.790.36<br>1.856.500 | IGF1       |  |  |
| positive regulation of binding (GO:0051099)                                 | 0.03544397773<br>863309  | 0.0480359171<br>9841063  | 0 | 0 | 31.947.030.49<br>7.592.200 | 1.066.967.538.<br>219.120  | IGF1       |  |  |
| regulation of peptidyl-tyrosine phosphorylation (GO:0050730)                | 0.03621897211<br>8804385 | 0.0467654134<br>410046   | 0 | 0 | 3.124.175.824.<br>175.820  | 10.366.553.38<br>5.683.800 | IGF1       |  |  |
| regulation of epithelial cell proliferation (GO:0050678)                    | 0.03660626495<br>698383  | 0.0489668219<br>55445904 | 0 | 0 | 30.900.621.11<br>8.012.400 | 1.022.049.130.<br>477.510  | IGF1       |  |  |
| positive regulation of cell cycle process (GO:0090068)                      | 0.03969970871<br>0484755 | 0.0527621935<br>11999095 | 0 | 0 | 28.417.142.85<br>7.142.800 | 9.168.539.448.<br>196.990  | IGF1       |  |  |
| steroid metabolic process (GO:0008202)                                      | 0.04085750745<br>521912  | 0.0539528624<br>0881499  | 0 | 0 | 2.758.529.819.<br>694.860  | 8.820.853.410.<br>483.190  | CYP7<br>A1 |  |  |
| small GTPase mediated signal transduction (GO:007264)                       | 0.04162869457<br>8224525 | 0.0542753866<br>0198894  | 0 | 0 | 27.057.142.85<br>7.142.800 | 8.601.372.572.<br>734.710  | IGF1       |  |  |
| regulation of phosphatidylinositol 3-kinase signaling (GO:0014066)          | 0.04162869457<br>8224525 | 0.0542753866<br>0198894  | 0 | 0 | 27.057.142.85<br>7.142.800 | 8.601.372.572.<br>734.710  | IGF1       |  |  |
| activation of protein kinase activity (GO:0032147)                          | 0.04470802045<br>537426  | 0.0579235988<br>2897545  | 0 | 0 | 25.131.479.14<br>0.328.600 | 7.809.864.401.<br>057.700  | IGF1       |  |  |
| positive regulation of epithelial cell proliferation (GO:0050679)           | 0.04816191110<br>6035224 | 0.0618353319<br>3575454  | 0 | 0 | 2.326.697.892.<br>271.660  | 705.730.932.5<br>89.798    | IGF1       |  |  |
| regulation of tumor necrosis factor production (GO:0032680)                 | 0.04854500142<br>0476706 | 0.0618353319<br>3575454  | 0 | 0 | 23.076.655.05<br>2.264.800 | 6.981.297.485.<br>230.680  | IGF1       |  |  |
| platelet degranulation (GO:0002576)                                         | 0.04892795682<br>29514   | 0.0618353319<br>3575454  | 0 | 0 | 22.889.400.92<br>1.658.900 | 690.666.232.6<br>97.606    | IGF1       |  |  |
| regulation of protein secretion (GO:0050708)                                | 0.04892795682<br>29514   | 0.0618353319<br>3575454  | 0 | 0 | 22.889.400.92<br>1.658.900 | 690.666.232.6<br>97.606    | IGF1       |  |  |
| positive regulation of macromolecule biosynthetic process (GO:0010557)      | 0.05045843011<br>5721514 | 0.0633807109<br>9901604  | 0 | 0 | 22.169.642.85<br>7.142.800 | 6.621.197.613.<br>100.180  | IGF1       |  |  |
| regulation of cell adhesion (GO:0030155)                                    | 0.05198674804<br>787824  | 0.0649046672<br>597526   | 0 | 0 | 21.493.506.49<br>3.506.400 | 6.355.127.863.<br>735.060  | PRS<br>S2  |  |  |
| positive regulation of peptidyl-tyrosine phosphorylation (GO:0050731)       | 0.05236849106<br>1118044 | 0.0649874045<br>6982119  | 0 | 0 | 21.330.827.06<br>7.669.100 | 6.291.421.182.<br>271.060  | IGF1       |  |  |
| positive regulation of cellular catabolic process (GO:0031331)              | 0.05503692821<br>9595174 | 0.0678898635<br>5231501  | 0 | 0 | 20.257.142.85<br>7.142.800 | 5.874.066.816.<br>819.040  | IGF1       |  |  |
| Ras protein signal transduction (GO:0007265)                                | 0.05541759631<br>2302815 | 0.0679525288<br>1151417  | 0 | 0 | 20.112.462.00<br>6.079.000 | 5.818.249.888.<br>054.840  | IGF1       |  |  |
| monocarboxylic acid metabolic process (GO:0032787)                          | 0.05579813022<br>483266  | 0.0680142889<br>1310964  | 0 | 0 | 19.969.818.91<br>3.480.800 | 5.763.319.530.<br>748.080  | IGF1       |  |  |
| skeletal system development (GO:0001501)                                    | 0.06149006445<br>754368  | 0.0745114898<br>7208234  | 0 | 0 | 18.048.225.65<br>9.690.600 | 50.334.329.63<br>5.540.900 | IGF1       |  |  |
| regulation of MAPK cascade (GO:0043408)                                     | 0.06451346874<br>924052  | 0.0777179798<br>9674589  | 0 | 0 | 17.166.233.76<br>6.233.700 | 47.050.608.42<br>0.266.300 | IGF1       |  |  |
| protein stabilization (GO:0050821)                                          | 0.06940832625<br>547197  | 0.0826177488<br>5366903  | 0 | 0 | 15.902.086.67<br>7.367.500 | 42.422.766.98<br>6.769.000 | IGF1       |  |  |
| positive regulation of cellular biosynthetic process (GO:0031328)           | 0.06978392378<br>902142  | 0.0826177488<br>5366903  | 0 | 0 | 1.581.245.011.<br>971.260  | 420.983.020.9<br>67.207    | IGF1       |  |  |
| regulated exocytosis (GO:0045055)                                           | 0.06978392378<br>902142  | 0.0826177488<br>5366903  | 0 | 0 | 1.581.245.011.<br>971.260  | 420.983.020.9<br>67.207    | IGF1       |  |  |
| negative regulation of macromolecule metabolic process (GO:0010605)         | 0.07502837931<br>017566  | 0.0883191207<br>879782   | 0 | 0 | 14.655.070.31<br>8.282.700 | 37.955.003.15<br>7.820.300 | IGF1       |  |  |
| regulation of macromolecule metabolic process (GO:0060255)                  | 0.07726807133<br>802915  | 0.0904387653<br>161023   | 0 | 0 | 14.208.901.65<br>1.112.700 | 3.638.152.974.<br>515.550  | IGF1       |  |  |
| negative regulation of inflammatory response (GO:0050728)                   | 0.08173322422<br>814254  | 0.0951245434<br>519625   | 0 | 0 | 1.339.268.788.<br>083.950  | 33.539.237.25<br>8.401.200 | IGF1       |  |  |
| regulation of cell growth (GO:0001558)                                      | 0.08358811737<br>340943  | 0.0967368099<br>9394574  | 0 | 0 | 13.079.365.07<br>9.365.000 | 3.246.107.330.<br>597.870  | PRS<br>S2  |  |  |
| positive regulation of cell motility (GO:2000147)                           | 0.08506967055<br>696874  | 0.0979014085<br>7394167  | 0 | 0 | 12.838.961.03<br>8.961.000 | 31.638.855.31<br>1.433.900 | IGF1       |  |  |
| positive regulation of signal transduction (GO:0009967)                     | 0.09648082675<br>964229  | 0.1102234818<br>2860886  | 0 | 0 | 11.235.628.91<br>2.919.700 | 26.273.517.98<br>1.296.400 | IGF1       |  |  |
| positive regulation of phosphorylation (GO:0042327)                         | 0.09684684568<br>436021  | 0.1102234818<br>2860886  | 0 | 0 | 1.119.047.619.<br>047.610  | 26.125.559.41<br>9.255.800 | IGF1       |  |  |
| positive regulation of cell differentiation (GO:0045597)                    | 0.09867499486<br>063239  | 0.1116870820<br>9500149  | 0 | 0 | 10.969.983.32<br>4.068.900 | 25.405.644.47<br>3.217.400 | IGF1       |  |  |
| positive regulation of cell migration (GO:0030335)                          | 0.10268552958<br>497451  | 0.1155913611<br>721571   | 0 | 0 | 10.513.859.27<br>5.053.300 | 23.930.427.62<br>9.401.800 | IGF1       |  |  |



## 5. Supplementary Table S5 (Proteomic analysis; Overview of all significantly altered pathways in the offspring by maternal diet)

|                                                                               |                         |                         |   |   |                            |                            |           |  |  |
|-------------------------------------------------------------------------------|-------------------------|-------------------------|---|---|----------------------------|----------------------------|-----------|--|--|
| positive regulation of MAPK cascade (GO:0043410)                              | 0.10450333208<br>24488  | 0.1169982957<br>0100247 | 0 | 0 | 1.031.868.131.<br>868.130  | 2.330.511.655.<br>471.740  | IGF1      |  |  |
| proteolysis (GO:0006508)                                                      | 0.10921454706<br>437869 | 0.1216118740<br>284433  | 0 | 0 | 9.843.156.843.<br>156.840  | 21.797.090.17<br>8.084.400 | PRS<br>S2 |  |  |
| extracellular matrix organization (GO:0030198)                                | 0.11390406037<br>15798  | 0.1261518087<br>986314  | 0 | 0 | 94.089.823.22<br>0.258     | 204.400.615.3<br>48.683    | PRS<br>S2 |  |  |
| MAPK cascade (GO:0000165)                                                     | 0.11498318292<br>16247  | 0.1266659662<br>1312667 | 0 | 0 | 9.314.096.499.<br>526.960  | 2.014.610.568.<br>709.960  | IGF1      |  |  |
| negative regulation of gene expression (GO:0010629)                           | 0.12179096137<br>390887 | 0.1334517981<br>01198   | 0 | 0 | 87.543.391.18<br>8.251     | 1.843.181.572.<br>708.940  | IGF1      |  |  |
| positive regulation of protein phosphorylation (GO:0001934)                   | 0.13913684107<br>142335 | 0.1516517950<br>3022863 | 0 | 0 | 7.576.061.776.<br>061.770  | 14.942.246.65<br>5.144.300 | IGF1      |  |  |
| negative regulation of programmed cell death (GO:0043069)                     | 0.14263974603<br>941806 | 0.1546515141<br>2694803 | 0 | 0 | 7.372.932.330.<br>827.060  | 1.435.829.236.<br>085.330  | IGF1      |  |  |
| positive regulation of macromolecule metabolic process (GO:0010604)           | 0.14368818255<br>703167 | 0.1549725947<br>9973047 | 0 | 0 | 7.314.061.917.<br>195.070  | 14.190.082.66<br>3.446.400 | IGF1      |  |  |
| transmembrane receptor protein tyrosine kinase signaling pathway (GO:0007169) | 0.15064913556<br>710083 | 0.1616339683<br>6886862 | 0 | 0 | 6.943.991.492.<br>378.580  | 13.143.599.25<br>8.783.100 | IGF1      |  |  |
| regulation of cell migration (GO:0030334)                                     | 0.15203536892<br>875155 | 0.1622760932<br>6074    | 0 | 0 | 6.874.341.874.<br>341.870  | 12.948.799.72<br>9.129.400 | IGF1      |  |  |
| cellular protein metabolic process (GO:0044267)                               | 0.15514715809<br>285315 | 0.1647438895<br>2127705 | 0 | 0 | 6.722.527.472.<br>527.470  | 12.526.631.34<br>5.187.200 | IGF1      |  |  |
| positive regulation of cell population proliferation (GO:0008284)             | 0.17462414847<br>531177 | 0.1844747414<br>662268  | 0 | 0 | 5.895.197.825.<br>430.380  | 10.287.823.72<br>4.852.200 | IGF1      |  |  |
| positive regulation of gene expression (GO:0010628)                           | 0.17732607109<br>808496 | 0.1863733196<br>2349746 | 0 | 0 | 5.794.772.794.<br>772.790  | 1.002.359.534.<br>647.410  | IGF1      |  |  |
| negative regulation of apoptotic process (GO:0043066)                         | 0.17833729496<br>299572 | 0.1864846840<br>729803  | 0 | 0 | 5.757.969.303.<br>423.840  | 9.927.191.691.<br>507.290  | IGF1      |  |  |
| positive regulation of nucleic acid-templated transcription (GO:1903508)      | 0.18705577635<br>20291  | 0.1946135854<br>9756563 | 0 | 0 | 5.457.142.857.<br>142.850  | 9.148.072.900.<br>906.000  | IGF1      |  |  |
| positive regulation of intracellular signal transduction (GO:1902533)         | 0.19866431634<br>6586   | 0.2056525083<br>7887797 | 0 | 0 | 5.097.509.829.<br>619.920  | 8.238.283.067.<br>939.570  | IGF1      |  |  |
| regulation of apoptotic process (GO:0042981)                                  | 0.26103080878<br>83377  | 0.2688617330<br>519878  | 0 | 0 | 3.711.393.869.<br>288.600  | 4.984.835.595.<br>660.660  | IGF1      |  |  |
| regulation of cell population proliferation (GO:0042127)                      | 0.26775855966<br>99408  | 0.2744192203<br>582478  | 0 | 0 | 3.600.262.123.<br>197.900  | 4.743.955.956.<br>365.440  | IGF1      |  |  |
| positive regulation of transcription by RNA polymerase II (GO:0045944)        | 0.31048641241<br>381475 | 0.3166346582<br>0418735 | 0 | 0 | 3.005.985.194.<br>518.820  | 35.158.457.90<br>8.428.100 | IGF1      |  |  |
| regulation of gene expression (GO:0010468)                                    | 0.35837925527<br>90436  | 0.3636755004<br>3095065 | 0 | 0 | 25.064.935.06<br>4.935.000 | 2.572.072.101.<br>808.580  | IGF1      |  |  |
| positive regulation of transcription, DNA-templated (GO:0045893)              | 0.38606093660<br>47682  | 0.3898458477<br>4795217 | 0 | 0 | 22.733.865.11<br>9.651.900 | 21.637.184.71<br>9.489.500 | IGF1      |  |  |
| regulation of transcription by RNA polymerase II (GO:0006357)                 | 0.60746885515<br>72656  | 0.6104321178<br>653498  | 0 | 0 | 11.523.809.52<br>3.809.500 | 0.5744093242<br>839072     | IGF1      |  |  |
| regulation of transcription, DNA-templated (GO:0006355)                       | 0.61412638892<br>03222  | 0.6141263889<br>203222  | 0 | 0 | 11.304.375.51<br>7.482.900 | 0.5511499456<br>9996       | IGF1      |  |  |
